# Supplementary material for: Manipulation of N-heterocyclic carbene reactivity with practical oriented electric fields
Source: Royal Society of Chemistry journal article supplement (doi:10.1039/d2cp04507a), 2022-12-08
Supplement: d2cp04507a1.pdf [file d2cp04507a1.pdf]

## Manipulation of N-Heterocyclic Carbene Reactivity with Practical Oriented Electric Fields

Mitchell T. Blyth<sup>a</sup> and Michelle L. Coote<sup>b\*</sup>

<sup>a</sup> Research School of Chemistry, Australian National University, Canberra, Australian Capital Territory 2601, Australia

<sup>b</sup> Institute for Nanoscale Science and Technology, College of Science and Engineering, Flinders University, Bedford Park, South Australia 5042, Australia

\* michelle.coote@flinders.edu.au

### Supplementary Information

#### Table of Contents

|                                                                                                                                                                                           |      |
|-------------------------------------------------------------------------------------------------------------------------------------------------------------------------------------------|------|
| S1. General Remarks .....                                                                                                                                                                 | S2   |
| S2. Supplementary Figures Showing Electrostatic Switches on GEI and N .....                                                                                                               | S3   |
| S3. Electronic Energies of Singlet & Triplet NHCs in Test Set under EEFs Across Different Solvents .....                                                                                  | S5   |
| S4. Electronic Singlet-Triplet Gaps of NHCs in Test Set under EEFs Across Different Solvents .....                                                                                        | S95  |
| S5. Benchmark: Effect of Geometry Optimisation versus Single-Points of I <sub>1a</sub> under EEFs .....                                                                                   | S140 |
| S6. Benchmark: Point Charges Approximately Reproduce D-LEF Electrostatic Switches .....                                                                                                   | S145 |
| S7. Benchmark: Comparison of CCSD(T) and DFT Energies of I <sub>1a</sub> under EEFs .....                                                                                                 | S146 |
| S8. Benchmark: Investigation of Spin-State Switching of Simple Carbenes Under EEFs .....                                                                                                  | S147 |
| S9. Natural Resonance Theory Calculation Results .....                                                                                                                                    | S159 |
| S10. Gibbs Free Energies and Components, Frontier Orbital Energies, Nucleophilicity and Electrophilicity Parameters of Unsubstituted NHCs in Test Set Across Different Solvents .....     | S160 |
| S11. Correction Procedure for Electrostatic Switch Values .....                                                                                                                           | S166 |
| S12. Gibbs Free Energies and Components, Frontier Orbital Energies, Nucleophilicity and Electrophilicity Parameters of D-LEF-Substituted NHCs in Test Set Across Different Solvents ..... | S167 |
| S13. Gibbs Free Energy Surfaces & Components for D-LEF-Substituted and Unsubstituted Benzoin Condensations Across Different Solvents .....                                                | S215 |
| S14. PhotoNHC Switching Results .....                                                                                                                                                     | S233 |
| S15. Additional Analysis of Benzoin Condensation .....                                                                                                                                    | S236 |
| S16. Investigation of Quadrupoles .....                                                                                                                                                   | S238 |
| S17. Gaussian Log Files for Every Species .....                                                                                                                                           | S239 |

## S1. General Remarks

Throughout this document, the following abbreviations are used:

ZPVE = Zero-Point Vibrational Energy

TC = Thermal Corrections

S = Entropy

TS = Temperature in Kelvin \* Entropy

H = Enthalpy

G = Gibbs Free Energy

G<sub>soln</sub> = Gibbs Free Energy in Solution

HOMO = Highest Occupied Molecular Orbital

LUMO = Lowest Unoccupied Molecular Orbital

GEI = Global Electrophilicity Index

N = Nucleophilicity Index

eV = Electron Volts

All raw log files used in this article can be found at: <https://github.com/Ecaloota/CarbenesElectricFields>

## S2. Supplementary Figures Showing Electrostatic Switches on GEI and N

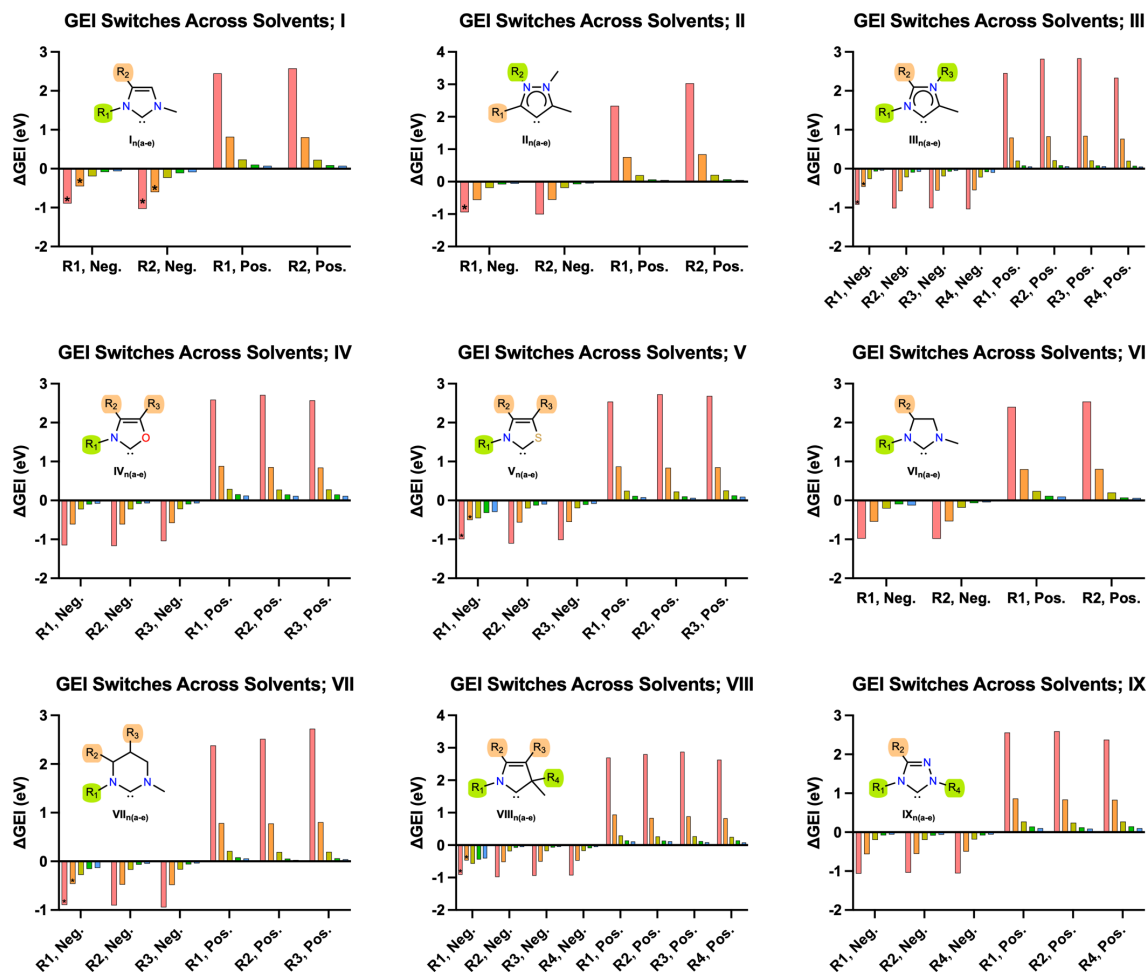

**Figure S1.** The DLEF-induced electrostatic GEI switches, in eV, for each of the carbenes in the test set (inlaid), with D-LEFs sampled at each position and across multiple solvents. Red = Gas, Orange = Toluene, Yellow = DCM, Green = MeCN, Blue = Water. A positive switch value indicates that the GEI increased after incorporation of the charged D-LEF.

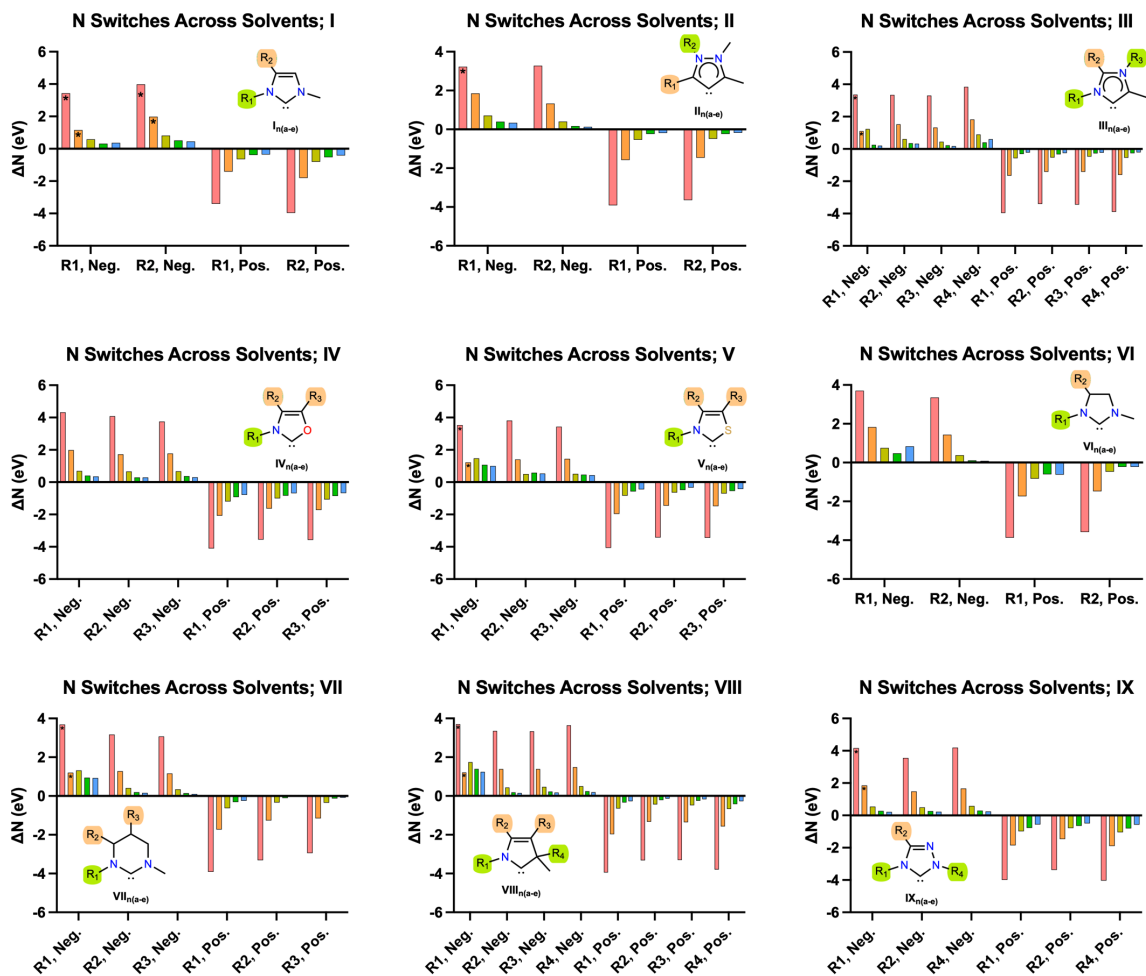

**Figure S2.** The DLEF-induced electrostatic N switches, in eV, for each of the carbenes in the test set (inlaid), with D-LEFs sampled at each position and across multiple solvents. Red = Gas, Orange = Toluene, Yellow = DCM, Green = MeCN, Blue = Water. A positive switch value indicates that the N increased after incorporation of the charged D-LEF.



### S3. Electronic Energies of Singlet & Triplet NHCs in Test Set under EEFs Across Different Solvents

Table S1. I<sub>1a</sub> Under EEFs in Gas. Energy given in Hartree.

| Field   | Energy, X-EEF | Energy, Y-EEF | Energy, Z-EEF |
|---------|---------------|---------------|---------------|
| -0.0030 | -304.774650   | -304.777500   | -304.777680   |
| -0.0025 | -304.775040   | -304.777420   | -304.777550   |
| -0.0020 | -304.775440   | -304.777360   | -304.777440   |
| -0.0015 | -304.775860   | -304.777310   | -304.777360   |
| -0.0010 | -304.776310   | -304.777280   | -304.777300   |
| -0.0005 | -304.776770   | -304.777250   | -304.777260   |
| +0.0000 | -304.777250   | -304.777250   | -304.777250   |
| +0.0005 | -304.777750   | -304.777250   | -304.777260   |
| +0.0010 | -304.778270   | -304.777280   | -304.777300   |
| +0.0015 | -304.778810   | -304.777310   | -304.777360   |
| +0.0020 | -304.779370   | -304.777360   | -304.777440   |
| +0.0025 | -304.779950   | -304.777420   | -304.777550   |
| +0.0030 | -304.780540   | -304.777500   | -304.777680   |

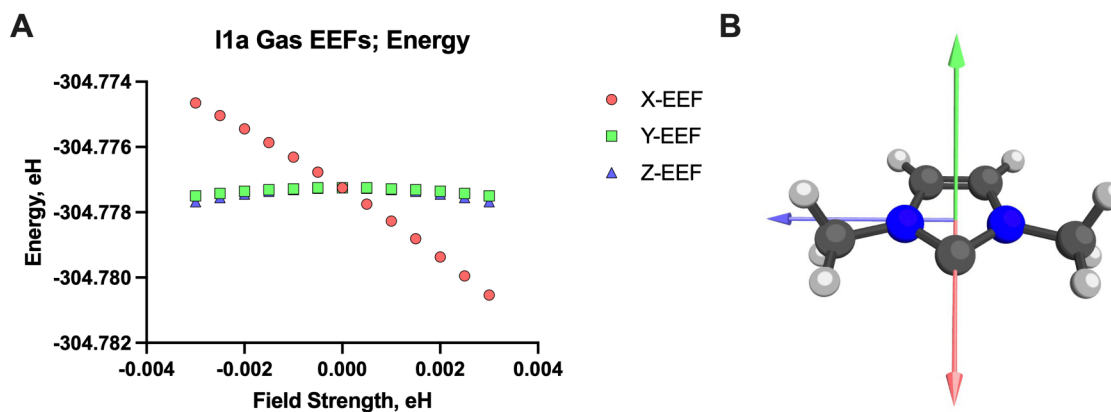

Figure S3. I<sub>1a</sub> Energy under EEFs in Gas. Axis definitions given in (B).

**Table S2.  $I_{1a}$  Under EEFs in SMD Toluene.**  
Energy given in Hartree.

| Field   | Energy, X-EEF | Energy, Y-EEF | Energy, Z-EEF |
|---------|---------------|---------------|---------------|
| -0.0030 | -304.790506   | -304.794008   | -304.794216   |
| -0.0025 | -304.790984   | -304.793920   | -304.794065   |
| -0.0020 | -304.791485   | -304.793849   | -304.793941   |
| -0.0015 | -304.792009   | -304.793793   | -304.793845   |
| -0.0010 | -304.792557   | -304.793753   | -304.793776   |
| -0.0005 | -304.793127   | -304.793729   | -304.793735   |
| +0.0000 | -304.793721   | -304.793721   | -304.793721   |
| +0.0005 | -304.794338   | -304.793729   | -304.793735   |
| +0.0010 | -304.794978   | -304.793753   | -304.793776   |
| +0.0015 | -304.795642   | -304.793793   | -304.793845   |
| +0.0020 | -304.796329   | -304.793849   | -304.793941   |
| +0.0025 | -304.797039   | -304.793920   | -304.794065   |
| +0.0030 | -304.797772   | -304.794008   | -304.794216   |

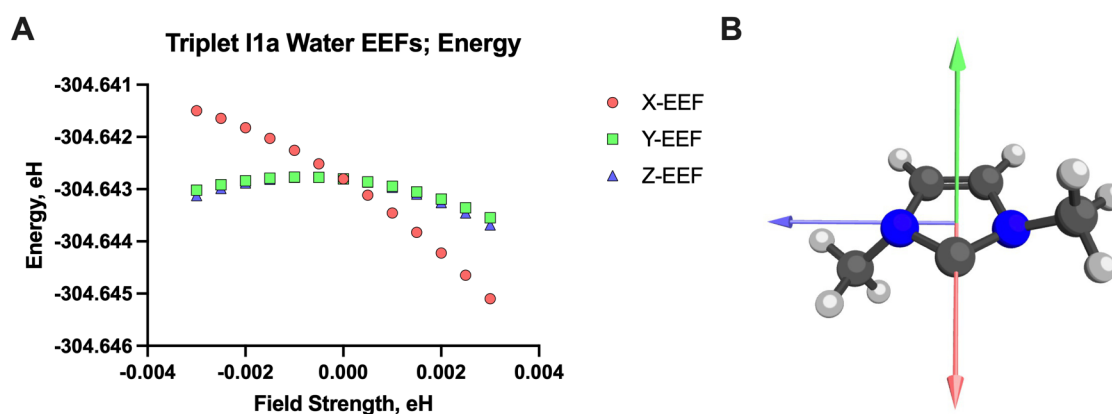

**Figure S4.  $I_{1a}$  Energy under EEFs in Toluene.** Axis definitions given in (B).

**Table S3. I<sub>1a</sub> Under EEFs in SMD Dichloromethane.** Energy given in Hartree.

| Field   | Energy, X-EEF | Energy, Y-EEF | Energy, Z-EEF |
|---------|---------------|---------------|---------------|
| -0.0030 | -304.794609   | -304.798860   | -304.799073   |
| -0.0025 | -304.795194   | -304.798757   | -304.798905   |
| -0.0020 | -304.795805   | -304.798673   | -304.798768   |
| -0.0015 | -304.796444   | -304.798608   | -304.798661   |
| -0.0010 | -304.797110   | -304.798561   | -304.798585   |
| -0.0005 | -304.797803   | -304.798533   | -304.798539   |
| +0.0000 | -304.798523   | -304.798523   | -304.798523   |
| +0.0005 | -304.799271   | -304.798533   | -304.798539   |
| +0.0010 | -304.800046   | -304.798561   | -304.798585   |
| +0.0015 | -304.800848   | -304.798608   | -304.798661   |
| +0.0020 | -304.801677   | -304.798673   | -304.798768   |
| +0.0025 | -304.802534   | -304.798757   | -304.798905   |
| +0.0030 | -304.803418   | -304.798860   | -304.799073   |

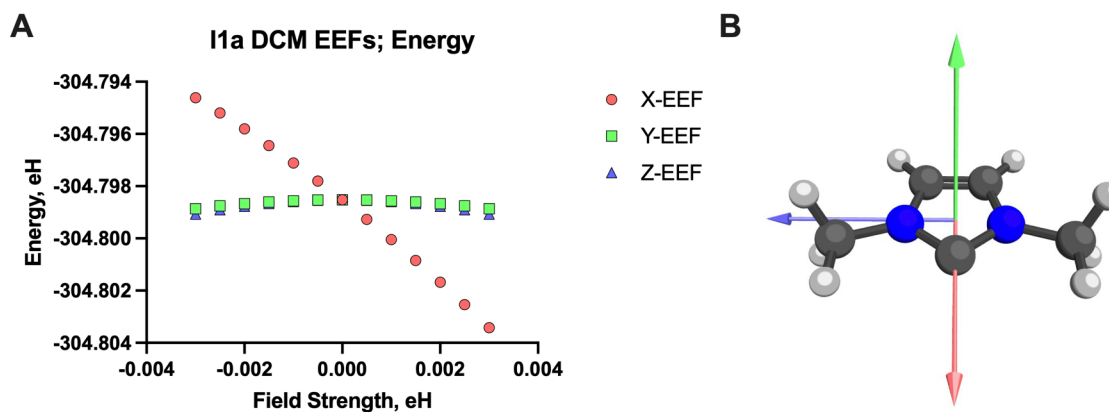

**Figure S5. I<sub>1a</sub> Energy under EEFs in DCM.** Axis definitions given in (B).

Table S4.  $I_{1a}$  Under EEFs in SMD Acetonitrile. Energy given in Hartree.

| Field   | Energy, X-EEF | Energy, Y-EEF | Energy, Z-EEF |
|---------|---------------|---------------|---------------|
| -0.0030 | -304.794685   | -304.799256   | -304.799465   |
| -0.0025 | -304.795315   | -304.799146   | -304.799291   |
| -0.0020 | -304.795974   | -304.799056   | -304.799149   |
| -0.0015 | -304.796661   | -304.798986   | -304.799039   |
| -0.0010 | -304.797377   | -304.798936   | -304.798960   |
| -0.0005 | -304.798122   | -304.798906   | -304.798912   |
| +0.0000 | -304.798896   | -304.798896   | -304.798896   |
| +0.0005 | -304.799699   | -304.798906   | -304.798912   |
| +0.0010 | -304.800531   | -304.798936   | -304.798960   |
| +0.0015 | -304.801392   | -304.798986   | -304.799039   |
| +0.0020 | -304.802282   | -304.799056   | -304.799149   |
| +0.0025 | -304.803201   | -304.799146   | -304.799291   |
| +0.0030 | -304.804149   | -304.799256   | -304.799465   |

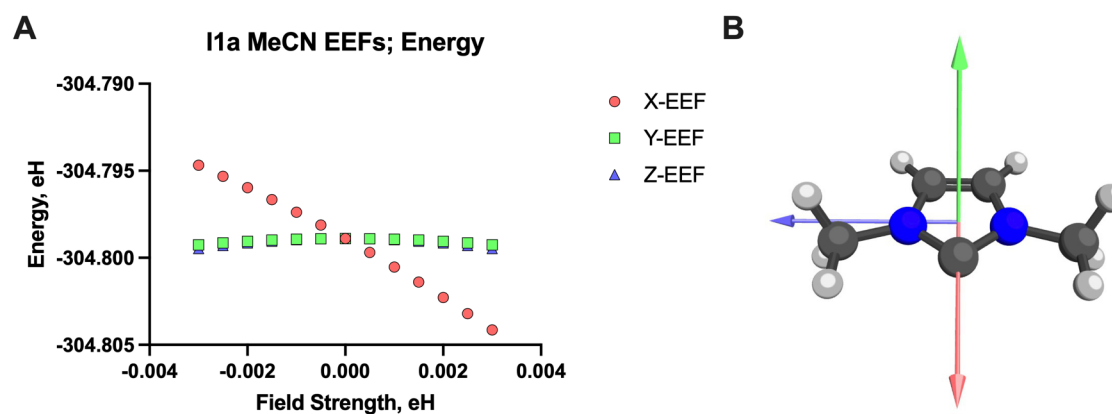

Figure S6.  $I_{1a}$  Energy under EEFs in MeCN. Axis definitions given in (B).

Table S5.  $I_{1a}$  Under EEFs in SMD Water. Energy given in Hartree.

| Field   | Energy, X-EEF | Energy, Y-EEF | Energy, Z-EEF |
|---------|---------------|---------------|---------------|
| -0.0030 | -304.779810   | -304.784448   | -304.784656   |
| -0.0025 | -304.780449   | -304.784336   | -304.784481   |
| -0.0020 | -304.781118   | -304.784245   | -304.784337   |
| -0.0015 | -304.781815   | -304.784174   | -304.784226   |
| -0.0010 | -304.782542   | -304.784123   | -304.784147   |
| -0.0005 | -304.783298   | -304.784093   | -304.784099   |
| +0.0000 | -304.784083   | -304.784083   | -304.784083   |
| +0.0005 | -304.784897   | -304.784093   | -304.784099   |
| +0.0010 | -304.785741   | -304.784123   | -304.784147   |
| +0.0015 | -304.786614   | -304.784174   | -304.784226   |
| +0.0020 | -304.787517   | -304.784245   | -304.784337   |
| +0.0025 | -304.788449   | -304.784336   | -304.784481   |
| +0.0030 | -304.789410   | -304.784448   | -304.784656   |

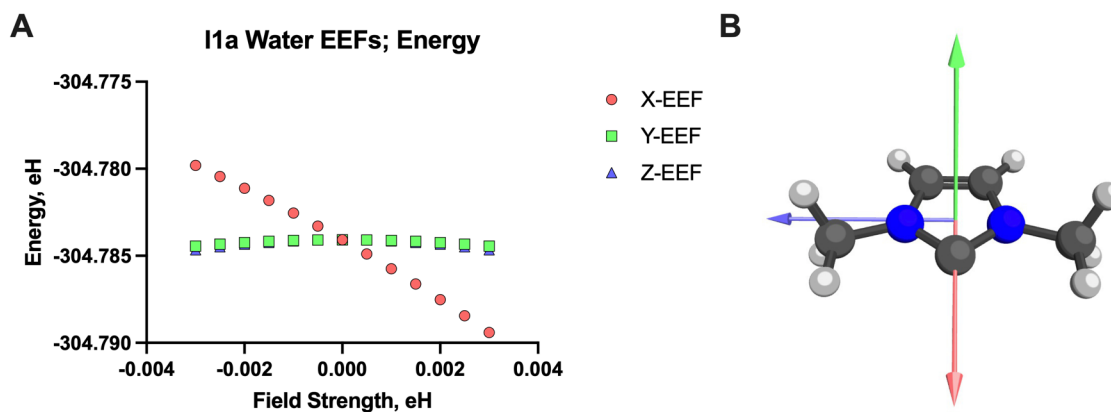

Figure S7.  $I_{1a}$  Energy under EEFs in Water. Axis definitions given in (B).

Table S6.  $^3I_{1a}$  Under EEFs in Gas. Energy given in Hartree.

| Field   | Energy, X-EEF | Energy, Y-EEF | Energy, Z-EEF |
|---------|---------------|---------------|---------------|
| -0.0030 | -304.639620   | -304.640570   | -304.640640   |
| -0.0025 | -304.639700   | -304.640500   | -304.640540   |
| -0.0020 | -304.639800   | -304.640440   | -304.640460   |
| -0.0015 | -304.639930   | -304.640410   | -304.640410   |
| -0.0010 | -304.640070   | -304.640390   | -304.640390   |
| -0.0005 | -304.640230   | -304.640390   | -304.640380   |
| +0.0000 | -304.640410   | -304.640410   | -304.640410   |
| +0.0005 | -304.640600   | -304.640440   | -304.640450   |
| +0.0010 | -304.640820   | -304.640490   | -304.640520   |
| +0.0015 | -304.641060   | -304.640570   | -304.640620   |
| +0.0020 | -304.641310   | -304.640650   | -304.640740   |
| +0.0025 | -304.641580   | -304.640760   | -304.640890   |
| +0.0030 | -304.641880   | -304.640890   | -304.641060   |

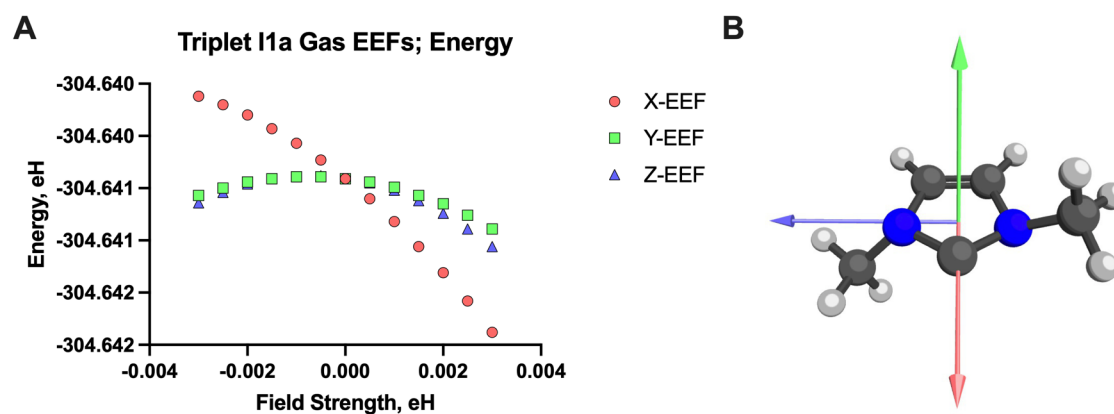

Figure S8.  $^3I_{1a}$  Energy under EEFs in Gas. Axis definitions given in (B).

Table S7.  $^3I_{1a}$  Under EEFs in SMD Toluene. Energy given in Hartree.

| Field   | Energy, X-EEF | Energy, Y-EEF | Energy, Z-EEF |
|---------|---------------|---------------|---------------|
| -0.0030 | -304.651446   | -304.652611   | -304.652702   |
| -0.0025 | -304.651555   | -304.652529   | -304.652585   |
| -0.0020 | -304.651686   | -304.652467   | -304.652497   |
| -0.0015 | -304.651838   | -304.652427   | -304.652437   |
| -0.0010 | -304.652013   | -304.652407   | -304.652406   |
| -0.0005 | -304.652210   | -304.652408   | -304.652404   |
| +0.0000 | -304.652429   | -304.652429   | -304.652429   |
| +0.0005 | -304.652671   | -304.652471   | -304.652483   |
| +0.0010 | -304.652934   | -304.652534   | -304.652566   |
| +0.0015 | -304.653220   | -304.652618   | -304.652677   |
| +0.0020 | -304.653528   | -304.652723   | -304.652816   |
| +0.0025 | -304.653858   | -304.652848   | -304.652984   |
| +0.0030 | -304.654211   | -304.652995   | -304.653181   |

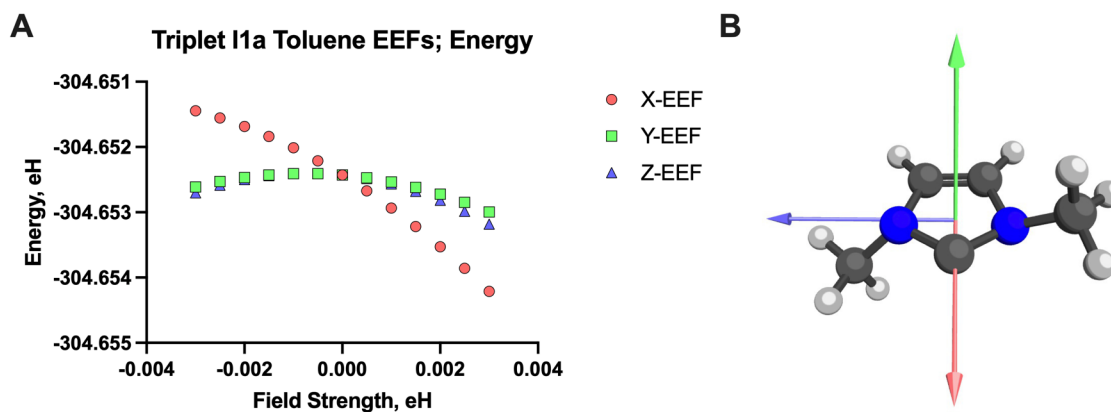

Figure S9.  $^3I_{1a}$  Energy under EEFs in Toluene. Axis definitions given in (B).

Table S8.  $^3I_{1a}$  Under EEFs in SMD Dichloromethane. Energy given in Hartree.

| Field   | Energy, X-EEF | Energy, Y-EEF | Energy, Z-EEF |
|---------|---------------|---------------|---------------|
| -0.0030 | -304.653509   | -304.654909   | -304.655011   |
| -0.0025 | -304.653645   | -304.654814   | -304.654881   |
| -0.0020 | -304.653806   | -304.654744   | -304.654782   |
| -0.0015 | -304.653992   | -304.654698   | -304.654715   |
| -0.0010 | -304.654205   | -304.654677   | -304.654681   |
| -0.0005 | -304.654443   | -304.654679   | -304.654678   |
| +0.0000 | -304.654706   | -304.654706   | -304.654706   |
| +0.0005 | -304.654996   | -304.654758   | -304.654767   |
| +0.0010 | -304.655311   | -304.654834   | -304.654860   |
| +0.0015 | -304.655652   | -304.654934   | -304.654984   |
| +0.0020 | -304.656019   | -304.655059   | -304.655141   |
| +0.0025 | -304.656412   | -304.655209   | -304.655329   |
| +0.0030 | -304.656830   | -304.655383   | -304.655549   |

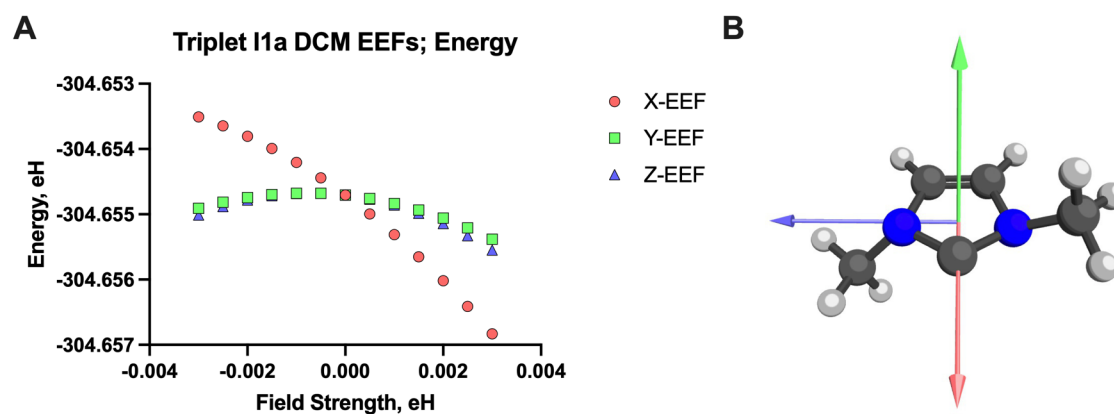

Figure S10.  $^3I_{1a}$  Energy under EEFs in DCM. Axis definitions given in (B).



Table S9.  $^3I_{1a}$  Under EEFs in SMD Acetonitrile. Energy given in Hartree.

| Field   | Energy, X-EEF | Energy, Y-EEF | Energy, Z-EEF |
|---------|---------------|---------------|---------------|
| -0.0030 | -304.652722   | -304.654222   | -304.654326   |
| -0.0025 | -304.652869   | -304.654122   | -304.654191   |
| -0.0020 | -304.653043   | -304.654047   | -304.654088   |
| -0.0015 | -304.653244   | -304.653999   | -304.654019   |
| -0.0010 | -304.653472   | -304.653976   | -304.653983   |
| -0.0005 | -304.653728   | -304.653980   | -304.653980   |
| +0.0000 | -304.654010   | -304.654010   | -304.654010   |
| +0.0005 | -304.654320   | -304.654066   | -304.654073   |
| +0.0010 | -304.654656   | -304.654148   | -304.654170   |
| +0.0015 | -304.655020   | -304.654257   | -304.654299   |
| +0.0020 | -304.655412   | -304.654392   | -304.654462   |
| +0.0025 | -304.655831   | -304.654553   | -304.654658   |
| +0.0030 | -304.656278   | -304.654741   | -304.654887   |

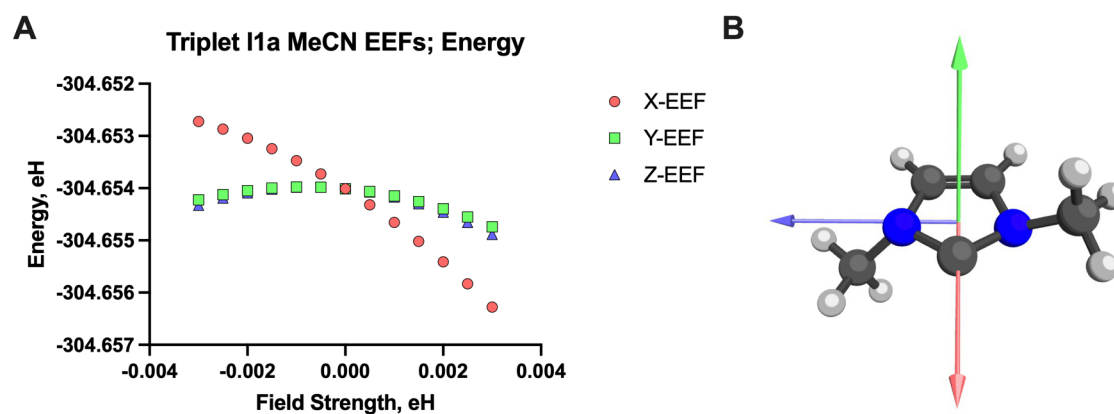

Figure S11.  $^3I_{1a}$  Energy under EEFs in MeCN. Axis definitions given in (B).

Table S10.  ${}^3I_{1a}$  Under EEFs in SMD Water. Energy given in Hartree.

| Field   | Energy, X-EEF | Energy, Y-EEF | Energy, Z-EEF |
|---------|---------------|---------------|---------------|
| -0.0030 | -304.641496   | -304.643017   | -304.643121   |
| -0.0025 | -304.641645   | -304.642915   | -304.642984   |
| -0.0020 | -304.641822   | -304.642840   | -304.642881   |
| -0.0015 | -304.642026   | -304.642791   | -304.642812   |
| -0.0010 | -304.642258   | -304.642768   | -304.642775   |
| -0.0005 | -304.642516   | -304.642772   | -304.642772   |
| +0.0000 | -304.642803   | -304.642803   | -304.642803   |
| +0.0005 | -304.643116   | -304.642860   | -304.642866   |
| +0.0010 | -304.643458   | -304.642943   | -304.642964   |
| +0.0015 | -304.643827   | -304.643054   | -304.643094   |
| +0.0020 | -304.644223   | -304.643191   | -304.643258   |
| +0.0025 | -304.644648   | -304.643355   | -304.643455   |
| +0.0030 | -304.645100   | -304.643546   | -304.643686   |

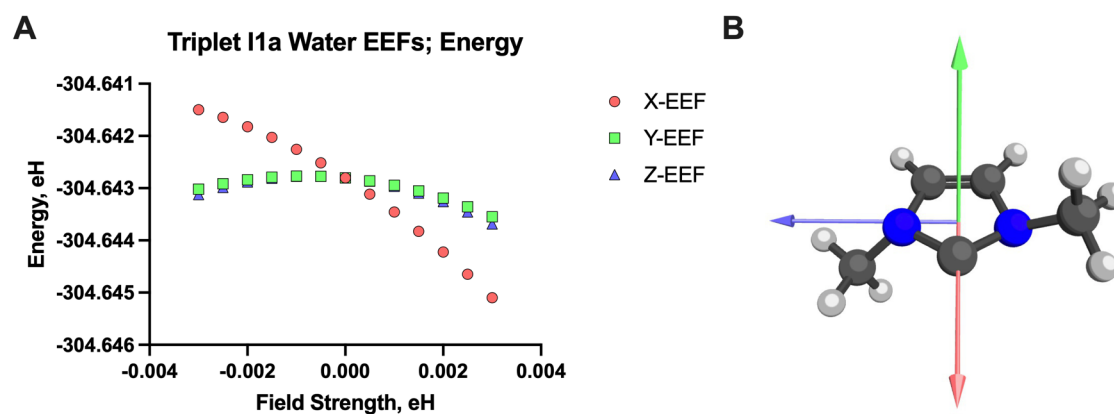

Figure S12.  ${}^3I_{1a}$  Energy under EEFs in Water. Axis definitions given in (B).

Table S11.  $\text{II}_{1a}$  Under EEFs in Gas. Energy given in Hartree.

| Field   | Energy, X-EEF | Energy, Y-EEF | Energy, Z-EEF |
|---------|---------------|---------------|---------------|
| -0.0030 | -383.318743   | -383.326955   | -383.327197   |
| -0.0025 | -383.319982   | -383.326854   | -383.327022   |
| -0.0020 | -383.321251   | -383.326771   | -383.326878   |
| -0.0015 | -383.322549   | -383.326707   | -383.326767   |
| -0.0010 | -383.323877   | -383.326661   | -383.326687   |
| -0.0005 | -383.325236   | -383.326633   | -383.326640   |
| +0.0000 | -383.326624   | -383.326624   | -383.326624   |
| +0.0005 | -383.328041   | -383.326633   | -383.326639   |
| +0.0010 | -383.329489   | -383.326660   | -383.326687   |
| +0.0015 | -383.330966   | -383.326706   | -383.326767   |
| +0.0020 | -383.332473   | -383.326771   | -383.326878   |
| +0.0025 | -383.334010   | -383.326853   | -383.327022   |
| +0.0030 | -383.335577   | -383.326954   | -383.327197   |

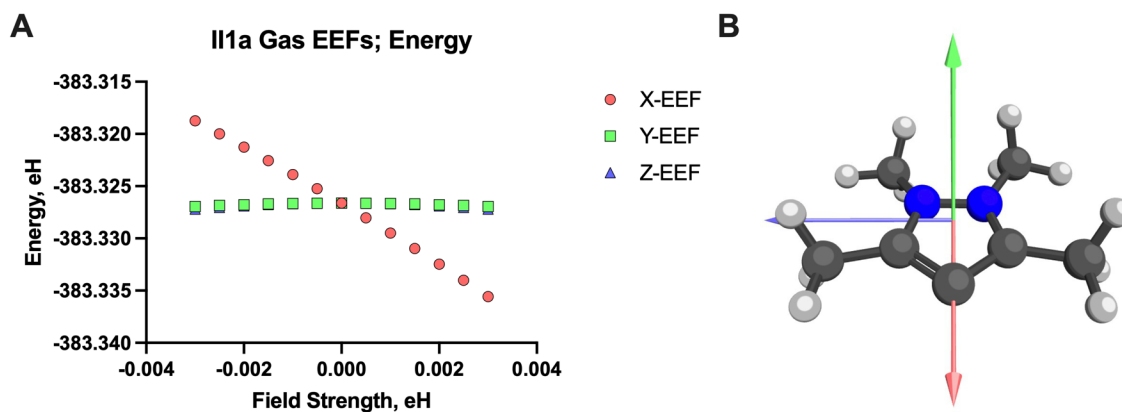

Figure S13.  $\text{II}_{1a}$  Energy under EEFs in Gas. Axis definitions given in (B).

Table S12. II<sub>1a</sub> Under EEFs in SMD Toluene. Energy given in Hartree.

| Field   | Energy, X-EEF | Energy, Y-EEF | Energy, Z-EEF |
|---------|---------------|---------------|---------------|
| -0.0030 | -383.337191   | -383.347277   | -383.347555   |
| -0.0025 | -383.338719   | -383.347159   | -383.347352   |
| -0.0020 | -383.340283   | -383.347062   | -383.347186   |
| -0.0015 | -383.341882   | -383.346987   | -383.347056   |
| -0.0010 | -383.343516   | -383.346933   | -383.346964   |
| -0.0005 | -383.345186   | -383.346901   | -383.346909   |
| +0.0000 | -383.346890   | -383.346890   | -383.346890   |
| +0.0005 | -383.348630   | -383.346901   | -383.346908   |
| +0.0010 | -383.350404   | -383.346933   | -383.346964   |
| +0.0015 | -383.352214   | -383.346986   | -383.347056   |
| +0.0020 | -383.354060   | -383.347062   | -383.347185   |
| +0.0025 | -383.355940   | -383.347158   | -383.347352   |
| +0.0030 | -383.357857   | -383.347276   | -383.347555   |

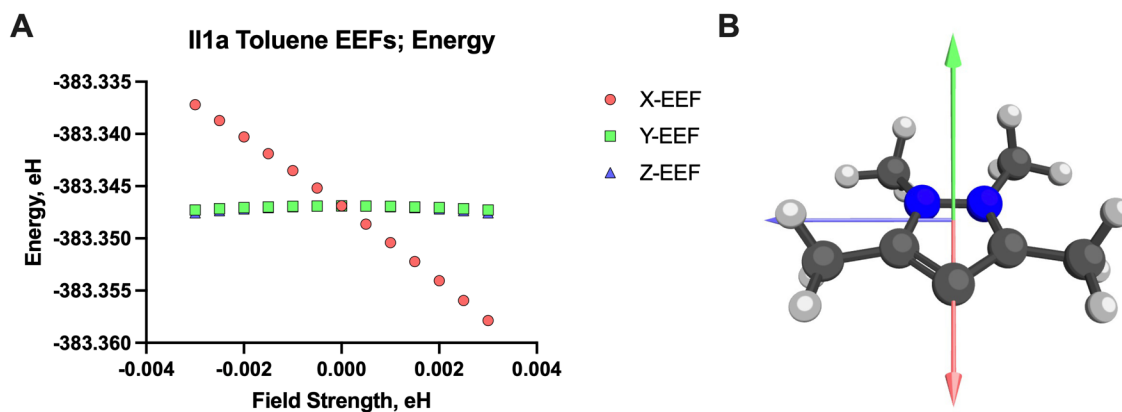

Figure S14. II<sub>1a</sub> Energy under EEFs in Toluene. Axis definitions given in (B).

**Table S13. II<sub>1a</sub> Under EEFs in SMD Dichloromethane.** Energy given in Hartree.

| Field   | Energy, X-EEF | Energy, Y-EEF | Energy, Z-EEF |
|---------|---------------|---------------|---------------|
| -0.0030 | -383.349230   | -383.361245   | -383.361527   |
| -0.0025 | -383.351054   | -383.361104   | -383.361299   |
| -0.0020 | -383.352918   | -383.360988   | -383.361113   |
| -0.0015 | -383.354823   | -383.360898   | -383.360969   |
| -0.0010 | -383.356769   | -383.360834   | -383.360865   |
| -0.0005 | -383.358755   | -383.360795   | -383.360803   |
| +0.0000 | -383.360782   | -383.360782   | -383.360782   |
| +0.0005 | -383.362851   | -383.360795   | -383.360803   |
| +0.0010 | -383.364960   | -383.360834   | -383.360865   |
| +0.0015 | -383.367110   | -383.360898   | -383.360968   |
| +0.0020 | -383.369302   | -383.360988   | -383.361113   |
| +0.0025 | -383.371535   | -383.361103   | -383.361299   |
| +0.0030 | -383.373809   | -383.361244   | -383.361526   |

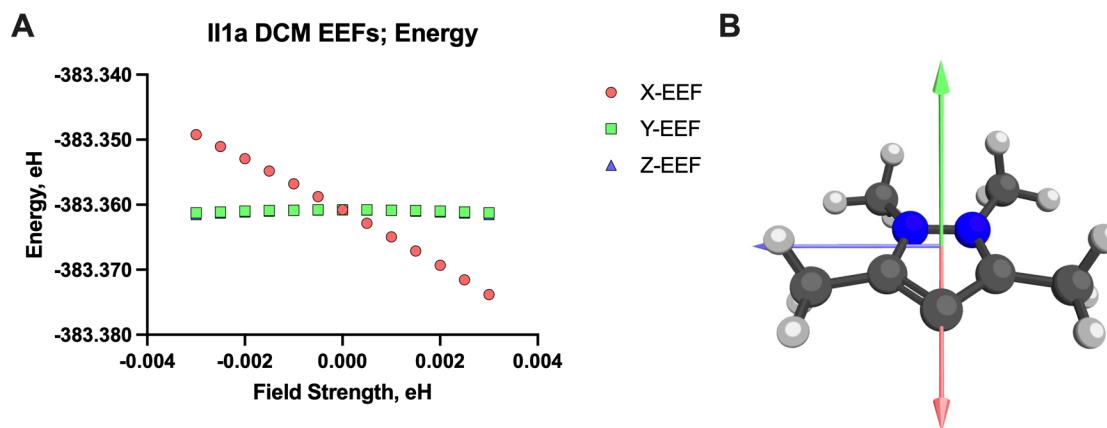

**Figure S15. II<sub>1a</sub> Energy under EEFs in DCM.** Axis definitions given in (B).

**Table S14. II<sub>1a</sub> Under EEFs in SMD Acetonitrile.** Energy given in Hartree.

| Field   | Energy, X-EEF | Energy, Y-EEF | Energy, Z-EEF |
|---------|---------------|---------------|---------------|
| -0.0030 | -383.351554   | -383.364356   | -383.364628   |
| -0.0025 | -383.353496   | -383.364203   | -383.364392   |
| -0.0020 | -383.355482   | -383.364078   | -383.364198   |
| -0.0015 | -383.357510   | -383.363980   | -383.364048   |
| -0.0010 | -383.359582   | -383.363911   | -383.363941   |
| -0.0005 | -383.361697   | -383.363869   | -383.363876   |
| +0.0000 | -383.363855   | -383.363855   | -383.363855   |
| +0.0005 | -383.366056   | -383.363869   | -383.363876   |
| +0.0010 | -383.368301   | -383.363910   | -383.363941   |
| +0.0015 | -383.370589   | -383.363980   | -383.364048   |
| +0.0020 | -383.372921   | -383.364077   | -383.364198   |
| +0.0025 | -383.375297   | -383.364202   | -383.364391   |
| +0.0030 | -383.377717   | -383.364355   | -383.364627   |

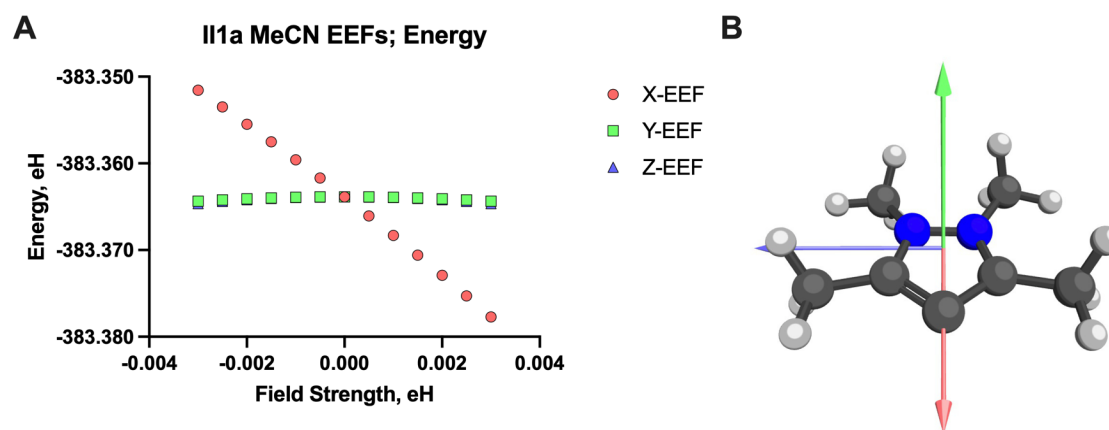

**Figure S16. II<sub>1a</sub> Energy under EEFs in MeCN.** Axis definitions given in (B).

**Table S15. II<sub>1a</sub> Under EEFs in SMD Water.** Energy given in Hartree.

| Field   | Energy, X-EEF | Energy, Y-EEF | Energy, Z-EEF |
|---------|---------------|---------------|---------------|
| -0.0030 | -383.344099   | -383.357064   | -383.357333   |
| -0.0025 | -383.346066   | -383.356908   | -383.357095   |
| -0.0020 | -383.348076   | -383.356781   | -383.356900   |
| -0.0015 | -383.350130   | -383.356682   | -383.356749   |
| -0.0010 | -383.352228   | -383.356611   | -383.356641   |
| -0.0005 | -383.354369   | -383.356568   | -383.356576   |
| +0.0000 | -383.356554   | -383.356554   | -383.356554   |
| +0.0005 | -383.358783   | -383.356568   | -383.356576   |
| +0.0010 | -383.361056   | -383.356610   | -383.356641   |
| +0.0015 | -383.363372   | -383.356681   | -383.356749   |
| +0.0020 | -383.365733   | -383.356780   | -383.356900   |
| +0.0025 | -383.368139   | -383.356907   | -383.357095   |
| +0.0030 | -383.370588   | -383.357063   | -383.357333   |

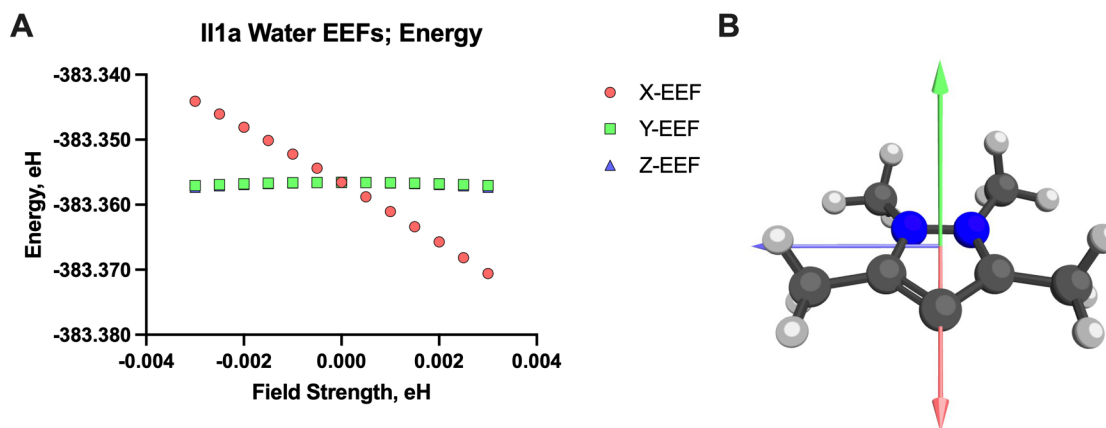

**Figure S17. II<sub>1a</sub> Energy under EEFs in Water.** Axis definitions given in (B).

Table S16.  ${}^3\text{II}_{1a}$  Under EEFs in Gas. Energy given in Hartree.

| Field   | Energy, X-EEF | Energy, Y-EEF | Energy, Z-EEF |
|---------|---------------|---------------|---------------|
| -0.0030 | -383.257891   | -383.259314   | -383.259560   |
| -0.0025 | -383.257998   | -383.259199   | -383.259370   |
| -0.0020 | -383.258132   | -383.259105   | -383.259214   |
| -0.0015 | -383.258294   | -383.259032   | -383.259094   |
| -0.0010 | -383.258482   | -383.258980   | -383.259007   |
| -0.0005 | -383.258697   | -383.258949   | -383.258956   |
| +0.0000 | -383.258938   | -383.258938   | -383.258938   |
| +0.0005 | -383.259207   | -383.258949   | -383.258956   |
| +0.0010 | -383.259502   | -383.258980   | -383.259007   |
| +0.0015 | -383.259824   | -383.259032   | -383.259094   |
| +0.0020 | -383.260173   | -383.259105   | -383.259214   |
| +0.0025 | -383.260549   | -383.259199   | -383.259370   |
| +0.0030 | -383.260951   | -383.259314   | -383.259560   |

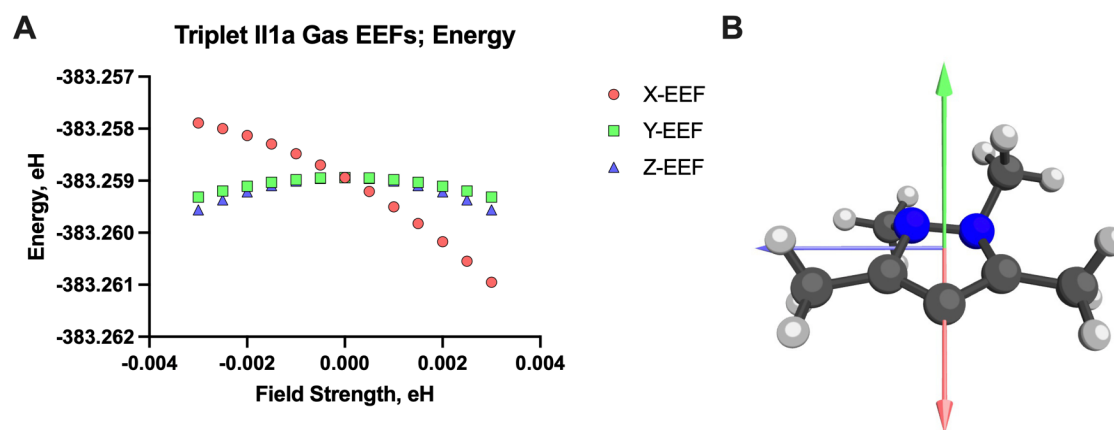

Figure S18.  ${}^3\text{II}_{1a}$  Energy under EEFs in Gas. Axis definitions given in (B).



Table S17.  $^3\text{II}_{1a}$  Under EEFs in SMD Toluene. Energy given in Hartree.

| Field   | Energy, X-EEF | Energy, Y-EEF | Energy, Z-EEF |
|---------|---------------|---------------|---------------|
| -0.0030 | -383.266340   | -383.268094   | -383.268388   |
| -0.0025 | -383.266479   | -383.267959   | -383.268163   |
| -0.0020 | -383.266650   | -383.267849   | -383.267980   |
| -0.0015 | -383.266853   | -383.267763   | -383.267837   |
| -0.0010 | -383.267088   | -383.267702   | -383.267734   |
| -0.0005 | -383.267355   | -383.267665   | -383.267673   |
| +0.0000 | -383.267653   | -383.267653   | -383.267653   |
| +0.0005 | -383.267983   | -383.267665   | -383.267673   |
| +0.0010 | -383.268344   | -383.267702   | -383.267734   |
| +0.0015 | -383.268738   | -383.267763   | -383.267837   |
| +0.0020 | -383.269163   | -383.267849   | -383.267980   |
| +0.0025 | -383.269620   | -383.267959   | -383.268163   |
| +0.0030 | -383.270109   | -383.268094   | -383.268388   |

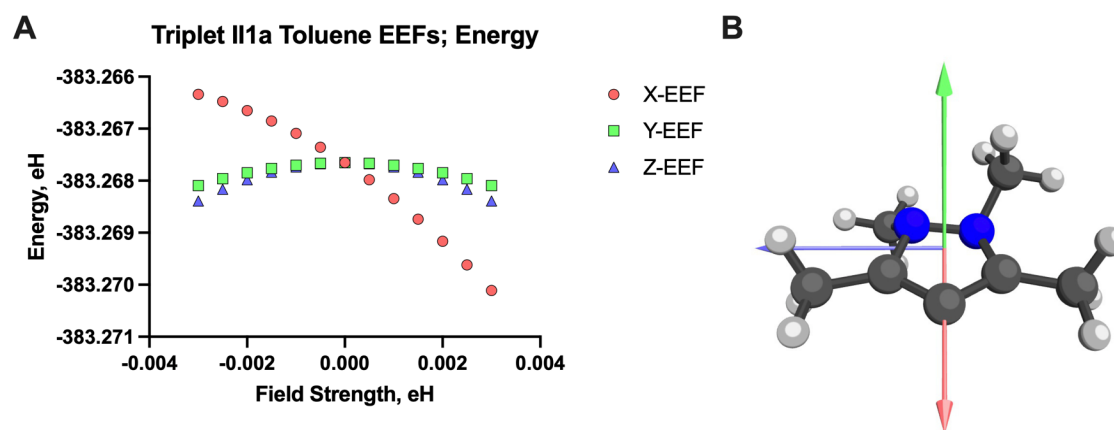

Figure S19.  $^3\text{II}_{1a}$  Energy under EEFs in Toluene. Axis definitions given in (B).

Table S18.  $^3\text{II}_{1a}$  Under EEFs in SMD Dichloromethane. Energy given in Hartree.

| Field   | Energy, X-EEF | Energy, Y-EEF | Energy, Z-EEF |
|---------|---------------|---------------|---------------|
| -0.0030 | -383.269263   | -383.271360   | -383.271674   |
| -0.0025 | -383.269433   | -383.271200   | -383.271417   |
| -0.0020 | -383.269640   | -383.271068   | -383.271207   |
| -0.0015 | -383.269883   | -383.270966   | -383.271044   |
| -0.0010 | -383.270163   | -383.270893   | -383.270927   |
| -0.0005 | -383.270480   | -383.270849   | -383.270858   |
| +0.0000 | -383.270834   | -383.270834   | -383.270834   |
| +0.0005 | -383.271225   | -383.270849   | -383.270858   |
| +0.0010 | -383.271652   | -383.270893   | -383.270927   |
| +0.0015 | -383.272116   | -383.270966   | -383.271044   |
| +0.0020 | -383.272617   | -383.271068   | -383.271207   |
| +0.0025 | -383.273155   | -383.271200   | -383.271417   |
| +0.0030 | -383.273730   | -383.271360   | -383.271674   |

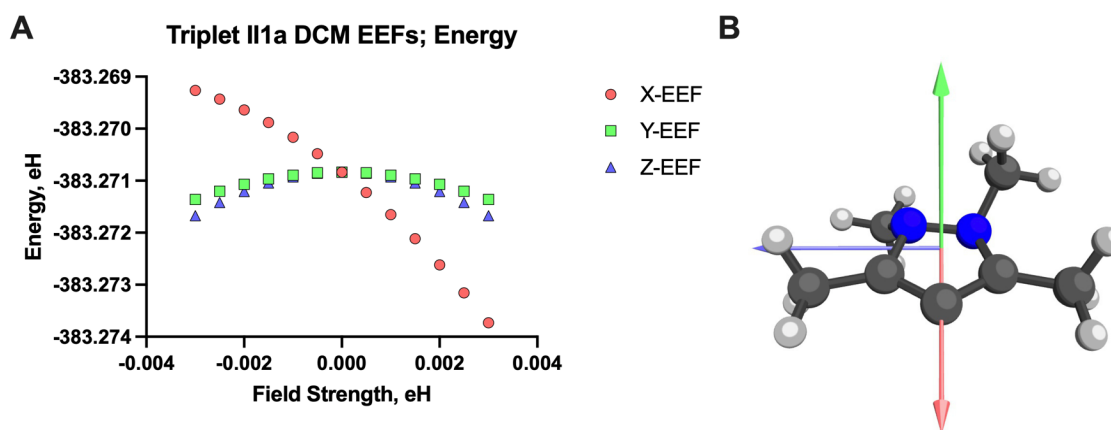

Figure S20.  $^3\text{II}_{1a}$  Energy under EEFs in DCM. Axis definitions given in (B).

Table S19.  ${}^3\text{II}_{1a}$  Under EEFs in SMD Acetonitrile. Energy given in Hartree.

| Field   | Energy, X-EEF | Energy, Y-EEF | Energy, Z-EEF |
|---------|---------------|---------------|---------------|
| -0.0030 | -383.268017   | -383.270259   | -383.270568   |
| -0.0025 | -383.268199   | -383.270085   | -383.270300   |
| -0.0020 | -383.268420   | -383.269943   | -383.270080   |
| -0.0015 | -383.268679   | -383.269832   | -383.269909   |
| -0.0010 | -383.268977   | -383.269753   | -383.269788   |
| -0.0005 | -383.269314   | -383.269706   | -383.269714   |
| +0.0000 | -383.269690   | -383.269690   | -383.269690   |
| +0.0005 | -383.270105   | -383.269706   | -383.269714   |
| +0.0010 | -383.270558   | -383.269753   | -383.269788   |
| +0.0015 | -383.271050   | -383.269832   | -383.269909   |
| +0.0020 | -383.271582   | -383.269943   | -383.270080   |
| +0.0025 | -383.272152   | -383.270085   | -383.270300   |
| +0.0030 | -383.272761   | -383.270259   | -383.270568   |

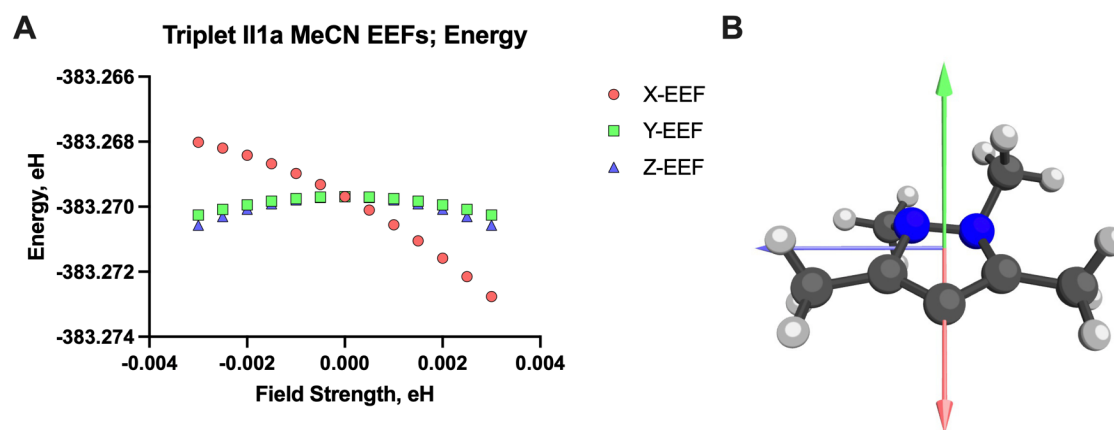

Figure S21.  ${}^3\text{II}_{1a}$  Energy under EEFs in MeCN. Axis definitions given in (B).

Table S20.  ${}^3\text{II}_{1a}$  Under EEFs in SMD Water. Energy given in Hartree.

| Field   | Energy, X-EEF | Energy, Y-EEF | Energy, Z-EEF |
|---------|---------------|---------------|---------------|
| -0.0030 | -383.261106   | -383.263379   | -383.263686   |
| -0.0025 | -383.261291   | -383.263202   | -383.263415   |
| -0.0020 | -383.261514   | -383.263057   | -383.263194   |
| -0.0015 | -383.261777   | -383.262945   | -383.263021   |
| -0.0010 | -383.262079   | -383.262864   | -383.262898   |
| -0.0005 | -383.262420   | -383.262816   | -383.262825   |
| +0.0000 | -383.262800   | -383.262800   | -383.262800   |
| +0.0005 | -383.263220   | -383.262816   | -383.262825   |
| +0.0010 | -383.263678   | -383.262864   | -383.262898   |
| +0.0015 | -383.264176   | -383.262945   | -383.263021   |
| +0.0020 | -383.264714   | -383.263057   | -383.263194   |
| +0.0025 | -383.265291   | -383.263202   | -383.263415   |
| +0.0030 | -383.265908   | -383.263379   | -383.263686   |

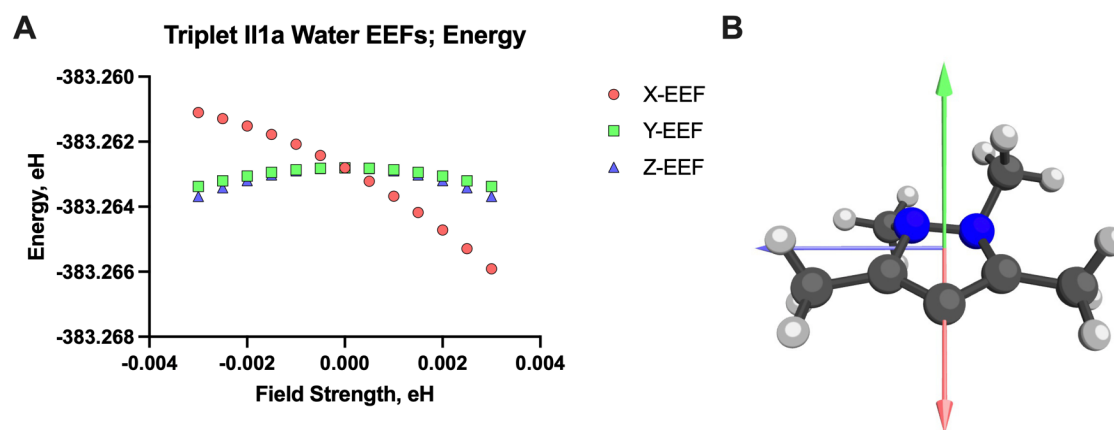

Figure S22.  ${}^3\text{II}_{1a}$  Energy under EEFs in Water. Axis definitions given in (B).

Table S21. III<sub>1a</sub> Under EEFs in Gas. Energy given in Hartree.

| Field   | Energy, X-EEF | Energy, Y-EEF | Energy, Z-EEF |
|---------|---------------|---------------|---------------|
| -0.0030 | -344.053960   | -344.060360   | -344.061350   |
| -0.0025 | -344.054920   | -344.060270   | -344.061070   |
| -0.0020 | -344.055900   | -344.060200   | -344.060810   |
| -0.0015 | -344.056900   | -344.060140   | -344.060580   |
| -0.0010 | -344.057930   | -344.060100   | -344.060390   |
| -0.0005 | -344.058990   | -344.060080   | -344.060210   |
| +0.0000 | -344.060070   | -344.060070   | -344.060070   |
| +0.0005 | -344.061170   | -344.060080   | -344.059950   |
| +0.0010 | -344.062300   | -344.060100   | -344.059870   |
| +0.0015 | -344.063460   | -344.060140   | -344.059800   |
| +0.0020 | -344.064640   | -344.060200   | -344.059770   |
| +0.0025 | -344.065840   | -344.060270   | -344.059770   |
| +0.0030 | -344.067070   | -344.060360   | -344.059790   |

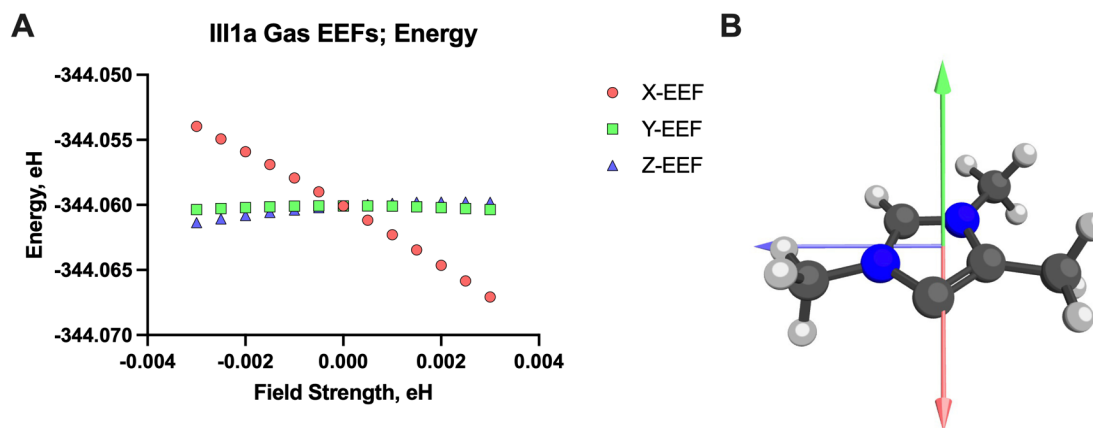

Figure S23. III<sub>1a</sub> Energy under EEFs in Gas. Axis definitions given in (B).

Table S22. III<sub>1a</sub> Under EEFs in SMD Toluene. Energy given in Hartree.

| Field   | Energy, X-EEF | Energy, Y-EEF | Energy, Z-EEF |
|---------|---------------|---------------|---------------|
| -0.0030 | -344.072781   | -344.080615   | -344.081793   |
| -0.0025 | -344.073957   | -344.080513   | -344.081460   |
| -0.0020 | -344.075163   | -344.080429   | -344.081160   |
| -0.0015 | -344.076398   | -344.080364   | -344.080892   |
| -0.0010 | -344.077662   | -344.080317   | -344.080656   |
| -0.0005 | -344.078956   | -344.080289   | -344.080451   |
| +0.0000 | -344.080280   | -344.080280   | -344.080280   |
| +0.0005 | -344.081632   | -344.080289   | -344.080140   |
| +0.0010 | -344.083015   | -344.080317   | -344.080032   |
| +0.0015 | -344.084427   | -344.080363   | -344.079956   |
| +0.0020 | -344.085868   | -344.080428   | -344.079912   |
| +0.0025 | -344.087339   | -344.080512   | -344.079901   |
| +0.0030 | -344.088839   | -344.080615   | -344.079922   |

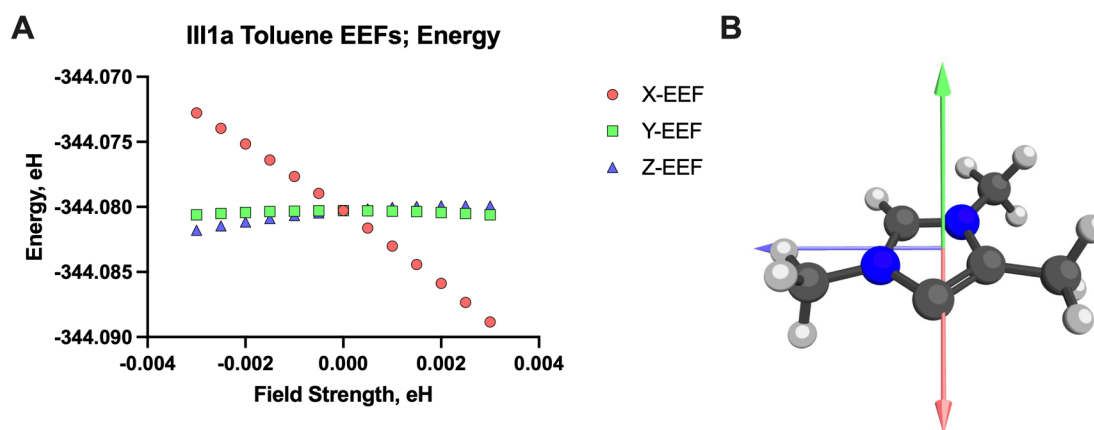

Figure S24. III<sub>1a</sub> Energy under EEFs in Toluene. Axis definitions given in (B).

Table S23. III<sub>1a</sub> Under EEFs in SMD Dichloromethane. Energy given in Hartree.

| Field   | Energy, X-EEF | Energy, Y-EEF | Energy, Z-EEF |
|---------|---------------|---------------|---------------|
| -0.0030 | -344.081754   | -344.091123   | -344.092466   |
| -0.0025 | -344.083164   | -344.091002   | -344.092086   |
| -0.0020 | -344.084608   | -344.090902   | -344.091743   |
| -0.0015 | -344.086086   | -344.090825   | -344.091435   |
| -0.0010 | -344.087598   | -344.090769   | -344.091162   |
| -0.0005 | -344.089144   | -344.090736   | -344.090926   |
| +0.0000 | -344.090725   | -344.090725   | -344.090725   |
| +0.0005 | -344.092340   | -344.090736   | -344.090560   |
| +0.0010 | -344.093989   | -344.090769   | -344.090431   |
| +0.0015 | -344.095673   | -344.090824   | -344.090337   |
| +0.0020 | -344.097391   | -344.090902   | -344.090279   |
| +0.0025 | -344.099144   | -344.091001   | -344.090258   |
| +0.0030 | -344.100931   | -344.091123   | -344.090272   |

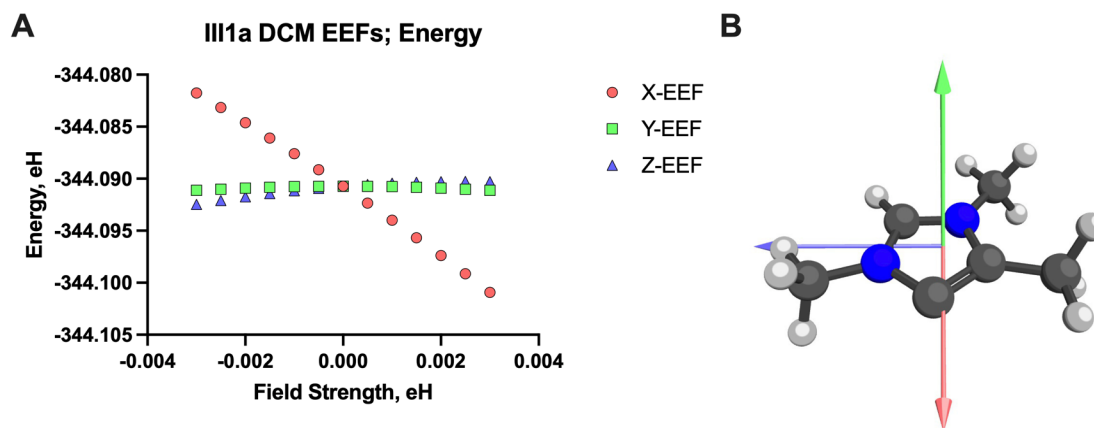

Figure S25. III<sub>1a</sub> Energy under EEFs in DCM. Axis definitions given in (B).

Table S24. III<sub>1a</sub> Under EEFs in SMD Acetonitrile. Energy given in Hartree.

| Field   | Energy, X-EEF | Energy, Y-EEF | Energy, Z-EEF |
|---------|---------------|---------------|---------------|
| -0.0030 | -344.083408   | -344.093415   | -344.094815   |
| -0.0025 | -344.084914   | -344.093284   | -344.094417   |
| -0.0020 | -344.086456   | -344.093176   | -344.094057   |
| -0.0015 | -344.088034   | -344.093093   | -344.093733   |
| -0.0010 | -344.089648   | -344.093033   | -344.093447   |
| -0.0005 | -344.091299   | -344.092998   | -344.093198   |
| +0.0000 | -344.092986   | -344.092986   | -344.092986   |
| +0.0005 | -344.094709   | -344.092998   | -344.092811   |
| +0.0010 | -344.096468   | -344.093033   | -344.092673   |
| +0.0015 | -344.098264   | -344.093093   | -344.092572   |
| +0.0020 | -344.100097   | -344.093176   | -344.092508   |
| +0.0025 | -344.101966   | -344.093283   | -344.092481   |
| +0.0030 | -344.103871   | -344.093415   | -344.092492   |

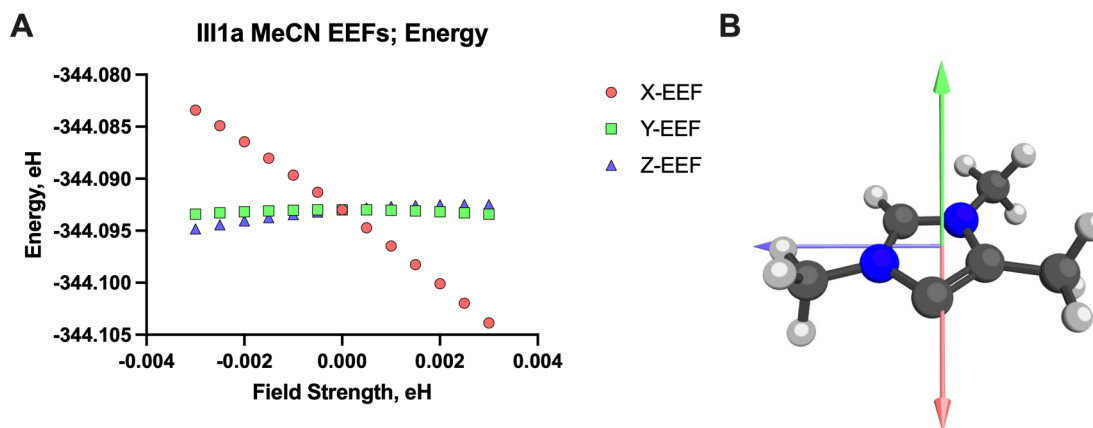

Figure S26. III<sub>1a</sub> Energy under EEFs in MeCN. Axis definitions given in (B).



Table S25. III<sub>1a</sub> Under EEFs in SMD Water. Energy given in Hartree.

| Field   | Energy, X-EEF | Energy, Y-EEF | Energy, Z-EEF |
|---------|---------------|---------------|---------------|
| -0.0030 | -344.071019   | -344.081158   | -344.082569   |
| -0.0025 | -344.072545   | -344.081025   | -344.082168   |
| -0.0020 | -344.074107   | -344.080916   | -344.081804   |
| -0.0015 | -344.075706   | -344.080831   | -344.081477   |
| -0.0010 | -344.077341   | -344.080770   | -344.081188   |
| -0.0005 | -344.079013   | -344.080734   | -344.080936   |
| +0.0000 | -344.080722   | -344.080722   | -344.080722   |
| +0.0005 | -344.082468   | -344.080734   | -344.080545   |
| +0.0010 | -344.084250   | -344.080770   | -344.080405   |
| +0.0015 | -344.086069   | -344.080831   | -344.080303   |
| +0.0020 | -344.087925   | -344.080916   | -344.080238   |
| +0.0025 | -344.089818   | -344.081025   | -344.080210   |
| +0.0030 | -344.091748   | -344.081158   | -344.080220   |

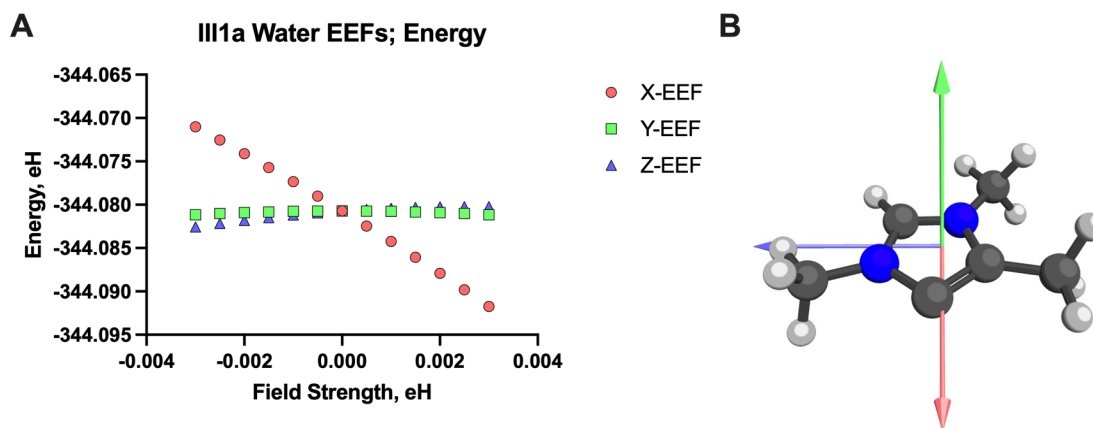

Figure S27. III<sub>1a</sub> Energy under EEFs in Water. Axis definitions given in (B).

Table S26.  $^3\text{III}_{1a}$  Under EEFs in Gas. Energy given in Hartree.

| Field   | Energy, X-EEF | Energy, Y-EEF | Energy, Z-EEF |
|---------|---------------|---------------|---------------|
| -0.0030 | -343.957880   | -343.958870   | -343.957190   |
| -0.0025 | -343.957790   | -343.958630   | -343.957210   |
| -0.0020 | -343.957730   | -343.958410   | -343.957250   |
| -0.0015 | -343.957690   | -343.958210   | -343.957330   |
| -0.0010 | -343.957680   | -343.958030   | -343.957430   |
| -0.0005 | -343.957690   | -343.957870   | -343.957570   |
| +0.0000 | -343.957730   | -343.957730   | -343.957730   |
| +0.0005 | -343.957790   | -343.957600   | -343.957920   |
| +0.0010 | -343.957880   | -343.957500   | -343.958140   |
| +0.0015 | -343.958000   | -343.957410   | -343.958390   |
| +0.0020 | -343.958140   | -343.957350   | -343.958660   |
| +0.0025 | -343.958310   | -343.957300   | -343.958970   |
| +0.0030 | -343.958500   | -343.957270   | -343.959300   |

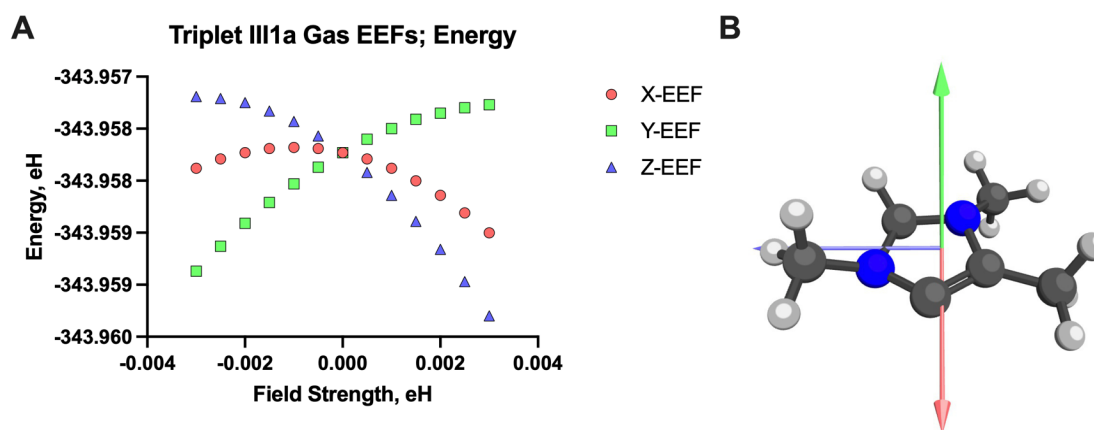

Figure S28.  $^3\text{III}_{1a}$  Energy under EEFs in Gas. Axis definitions given in (B).

Table S27.  ${}^3\text{III}_{1a}$  Under EEFs in SMD Toluene. Energy given in Hartree.

| Field   | Energy, X-EEF | Energy, Y-EEF | Energy, Z-EEF |
|---------|---------------|---------------|---------------|
| -0.0030 | -343.969539   | -343.970753   | -343.968655   |
| -0.0025 | -343.969434   | -343.970468   | -343.968691   |
| -0.0020 | -343.969361   | -343.970205   | -343.968761   |
| -0.0015 | -343.969318   | -343.969964   | -343.968864   |
| -0.0010 | -343.969306   | -343.969746   | -343.969001   |
| -0.0005 | -343.969325   | -343.969550   | -343.969172   |
| +0.0000 | -343.969376   | -343.969376   | -343.969376   |
| +0.0005 | -343.969457   | -343.969224   | -343.969613   |
| +0.0010 | -343.969570   | -343.969094   | -343.969884   |
| +0.0015 | -343.969714   | -343.968987   | -343.970189   |
| +0.0020 | -343.969890   | -343.968902   | -343.970527   |
| +0.0025 | -343.970097   | -343.968839   | -343.970900   |
| +0.0030 | -343.970337   | -343.968799   | -343.971305   |

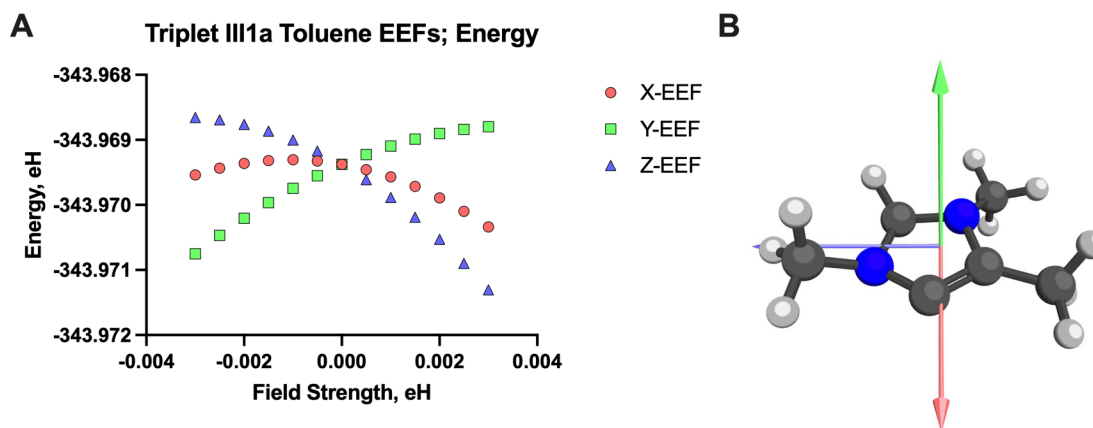

Figure S29.  ${}^3\text{III}_{1a}$  Energy under EEFs in Toluene. Axis definitions given in (B).

Table S28.  $^3\text{III}_{1a}$  Under EEFs in SMD Dichloromethane. Energy given in Hartree.

| Field   | Energy, X-EEF | Energy, Y-EEF | Energy, Z-EEF |
|---------|---------------|---------------|---------------|
| -0.0030 | -343.972307   | -343.973797   | -343.971192   |
| -0.0025 | -343.972182   | -343.973447   | -343.971250   |
| -0.0020 | -343.972093   | -343.973125   | -343.971345   |
| -0.0015 | -343.972040   | -343.972829   | -343.971478   |
| -0.0010 | -343.972025   | -343.972561   | -343.971649   |
| -0.0005 | -343.972046   | -343.972320   | -343.971858   |
| +0.0000 | -343.972105   | -343.972105   | -343.972105   |
| +0.0005 | -343.972201   | -343.971917   | -343.972390   |
| +0.0010 | -343.972334   | -343.971756   | -343.972712   |
| +0.0015 | -343.972505   | -343.971621   | -343.973072   |
| +0.0020 | -343.972714   | -343.971513   | -343.973471   |
| +0.0025 | -343.972962   | -343.971431   | -343.973907   |
| +0.0030 | -343.973249   | -343.971376   | -343.974382   |

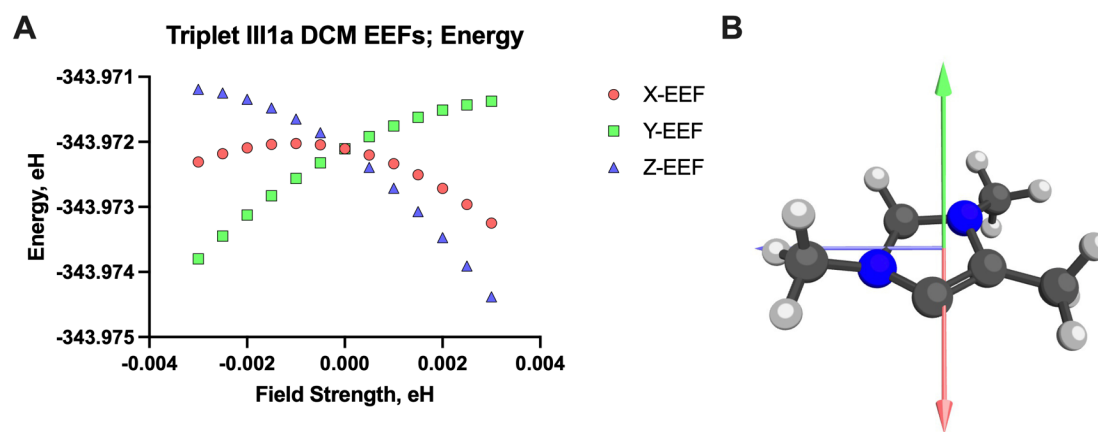

Figure S30.  $^3\text{III}_{1a}$  Energy under EEFs in DCM. Axis definitions given in (B).

Table S29.  $^3\text{III}_{1a}$  Under EEFs in SMD Acetonitrile. Energy given in Hartree.

| Field   | Energy, X-EEF | Energy, Y-EEF | Energy, Z-EEF |
|---------|---------------|---------------|---------------|
| -0.0030 | -343.971506   | -343.973126   | -343.970285   |
| -0.0025 | -343.971370   | -343.972744   | -343.970351   |
| -0.0020 | -343.971273   | -343.972392   | -343.970457   |
| -0.0015 | -343.971215   | -343.972069   | -343.970603   |
| -0.0010 | -343.971196   | -343.971776   | -343.970788   |
| -0.0005 | -343.971216   | -343.971512   | -343.971013   |
| +0.0000 | -343.971277   | -343.971277   | -343.971277   |
| +0.0005 | -343.971377   | -343.971071   | -343.971580   |
| +0.0010 | -343.971517   | -343.970894   | -343.971923   |
| +0.0015 | -343.971698   | -343.970745   | -343.972306   |
| +0.0020 | -343.971920   | -343.970626   | -343.972728   |
| +0.0025 | -343.972183   | -343.970535   | -343.973190   |
| +0.0030 | -343.972490   | -343.970474   | -343.973691   |

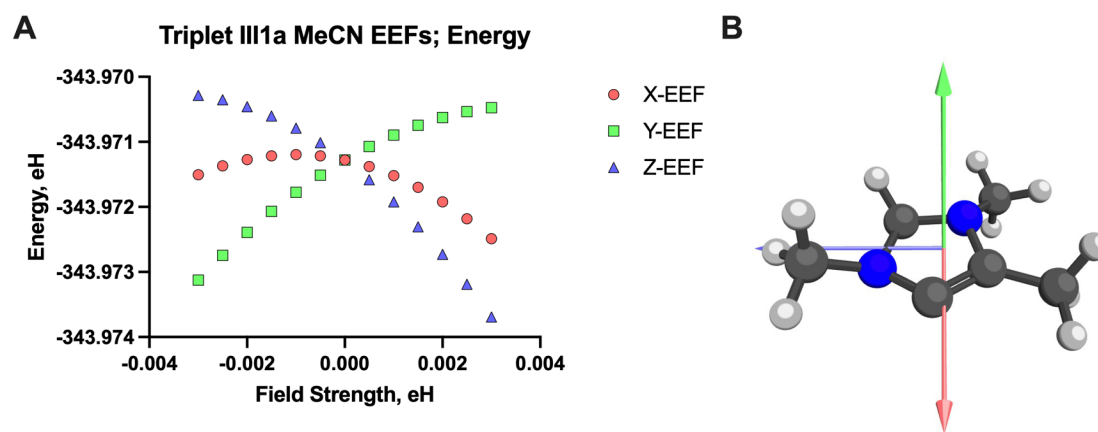

Figure S31.  $^3\text{III}_{1a}$  Energy under EEFs in MeCN. Axis definitions given in (B).

Table S30.  $^3\text{III}_{1a}$  Under EEFs in SMD Water. Energy given in Hartree.

| Field   | Energy, X-EEF | Energy, Y-EEF | Energy, Z-EEF |
|---------|---------------|---------------|---------------|
| -0.0030 | -343.960505   | -343.962154   | -343.959261   |
| -0.0025 | -343.960367   | -343.961765   | -343.959329   |
| -0.0020 | -343.960268   | -343.961406   | -343.959438   |
| -0.0015 | -343.960208   | -343.961077   | -343.959586   |
| -0.0010 | -343.960189   | -343.960778   | -343.959774   |
| -0.0005 | -343.960209   | -343.960509   | -343.960002   |
| +0.0000 | -343.960269   | -343.960269   | -343.960269   |
| +0.0005 | -343.960370   | -343.960059   | -343.960577   |
| +0.0010 | -343.960512   | -343.959879   | -343.960924   |
| +0.0015 | -343.960694   | -343.959727   | -343.961311   |
| +0.0020 | -343.960919   | -343.959606   | -343.961738   |
| +0.0025 | -343.961186   | -343.959513   | -343.962205   |
| +0.0030 | -343.961496   | -343.959450   | -343.962712   |

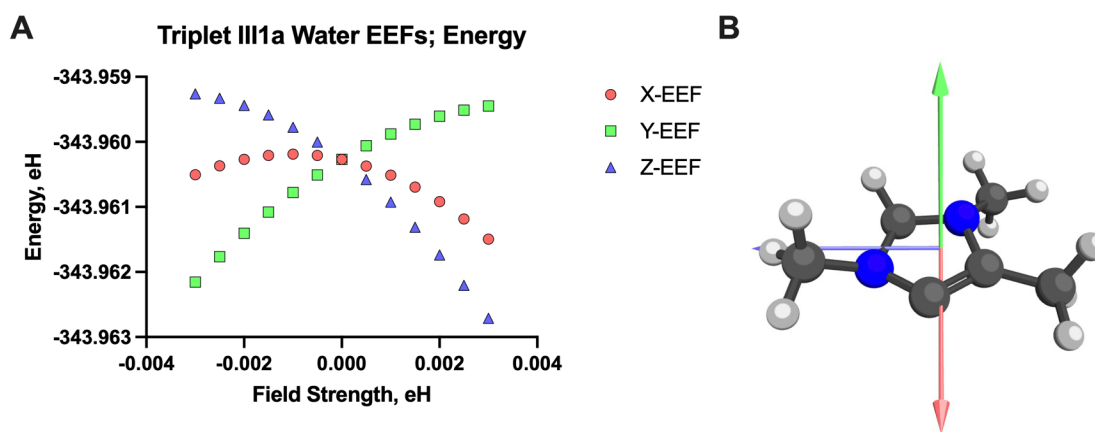

Figure S32.  $^3\text{III}_{1a}$  Energy under EEFs in Water. Axis definitions given in (B).

Table S31. IV<sub>1a</sub> Under EEFs in Gas. Energy given in Hartree.

| Field   | Energy, X-EEF | Energy, Y-EEF | Energy, Z-EEF |
|---------|---------------|---------------|---------------|
| -0.0030 | -285.324170   | -285.327970   | -285.324870   |
| -0.0025 | -285.324730   | -285.327920   | -285.325310   |
| -0.0020 | -285.325310   | -285.327870   | -285.325770   |
| -0.0015 | -285.325900   | -285.327830   | -285.326250   |
| -0.0010 | -285.326520   | -285.327800   | -285.326750   |
| -0.0005 | -285.327140   | -285.327790   | -285.327260   |
| +0.0000 | -285.327780   | -285.327780   | -285.327780   |
| +0.0005 | -285.328440   | -285.327790   | -285.328330   |
| +0.0010 | -285.329110   | -285.327800   | -285.328890   |
| +0.0015 | -285.329800   | -285.327830   | -285.329470   |
| +0.0020 | -285.330510   | -285.327870   | -285.330060   |
| +0.0025 | -285.331230   | -285.327920   | -285.330670   |
| +0.0030 | -285.331970   | -285.327970   | -285.331300   |

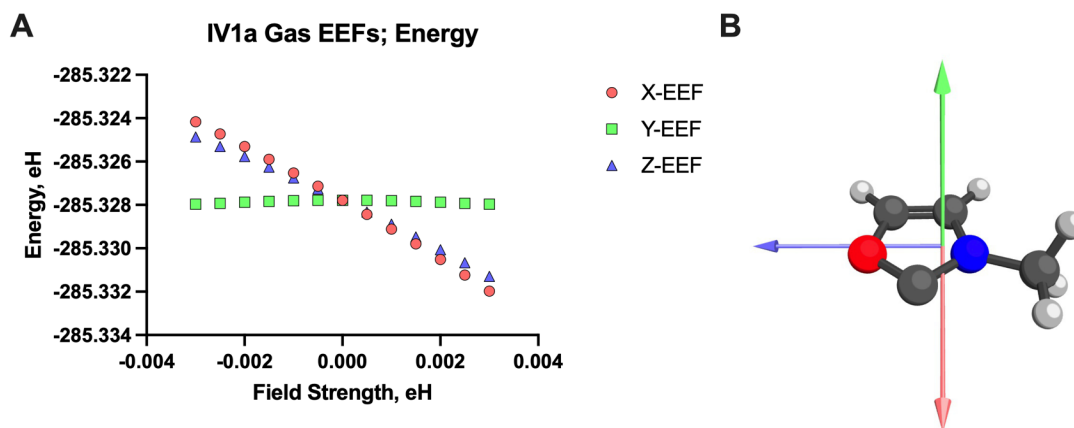

Figure S33. IV<sub>1a</sub> Energy under EEFs in Gas. Axis definitions given in (B).

Table S32. IV<sub>1a</sub> Under EEFs in SMD Toluene. Energy given in Hartree.

| Field   | Energy, X-EEF | Energy, Y-EEF | Energy, Z-EEF |
|---------|---------------|---------------|---------------|
| -0.0030 | -285.331779   | -285.336274   | -285.332671   |
| -0.0025 | -285.332446   | -285.336208   | -285.333188   |
| -0.0020 | -285.333132   | -285.336154   | -285.333723   |
| -0.0015 | -285.333835   | -285.336112   | -285.334278   |
| -0.0010 | -285.334558   | -285.336081   | -285.334852   |
| -0.0005 | -285.335298   | -285.336063   | -285.335445   |
| +0.0000 | -285.336057   | -285.336057   | -285.336057   |
| +0.0005 | -285.336835   | -285.336063   | -285.336689   |
| +0.0010 | -285.337630   | -285.336081   | -285.337339   |
| +0.0015 | -285.338445   | -285.336111   | -285.338009   |
| +0.0020 | -285.339277   | -285.336153   | -285.338698   |
| +0.0025 | -285.340129   | -285.336208   | -285.339406   |
| +0.0030 | -285.340998   | -285.336274   | -285.340133   |

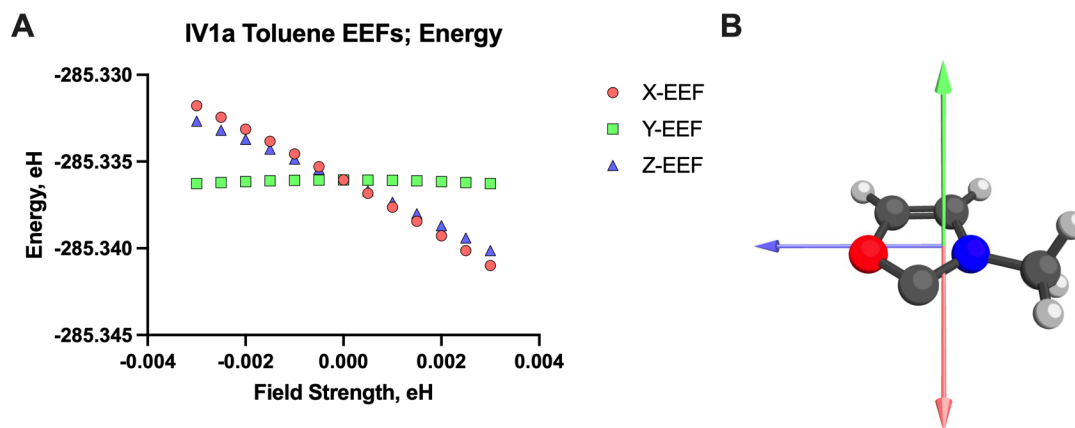

Figure S34. IV<sub>1a</sub> Energy under EEFs in Toluene. Axis definitions given in (B).



Table S33. IV<sub>1a</sub> Under EEFs in SMD Dichloromethane. Energy given in Hartree.

| Field   | Energy, X-EEF | Energy, Y-EEF | Energy, Z-EEF |
|---------|---------------|---------------|---------------|
| -0.0030 | -285.336482   | -285.341712   | -285.337658   |
| -0.0025 | -285.337259   | -285.341636   | -285.338239   |
| -0.0020 | -285.338057   | -285.341573   | -285.338841   |
| -0.0015 | -285.338877   | -285.341525   | -285.339464   |
| -0.0010 | -285.339717   | -285.341490   | -285.340108   |
| -0.0005 | -285.340579   | -285.341469   | -285.340774   |
| +0.0000 | -285.341462   | -285.341462   | -285.341462   |
| +0.0005 | -285.342366   | -285.341469   | -285.342171   |
| +0.0010 | -285.343292   | -285.341490   | -285.342901   |
| +0.0015 | -285.344238   | -285.341524   | -285.343653   |
| +0.0020 | -285.345207   | -285.341573   | -285.344426   |
| +0.0025 | -285.346196   | -285.341635   | -285.345220   |
| +0.0030 | -285.347207   | -285.341712   | -285.346036   |

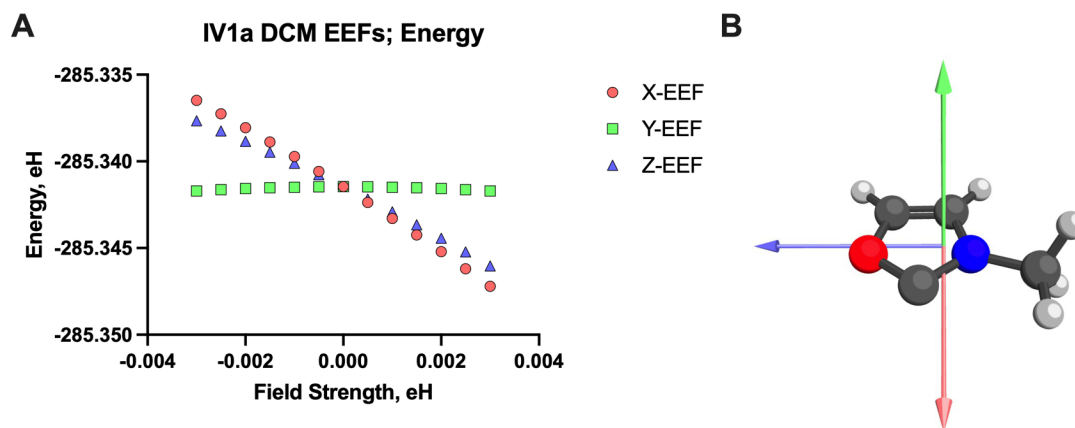

Figure S35. IV<sub>1a</sub> Energy under EEFs in DCM. Axis definitions given in (B).

Table S34. IV<sub>1a</sub> Under EEFs in SMD Acetonitrile. Energy given in Hartree.

| Field   | Energy, X-EEF | Energy, Y-EEF | Energy, Z-EEF |
|---------|---------------|---------------|---------------|
| -0.0030 | -285.337325   | -285.342832   | -285.338627   |
| -0.0025 | -285.338143   | -285.342752   | -285.339229   |
| -0.0020 | -285.338983   | -285.342685   | -285.339852   |
| -0.0015 | -285.339846   | -285.342634   | -285.340498   |
| -0.0010 | -285.340731   | -285.342597   | -285.341166   |
| -0.0005 | -285.341638   | -285.342575   | -285.341856   |
| +0.0000 | -285.342568   | -285.342568   | -285.342568   |
| +0.0005 | -285.343520   | -285.342575   | -285.343302   |
| +0.0010 | -285.344494   | -285.342597   | -285.344058   |
| +0.0015 | -285.345491   | -285.342634   | -285.344836   |
| +0.0020 | -285.346510   | -285.342685   | -285.345637   |
| +0.0025 | -285.347552   | -285.342751   | -285.346459   |
| +0.0030 | -285.348617   | -285.342832   | -285.347304   |

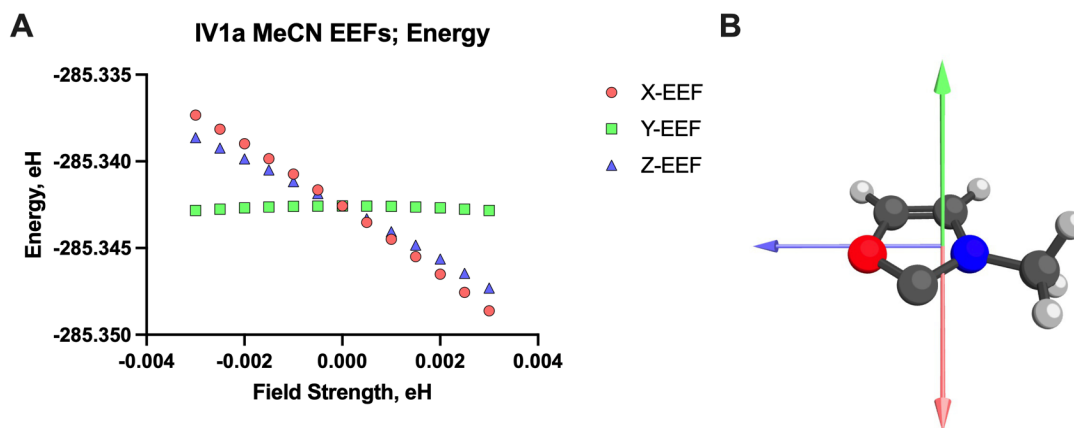

Figure S36. IV<sub>1a</sub> Energy under EEFs in MeCN. Axis definitions given in (B).

Table S35. IV<sub>1a</sub> Under EEFs in SMD Water. Energy given in Hartree.

| Field   | Energy, X-EEF | Energy, Y-EEF | Energy, Z-EEF |
|---------|---------------|---------------|---------------|
| -0.0030 | -285.329471   | -285.335099   | -285.330738   |
| -0.0025 | -285.330308   | -285.335016   | -285.331362   |
| -0.0020 | -285.331167   | -285.334949   | -285.332009   |
| -0.0015 | -285.332048   | -285.334896   | -285.332679   |
| -0.0010 | -285.332952   | -285.334858   | -285.333372   |
| -0.0005 | -285.333879   | -285.334835   | -285.334089   |
| +0.0000 | -285.334828   | -285.334828   | -285.334828   |
| +0.0005 | -285.335800   | -285.334835   | -285.335590   |
| +0.0010 | -285.336794   | -285.334858   | -285.336376   |
| +0.0015 | -285.337812   | -285.334895   | -285.337184   |
| +0.0020 | -285.338852   | -285.334948   | -285.338015   |
| +0.0025 | -285.339915   | -285.335016   | -285.338870   |
| +0.0030 | -285.341001   | -285.335099   | -285.339748   |

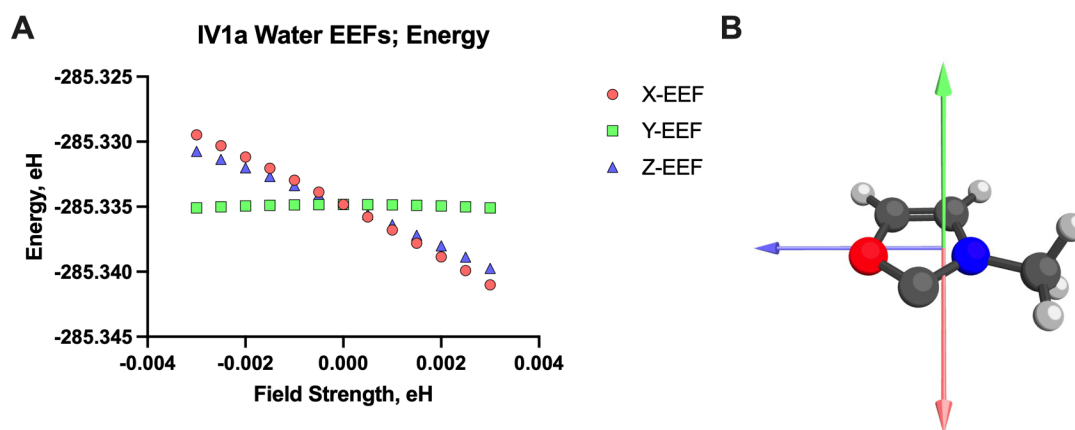

Figure S37. IV<sub>1a</sub> Energy under EEFs in Water. Axis definitions given in (B).

Table S36.  $^3IV_{1a}$  Under EEFs in Gas. Energy given in Hartree.

| Field   | Energy, X-EEF | Energy, Y-EEF | Energy, Z-EEF |
|---------|---------------|---------------|---------------|
| -0.0030 | -285.199380   | -285.202250   | -285.199620   |
| -0.0025 | -285.199620   | -285.202010   | -285.199810   |
| -0.0020 | -285.199880   | -285.201800   | -285.200020   |
| -0.0015 | -285.200150   | -285.201590   | -285.200250   |
| -0.0010 | -285.200430   | -285.201400   | -285.200500   |
| -0.0005 | -285.200730   | -285.201210   | -285.200770   |
| +0.0000 | -285.201050   | -285.201050   | -285.201050   |
| +0.0005 | -285.201370   | -285.200890   | -285.201340   |
| +0.0010 | -285.201720   | -285.200750   | -285.201660   |
| +0.0015 | -285.202080   | -285.200610   | -285.201990   |
| +0.0020 | -285.202450   | -285.200500   | -285.202330   |
| +0.0025 | -285.202840   | -285.200390   | -285.202700   |
| +0.0030 | -285.203240   | -285.200300   | -285.203080   |

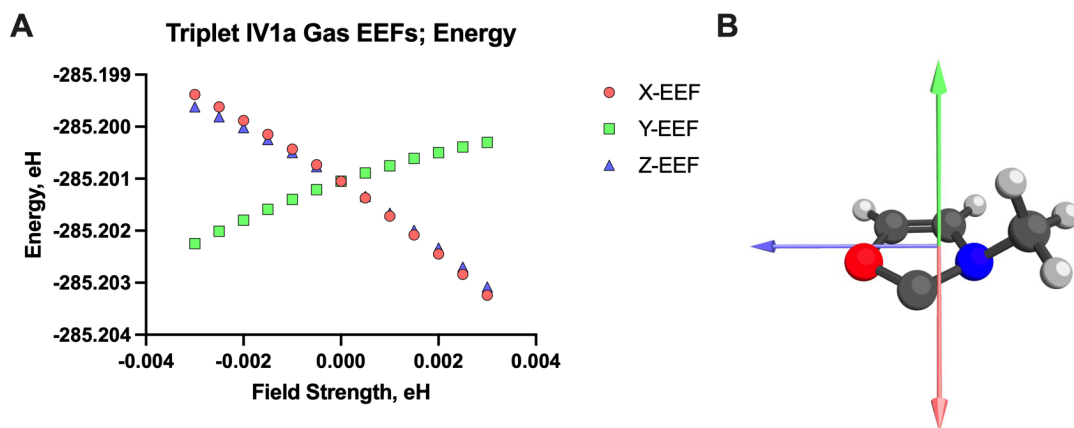

Figure S38.  $^3IV_{1a}$  Energy under EEFs in Gas. Axis definitions given in (B).

Table S37.  $^3IV_{1a}$  Under EEFs in SMD Toluene. Energy given in Hartree.

| Field   | Energy, X-EEF | Energy, Y-EEF | Energy, Z-EEF |
|---------|---------------|---------------|---------------|
| -0.0030 | -285.203386   | -285.206747   | -285.203683   |
| -0.0025 | -285.203668   | -285.206476   | -285.203909   |
| -0.0020 | -285.203967   | -285.206219   | -285.204155   |
| -0.0015 | -285.204283   | -285.205976   | -285.204421   |
| -0.0010 | -285.204616   | -285.205747   | -285.204706   |
| -0.0005 | -285.204966   | -285.205533   | -285.205010   |
| +0.0000 | -285.205333   | -285.205333   | -285.205333   |
| +0.0005 | -285.205718   | -285.205148   | -285.205676   |
| +0.0010 | -285.206119   | -285.204976   | -285.206038   |
| +0.0015 | -285.206538   | -285.204820   | -285.206419   |
| +0.0020 | -285.206975   | -285.204677   | -285.206820   |
| +0.0025 | -285.207428   | -285.204550   | -285.207239   |
| +0.0030 | -285.207899   | -285.204437   | -285.207678   |

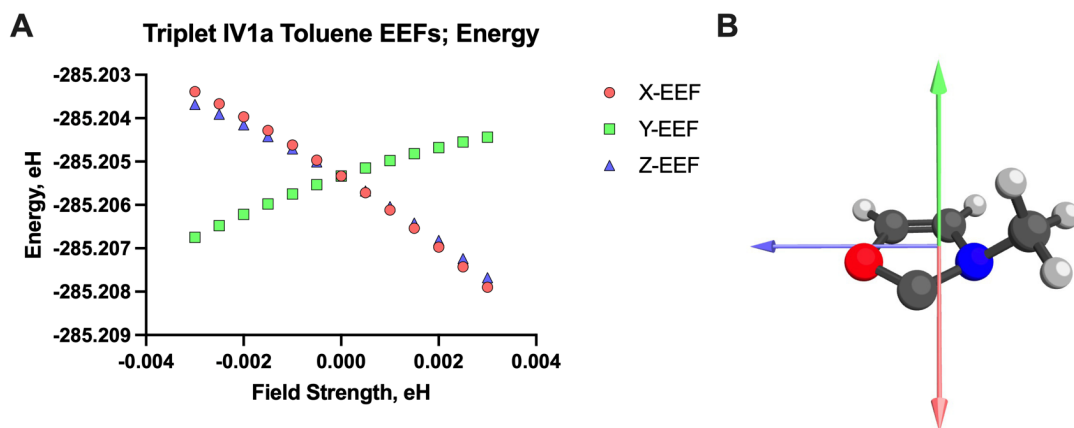

Figure S39.  $^3IV_{1a}$  Energy under EEFs in Toluene. Axis definitions given in (B).

Table S38.  $^3IV_{1a}$  Under EEFs in SMD Dichloromethane. Energy given in Hartree.

| Field   | Energy, X-EEF | Energy, Y-EEF | Energy, Z-EEF |
|---------|---------------|---------------|---------------|
| -0.0030 | -285.205387   | -285.209258   | -285.205786   |
| -0.0025 | -285.205711   | -285.208944   | -285.206037   |
| -0.0020 | -285.206053   | -285.208646   | -285.206311   |
| -0.0015 | -285.206416   | -285.208365   | -285.206606   |
| -0.0010 | -285.206798   | -285.208101   | -285.206922   |
| -0.0005 | -285.207200   | -285.207853   | -285.207261   |
| +0.0000 | -285.207621   | -285.207621   | -285.207621   |
| +0.0005 | -285.208062   | -285.207406   | -285.208003   |
| +0.0010 | -285.208523   | -285.207208   | -285.208407   |
| +0.0015 | -285.209004   | -285.207026   | -285.208832   |
| +0.0020 | -285.209505   | -285.206861   | -285.209279   |
| +0.0025 | -285.210026   | -285.206713   | -285.209748   |
| +0.0030 | -285.210566   | -285.206582   | -285.210239   |

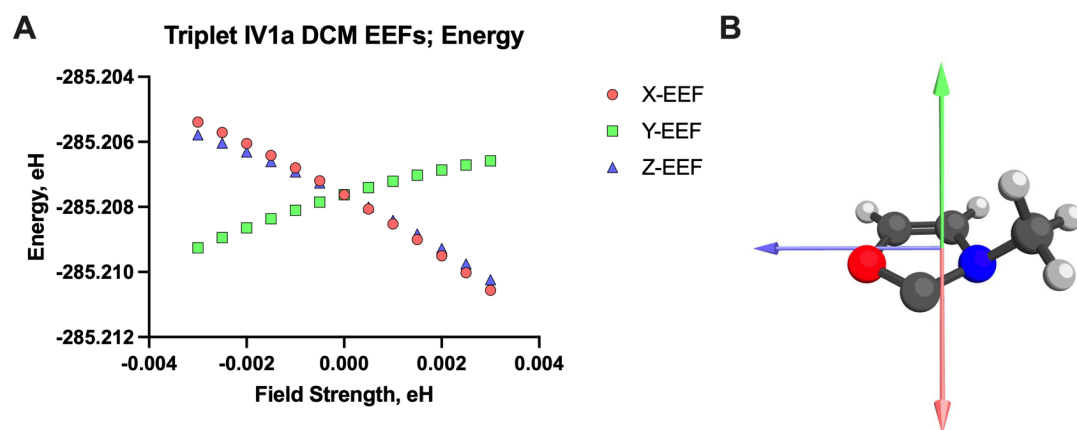

Figure S40.  $^3IV_{1a}$  Energy under EEFs in DCM. Axis definitions given in (B).

Table S39.  ${}^3IV_{1a}$  Under EEFs in SMD Acetonitrile. Energy given in Hartree.

| Field   | Energy, X-EEF | Energy, Y-EEF | Energy, Z-EEF |
|---------|---------------|---------------|---------------|
| -0.0030 | -285.205254   | -285.209321   | -285.205705   |
| -0.0025 | -285.205592   | -285.208989   | -285.205963   |
| -0.0020 | -285.205951   | -285.208674   | -285.206243   |
| -0.0015 | -285.206330   | -285.208377   | -285.206547   |
| -0.0010 | -285.206730   | -285.208098   | -285.206872   |
| -0.0005 | -285.207150   | -285.207836   | -285.207220   |
| +0.0000 | -285.207591   | -285.207591   | -285.207591   |
| +0.0005 | -285.208053   | -285.207364   | -285.207985   |
| +0.0010 | -285.208536   | -285.207155   | -285.208400   |
| +0.0015 | -285.209039   | -285.206963   | -285.208839   |
| +0.0020 | -285.209564   | -285.206789   | -285.209299   |
| +0.0025 | -285.210110   | -285.206633   | -285.209783   |
| +0.0030 | -285.210677   | -285.206494   | -285.210288   |

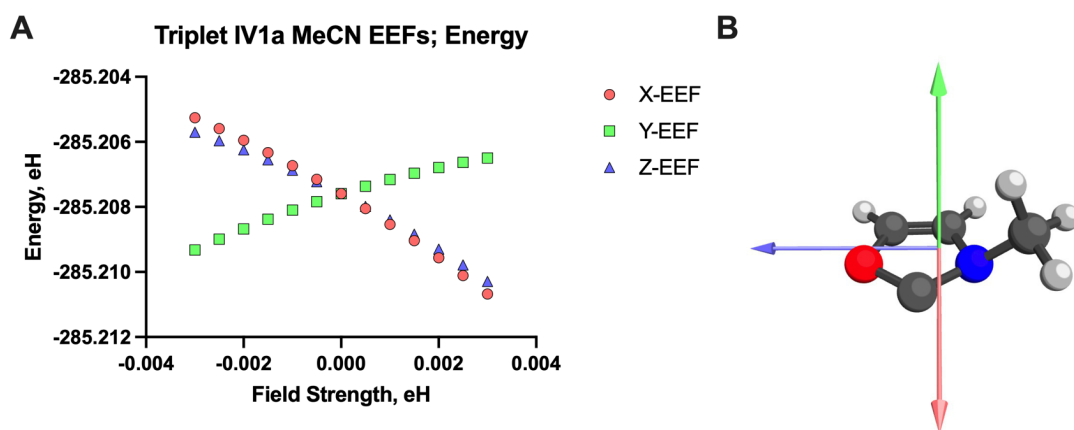

Figure S41.  ${}^3IV_{1a}$  Energy under EEFs in MeCN. Axis definitions given in (B).

Table S40.  ${}^3\text{IV}_{1a}$  Under EEFs in SMD Water. Energy given in Hartree.

| Field   | Energy, X-EEF | Energy, Y-EEF | Energy, Z-EEF |
|---------|---------------|---------------|---------------|
| -0.0030 | -285.199594   | -285.203752   | -285.199959   |
| -0.0025 | -285.199943   | -285.203416   | -285.200240   |
| -0.0020 | -285.200313   | -285.203097   | -285.200545   |
| -0.0015 | -285.200703   | -285.202796   | -285.200873   |
| -0.0010 | -285.201115   | -285.202513   | -285.201225   |
| -0.0005 | -285.201547   | -285.202248   | -285.201601   |
| +0.0000 | -285.202000   | -285.202000   | -285.202000   |
| +0.0005 | -285.202474   | -285.201770   | -285.202422   |
| +0.0010 | -285.202969   | -285.201558   | -285.202868   |
| +0.0015 | -285.203486   | -285.201364   | -285.203338   |
| +0.0020 | -285.204023   | -285.201188   | -285.203830   |
| +0.0025 | -285.204582   | -285.201030   | -285.204346   |
| +0.0030 | -285.205163   | -285.200890   | -285.204886   |

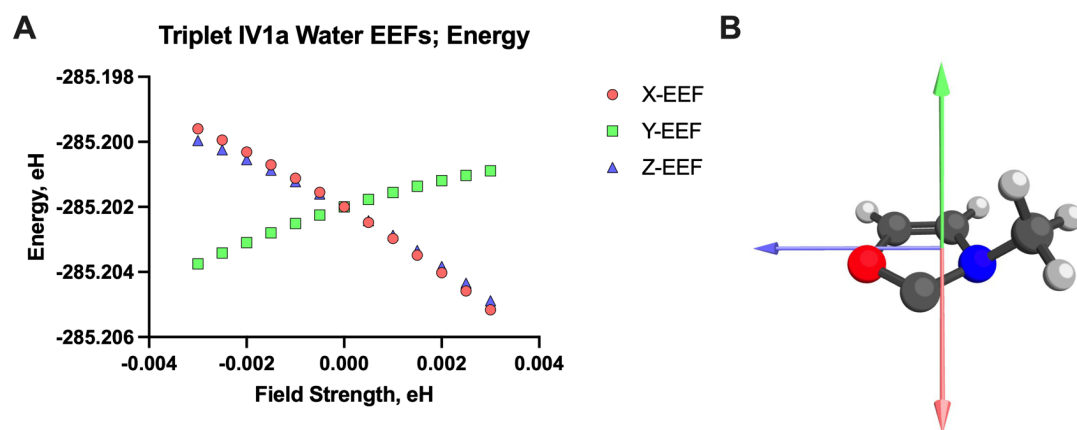

Figure S42.  ${}^3\text{IV}_{1a}$  Energy under EEFs in Water. Axis definitions given in (B).



Table S41.  $V_{1a}$  Under EEFs in Gas. Energy given in Hartree.

| Field   | Energy, X-EEF | Energy, Y-EEF | Energy, Z-EEF |
|---------|---------------|---------------|---------------|
| -0.0030 | -608.300800   | -608.304300   | -608.301800   |
| -0.0025 | -608.301300   | -608.304230   | -608.302120   |
| -0.0020 | -608.301820   | -608.304170   | -608.302470   |
| -0.0015 | -608.302350   | -608.304130   | -608.302830   |
| -0.0010 | -608.302900   | -608.304100   | -608.303220   |
| -0.0005 | -608.303480   | -608.304080   | -608.303640   |
| +0.0000 | -608.304070   | -608.304070   | -608.304070   |
| +0.0005 | -608.304680   | -608.304080   | -608.304530   |
| +0.0010 | -608.305320   | -608.304100   | -608.305010   |
| +0.0015 | -608.305970   | -608.304130   | -608.305510   |
| +0.0020 | -608.306640   | -608.304170   | -608.306040   |
| +0.0025 | -608.307330   | -608.304230   | -608.306590   |
| +0.0030 | -608.308040   | -608.304300   | -608.307160   |

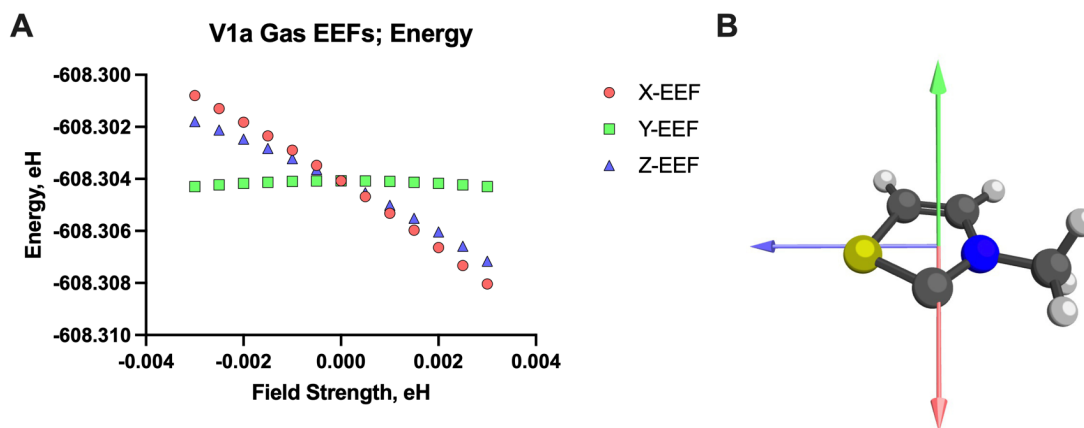

Figure S43.  $V_{1a}$  Energy under EEFs in Gas. Axis definitions given in (B).

Table S42.  $V_{1a}$  Under EEFs in SMD Toluene. Energy given in Hartree.

| Field   | Energy, X-EEF | Energy, Y-EEF | Energy, Z-EEF |
|---------|---------------|---------------|---------------|
| -0.0030 | -608.308696   | -608.312966   | -608.309960   |
| -0.0025 | -608.309305   | -608.312884   | -608.310351   |
| -0.0020 | -608.309938   | -608.312818   | -608.310769   |
| -0.0015 | -608.310594   | -608.312766   | -608.311212   |
| -0.0010 | -608.311273   | -608.312729   | -608.311682   |
| -0.0005 | -608.311975   | -608.312707   | -608.312177   |
| +0.0000 | -608.312699   | -608.312699   | -608.312699   |
| +0.0005 | -608.313447   | -608.312707   | -608.313248   |
| +0.0010 | -608.314218   | -608.312729   | -608.313822   |
| +0.0015 | -608.315012   | -608.312766   | -608.314423   |
| +0.0020 | -608.315830   | -608.312818   | -608.315050   |
| +0.0025 | -608.316670   | -608.312884   | -608.315704   |
| +0.0030 | -608.317533   | -608.312966   | -608.316384   |

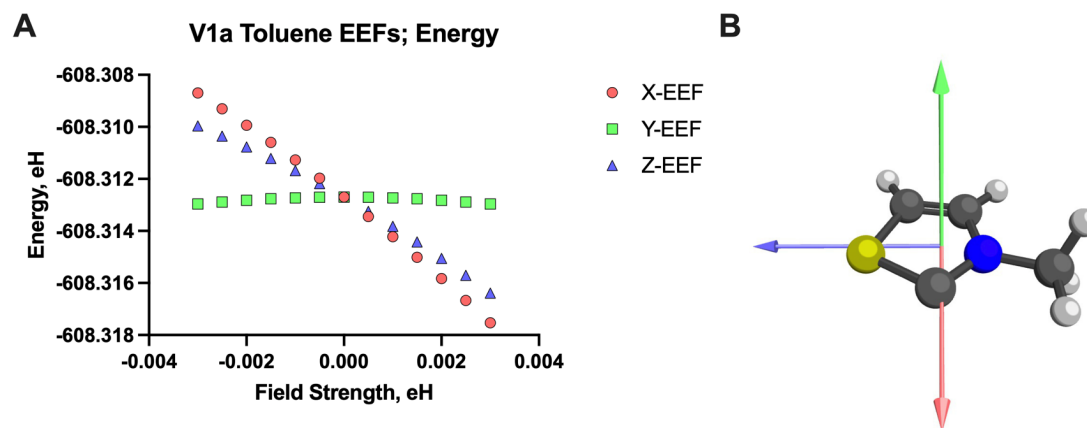

Figure S44.  $V_{1a}$  Energy under EEFs in Toluene. Axis definitions given in (B).

**Table S43.  $V_{1a}$  Under EEFs in SMD Dichloromethane.** Energy given in Hartree.

| Field   | Energy, X-EEF | Energy, Y-EEF | Energy, Z-EEF |
|---------|---------------|---------------|---------------|
| -0.0030 | -608.313102   | -608.318196   | -608.314766   |
| -0.0025 | -608.313832   | -608.318102   | -608.315213   |
| -0.0020 | -608.314589   | -608.318024   | -608.315689   |
| -0.0015 | -608.315373   | -608.317964   | -608.316194   |
| -0.0010 | -608.316184   | -608.317921   | -608.316729   |
| -0.0005 | -608.317022   | -608.317896   | -608.317293   |
| +0.0000 | -608.317887   | -608.317887   | -608.317887   |
| +0.0005 | -608.318779   | -608.317896   | -608.318510   |
| +0.0010 | -608.319698   | -608.317921   | -608.319163   |
| +0.0015 | -608.320644   | -608.317964   | -608.319845   |
| +0.0020 | -608.321618   | -608.318024   | -608.320557   |
| +0.0025 | -608.322618   | -608.318102   | -608.321299   |
| +0.0030 | -608.323646   | -608.318196   | -608.322070   |

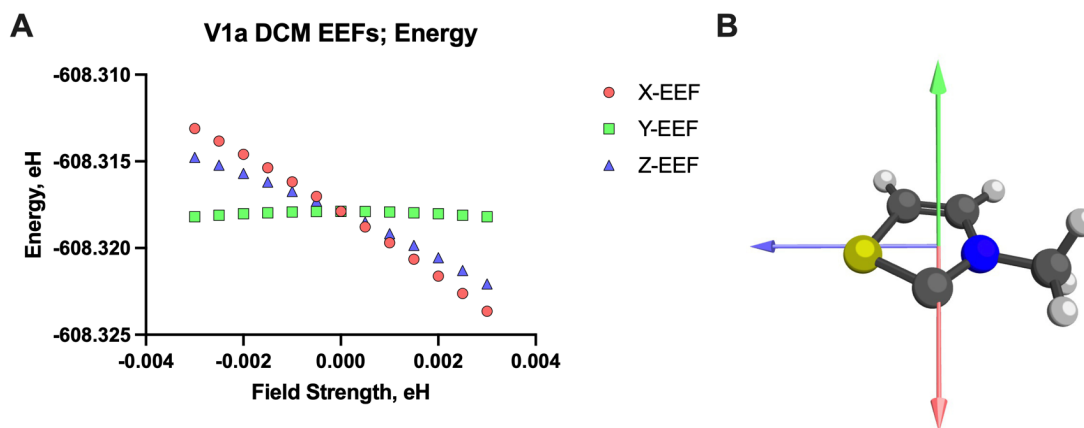

**Figure S45.  $V_{1a}$  Energy under EEFs in DCM.** Axis definitions given in (B).

Table S44.  $V_{1a}$  Under EEFs in SMD Acetonitrile. Energy given in Hartree.

| Field   | Energy, X-EEF | Energy, Y-EEF | Energy, Z-EEF |
|---------|---------------|---------------|---------------|
| -0.0030 | -608.313265   | -608.318699   | -608.315117   |
| -0.0025 | -608.314045   | -608.318599   | -608.315583   |
| -0.0020 | -608.314853   | -608.318517   | -608.316079   |
| -0.0015 | -608.315690   | -608.318453   | -608.316606   |
| -0.0010 | -608.316555   | -608.318407   | -608.317164   |
| -0.0005 | -608.317448   | -608.318380   | -608.317752   |
| +0.0000 | -608.318371   | -608.318371   | -608.318371   |
| +0.0005 | -608.319322   | -608.318380   | -608.319020   |
| +0.0010 | -608.320302   | -608.318407   | -608.319701   |
| +0.0015 | -608.321310   | -608.318453   | -608.320411   |
| +0.0020 | -608.322348   | -608.318517   | -608.321153   |
| +0.0025 | -608.323414   | -608.318599   | -608.321926   |
| +0.0030 | -608.324510   | -608.318699   | -608.322729   |

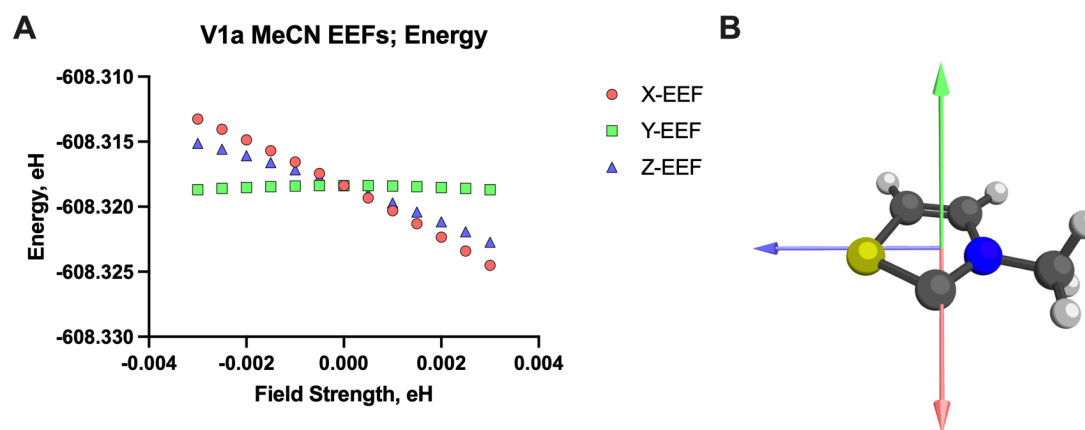

Figure S46.  $V_{1a}$  Energy under EEFs in MeCN. Axis definitions given in (B).

Table S45.  $V_{1a}$  Under EEFs in SMD Water. Energy given in Hartree.

| Field   | Energy, X-EEF | Energy, Y-EEF | Energy, Z-EEF |
|---------|---------------|---------------|---------------|
| -0.0030 | -608.305354   | -608.310858   | -608.307246   |
| -0.0025 | -608.306144   | -608.310757   | -608.307715   |
| -0.0020 | -608.306963   | -608.310674   | -608.308216   |
| -0.0015 | -608.307810   | -608.310609   | -608.308747   |
| -0.0010 | -608.308686   | -608.310563   | -608.309309   |
| -0.0005 | -608.309592   | -608.310535   | -608.309902   |
| +0.0000 | -608.310526   | -608.310526   | -608.310526   |
| +0.0005 | -608.311489   | -608.310535   | -608.311181   |
| +0.0010 | -608.312482   | -608.310563   | -608.311866   |
| +0.0015 | -608.313503   | -608.310609   | -608.312583   |
| +0.0020 | -608.314554   | -608.310674   | -608.313330   |
| +0.0025 | -608.315634   | -608.310757   | -608.314109   |
| +0.0030 | -608.316743   | -608.310858   | -608.314919   |

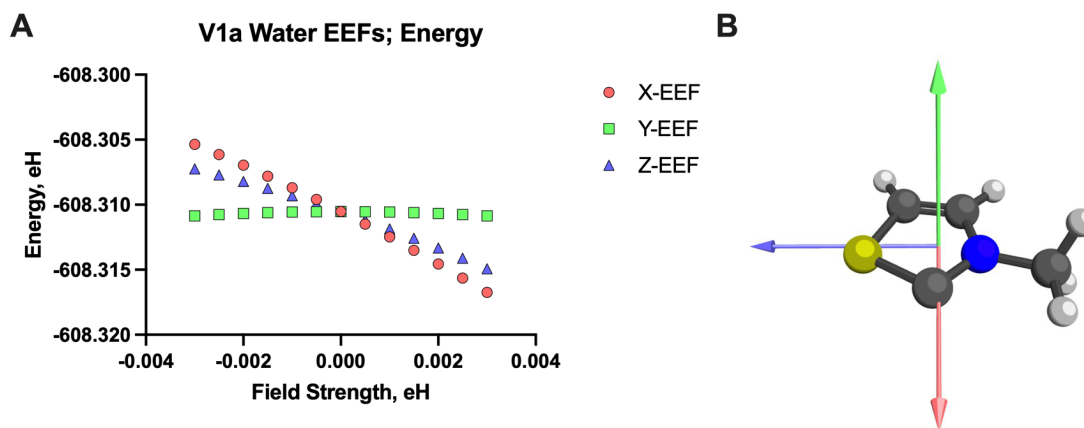

Figure S47.  $V_{1a}$  Energy under EEFs in Water. Axis definitions given in (B).

Table S46.  ${}^3V_{1a}$  Under EEFs in Gas. Energy given in Hartree.

| Field   | Energy, X-EEF | Energy, Y-EEF | Energy, Z-EEF |
|---------|---------------|---------------|---------------|
| -0.0030 | -608.195360   | -608.197090   | -608.193970   |
| -0.0025 | -608.195470   | -608.196930   | -608.194300   |
| -0.0020 | -608.195600   | -608.196770   | -608.194650   |
| -0.0015 | -608.195750   | -608.196640   | -608.195030   |
| -0.0010 | -608.195910   | -608.196510   | -608.195430   |
| -0.0005 | -608.196100   | -608.196400   | -608.195860   |
| +0.0000 | -608.196300   | -608.196300   | -608.196300   |
| +0.0005 | -608.196530   | -608.196220   | -608.196780   |
| +0.0010 | -608.196770   | -608.196160   | -608.197270   |
| +0.0015 | -608.197030   | -608.196100   | -608.197800   |
| +0.0020 | -608.197310   | -608.196060   | -608.198340   |
| +0.0025 | -608.197610   | -608.196040   | -608.198910   |
| +0.0030 | -608.197930   | -608.196030   | -608.199500   |

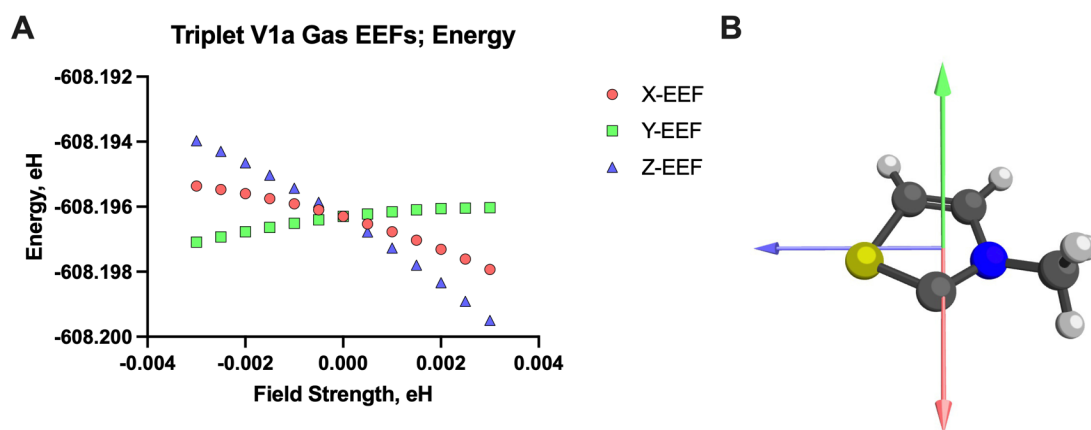

Figure S48.  ${}^3V_{1a}$  Energy under EEFs in Gas. Axis definitions given in (B).

Table S47.  ${}^3V_{1a}$  Under EEFs in SMD Toluene. Energy given in Hartree.

| Field   | Energy, X-EEF | Energy, Y-EEF | Energy, Z-EEF |
|---------|---------------|---------------|---------------|
| -0.0030 | -608.201184   | -608.203300   | -608.199525   |
| -0.0025 | -608.201323   | -608.203101   | -608.199927   |
| -0.0020 | -608.201484   | -608.202918   | -608.200357   |
| -0.0015 | -608.201668   | -608.202752   | -608.200814   |
| -0.0010 | -608.201874   | -608.202602   | -608.201299   |
| -0.0005 | -608.202102   | -608.202469   | -608.201812   |
| +0.0000 | -608.202352   | -608.202352   | -608.202352   |
| +0.0005 | -608.202625   | -608.202252   | -608.202920   |
| +0.0010 | -608.202921   | -608.202169   | -608.203517   |
| +0.0015 | -608.203238   | -608.202102   | -608.204140   |
| +0.0020 | -608.203579   | -608.202052   | -608.204792   |
| +0.0025 | -608.203942   | -608.202019   | -608.205471   |
| +0.0030 | -608.204327   | -608.202002   | -608.206178   |

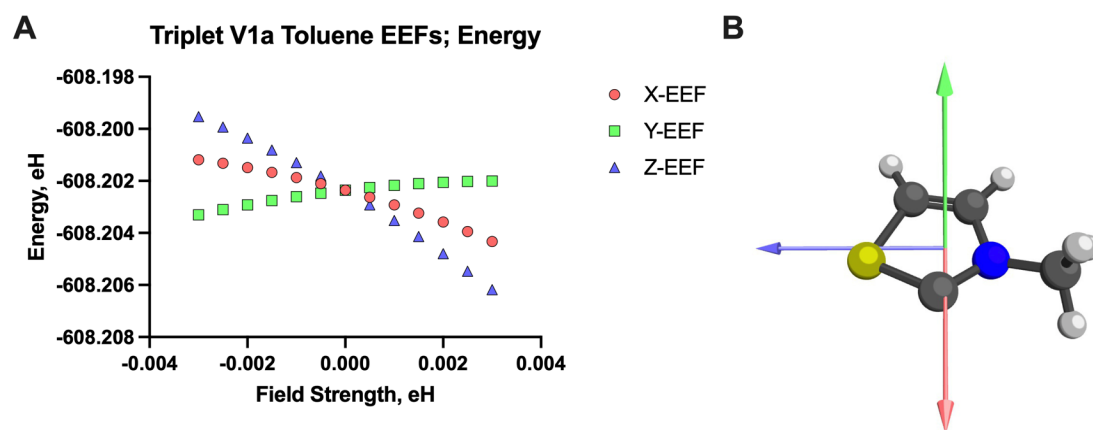

Figure S49.  ${}^3V_{1a}$  Energy under EEFs in Toluene. Axis definitions given in (B).

Table S48.  ${}^3V_{1a}$  Under EEFs in SMD Dichloromethane. Energy given in Hartree.

| Field   | Energy, X-EEF | Energy, Y-EEF | Energy, Z-EEF |
|---------|---------------|---------------|---------------|
| -0.0030 | -608.203769   | -608.206264   | -608.201954   |
| -0.0025 | -608.203937   | -608.206033   | -608.202411   |
| -0.0020 | -608.204131   | -608.205821   | -608.202900   |
| -0.0015 | -608.204351   | -608.205629   | -608.203420   |
| -0.0010 | -608.204598   | -608.205456   | -608.203972   |
| -0.0005 | -608.204870   | -608.205302   | -608.204554   |
| +0.0000 | -608.205168   | -608.205168   | -608.205168   |
| +0.0005 | -608.205492   | -608.205053   | -608.205813   |
| +0.0010 | -608.205843   | -608.204957   | -608.206489   |
| +0.0015 | -608.206220   | -608.204881   | -608.207196   |
| +0.0020 | -608.206623   | -608.204825   | -608.207935   |
| +0.0025 | -608.207053   | -608.204788   | -608.208705   |
| +0.0030 | -608.207509   | -608.204771   | -608.209506   |

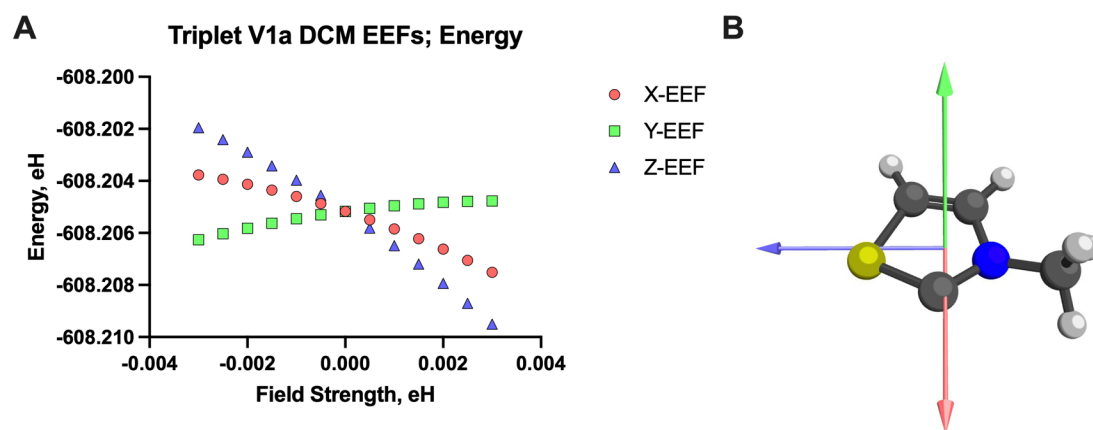

Figure S50.  ${}^3V_{1a}$  Energy under EEFs in MeCN. Axis definitions given in (B).



Table S49.  ${}^3V_{1a}$  Under EEFs in SMD Acetonitrile. Energy given in Hartree.

| Field   | Energy, X-EEF | Energy, Y-EEF | Energy, Z-EEF |
|---------|---------------|---------------|---------------|
| -0.0030 | -608.203204   | -608.205849   | -608.201352   |
| -0.0025 | -608.203384   | -608.205606   | -608.201828   |
| -0.0020 | -608.203592   | -608.205383   | -608.202337   |
| -0.0015 | -608.203827   | -608.205180   | -608.202878   |
| -0.0010 | -608.204089   | -608.204998   | -608.203452   |
| -0.0005 | -608.204379   | -608.204837   | -608.204058   |
| +0.0000 | -608.204697   | -608.204697   | -608.204697   |
| +0.0005 | -608.205042   | -608.204577   | -608.205368   |
| +0.0010 | -608.205415   | -608.204478   | -608.206071   |
| +0.0015 | -608.205816   | -608.204400   | -608.206807   |
| +0.0020 | -608.206245   | -608.204342   | -608.207576   |
| +0.0025 | -608.206702   | -608.204306   | -608.208377   |
| +0.0030 | -608.207188   | -608.204290   | -608.209211   |

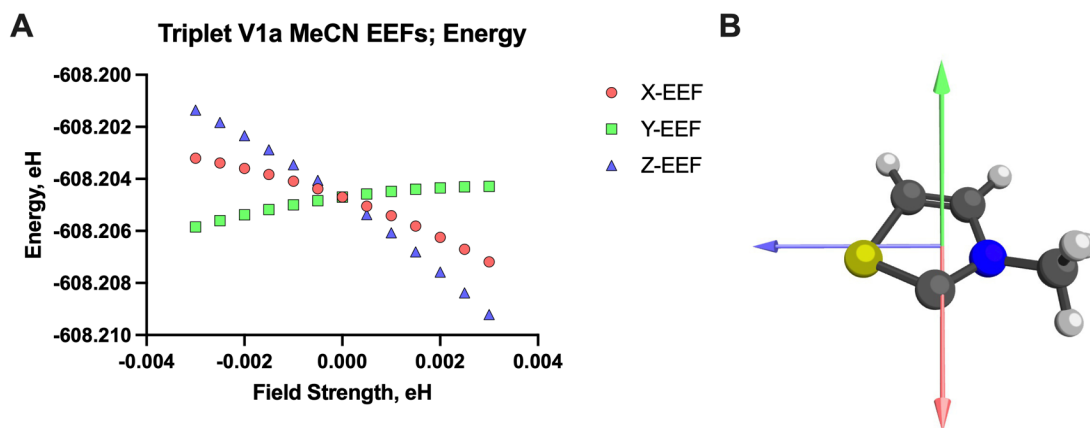

Figure S51.  ${}^3V_{1a}$  Energy under EEFs in MeCN. Axis definitions given in (B).

Table S50.  ${}^3V_{1a}$  Under EEFs in SMD Water. Energy given in Hartree.

| Field   | Energy, X-EEF | Energy, Y-EEF | Energy, Z-EEF |
|---------|---------------|---------------|---------------|
| -0.0030 | -608.195915   | -608.198590   | -608.194056   |
| -0.0025 | -608.196097   | -608.198344   | -608.194536   |
| -0.0020 | -608.196308   | -608.198119   | -608.195049   |
| -0.0015 | -608.196545   | -608.197914   | -608.195594   |
| -0.0010 | -608.196811   | -608.197731   | -608.196172   |
| -0.0005 | -608.197105   | -608.197568   | -608.196783   |
| +0.0000 | -608.197426   | -608.197426   | -608.197426   |
| +0.0005 | -608.197776   | -608.197306   | -608.198103   |
| +0.0010 | -608.198154   | -608.197206   | -608.198811   |
| +0.0015 | -608.198560   | -608.197127   | -608.199553   |
| +0.0020 | -608.198994   | -608.197070   | -608.200327   |
| +0.0025 | -608.199457   | -608.197033   | -608.201134   |
| +0.0030 | -608.199948   | -608.197018   | -608.201975   |

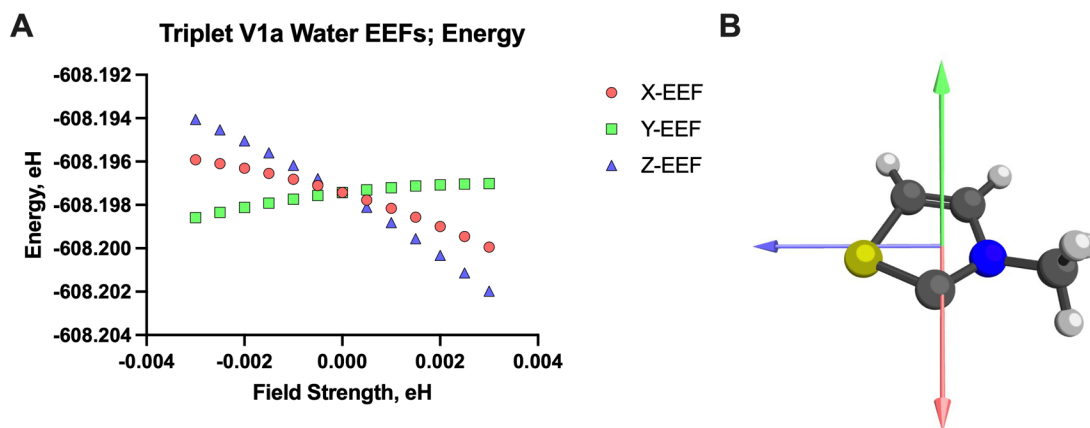

Figure S52.  ${}^3V_{1a}$  Energy under EEFs in Water. Axis definitions given in (B).

Table S51. VI<sub>1a</sub> Under EEFs in Gas. Energy given in Hartree.

| Field   | Energy, X-EEF | Energy, Y-EEF | Energy, Z-EEF |
|---------|---------------|---------------|---------------|
| -0.0030 | -305.970126   | -305.973592   | -305.973754   |
| -0.0025 | -305.970608   | -305.973508   | -305.973620   |
| -0.0020 | -305.971110   | -305.973440   | -305.973511   |
| -0.0015 | -305.971632   | -305.973386   | -305.973426   |
| -0.0010 | -305.972174   | -305.973348   | -305.973366   |
| -0.0005 | -305.972736   | -305.973325   | -305.973329   |
| +0.0000 | -305.973317   | -305.973317   | -305.973317   |
| +0.0005 | -305.973919   | -305.973325   | -305.973329   |
| +0.0010 | -305.974540   | -305.973348   | -305.973366   |
| +0.0015 | -305.975181   | -305.973386   | -305.973426   |
| +0.0020 | -305.975841   | -305.973440   | -305.973511   |
| +0.0025 | -305.976522   | -305.973508   | -305.973620   |
| +0.0030 | -305.977222   | -305.973592   | -305.973754   |

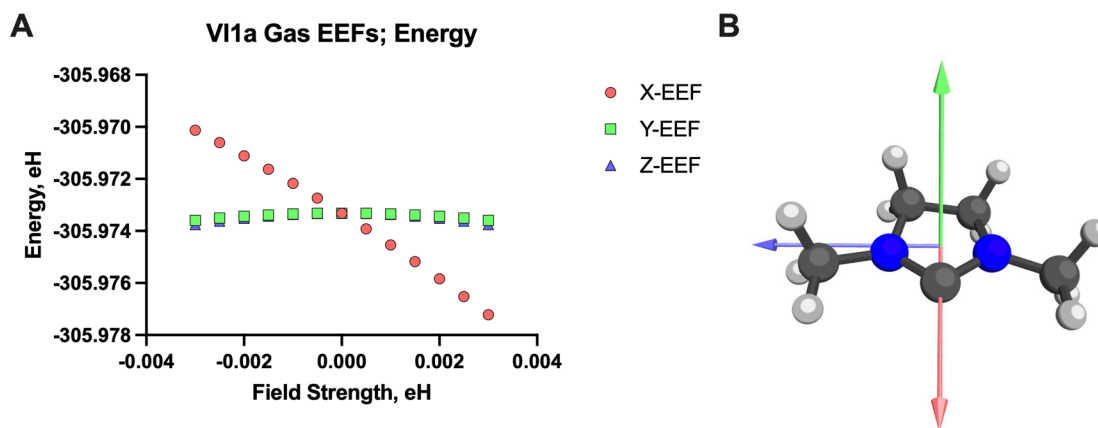

Figure S53. VI<sub>1a</sub> Energy under EEFs in Gas. Axis definitions given in (B).

Table S52. VI<sub>1a</sub> Under EEFs in SMD Toluene. Energy given in Hartree.

| Field   | Energy, X-EEF | Energy, Y-EEF | Energy, Z-EEF |
|---------|---------------|---------------|---------------|
| -0.0030 | -305.985037   | -305.989279   | -305.989463   |
| -0.0025 | -305.985633   | -305.989181   | -305.989309   |
| -0.0020 | -305.986252   | -305.989101   | -305.989183   |
| -0.0015 | -305.986894   | -305.989039   | -305.989085   |
| -0.0010 | -305.987559   | -305.988995   | -305.989015   |
| -0.0005 | -305.988247   | -305.988968   | -305.988973   |
| +0.0000 | -305.988959   | -305.988959   | -305.988959   |
| +0.0005 | -305.989694   | -305.988968   | -305.988973   |
| +0.0010 | -305.990452   | -305.988995   | -305.989015   |
| +0.0015 | -305.991233   | -305.989039   | -305.989085   |
| +0.0020 | -305.992038   | -305.989101   | -305.989183   |
| +0.0025 | -305.992866   | -305.989181   | -305.989309   |
| +0.0030 | -305.993717   | -305.989279   | -305.989463   |

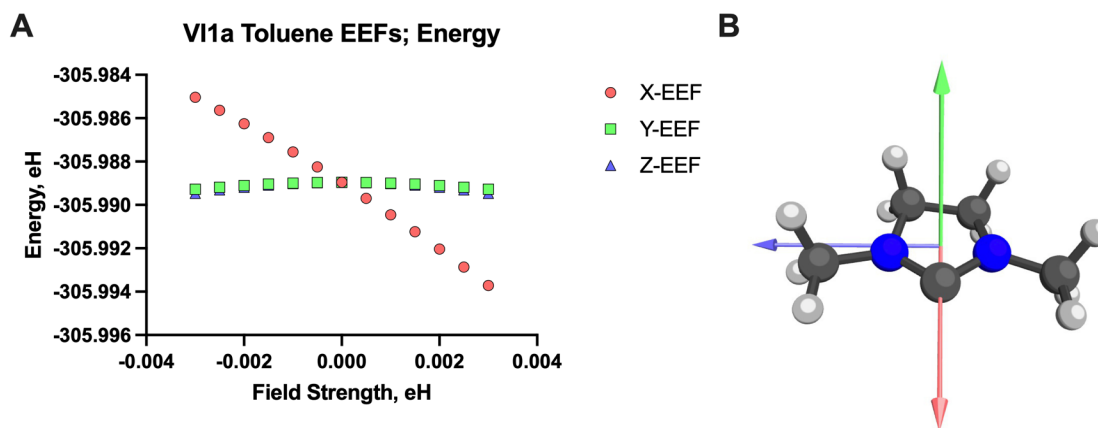

Figure S54. VI<sub>1a</sub> Energy under EEFs in Toluene. Axis definitions given in (B).

Table S53. VI<sub>1a</sub> Under EEFs in SMD Dichloromethane.

| Field   | Energy, X-EEF | Energy, Y-EEF | Energy, Z-EEF |
|---------|---------------|---------------|---------------|
| -0.0030 | -305.988595   | -305.993675   | -305.993861   |
| -0.0025 | -305.989312   | -305.993560   | -305.993689   |
| -0.0020 | -305.990056   | -305.993466   | -305.993549   |
| -0.0015 | -305.990827   | -305.993393   | -305.993439   |
| -0.0010 | -305.991624   | -305.993341   | -305.993361   |
| -0.0005 | -305.992448   | -305.993309   | -305.993315   |
| +0.0000 | -305.993299   | -305.993299   | -305.993299   |
| +0.0005 | -305.994177   | -305.993309   | -305.993315   |
| +0.0010 | -305.995081   | -305.993341   | -305.993361   |
| +0.0015 | -305.996012   | -305.993393   | -305.993439   |
| +0.0020 | -305.996970   | -305.993466   | -305.993549   |
| +0.0025 | -305.997955   | -305.993560   | -305.993689   |
| +0.0030 | -305.998966   | -305.993675   | -305.993861   |

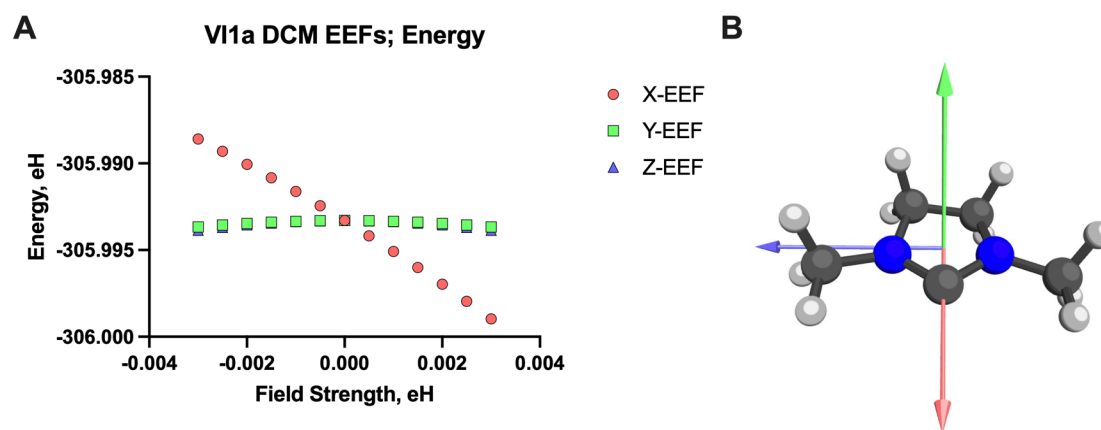

Figure S55. VI<sub>1a</sub> Energy under EEFs in DCM. Axis definitions given in (B).

Table S54. VI<sub>1a</sub> Under EEFs in SMD Acetonitrile. Energy given in Hartree.

| Field   | Energy, X-EEF | Energy, Y-EEF | Energy, Z-EEF |
|---------|---------------|---------------|---------------|
| -0.0030 | -305.988428   | -305.993855   | -305.994037   |
| -0.0025 | -305.989195   | -305.993733   | -305.993859   |
| -0.0020 | -305.989990   | -305.993632   | -305.993713   |
| -0.0015 | -305.990814   | -305.993554   | -305.993599   |
| -0.0010 | -305.991666   | -305.993498   | -305.993518   |
| -0.0005 | -305.992546   | -305.993465   | -305.993470   |
| +0.0000 | -305.993454   | -305.993454   | -305.993454   |
| +0.0005 | -305.994390   | -305.993465   | -305.993470   |
| +0.0010 | -305.995355   | -305.993498   | -305.993518   |
| +0.0015 | -305.996347   | -305.993554   | -305.993599   |
| +0.0020 | -305.997369   | -305.993632   | -305.993713   |
| +0.0025 | -305.998418   | -305.993733   | -305.993859   |
| +0.0030 | -305.999496   | -305.993855   | -305.994037   |

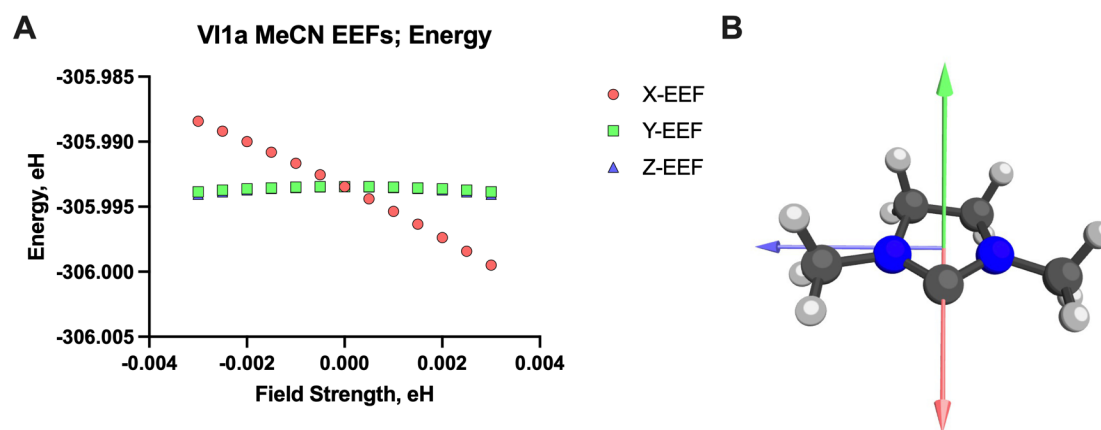

Figure S56. VI<sub>1a</sub> Energy under EEFs in MeCN. Axis definitions given in (B).

Table S55. VI<sub>1a</sub> Under EEFs in SMD Water. Energy given in Hartree.

| Field   | Energy, X-EEF | Energy, Y-EEF | Energy, Z-EEF |
|---------|---------------|---------------|---------------|
| -0.0030 | -305.975625   | -305.981125   | -305.981305   |
| -0.0025 | -305.976402   | -305.981000   | -305.981125   |
| -0.0020 | -305.977208   | -305.980898   | -305.980978   |
| -0.0015 | -305.978043   | -305.980819   | -305.980864   |
| -0.0010 | -305.978906   | -305.980763   | -305.980783   |
| -0.0005 | -305.979797   | -305.980729   | -305.980734   |
| +0.0000 | -305.980717   | -305.980717   | -305.980717   |
| +0.0005 | -305.981666   | -305.980729   | -305.980734   |
| +0.0010 | -305.982643   | -305.980763   | -305.980783   |
| +0.0015 | -305.983649   | -305.980819   | -305.980864   |
| +0.0020 | -305.984683   | -305.980898   | -305.980978   |
| +0.0025 | -305.985745   | -305.981000   | -305.981125   |
| +0.0030 | -305.986837   | -305.981125   | -305.981305   |

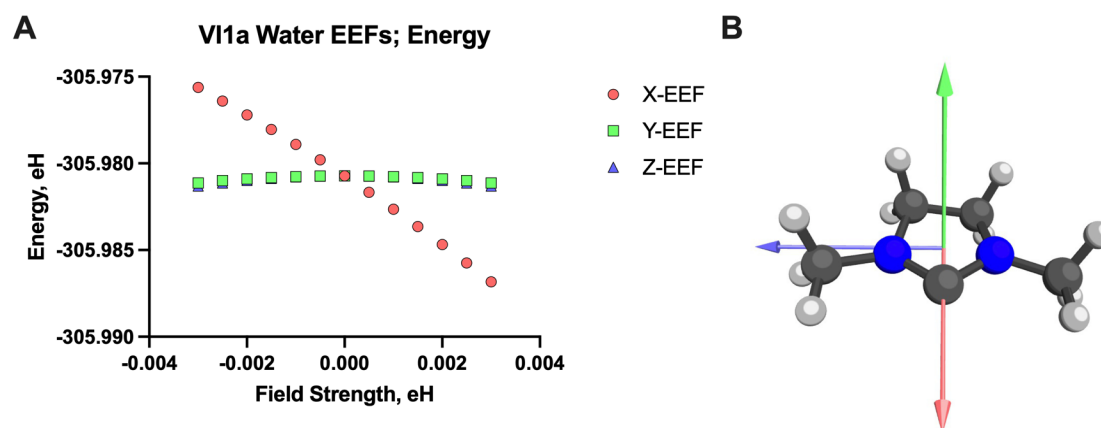

Figure S57. VI<sub>1a</sub> Energy under EEFs in Water. Axis definitions given in (B).

Table S56.  ${}^3\text{VI}_{1a}$  Under EEFs in Gas. Energy given in Hartree.

| Field   | Energy, X-EEF | Energy, Y-EEF | Energy, Z-EEF |
|---------|---------------|---------------|---------------|
| -0.0030 | -305.858380   | -305.859994   | -305.860271   |
| -0.0025 | -305.858551   | -305.859898   | -305.860119   |
| -0.0020 | -305.858742   | -305.859820   | -305.859990   |
| -0.0015 | -305.858952   | -305.859761   | -305.859884   |
| -0.0010 | -305.859182   | -305.859721   | -305.859799   |
| -0.0005 | -305.859430   | -305.859700   | -305.859738   |
| +0.0000 | -305.859698   | -305.859698   | -305.859698   |
| +0.0005 | -305.859985   | -305.859715   | -305.859681   |
| +0.0010 | -305.860291   | -305.859751   | -305.859686   |
| +0.0015 | -305.860617   | -305.859805   | -305.859714   |
| +0.0020 | -305.860962   | -305.859879   | -305.859764   |
| +0.0025 | -305.861326   | -305.859972   | -305.859837   |
| +0.0030 | -305.861710   | -305.860084   | -305.859932   |

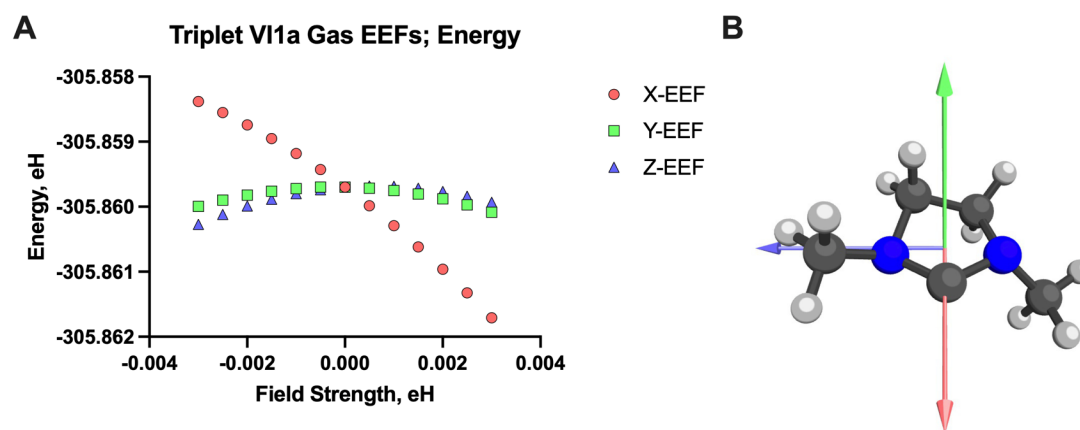

Figure S58.  ${}^3\text{VI}_{1a}$  Energy under EEFs in Gas. Axis definitions given in (B).



Table S57.  $^3V_{1a}$  Under EEFs in SMD Toluene. Energy given in Hartree.

| Field   | Energy, X-EEF | Energy, Y-EEF | Energy, Z-EEF |
|---------|---------------|---------------|---------------|
| -0.0030 | -305.869624   | -305.871607   | -305.871904   |
| -0.0025 | -305.869838   | -305.871492   | -305.871730   |
| -0.0020 | -305.870075   | -305.871399   | -305.871582   |
| -0.0015 | -305.870334   | -305.871327   | -305.871460   |
| -0.0010 | -305.870615   | -305.871278   | -305.871363   |
| -0.0005 | -305.870920   | -305.871251   | -305.871292   |
| +0.0000 | -305.871246   | -305.871246   | -305.871246   |
| +0.0005 | -305.871595   | -305.871263   | -305.871226   |
| +0.0010 | -305.871967   | -305.871303   | -305.871232   |
| +0.0015 | -305.872362   | -305.871364   | -305.871264   |
| +0.0020 | -305.872779   | -305.871448   | -305.871321   |
| +0.0025 | -305.873219   | -305.871555   | -305.871404   |
| +0.0030 | -305.873681   | -305.871683   | -305.871513   |

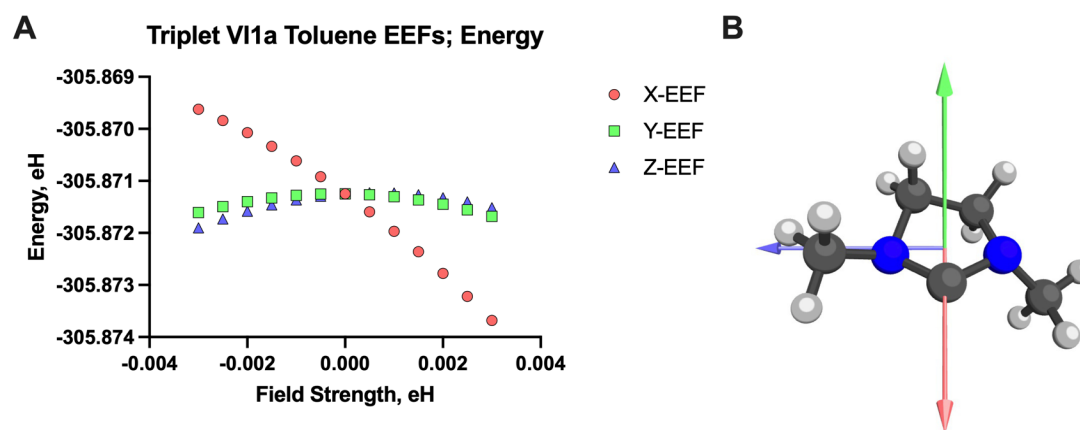

Figure S59.  $^3V_{1a}$  Energy under EEFs in Toluene. Axis definitions given in (B).

Table S58.  ${}^3\text{VI}_{1a}$  Under EEFs in SMD Dichloromethane. Energy given in Hartree.

| Field   | Energy, X-EEF | Energy, Y-EEF | Energy, Z-EEF |
|---------|---------------|---------------|---------------|
| -0.0030 | -305.871809   | -305.874179   | -305.874485   |
| -0.0025 | -305.872068   | -305.874042   | -305.874291   |
| -0.0020 | -305.872352   | -305.873931   | -305.874125   |
| -0.0015 | -305.872662   | -305.873846   | -305.873988   |
| -0.0010 | -305.872998   | -305.873787   | -305.873879   |
| -0.0005 | -305.873359   | -305.873754   | -305.873799   |
| +0.0000 | -305.873748   | -305.873748   | -305.873748   |
| +0.0005 | -305.874162   | -305.873767   | -305.873725   |
| +0.0010 | -305.874602   | -305.873812   | -305.873730   |
| +0.0015 | -305.875068   | -305.873883   | -305.873764   |
| +0.0020 | -305.875561   | -305.873981   | -305.873827   |
| +0.0025 | -305.876080   | -305.874105   | -305.873919   |
| +0.0030 | -305.876625   | -305.874256   | -305.874039   |

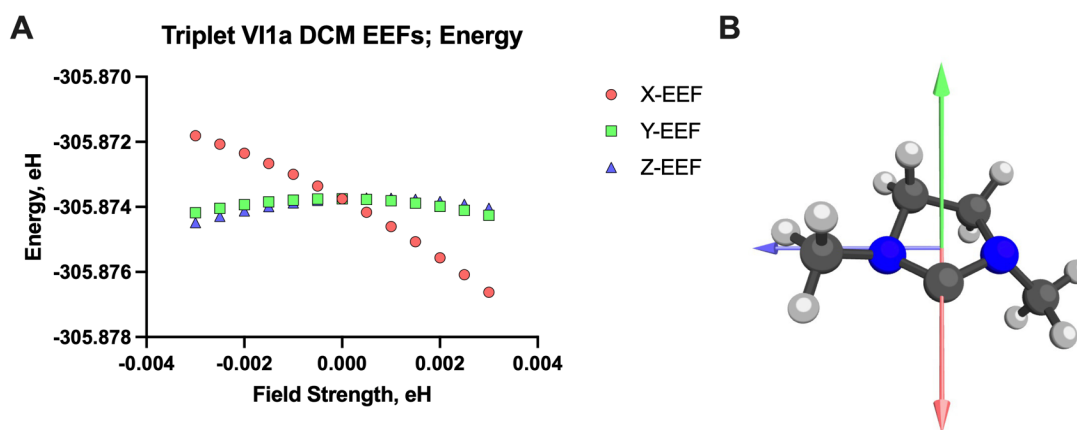

Figure S60.  ${}^3\text{VI}_{1a}$  Energy under EEFs in DCM. Axis definitions given in (B).

Table S59.  ${}^3V_{1a}$  Under EEFs in SMD Acetonitrile. Energy given in Hartree.

| Field   | Energy, X-EEF | Energy, Y-EEF | Energy, Z-EEF |
|---------|---------------|---------------|---------------|
| -0.0030 | -305.870894   | -305.873422   | -305.873729   |
| -0.0025 | -305.871170   | -305.873276   | -305.873527   |
| -0.0020 | -305.871474   | -305.873157   | -305.873355   |
| -0.0015 | -305.871805   | -305.873067   | -305.873212   |
| -0.0010 | -305.872163   | -305.873004   | -305.873099   |
| -0.0005 | -305.872548   | -305.872969   | -305.873015   |
| +0.0000 | -305.872961   | -305.872961   | -305.872961   |
| +0.0005 | -305.873402   | -305.872982   | -305.872937   |
| +0.0010 | -305.873870   | -305.873031   | -305.872942   |
| +0.0015 | -305.874366   | -305.873107   | -305.872977   |
| +0.0020 | -305.874890   | -305.873212   | -305.873042   |
| +0.0025 | -305.875441   | -305.873345   | -305.873136   |
| +0.0030 | -305.876020   | -305.873507   | -305.873260   |

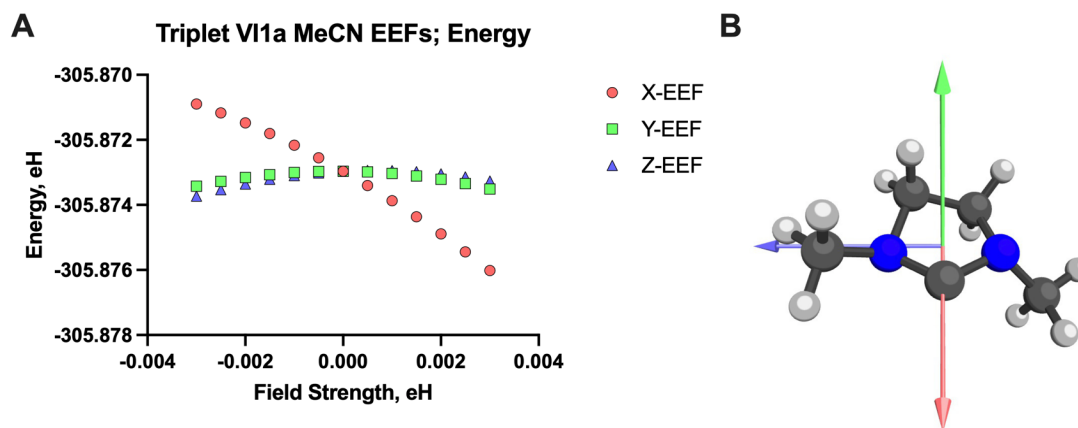

Figure S61.  ${}^3V_{1a}$  Energy under EEFs in MeCN. Axis definitions given in (B).

Table S60.  ${}^3\text{VI}_{1a}$  Under EEFs in SMD Water. Energy given in Hartree.

| Field   | Energy, X-EEF | Energy, Y-EEF | Energy, Z-EEF |
|---------|---------------|---------------|---------------|
| -0.0030 | -305.863685   | -305.866245   | -305.866552   |
| -0.0025 | -305.863964   | -305.866097   | -305.866349   |
| -0.0020 | -305.864272   | -305.865977   | -305.866175   |
| -0.0015 | -305.864607   | -305.865885   | -305.866031   |
| -0.0010 | -305.864969   | -305.865821   | -305.865917   |
| -0.0005 | -305.865360   | -305.865785   | -305.865833   |
| +0.0000 | -305.865778   | -305.865778   | -305.865778   |
| +0.0005 | -305.866224   | -305.865799   | -305.865754   |
| +0.0010 | -305.866698   | -305.865849   | -305.865759   |
| +0.0015 | -305.867200   | -305.865926   | -305.865794   |
| +0.0020 | -305.867730   | -305.866033   | -305.865859   |
| +0.0025 | -305.868288   | -305.866168   | -305.865954   |
| +0.0030 | -305.868875   | -305.866332   | -305.866079   |

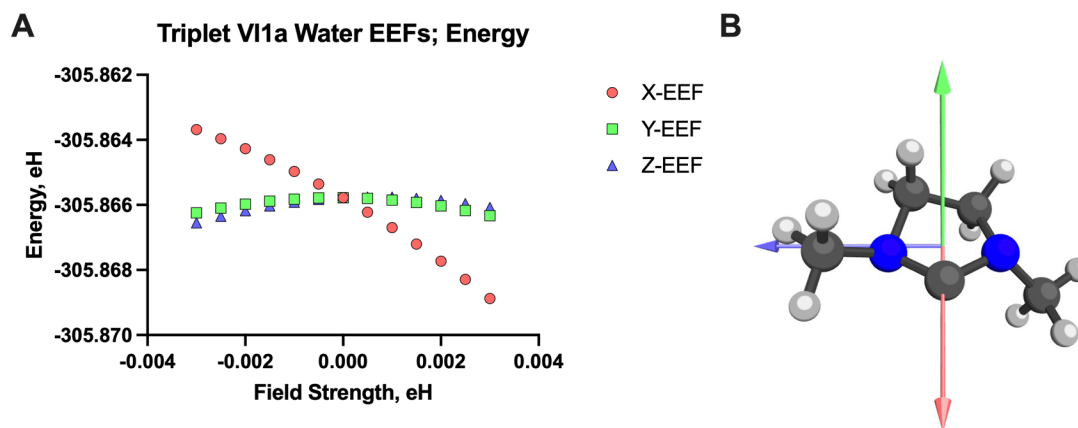

Figure S62.  ${}^3\text{VI}_{1a}$  Energy under EEFs in Water. Axis definitions given in (B).

Table S61. VII<sub>1a</sub> Under EEFs in Gas. Energy given in Hartree.

| Field   | Energy, X-EEF | Energy, Y-EEF | Energy, Z-EEF |
|---------|---------------|---------------|---------------|
| -0.0030 | -345.278395   | -345.281889   | -345.282081   |
| -0.0025 | -345.278870   | -345.281794   | -345.281930   |
| -0.0020 | -345.279367   | -345.281717   | -345.281806   |
| -0.0015 | -345.279888   | -345.281658   | -345.281710   |
| -0.0010 | -345.280431   | -345.281617   | -345.281641   |
| -0.0005 | -345.280997   | -345.281593   | -345.281600   |
| +0.0000 | -345.281587   | -345.281587   | -345.281587   |
| +0.0005 | -345.282199   | -345.281598   | -345.281600   |
| +0.0010 | -345.282834   | -345.281627   | -345.281641   |
| +0.0015 | -345.283492   | -345.281674   | -345.281710   |
| +0.0020 | -345.284174   | -345.281738   | -345.281806   |
| +0.0025 | -345.284878   | -345.281820   | -345.281930   |
| +0.0030 | -345.285606   | -345.281920   | -345.282080   |

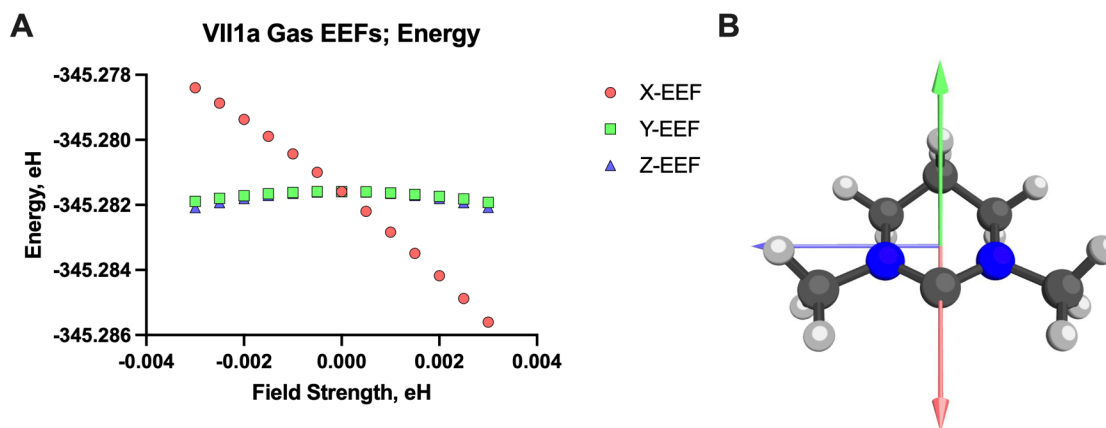

Figure S63. VII<sub>1a</sub> Energy under EEFs in Gas. Axis definitions given in (B).

Table S62. VII<sub>1a</sub> Under EEFs in SMD Toluene. Energy given in Hartree.

| Field   | Energy, X-EEF | Energy, Y-EEF | Energy, Z-EEF |
|---------|---------------|---------------|---------------|
| -0.0030 | -345.293356   | -345.297623   | -345.297860   |
| -0.0025 | -345.293943   | -345.297515   | -345.297685   |
| -0.0020 | -345.294558   | -345.297427   | -345.297541   |
| -0.0015 | -345.295199   | -345.297361   | -345.297429   |
| -0.0010 | -345.295868   | -345.297315   | -345.297349   |
| -0.0005 | -345.296563   | -345.297290   | -345.297301   |
| +0.0000 | -345.297285   | -345.297285   | -345.297285   |
| +0.0005 | -345.298034   | -345.297301   | -345.297301   |
| +0.0010 | -345.298810   | -345.297338   | -345.297349   |
| +0.0015 | -345.299613   | -345.297396   | -345.297429   |
| +0.0020 | -345.300443   | -345.297474   | -345.297541   |
| +0.0025 | -345.301300   | -345.297573   | -345.297685   |
| +0.0030 | -345.302184   | -345.297693   | -345.297860   |

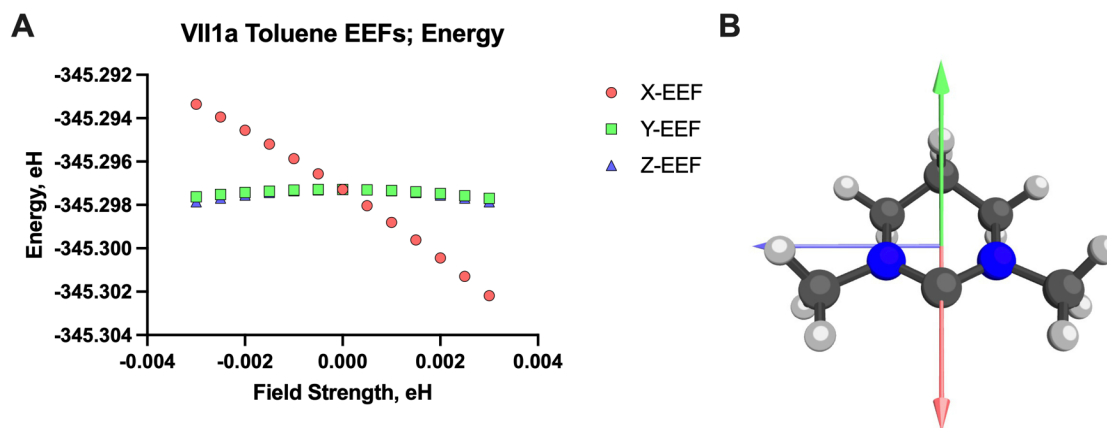

Figure S64. VII<sub>1a</sub> Energy under EEFs in Toluene. Axis definitions given in (B).

Table S63. VII<sub>1a</sub> Under EEFs in SMD Dichloromethane.

| Field   | Energy, X-EEF | Energy, Y-EEF | Energy, Z-EEF |
|---------|---------------|---------------|---------------|
| -0.0030 | -345.297096   | -345.302196   | -345.302478   |
| -0.0025 | -345.297808   | -345.302073   | -345.302280   |
| -0.0020 | -345.298550   | -345.301975   | -345.302118   |
| -0.0015 | -345.299324   | -345.301902   | -345.301992   |
| -0.0010 | -345.300128   | -345.301853   | -345.301901   |
| -0.0005 | -345.300963   | -345.301829   | -345.301847   |
| +0.0000 | -345.301829   | -345.301829   | -345.301829   |
| +0.0005 | -345.302727   | -345.301854   | -345.301847   |
| +0.0010 | -345.303655   | -345.301904   | -345.301901   |
| +0.0015 | -345.304614   | -345.301978   | -345.301992   |
| +0.0020 | -345.305605   | -345.302076   | -345.302118   |
| +0.0025 | -345.306626   | -345.302199   | -345.302280   |
| +0.0030 | -345.307679   | -345.302347   | -345.302478   |

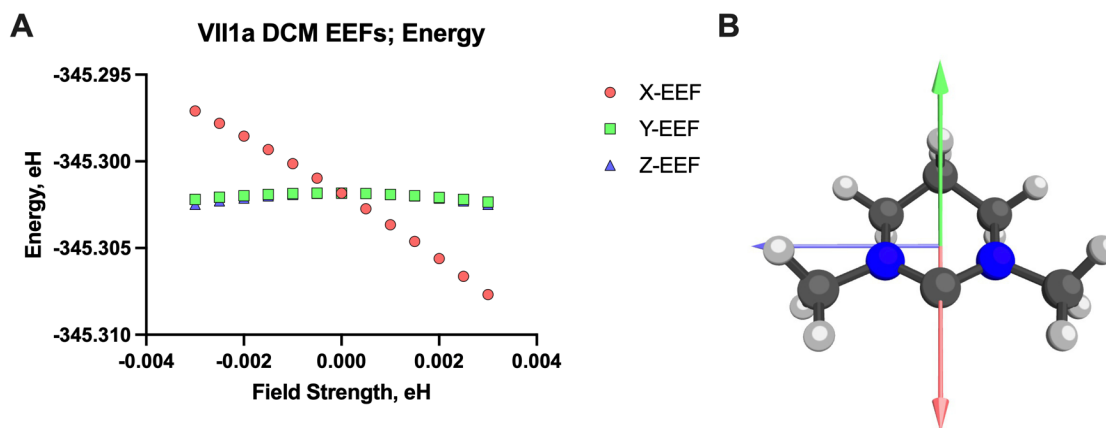

Figure S65. VII<sub>1a</sub> Energy under EEFs in DCM. Axis definitions given in (B).

**Table S64. VII<sub>1a</sub> Under EEFs in SMD Acetonitrile.** Energy given in Hartree.

| Field   | Energy, X-EEF | Energy, Y-EEF | Energy, Z-EEF |
|---------|---------------|---------------|---------------|
| -0.0030 | -345.296859   | -345.302306   | -345.302606   |
| -0.0025 | -345.297623   | -345.302178   | -345.302399   |
| -0.0020 | -345.298419   | -345.302075   | -345.302231   |
| -0.0015 | -345.299248   | -345.302000   | -345.302099   |
| -0.0010 | -345.300110   | -345.301950   | -345.302006   |
| -0.0005 | -345.301004   | -345.301927   | -345.301949   |
| +0.0000 | -345.301931   | -345.301931   | -345.301931   |
| +0.0005 | -345.302890   | -345.301960   | -345.301949   |
| +0.0010 | -345.303882   | -345.302016   | -345.302006   |
| +0.0015 | -345.304907   | -345.302099   | -345.302099   |
| +0.0020 | -345.305964   | -345.302208   | -345.302231   |
| +0.0025 | -345.307055   | -345.302343   | -345.302399   |
| +0.0030 | -345.308178   | -345.302505   | -345.302606   |

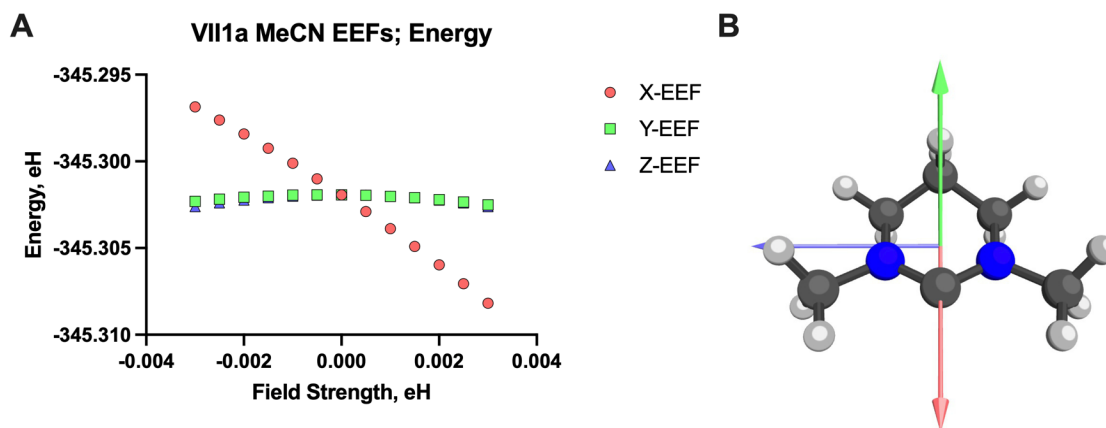

**Figure S66. VII<sub>1a</sub> Energy under EEFs in MeCN.** Axis definitions given in (B).



Table S65. VII<sub>1a</sub> Under EEFs in SMD Water. Energy given in Hartree.

| Field   | Energy, X-EEF | Energy, Y-EEF | Energy, Z-EEF |
|---------|---------------|---------------|---------------|
| -0.0030 | -345.284153   | -345.289672   | -345.289976   |
| -0.0025 | -345.284928   | -345.289542   | -345.289768   |
| -0.0020 | -345.285736   | -345.289439   | -345.289597   |
| -0.0015 | -345.286576   | -345.289363   | -345.289465   |
| -0.0010 | -345.287449   | -345.289314   | -345.289371   |
| -0.0005 | -345.288356   | -345.289291   | -345.289314   |
| +0.0000 | -345.289295   | -345.289295   | -345.289295   |
| +0.0005 | -345.290267   | -345.289326   | -345.289314   |
| +0.0010 | -345.291272   | -345.289384   | -345.289371   |
| +0.0015 | -345.292311   | -345.289468   | -345.289465   |
| +0.0020 | -345.293382   | -345.289579   | -345.289598   |
| +0.0025 | -345.294487   | -345.289717   | -345.289768   |
| +0.0030 | -345.295625   | -345.289882   | -345.289976   |

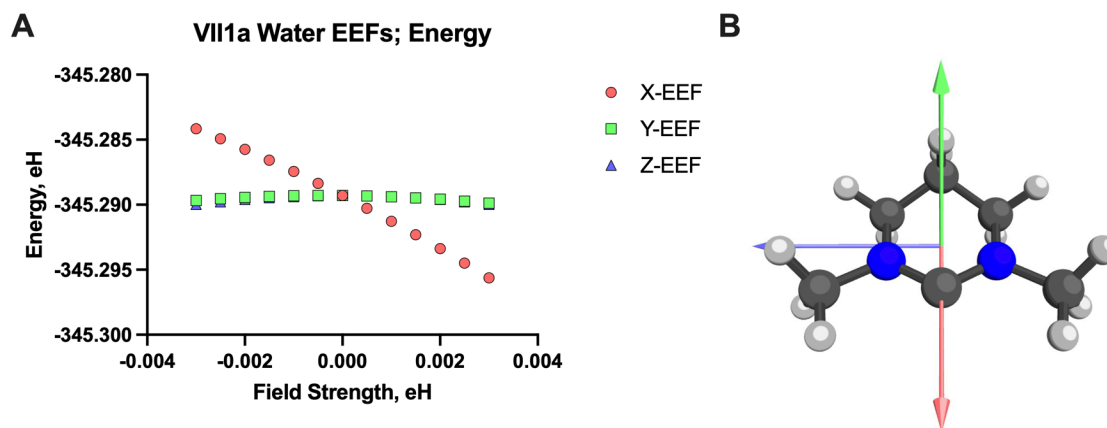

Figure S67. VII<sub>1a</sub> Energy under EEFs in Water. Axis definitions given in (B).

Table S66.  ${}^3\text{VII}_{1a}$  Under EEFs in Gas. Energy given in Hartree.

| Field   | Energy, X-EEF | Energy, Y-EEF | Energy, Z-EEF |
|---------|---------------|---------------|---------------|
| -0.0030 | -345.183650   | -345.185481   | -345.184515   |
| -0.0025 | -345.183655   | -345.185186   | -345.184367   |
| -0.0020 | -345.183683   | -345.184912   | -345.184245   |
| -0.0015 | -345.183735   | -345.184659   | -345.184150   |
| -0.0010 | -345.183809   | -345.184427   | -345.184082   |
| -0.0005 | -345.183907   | -345.184217   | -345.184042   |
| +0.0000 | -345.184028   | -345.184028   | -345.184028   |
| +0.0005 | -345.184173   | -345.183861   | -345.184042   |
| +0.0010 | -345.184340   | -345.183716   | -345.184082   |
| +0.0015 | -345.184531   | -345.183592   | -345.184150   |
| +0.0020 | -345.184746   | -345.183491   | -345.184245   |
| +0.0025 | -345.184984   | -345.183411   | -345.184367   |
| +0.0030 | -345.185246   | -345.183354   | -345.184516   |

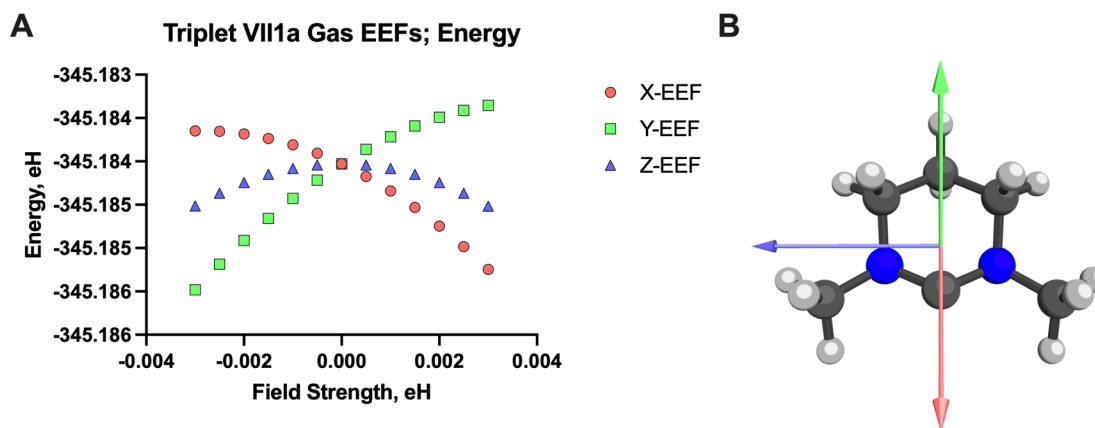

Figure S68.  ${}^3\text{VII}_{1a}$  Energy under EEFs in Gas. Axis definitions given in (B).

Table S67.  ${}^3\text{VII}_{1a}$  Under EEFs in SMD Toluene. Energy given in Hartree.

| Field   | Energy, X-EEF | Energy, Y-EEF | Energy, Z-EEF |
|---------|---------------|---------------|---------------|
| -0.0030 | -345.195257   | -345.197561   | -345.196293   |
| -0.0025 | -345.195267   | -345.197193   | -345.196120   |
| -0.0020 | -345.195305   | -345.196850   | -345.195979   |
| -0.0015 | -345.195370   | -345.196532   | -345.195869   |
| -0.0010 | -345.195462   | -345.196239   | -345.195791   |
| -0.0005 | -345.195581   | -345.195971   | -345.195744   |
| +0.0000 | -345.195728   | -345.195728   | -345.195728   |
| +0.0005 | -345.195903   | -345.195511   | -345.195744   |
| +0.0010 | -345.196104   | -345.195320   | -345.195791   |
| +0.0015 | -345.196334   | -345.195154   | -345.195870   |
| +0.0020 | -345.196590   | -345.195014   | -345.195980   |
| +0.0025 | -345.196875   | -345.194901   | -345.196121   |
| +0.0030 | -345.197187   | -345.194814   | -345.196294   |

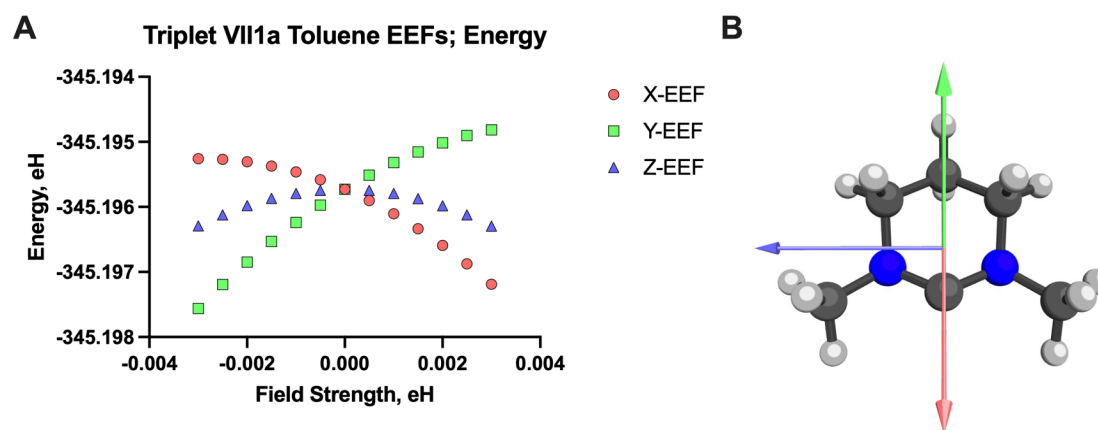

Figure S69.  ${}^3\text{VII}_{1a}$  Energy under EEFs in Toluene. Axis definitions given in (B).

Table S68.  $^3\text{VII}_{1a}$  Under EEFs in SMD Dichloromethane. Energy given in Hartree.

| Field   | Energy, X-EEF | Energy, Y-EEF | Energy, Z-EEF |
|---------|---------------|---------------|---------------|
| -0.0030 | -345.197734   | -345.200567   | -345.198919   |
| -0.0025 | -345.197746   | -345.200112   | -345.198725   |
| -0.0020 | -345.197791   | -345.199687   | -345.198567   |
| -0.0015 | -345.197867   | -345.199292   | -345.198444   |
| -0.0010 | -345.197975   | -345.198927   | -345.198356   |
| -0.0005 | -345.198114   | -345.198591   | -345.198303   |
| +0.0000 | -345.198286   | -345.198286   | -345.198286   |
| +0.0005 | -345.198489   | -345.198011   | -345.198303   |
| +0.0010 | -345.198725   | -345.197766   | -345.198356   |
| +0.0015 | -345.198993   | -345.197553   | -345.198444   |
| +0.0020 | -345.199293   | -345.197370   | -345.198568   |
| +0.0025 | -345.199625   | -345.197218   | -345.198726   |
| +0.0030 | -345.199990   | -345.197097   | -345.198920   |

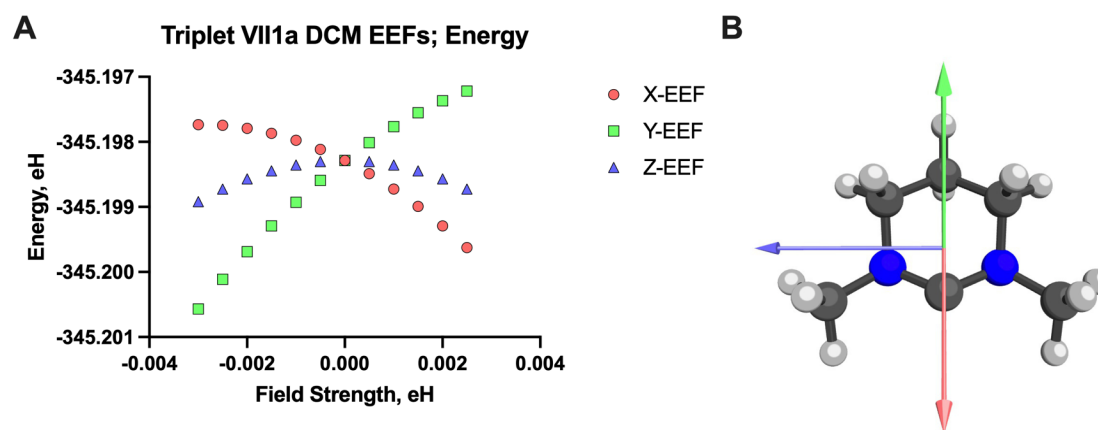

Figure S70.  $^3\text{VII}_{1a}$  Energy under EEFs in DCM. Axis definitions given in (B).

Table S69.  ${}^3\text{VII}_{1a}$  Under EEFs in SMD Acetonitrile. Energy given in Hartree.

| Field   | Energy, X-EEF | Energy, Y-EEF | Energy, Z-EEF |
|---------|---------------|---------------|---------------|
| -0.0030 | -345.196825   | -345.199886   | -345.198060   |
| -0.0025 | -345.196837   | -345.199391   | -345.197859   |
| -0.0020 | -345.196882   | -345.198929   | -345.197694   |
| -0.0015 | -345.196961   | -345.198499   | -345.197566   |
| -0.0010 | -345.197074   | -345.198101   | -345.197475   |
| -0.0005 | -345.197221   | -345.197735   | -345.197420   |
| +0.0000 | -345.197402   | -345.197402   | -345.197402   |
| +0.0005 | -345.197616   | -345.197101   | -345.197420   |
| +0.0010 | -345.197865   | -345.196833   | -345.197475   |
| +0.0015 | -345.198148   | -345.196598   | -345.197566   |
| +0.0020 | -345.198465   | -345.196397   | -345.197695   |
| +0.0025 | -345.198817   | -345.196229   | -345.197859   |
| +0.0030 | -345.199203   | -345.196095   | -345.198061   |

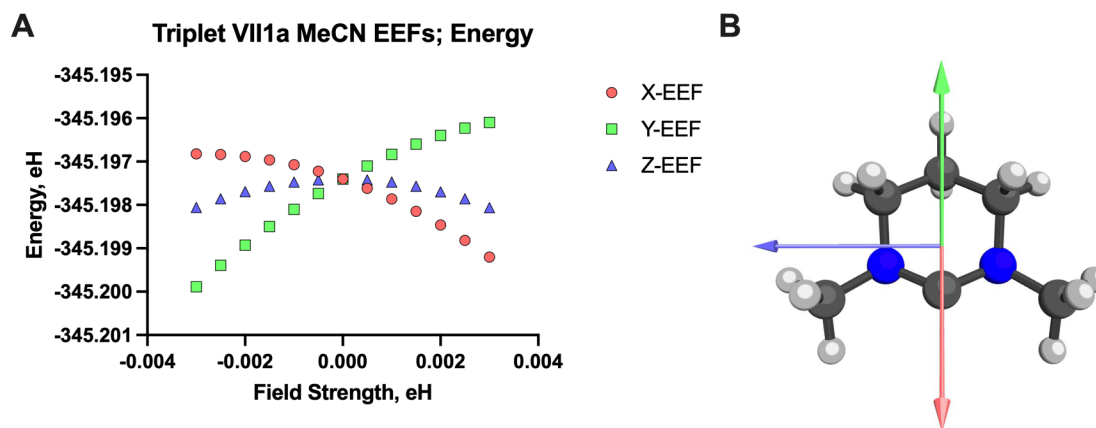

Figure S71.  ${}^3\text{VII}_{1a}$  Energy under EEFs in MeCN. Axis definitions given in (B).

Table S70.  ${}^3\text{VII}_{1a}$  Under EEFs in SMD Water. Energy given in Hartree.

| Field   | Energy, X-EEF | Energy, Y-EEF | Energy, Z-EEF |
|---------|---------------|---------------|---------------|
| -0.0030 | -345.188908   | -345.192017   | -345.190152   |
| -0.0025 | -345.188919   | -345.191514   | -345.189949   |
| -0.0020 | -345.188965   | -345.191043   | -345.189783   |
| -0.0015 | -345.189045   | -345.190605   | -345.189654   |
| -0.0010 | -345.189158   | -345.190200   | -345.189562   |
| -0.0005 | -345.189306   | -345.189828   | -345.189507   |
| +0.0000 | -345.189489   | -345.189489   | -345.189489   |
| +0.0005 | -345.189706   | -345.189183   | -345.189507   |
| +0.0010 | -345.189957   | -345.188910   | -345.189563   |
| +0.0015 | -345.190243   | -345.188671   | -345.189655   |
| +0.0020 | -345.190564   | -345.188466   | -345.189784   |
| +0.0025 | -345.190919   | -345.188294   | -345.189950   |
| +0.0030 | -345.191310   | -345.188158   | -345.190153   |

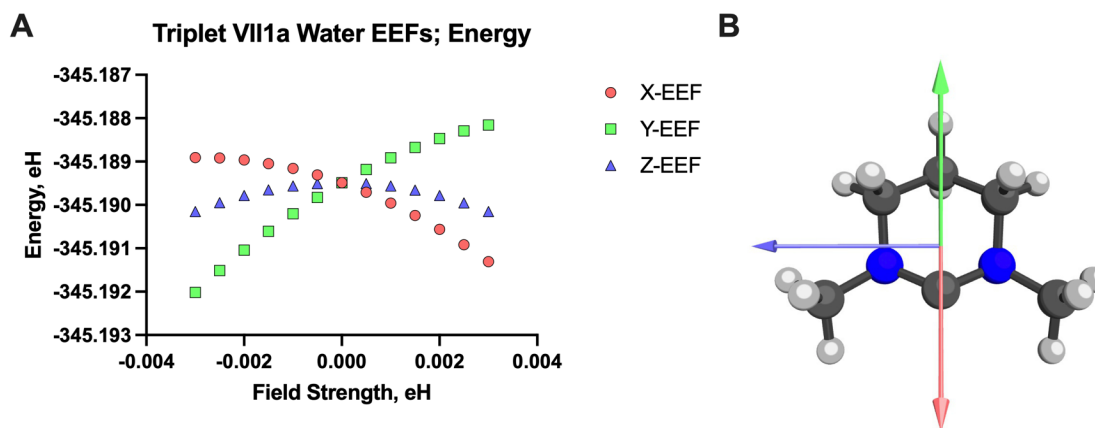

Figure S72.  ${}^3\text{VII}_{1a}$  Energy under EEFs in Water. Axis definitions given in (B).

Table S71. VIII<sub>1a</sub> Under EEFs in Gas. Energy given in Hartree.

| Field   | Energy, X-EEF | Energy, Y-EEF | Energy, Z-EEF |
|---------|---------------|---------------|---------------|
| -0.0030 | -327.995390   | -327.998327   | -327.997199   |
| -0.0025 | -327.995767   | -327.998222   | -327.997261   |
| -0.0020 | -327.996166   | -327.998136   | -327.997350   |
| -0.0015 | -327.996587   | -327.998069   | -327.997467   |
| -0.0010 | -327.997030   | -327.998021   | -327.997611   |
| -0.0005 | -327.997496   | -327.997993   | -327.997783   |
| +0.0000 | -327.997983   | -327.997983   | -327.997983   |
| +0.0005 | -327.998493   | -327.997993   | -327.998211   |
| +0.0010 | -327.999024   | -327.998021   | -327.998465   |
| +0.0015 | -327.999578   | -327.998069   | -327.998748   |
| +0.0020 | -328.000154   | -327.998136   | -327.999058   |
| +0.0025 | -328.000753   | -327.998222   | -327.999395   |
| +0.0030 | -328.001373   | -327.998327   | -327.999761   |

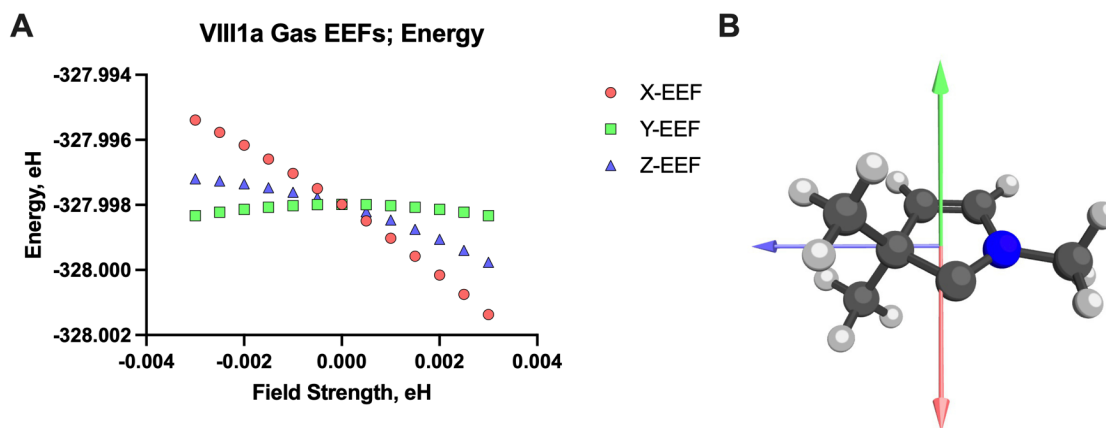

Figure S73. VIII<sub>1a</sub> Energy under EEFs in Gas. Axis definitions given in (B).

Table S72. VIII<sub>1a</sub> Under EEFs in SMD Toluene. Energy given in Hartree.

| Field   | Energy, X-EEF | Energy, Y-EEF | Energy, Z-EEF |
|---------|---------------|---------------|---------------|
| -0.0030 | -328.006387   | -328.009991   | -328.008681   |
| -0.0025 | -328.006855   | -328.009869   | -328.008752   |
| -0.0020 | -328.007349   | -328.009768   | -328.008855   |
| -0.0015 | -328.007870   | -328.009690   | -328.008991   |
| -0.0010 | -328.008417   | -328.009635   | -328.009159   |
| -0.0005 | -328.008990   | -328.009601   | -328.009358   |
| +0.0000 | -328.009590   | -328.009590   | -328.009590   |
| +0.0005 | -328.010216   | -328.009601   | -328.009854   |
| +0.0010 | -328.010869   | -328.009635   | -328.010151   |
| +0.0015 | -328.011548   | -328.009691   | -328.010479   |
| +0.0020 | -328.012254   | -328.009769   | -328.010840   |
| +0.0025 | -328.012985   | -328.009869   | -328.011232   |
| +0.0030 | -328.013744   | -328.009991   | -328.011657   |

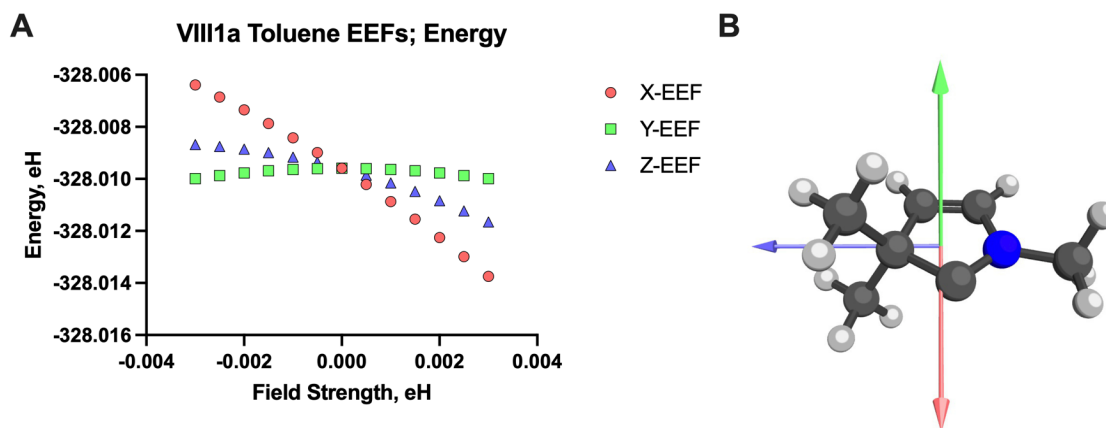

Figure S74. VIII<sub>1a</sub> Energy under EEFs in Toluene. Axis definitions given in (B).



Table S73. VIII<sub>1a</sub> Under EEFs in SMD Dichloromethane. Energy given in Hartree.

| Field   | Energy, X-EEF | Energy, Y-EEF | Energy, Z-EEF |
|---------|---------------|---------------|---------------|
| -0.0030 | -328.011023   | -328.015402   | -328.013943   |
| -0.0025 | -328.011598   | -328.015260   | -328.014017   |
| -0.0020 | -328.012203   | -328.015143   | -328.014128   |
| -0.0015 | -328.012839   | -328.015052   | -328.014275   |
| -0.0010 | -328.013507   | -328.014987   | -328.014459   |
| -0.0005 | -328.014206   | -328.014948   | -328.014679   |
| +0.0000 | -328.014936   | -328.014936   | -328.014936   |
| +0.0005 | -328.015697   | -328.014949   | -328.015228   |
| +0.0010 | -328.016489   | -328.014988   | -328.015557   |
| +0.0015 | -328.017313   | -328.015052   | -328.015923   |
| +0.0020 | -328.018169   | -328.015143   | -328.016325   |
| +0.0025 | -328.019055   | -328.015260   | -328.016763   |
| +0.0030 | -328.019974   | -328.015403   | -328.017237   |

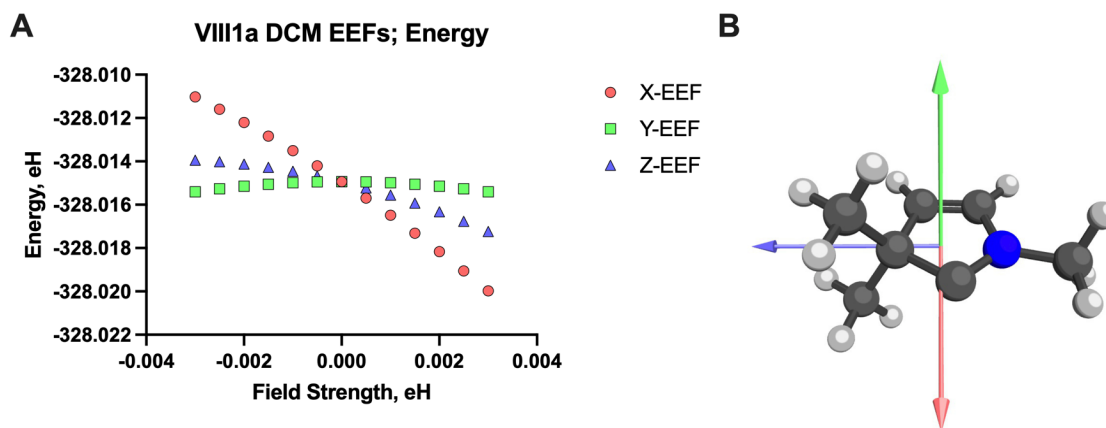

Figure S75. VIII<sub>1a</sub> Energy under EEFs in DCM. Axis definitions given in (B).

Table S74. VIII<sub>1a</sub> Under EEFs in SMD Acetonitrile. Energy given in Hartree.

| Field   | Energy, X-EEF | Energy, Y-EEF | Energy, Z-EEF |
|---------|---------------|---------------|---------------|
| -0.0030 | -328.010761   | -328.015482   | -328.013971   |
| -0.0025 | -328.011382   | -328.015330   | -328.014045   |
| -0.0020 | -328.012036   | -328.015205   | -328.014157   |
| -0.0015 | -328.012723   | -328.015109   | -328.014307   |
| -0.0010 | -328.013444   | -328.015040   | -328.014495   |
| -0.0005 | -328.014197   | -328.014998   | -328.014721   |
| +0.0000 | -328.014985   | -328.014985   | -328.014985   |
| +0.0005 | -328.015805   | -328.014999   | -328.015287   |
| +0.0010 | -328.016659   | -328.015040   | -328.015626   |
| +0.0015 | -328.017547   | -328.015109   | -328.016004   |
| +0.0020 | -328.018468   | -328.015206   | -328.016420   |
| +0.0025 | -328.019423   | -328.015330   | -328.016873   |
| +0.0030 | -328.020412   | -328.015482   | -328.017365   |

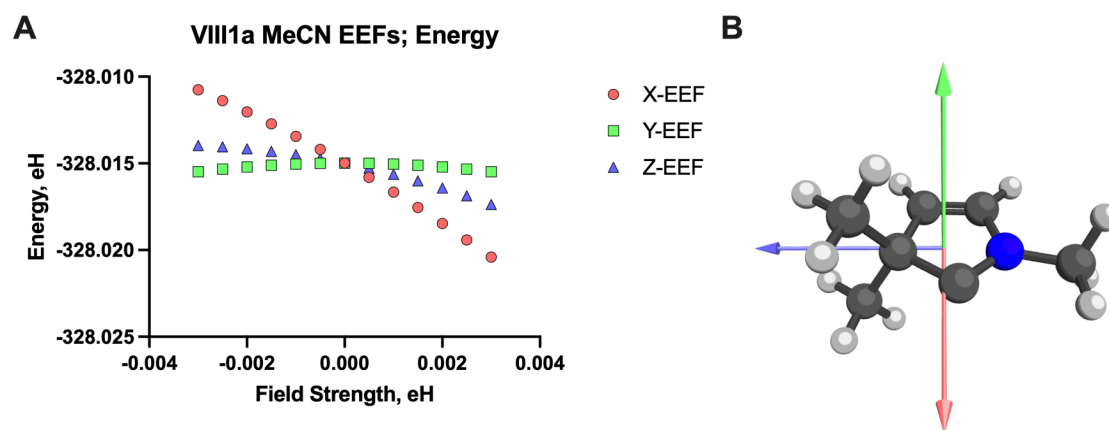

Figure S76. VIII<sub>1a</sub> Energy under EEFs in MeCN. Axis definitions given in (B).

Table S75. VIII<sub>1a</sub> Under EEFs in SMD Water. Energy given in Hartree.

| Field   | Energy, X-EEF | Energy, Y-EEF | Energy, Z-EEF |
|---------|---------------|---------------|---------------|
| -0.0030 | -328.000709   | -328.005502   | -328.003981   |
| -0.0025 | -328.001340   | -328.005348   | -328.004055   |
| -0.0020 | -328.002004   | -328.005222   | -328.004167   |
| -0.0015 | -328.002702   | -328.005124   | -328.004317   |
| -0.0010 | -328.003434   | -328.005054   | -328.004506   |
| -0.0005 | -328.004199   | -328.005012   | -328.004733   |
| +0.0000 | -328.004998   | -328.004998   | -328.004998   |
| +0.0005 | -328.005832   | -328.005012   | -328.005302   |
| +0.0010 | -328.006699   | -328.005054   | -328.005644   |
| +0.0015 | -328.007600   | -328.005124   | -328.006024   |
| +0.0020 | -328.008535   | -328.005222   | -328.006442   |
| +0.0025 | -328.009504   | -328.005348   | -328.006899   |
| +0.0030 | -328.010508   | -328.005502   | -328.007394   |

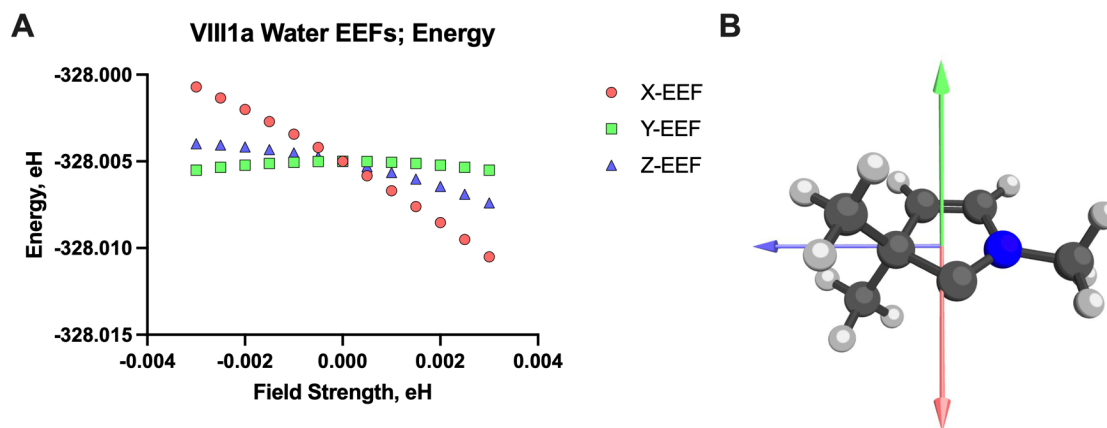

Figure S77. VIII<sub>1a</sub> Energy under EEFs in Water. Axis definitions given in (B).

Table S76.  ${}^3\text{VIII}_{1a}$  Under EEFs in Gas. Energy given in Hartree.

| Field   | Energy, X-EEF | Energy, Y-EEF | Energy, Z-EEF |
|---------|---------------|---------------|---------------|
| -0.0030 | -327.923106   | -327.924137   | -327.922553   |
| -0.0025 | -327.923080   | -327.923944   | -327.922603   |
| -0.0020 | -327.923077   | -327.923772   | -327.922683   |
| -0.0015 | -327.923095   | -327.923619   | -327.922790   |
| -0.0010 | -327.923136   | -327.923487   | -327.922926   |
| -0.0005 | -327.923198   | -327.923375   | -327.923090   |
| +0.0000 | -327.923283   | -327.923283   | -327.923283   |
| +0.0005 | -327.923389   | -327.923211   | -327.923504   |
| +0.0010 | -327.923518   | -327.923160   | -327.923753   |
| +0.0015 | -327.923668   | -327.923128   | -327.924031   |
| +0.0020 | -327.923841   | -327.923117   | -327.924337   |
| +0.0025 | -327.924035   | -327.923127   | -327.924671   |
| +0.0030 | -327.924252   | -327.923157   | -327.925035   |

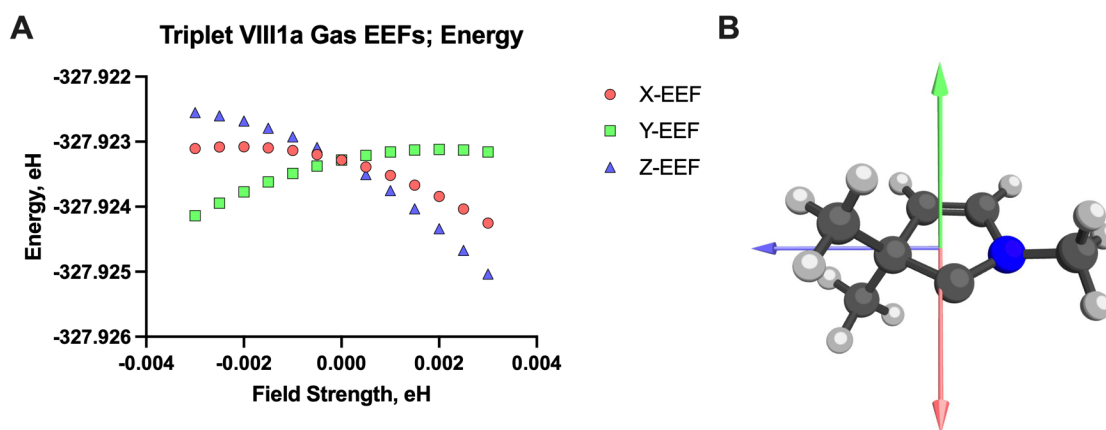

Figure S78.  ${}^3\text{VIII}_{1a}$  Energy under EEFs in Gas. Axis definitions given in (B).

Table S77.  $^3\text{VIII}_{1a}$  Under EEFs in SMD Toluene. Energy given in Hartree.

| Field   | Energy, X-EEF | Energy, Y-EEF | Energy, Z-EEF |
|---------|---------------|---------------|---------------|
| -0.0030 | -327.930927   | -327.932164   | -327.930346   |
| -0.0025 | -327.930900   | -327.931937   | -327.930398   |
| -0.0020 | -327.930898   | -327.931734   | -327.930484   |
| -0.0015 | -327.930924   | -327.931554   | -327.930602   |
| -0.0010 | -327.930975   | -327.931398   | -327.930754   |
| -0.0005 | -327.931053   | -327.931266   | -327.930939   |
| +0.0000 | -327.931157   | -327.931157   | -327.931157   |
| +0.0005 | -327.931287   | -327.931071   | -327.931407   |
| +0.0010 | -327.931443   | -327.931010   | -327.931691   |
| +0.0015 | -327.931626   | -327.930972   | -327.932008   |
| +0.0020 | -327.931835   | -327.930957   | -327.932358   |
| +0.0025 | -327.932070   | -327.930967   | -327.932741   |
| +0.0030 | -327.932332   | -327.931000   | -327.933158   |

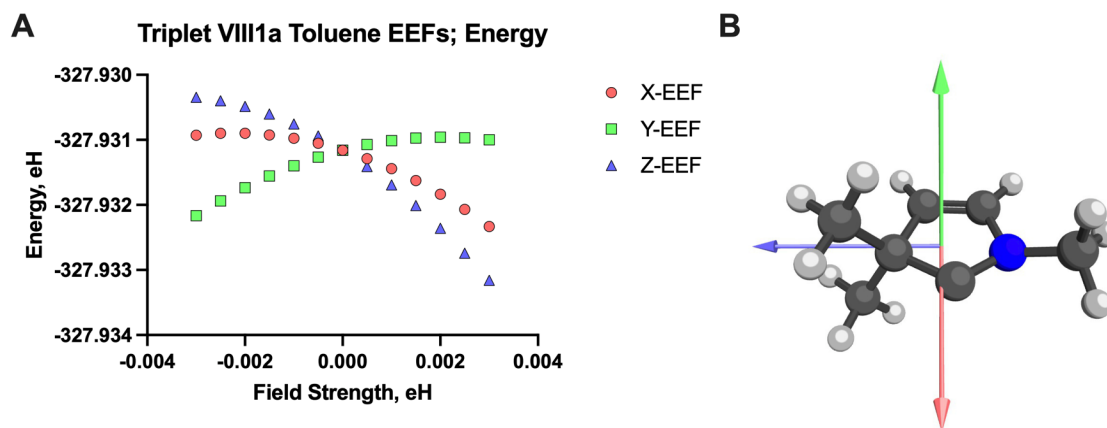

Figure S79.  $^3\text{VIII}_{1a}$  Energy under EEFs in Toluene. Axis definitions given in (B).

Table S78.  $^3\text{VIII}_{1a}$  Under EEFs in SMD Dichloromethane. Energy given in Hartree.

| Field   | Energy, X-EEF | Energy, Y-EEF | Energy, Z-EEF |
|---------|---------------|---------------|---------------|
| -0.0030 | -327.932928   | -327.934402   | -327.932392   |
| -0.0025 | -327.932900   | -327.934137   | -327.932438   |
| -0.0020 | -327.932904   | -327.933901   | -327.932522   |
| -0.0015 | -327.932939   | -327.933691   | -327.932643   |
| -0.0010 | -327.933004   | -327.933510   | -327.932801   |
| -0.0005 | -327.933101   | -327.933355   | -327.932996   |
| +0.0000 | -327.933229   | -327.933229   | -327.933229   |
| +0.0005 | -327.933388   | -327.933130   | -327.933499   |
| +0.0010 | -327.933578   | -327.933059   | -327.933806   |
| +0.0015 | -327.933799   | -327.933015   | -327.934151   |
| +0.0020 | -327.934051   | -327.932999   | -327.934533   |
| +0.0025 | -327.934334   | -327.933012   | -327.934952   |
| +0.0030 | -327.934649   | -327.933052   | -327.935409   |

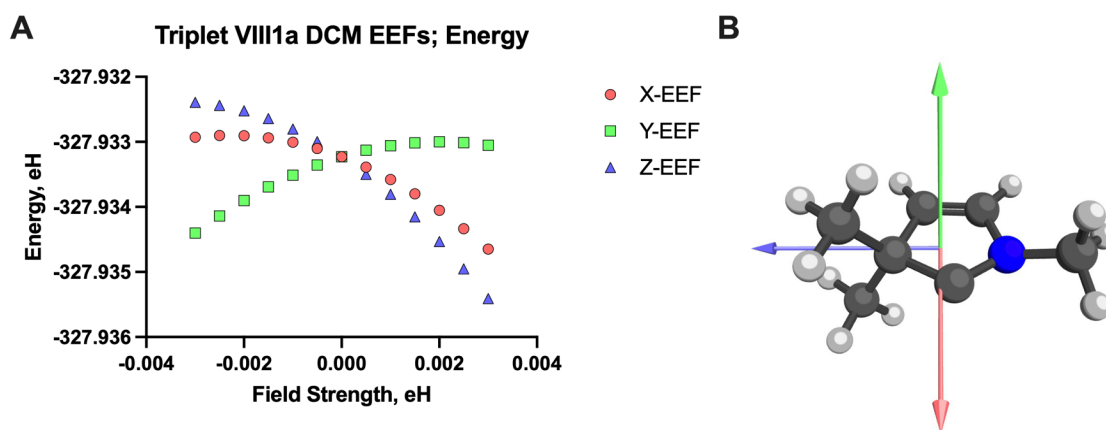

Figure S80.  $^3\text{VIII}_{1a}$  Energy under EEFs in DCM. Axis definitions given in (B).

Table S79.  ${}^3\text{VIII}_{1a}$  Under EEFs in SMD Acetonitrile. Energy given in Hartree.

| Field   | Energy, X-EEF | Energy, Y-EEF | Energy, Z-EEF |
|---------|---------------|---------------|---------------|
| -0.0030 | -327.931658   | -327.933237   | -327.931161   |
| -0.0025 | -327.931631   | -327.932956   | -327.931203   |
| -0.0020 | -327.931637   | -327.932705   | -327.931283   |
| -0.0015 | -327.931676   | -327.932483   | -327.931402   |
| -0.0010 | -327.931749   | -327.932290   | -327.931560   |
| -0.0005 | -327.931854   | -327.932127   | -327.931757   |
| +0.0000 | -327.931993   | -327.931993   | -327.931993   |
| +0.0005 | -327.932165   | -327.931888   | -327.932268   |
| +0.0010 | -327.932370   | -327.931814   | -327.932581   |
| +0.0015 | -327.932608   | -327.931768   | -327.932934   |
| +0.0020 | -327.932880   | -327.931753   | -327.933325   |
| +0.0025 | -327.933184   | -327.931767   | -327.933755   |
| +0.0030 | -327.933522   | -327.931811   | -327.934225   |

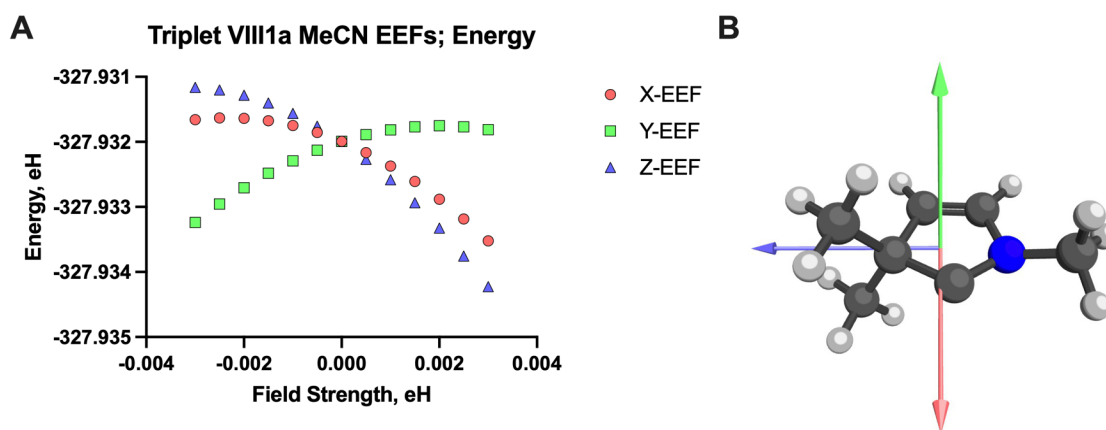

Figure S81.  ${}^3\text{VIII}_{1a}$  Energy under EEFs in MeCN. Axis definitions given in (B).

Table S80.  ${}^3\text{VIII}_{1a}$  Under EEFs in SMD Water. Energy given in Hartree.

| Field   | Energy, X-EEF | Energy, Y-EEF | Energy, Z-EEF |
|---------|---------------|---------------|---------------|
| -0.0030 | -327.922035   | -327.923637   | -327.921547   |
| -0.0025 | -327.922008   | -327.923352   | -327.921588   |
| -0.0020 | -327.922015   | -327.923098   | -327.921667   |
| -0.0015 | -327.922055   | -327.922873   | -327.921786   |
| -0.0010 | -327.922129   | -327.922678   | -327.921944   |
| -0.0005 | -327.922236   | -327.922512   | -327.922141   |
| +0.0000 | -327.922377   | -327.922377   | -327.922377   |
| +0.0005 | -327.922552   | -327.922271   | -327.922652   |
| +0.0010 | -327.922760   | -327.922196   | -327.922967   |
| +0.0015 | -327.923002   | -327.922150   | -327.923321   |
| +0.0020 | -327.923277   | -327.922135   | -327.923714   |
| +0.0025 | -327.923587   | -327.922149   | -327.924147   |
| +0.0030 | -327.923930   | -327.922194   | -327.924618   |

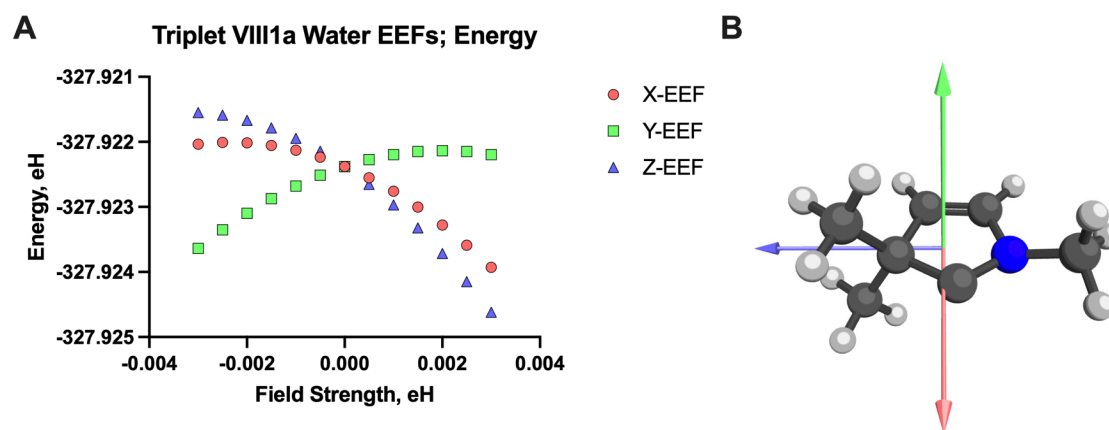

Figure S82.  ${}^3\text{VIII}_{1a}$  Energy under EEFs in Water. Axis definitions given in (B).



Table S81. IX<sub>1a</sub> Under EEFs in Gas. Energy given in Hartree.

| Field   | Energy, X-EEF | Energy, Y-EEF | Energy, Z-EEF |
|---------|---------------|---------------|---------------|
| -0.0030 | -320.817020   | -320.818120   | -320.820280   |
| -0.0025 | -320.817120   | -320.818050   | -320.819820   |
| -0.0020 | -320.817240   | -320.817990   | -320.819390   |
| -0.0015 | -320.817380   | -320.817950   | -320.818980   |
| -0.0010 | -320.817530   | -320.817920   | -320.818600   |
| -0.0005 | -320.817700   | -320.817900   | -320.818240   |
| +0.0000 | -320.817890   | -320.817890   | -320.817890   |
| +0.0005 | -320.818100   | -320.817900   | -320.817570   |
| +0.0010 | -320.818330   | -320.817920   | -320.817280   |
| +0.0015 | -320.818570   | -320.817950   | -320.817000   |
| +0.0020 | -320.818830   | -320.817990   | -320.816750   |
| +0.0025 | -320.819110   | -320.818050   | -320.816520   |
| +0.0030 | -320.819410   | -320.818120   | -320.816310   |

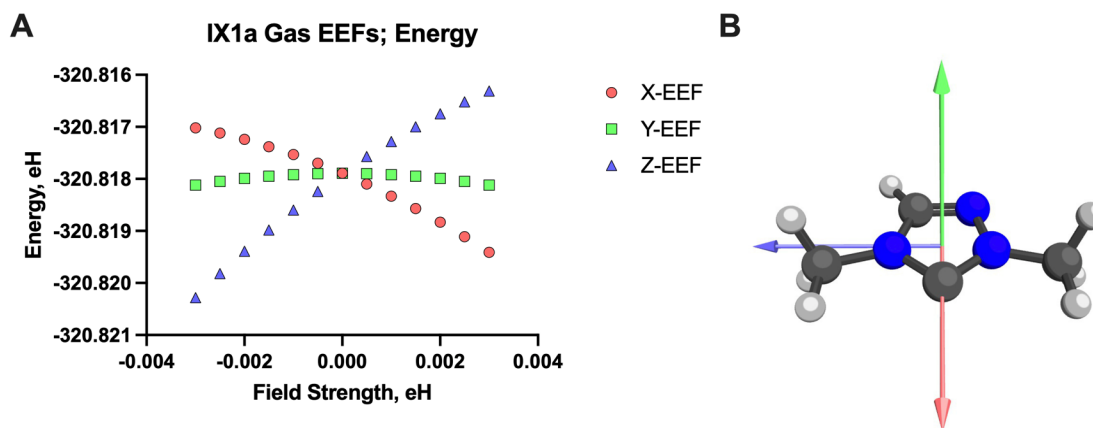

Figure S83. IX<sub>1a</sub> Energy under EEFs in Gas. Axis definitions given in (B).

Table S82. IX<sub>1a</sub> Under EEFs in SMD Toluene. Energy given in Hartree.

| Field   | Energy, X-EEF | Energy, Y-EEF | Energy, Z-EEF |
|---------|---------------|---------------|---------------|
| -0.0030 | -320.834909   | -320.836315   | -320.838881   |
| -0.0025 | -320.835047   | -320.836235   | -320.838346   |
| -0.0020 | -320.835207   | -320.836170   | -320.837837   |
| -0.0015 | -320.835387   | -320.836119   | -320.837353   |
| -0.0010 | -320.835589   | -320.836083   | -320.836895   |
| -0.0005 | -320.835811   | -320.836061   | -320.836462   |
| +0.0000 | -320.836054   | -320.836054   | -320.836054   |
| +0.0005 | -320.836318   | -320.836061   | -320.835672   |
| +0.0010 | -320.836603   | -320.836083   | -320.835315   |
| +0.0015 | -320.836909   | -320.836119   | -320.834983   |
| +0.0020 | -320.837236   | -320.836170   | -320.834677   |
| +0.0025 | -320.837584   | -320.836235   | -320.834396   |
| +0.0030 | -320.837953   | -320.836315   | -320.834141   |

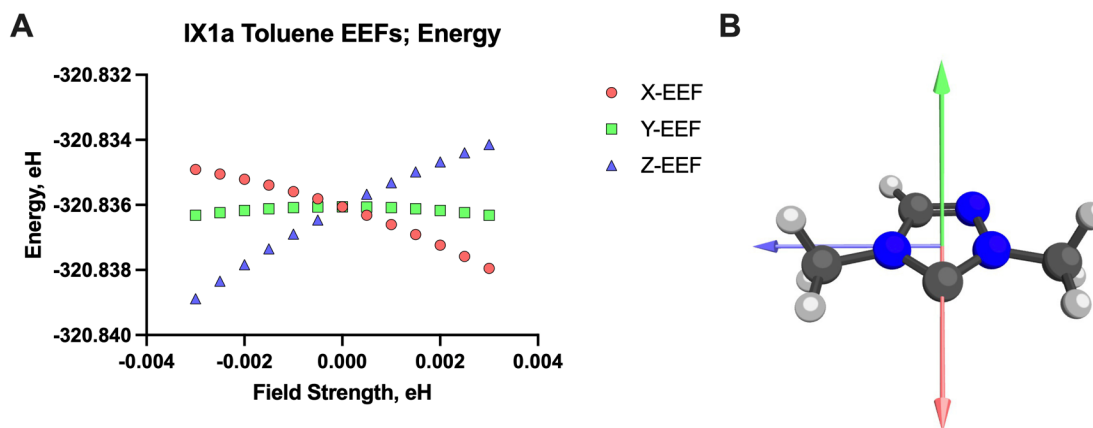

Figure S84. IX<sub>1a</sub> Energy under EEFs in Toluene. Axis definitions given in (B).

**Table S83. IX<sub>1a</sub> Under EEFs in SMD Dichloromethane.** Energy given in Hartree.

| Field   | Energy, X-EEF | Energy, Y-EEF | Energy, Z-EEF |
|---------|---------------|---------------|---------------|
| -0.0030 | -320.839211   | -320.840990   | -320.843916   |
| -0.0025 | -320.839396   | -320.840898   | -320.843308   |
| -0.0020 | -320.839606   | -320.840822   | -320.842728   |
| -0.0015 | -320.839840   | -320.840763   | -320.842176   |
| -0.0010 | -320.840098   | -320.840721   | -320.841652   |
| -0.0005 | -320.840381   | -320.840696   | -320.841156   |
| +0.0000 | -320.840688   | -320.840688   | -320.840688   |
| +0.0005 | -320.841019   | -320.840696   | -320.840247   |
| +0.0010 | -320.841375   | -320.840721   | -320.839835   |
| +0.0015 | -320.841755   | -320.840763   | -320.839451   |
| +0.0020 | -320.842159   | -320.840822   | -320.839095   |
| +0.0025 | -320.842588   | -320.840897   | -320.838766   |
| +0.0030 | -320.843042   | -320.840989   | -320.838466   |

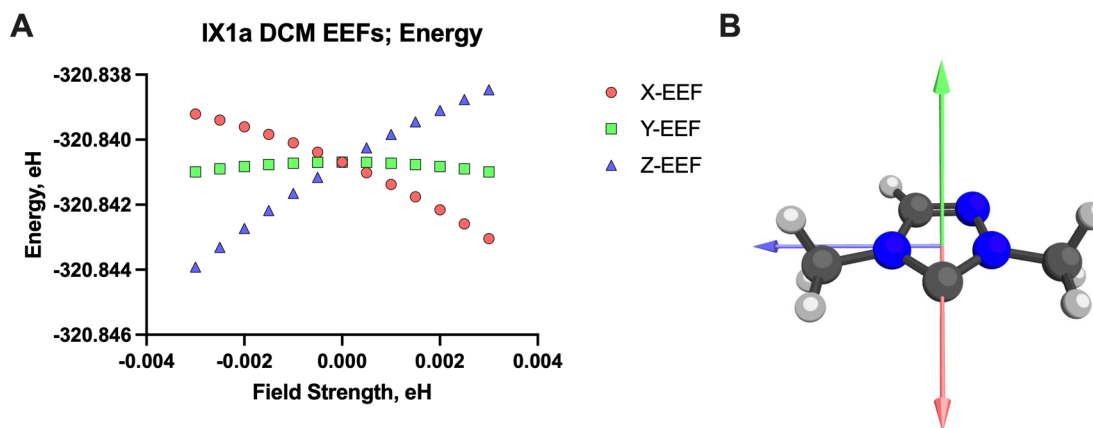

**Figure S85. IX<sub>1a</sub> Energy under EEFs in DCM.** Axis definitions given in (B).

Table S84. IX<sub>1a</sub> Under EEFs in SMD Acetonitrile. Energy given in Hartree.

| Field   | Energy, X-EEF | Energy, Y-EEF | Energy, Z-EEF |
|---------|---------------|---------------|---------------|
| -0.0030 | -320.839550   | -320.841494   | -320.844549   |
| -0.0025 | -320.839757   | -320.841396   | -320.843914   |
| -0.0020 | -320.839988   | -320.841315   | -320.843308   |
| -0.0015 | -320.840246   | -320.841253   | -320.842731   |
| -0.0010 | -320.840529   | -320.841208   | -320.842183   |
| -0.0005 | -320.840838   | -320.841182   | -320.841663   |
| +0.0000 | -320.841173   | -320.841173   | -320.841173   |
| +0.0005 | -320.841533   | -320.841182   | -320.840711   |
| +0.0010 | -320.841919   | -320.841208   | -320.840278   |
| +0.0015 | -320.842331   | -320.841253   | -320.839874   |
| +0.0020 | -320.842769   | -320.841315   | -320.839499   |
| +0.0025 | -320.843233   | -320.841395   | -320.839153   |
| +0.0030 | -320.843723   | -320.841493   | -320.838836   |

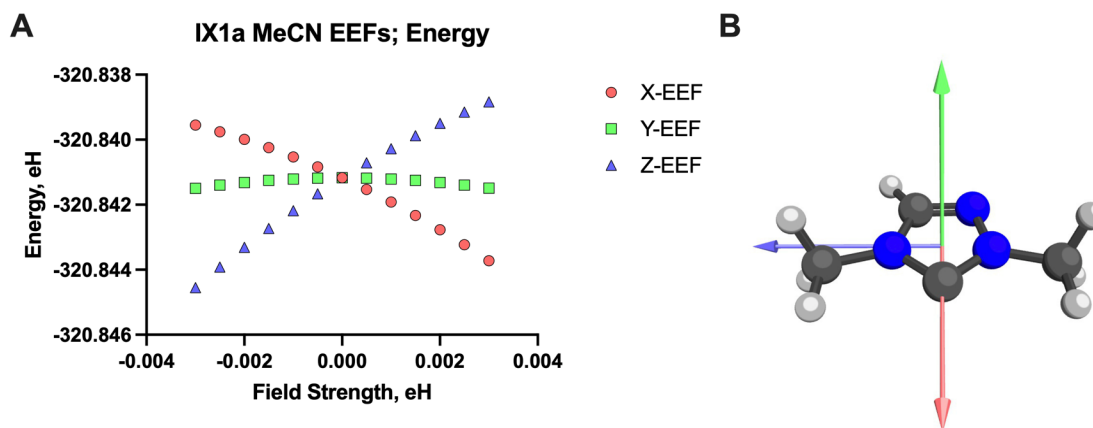

Figure S86. IX<sub>1a</sub> Energy under EEFs in MeCN. Axis definitions given in (B).

Table S85. IX<sub>1a</sub> Under EEFs in SMD Water. Energy given in Hartree.

| Field   | Energy, X-EEF | Energy, Y-EEF | Energy, Z-EEF |
|---------|---------------|---------------|---------------|
| -0.0030 | -320.825461   | -320.827439   | -320.830519   |
| -0.0025 | -320.825671   | -320.827339   | -320.829879   |
| -0.0020 | -320.825908   | -320.827258   | -320.829268   |
| -0.0015 | -320.826170   | -320.827195   | -320.828686   |
| -0.0010 | -320.826458   | -320.827150   | -320.828132   |
| -0.0005 | -320.826773   | -320.827122   | -320.827608   |
| +0.0000 | -320.827113   | -320.827113   | -320.827113   |
| +0.0005 | -320.827480   | -320.827122   | -320.826647   |
| +0.0010 | -320.827873   | -320.827149   | -320.826210   |
| +0.0015 | -320.828291   | -320.827194   | -320.825803   |
| +0.0020 | -320.828736   | -320.827258   | -320.825424   |
| +0.0025 | -320.829207   | -320.827339   | -320.825074   |
| +0.0030 | -320.829705   | -320.827438   | -320.824753   |

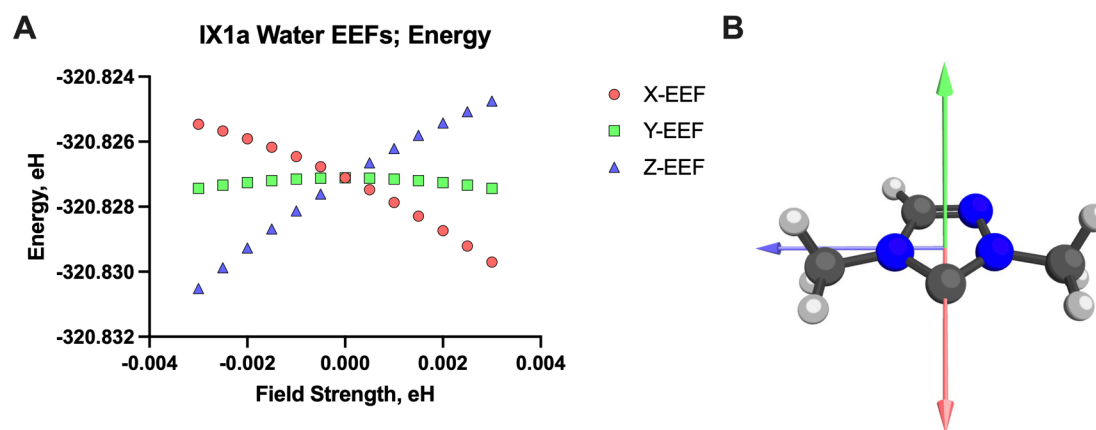

Figure S87. IX<sub>1a</sub> Energy under EEFs in Water. Axis definitions given in (B).

Table S86.  $^3IX_{1a}$  Under EEFs in Gas. Energy given in Hartree.

| Field   | Energy, X-EEF | Energy, Y-EEF | Energy, Z-EEF |
|---------|---------------|---------------|---------------|
| -0.0030 | -320.679890   | -320.678510   | -320.681760   |
| -0.0025 | -320.679650   | -320.678510   | -320.681190   |
| -0.0020 | -320.679420   | -320.678520   | -320.680650   |
| -0.0015 | -320.679220   | -320.678550   | -320.680130   |
| -0.0010 | -320.679030   | -320.678590   | -320.679640   |
| -0.0005 | -320.678870   | -320.678650   | -320.679170   |
| +0.0000 | -320.678720   | -320.678720   | -320.678720   |
| +0.0005 | -320.678590   | -320.678810   | -320.678290   |
| +0.0010 | -320.678480   | -320.678910   | -320.677890   |
| +0.0015 | -320.678380   | -320.679030   | -320.677520   |
| +0.0020 | -320.678310   | -320.679160   | -320.677160   |
| +0.0025 | -320.678250   | -320.679310   | -320.676840   |
| +0.0030 | -320.678210   | -320.679470   | -320.676530   |

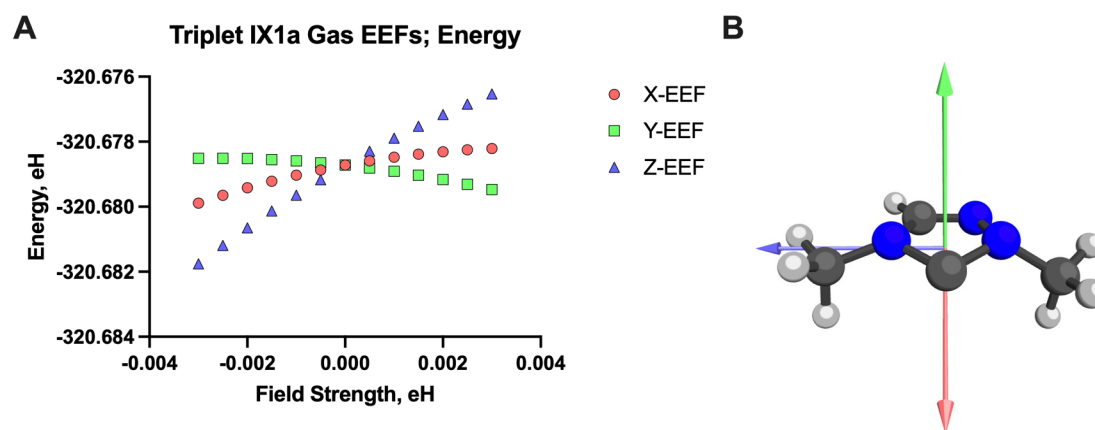

Figure S88.  $^3IX_{1a}$  Energy under EEFs in Gas. Axis definitions given in (B).

Table S87.  ${}^3IX_{1a}$  Under EEFs in SMD Toluene. Energy given in Hartree.

| Field   | Energy, X-EEF | Energy, Y-EEF | Energy, Z-EEF |
|---------|---------------|---------------|---------------|
| -0.0030 | -320.694880   | -320.693259   | -320.697148   |
| -0.0025 | -320.694599   | -320.693256   | -320.696475   |
| -0.0020 | -320.694339   | -320.693272   | -320.695829   |
| -0.0015 | -320.694101   | -320.693306   | -320.695210   |
| -0.0010 | -320.693884   | -320.693358   | -320.694618   |
| -0.0005 | -320.693689   | -320.693428   | -320.694053   |
| +0.0000 | -320.693516   | -320.693516   | -320.693516   |
| +0.0005 | -320.693364   | -320.693621   | -320.693005   |
| +0.0010 | -320.693235   | -320.693744   | -320.692522   |
| +0.0015 | -320.693127   | -320.693885   | -320.692065   |
| +0.0020 | -320.693042   | -320.694042   | -320.691636   |
| +0.0025 | -320.692979   | -320.694217   | -320.691233   |
| +0.0030 | -320.692938   | -320.694410   | -320.690858   |

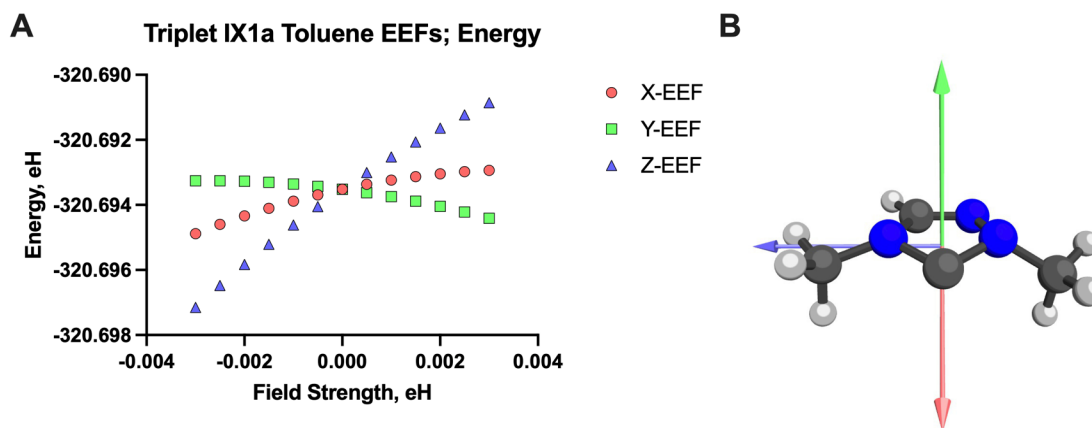

Figure S89.  ${}^3IX_{1a}$  Energy under EEFs in Toluene. Axis definitions given in (B).

Table S88.  $^3\text{IX}_{1a}$  Under EEFs in SMD Dichloromethane. Energy given in Hartree.

| Field   | Energy, X-EEF | Energy, Y-EEF | Energy, Z-EEF |
|---------|---------------|---------------|---------------|
| -0.0030 | -320.698132   | -320.696295   | -320.700754   |
| -0.0025 | -320.697812   | -320.696291   | -320.699985   |
| -0.0020 | -320.697517   | -320.696308   | -320.699246   |
| -0.0015 | -320.697247   | -320.696346   | -320.698537   |
| -0.0010 | -320.697003   | -320.696406   | -320.697858   |
| -0.0005 | -320.696783   | -320.696488   | -320.697209   |
| +0.0000 | -320.696590   | -320.696590   | -320.696590   |
| +0.0005 | -320.696421   | -320.696712   | -320.696000   |
| +0.0010 | -320.696278   | -320.696856   | -320.695440   |
| +0.0015 | -320.696161   | -320.697020   | -320.694910   |
| +0.0020 | -320.696070   | -320.697204   | -320.694411   |
| +0.0025 | -320.696004   | -320.697409   | -320.693941   |
| +0.0030 | -320.695965   | -320.697634   | -320.693501   |

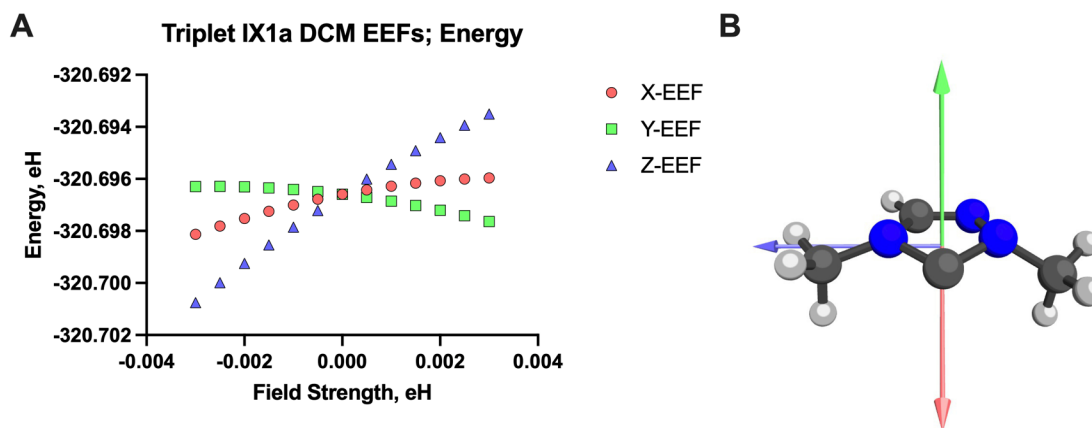

Figure S90.  $^3\text{IX}_{1a}$  Energy under EEFs in DCM. Axis definitions given in (B).



Table S89.  $^3IX_{1a}$  Under EEFs in SMD Acetonitrile. Energy given in Hartree.

| Field   | Energy, X-EEF | Energy, Y-EEF | Energy, Z-EEF |
|---------|---------------|---------------|---------------|
| -0.0030 | -320.698078   | -320.696165   | -320.700830   |
| -0.0025 | -320.697743   | -320.696158   | -320.700026   |
| -0.0020 | -320.697435   | -320.696175   | -320.699253   |
| -0.0015 | -320.697153   | -320.696214   | -320.698510   |
| -0.0010 | -320.696898   | -320.696276   | -320.697799   |
| -0.0005 | -320.696670   | -320.696361   | -320.697118   |
| +0.0000 | -320.696469   | -320.696469   | -320.696469   |
| +0.0005 | -320.696294   | -320.696599   | -320.695850   |
| +0.0010 | -320.696147   | -320.696750   | -320.695262   |
| +0.0015 | -320.696027   | -320.696924   | -320.694705   |
| +0.0020 | -320.695935   | -320.697120   | -320.694179   |
| +0.0025 | -320.695870   | -320.697337   | -320.693684   |
| +0.0030 | -320.695832   | -320.697576   | -320.693219   |

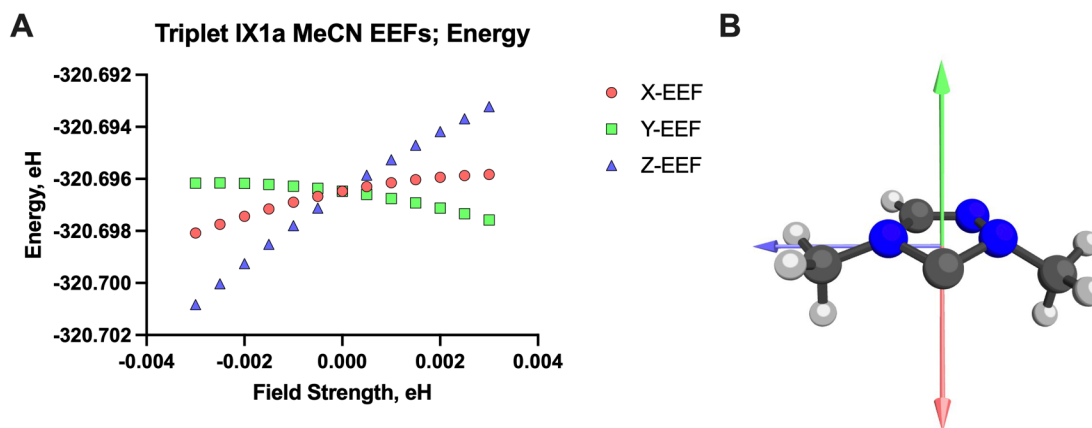

Figure S91.  $^3IX_{1a}$  Energy under EEFs in MeCN. Axis definitions given in (B).

Table 90.  ${}^3\text{IX}_{1a}$  Under EEFs in SMD Water. Energy given in Hartree.

| Field   | Energy, X-EEF | Energy, Y-EEF | Energy, Z-EEF |
|---------|---------------|---------------|---------------|
| -0.0030 | -320.686313   | -320.684385   | -320.689090   |
| -0.0025 | -320.685975   | -320.684378   | -320.688279   |
| -0.0020 | -320.685664   | -320.684394   | -320.687499   |
| -0.0015 | -320.685380   | -320.684433   | -320.686751   |
| -0.0010 | -320.685123   | -320.684496   | -320.686033   |
| -0.0005 | -320.684893   | -320.684582   | -320.685346   |
| +0.0000 | -320.684690   | -320.684690   | -320.684690   |
| +0.0005 | -320.684515   | -320.684822   | -320.684066   |
| +0.0010 | -320.684367   | -320.684975   | -320.683472   |
| +0.0015 | -320.684246   | -320.685151   | -320.682910   |
| +0.0020 | -320.684154   | -320.685349   | -320.682378   |
| +0.0025 | -320.684089   | -320.685569   | -320.681878   |
| +0.0030 | -320.684052   | -320.685811   | -320.681409   |

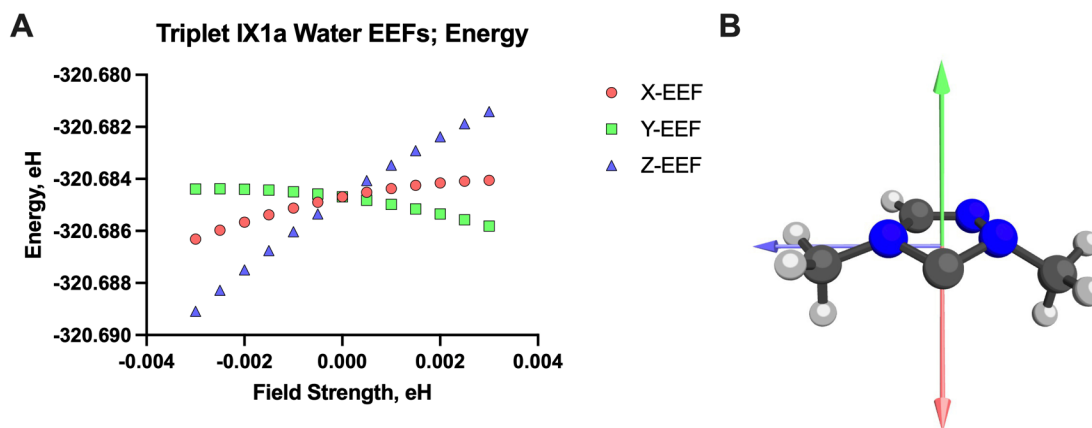

Figure S92.  ${}^3\text{IX}_{1a}$  Energy under EEFs in Water. Axis definitions given in (B).

## S4. Electronic Singlet-Triplet Gaps of NHCs in Test Set under EEFs Across Different Solvents

**Table S91.  $\Delta E_{ST}$  I<sub>1a</sub> Under EEFs in Gas.** Energy given in kJ/mol.

| Field   | $\Delta E$ , X-EEF | $\Delta E$ , Y-EEF | $\Delta E$ , Z-EEF |
|---------|--------------------|--------------------|--------------------|
| -0.0030 | -354.521265        | -359.509715        | -359.798520        |
| -0.0025 | -355.335170        | -359.483460        | -359.719755        |
| -0.0020 | -356.122820        | -359.483460        | -359.640990        |
| -0.0015 | -356.884215        | -359.430950        | -359.562225        |
| -0.0010 | -357.698120        | -359.404695        | -359.457205        |
| -0.0005 | -358.485770        | -359.325930        | -359.378440        |
| +0.0000 | -359.273420        | -359.273420        | -359.273420        |
| +0.0005 | -360.087325        | -359.194655        | -359.194655        |
| +0.0010 | -360.874975        | -359.142145        | -359.115890        |
| +0.0015 | -361.662625        | -359.010870        | -359.010870        |
| +0.0020 | -362.476530        | -358.932105        | -358.905850        |
| +0.0025 | -363.290435        | -358.800830        | -358.800830        |
| +0.0030 | -364.051830        | -358.669555        | -358.695810        |

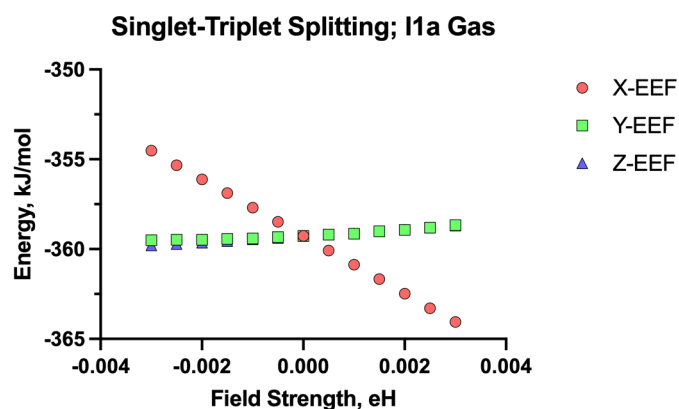

**Figure S93. I<sub>1a</sub> Singlet Triplet Splitting under EEFs in Gas.** Axis definitions given in S2.

**Table S92.  $\Delta E_{ST}$  I<sub>1a</sub> Under EEFs in Toluene.** Energy given in kJ/mol.

| Field   | $\Delta E$ , X-EEF | $\Delta E$ , Y-EEF | $\Delta E$ , Z-EEF |
|---------|--------------------|--------------------|--------------------|
| -0.0030 | -365.100476        | -371.239493        | -371.545755        |
| -0.0025 | -366.070454        | -371.224562        | -371.454889        |
| -0.0020 | -367.043204        | -371.196963        | -371.361317        |
| -0.0015 | -368.018722        | -371.156819        | -371.265155        |
| -0.0010 | -368.996996        | -371.104212        | -371.166473        |
| -0.0005 | -369.978009        | -371.039191        | -371.065333        |
| +0.0000 | -370.961752        | -370.961752        | -370.961752        |
| +0.0005 | -371.948205        | -370.871855        | -370.855742        |
| +0.0010 | -372.937341        | -370.769413        | -370.747280        |
| +0.0015 | -373.929145        | -370.654306        | -370.636321        |
| +0.0020 | -374.923584        | -370.526355        | -370.522805        |
| +0.0025 | -375.920631        | -370.385345        | -370.406630        |
| +0.0030 | -376.920251        | -370.230999        | -370.287666        |

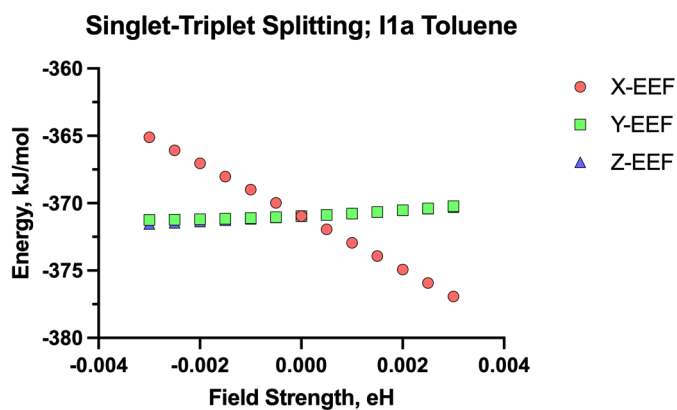

**Figure S94. I<sub>1a</sub> Singlet Triplet Splitting under EEFs in Toluene.** Axis definitions given in S2.

**Table S93.  $\Delta E_{ST}$  I<sub>1a</sub> Under EEFs in DCM. Energy given in kJ/mol.**

| Field   | $\Delta E$ , X-EEF | $\Delta E$ , Y-EEF | $\Delta E$ , Z-EEF |
|---------|--------------------|--------------------|--------------------|
| -0.0030 | -370.458533        | -377.942941        | -378.233689        |
| -0.0025 | -371.637343        | -377.921572        | -378.135789        |
| -0.0020 | -372.820176        | -377.885196        | -378.034127        |
| -0.0015 | -374.007030        | -377.833951        | -377.928803        |
| -0.0010 | -375.197891        | -377.767930        | -377.819905        |
| -0.0005 | -376.392749        | -377.687149        | -377.707489        |
| +0.0000 | -377.591583        | -377.591583        | -377.591583        |
| +0.0005 | -378.794372        | -377.481139        | -377.472194        |
| +0.0010 | -380.001089        | -377.355669        | -377.349307        |
| +0.0015 | -381.211702        | -377.214966        | -377.222882        |
| +0.0020 | -382.426166        | -377.058749        | -377.092851        |
| +0.0025 | -383.644445        | -376.886676        | -376.959121        |
| +0.0030 | -384.866476        | -376.698320        | -376.821566        |

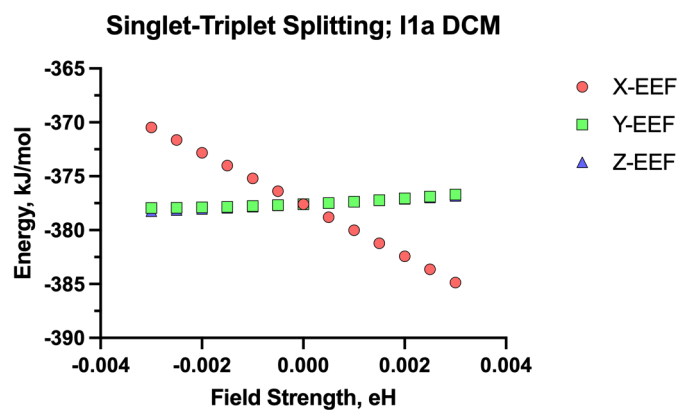

**Figure S95. I<sub>1a</sub> Singlet Triplet Splitting under EEFs in DCM. Axis definitions given in S2.**

**Table S94.  $\Delta E_{ST}$  I<sub>1a</sub> Under EEFs in MeCN.** Energy given in kJ/mol.

| Field   | $\Delta E$ , X-EEF | $\Delta E$ , Y-EEF | $\Delta E$ , Z-EEF |
|---------|--------------------|--------------------|--------------------|
| -0.0030 | -372.724993        | -380.786132        | -381.062649        |
| -0.0025 | -373.992509        | -380.761893        | -380.962371        |
| -0.0020 | -375.264637        | -380.721424        | -380.857850        |
| -0.0015 | -376.541378        | -380.664868        | -380.749201        |
| -0.0010 | -377.822725        | -380.592312        | -380.636504        |
| -0.0005 | -379.108663        | -380.503767        | -380.519819        |
| +0.0000 | -380.399180        | -380.399180        | -380.399180        |
| +0.0005 | -381.694245        | -380.278426        | -380.274587        |
| +0.0010 | -382.993836        | -380.141311        | -380.146032        |
| +0.0015 | -384.297909        | -379.987567        | -380.013471        |
| +0.0020 | -385.606421        | -379.816852        | -379.876842        |
| +0.0025 | -386.919315        | -379.628732        | -379.736050        |
| +0.0030 | -388.236529        | -379.422681        | -379.590970        |

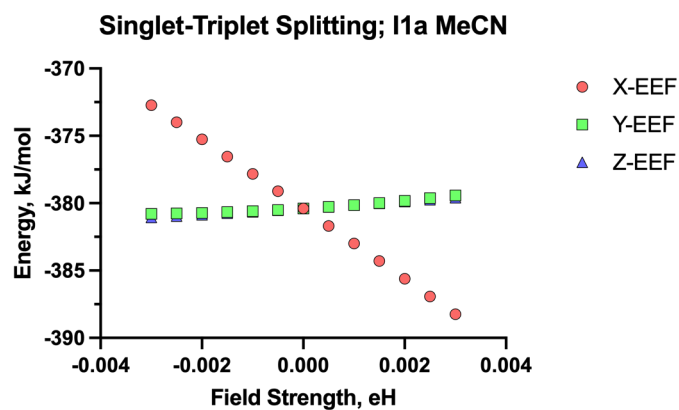

**Figure S96. I<sub>1a</sub> Singlet Triplet Splitting under EEFs in MeCN.** Axis definitions given in S2.

**Table S95.  $\Delta E_{ST} I_{1a}$  Under EEFs in Water.** Energy given in kJ/mol.

| Field   | $\Delta E, X\text{-EEF}$ | $\Delta E, Y\text{-EEF}$ | $\Delta E, Z\text{-EEF}$ |
|---------|--------------------------|--------------------------|--------------------------|
| -0.0030 | -363.143966              | -371.325901              | -371.598995              |
| -0.0025 | -364.430002              | -371.301085              | -371.498247              |
| -0.0020 | -365.720784              | -371.259752              | -371.393159              |
| -0.0015 | -367.016306              | -371.202054              | -371.283843              |
| -0.0010 | -368.316564              | -371.128072              | -371.170382              |
| -0.0005 | -369.621542              | -371.037818              | -371.052833              |
| +0.0000 | -370.931228              | -370.931228              | -370.931228              |
| +0.0005 | -372.245598              | -370.808174              | -370.805577              |
| +0.0010 | -373.564618              | -370.668444              | -370.675861              |
| +0.0015 | -374.888253              | -370.511765              | -370.542042              |
| +0.0020 | -376.216452              | -370.337771              | -370.404062              |
| +0.0025 | -377.549161              | -370.146007              | -370.261818              |
| +0.0030 | -378.886309              | -369.935922              | -370.115189              |

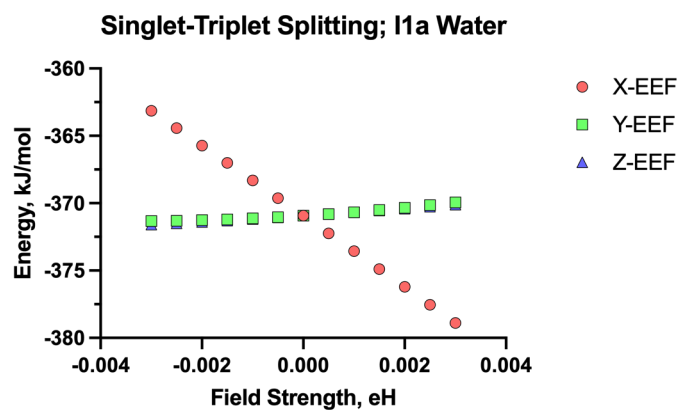

**Figure S97.  $I_{1a}$  Singlet Triplet Splitting under EEFs in Water.** Axis definitions given in S2.

**Table S96.  $\Delta E_{ST}$  II<sub>1a</sub> Under EEFs in Gas.** Energy given in kJ/mol.

| Field   | $\Delta E$ , X-EEF | $\Delta E$ , Y-EEF | $\Delta E$ , Z-EEF |
|---------|--------------------|--------------------|--------------------|
| -0.0030 | -159.767246        | -177.591154        | -177.582290        |
| -0.0025 | -162.738091        | -177.627008        | -177.620772        |
| -0.0020 | -165.716527        | -177.656172        | -177.652100        |
| -0.0015 | -168.702621        | -177.678730        | -177.676359        |
| -0.0010 | -171.696421        | -177.694748        | -177.693622        |
| -0.0005 | -174.697971        | -177.704268        | -177.703932        |
| +0.0000 | -177.707325        | -177.707325        | -177.707325        |
| +0.0005 | -180.724512        | -177.703919        | -177.703801        |
| +0.0010 | -183.749582        | -177.694047        | -177.693357        |
| +0.0015 | -186.782570        | -177.677677        | -177.675966        |
| +0.0020 | -189.823524        | -177.654767        | -177.651572        |
| +0.0025 | -192.872488        | -177.625251        | -177.620113        |
| +0.0030 | -195.929515        | -177.589048        | -177.581497        |

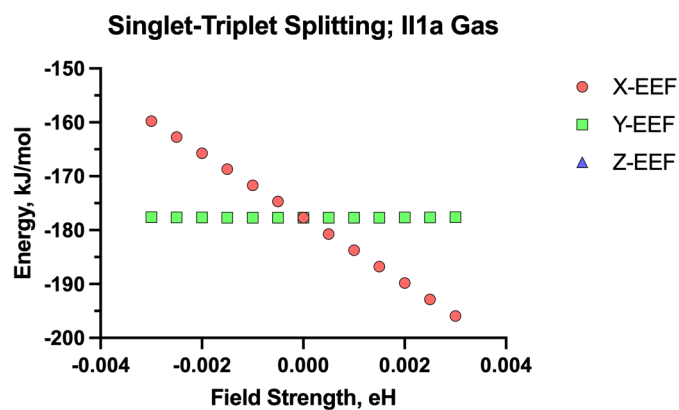

**Figure S98. II<sub>1a</sub> Singlet Triplet Splitting under EEFs in Gas.** Axis definitions given in S2.



**Table S97.  $\Delta E_{ST}$  II<sub>1a</sub> Under EEFs in Toluene.** Energy given in KJ/mol.

| Field   | $\Delta E$ , X-EEF | $\Delta E$ , Y-EEF | $\Delta E$ , Z-EEF |
|---------|--------------------|--------------------|--------------------|
| -0.0030 | -186.018292        | -207.896728        | -207.852349        |
| -0.0025 | -189.666325        | -207.940112        | -207.909205        |
| -0.0020 | -193.322916        | -207.975391        | -207.955513        |
| -0.0015 | -196.988198        | -208.002675        | -207.991396        |
| -0.0010 | -200.662284        | -208.022043        | -208.016937        |
| -0.0005 | -204.345269        | -208.033556        | -208.032209        |
| +0.0000 | -208.037245        | -208.037245        | -208.037245        |
| +0.0005 | -211.738286        | -208.033123        | -208.032057        |
| +0.0010 | -215.448464        | -208.021180        | -208.016635        |
| +0.0015 | -219.167850        | -208.001378        | -207.990939        |
| +0.0020 | -222.896504        | -207.973661        | -207.954907        |
| +0.0025 | -226.634489        | -207.937951        | -207.908446        |
| +0.0030 | -230.381865        | -207.894134        | -207.851438        |

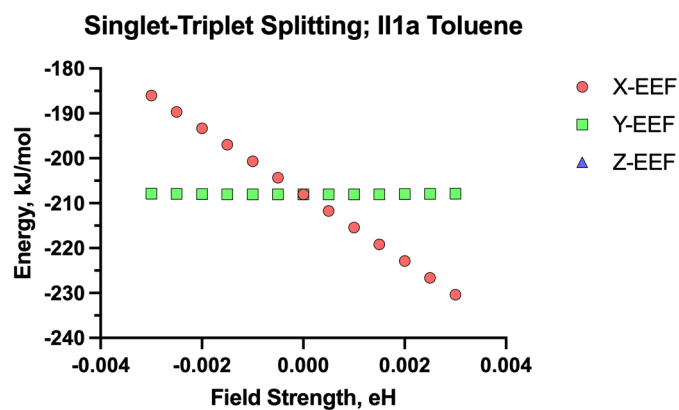

**Figure S99. II<sub>1a</sub> Singlet Triplet Splitting under EEFs in Toluene.** Axis definitions given in S2.

**Table S98.  $\Delta E_{ST}$  II<sub>1a</sub> Under EEFs in DCM.** Energy given in KJ/mol.

| Field   | $\Delta E$ , X-EEF | $\Delta E$ , Y-EEF | $\Delta E$ , Z-EEF |
|---------|--------------------|--------------------|--------------------|
| -0.0030 | -209.954390        | -235.992713        | -235.909637        |
| -0.0025 | -214.295749        | -236.044112        | -235.986291        |
| -0.0020 | -218.647316        | -236.085884        | -236.048752        |
| -0.0015 | -223.009277        | -236.118173        | -236.097166        |
| -0.0010 | -227.381800        | -236.141088        | -236.131641        |
| -0.0005 | -231.765025        | -236.154709        | -236.152265        |
| +0.0000 | -236.159078        | -236.159078        | -236.159078        |
| +0.0005 | -240.564066        | -236.154210        | -236.152097        |
| +0.0010 | -244.980088        | -236.140093        | -236.131305        |
| +0.0015 | -249.407233        | -236.116679        | -236.096659        |
| +0.0020 | -253.845575        | -236.083894        | -236.048080        |
| +0.0025 | -258.295188        | -236.041623        | -235.985448        |
| +0.0030 | -262.756133        | -235.989725        | -235.908626        |

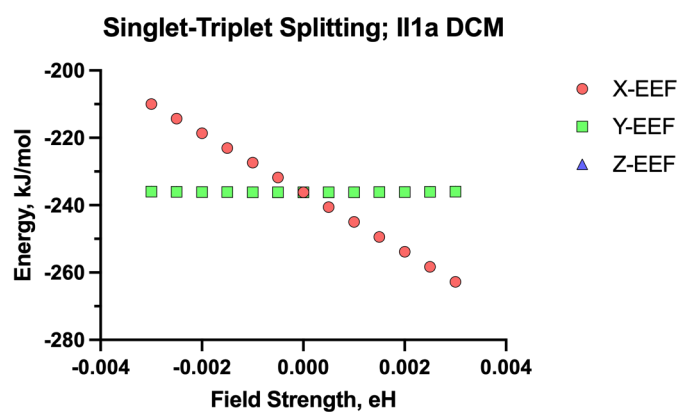

**Figure S100. II<sub>1a</sub> Singlet Triplet Splitting under EEFs in DCM.** Axis definitions given in S2.

**Table S99.  $\Delta E_{ST}$  II<sub>1a</sub> Under EEFs in MeCN.** Energy given in KJ/mol.

| Field   | $\Delta E$ , X-EEF | $\Delta E$ , Y-EEF | $\Delta E$ , Z-EEF |
|---------|--------------------|--------------------|--------------------|
| -0.0030 | -219.325417        | -247.051130        | -246.953005        |
| -0.0025 | -223.947791        | -247.106263        | -247.037950        |
| -0.0020 | -228.581231        | -247.151049        | -247.107177        |
| -0.0015 | -233.225948        | -247.185653        | -247.160839        |
| -0.0010 | -237.882128        | -247.210209        | -247.199061        |
| -0.0005 | -242.549926        | -247.224802        | -247.221929        |
| +0.0000 | -247.229485        | -247.229485        | -247.229485        |
| +0.0005 | -251.920926        | -247.224282        | -247.221756        |
| +0.0010 | -256.624346        | -247.209167        | -247.198717        |
| +0.0015 | -261.339844        | -247.184091        | -247.160325        |
| +0.0020 | -266.067493        | -247.148967        | -247.106489        |
| +0.0025 | -270.807358        | -247.103661        | -247.037091        |
| +0.0030 | -275.559497        | -247.048006        | -246.951975        |

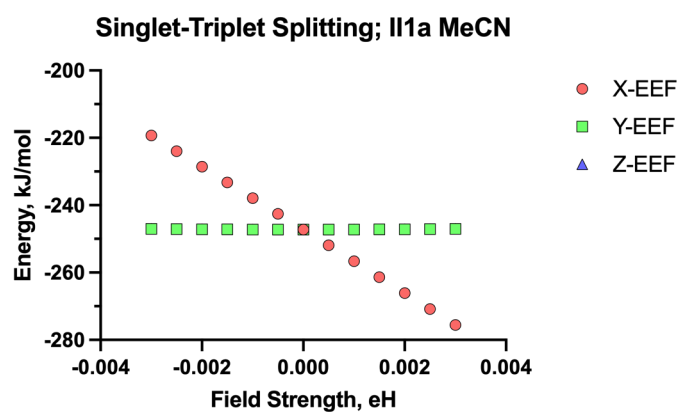

**Figure S101. II<sub>1a</sub> Singlet Triplet Splitting under EEFs in MeCN.** Axis definitions given in S2.

**Table S100.  $\Delta E_{ST}$   $II_{1a}$  Under EEFs in Water.** Energy given in KJ/mol.

| Field   | $\Delta E$ , X-EEF | $\Delta E$ , Y-EEF | $\Delta E$ , Z-EEF |
|---------|--------------------|--------------------|--------------------|
| -0.0030 | -217.896557        | -245.970183        | -245.869091        |
| -0.0025 | -222.576870        | -246.026145        | -245.955761        |
| -0.0020 | -227.268439        | -246.071601        | -246.026395        |
| -0.0015 | -231.971479        | -246.106719        | -246.081152        |
| -0.0010 | -236.686184        | -246.131638        | -246.120151        |
| -0.0005 | -241.412711        | -246.146446        | -246.143487        |
| +0.0000 | -246.151201        | -246.151201        | -246.151201        |
| +0.0005 | -250.901778        | -246.145921        | -246.143314        |
| +0.0010 | -255.664545        | -246.130588        | -246.119807        |
| +0.0015 | -260.439597        | -246.105144        | -246.080635        |
| +0.0020 | -265.227004        | -246.069500        | -246.025707        |
| +0.0025 | -270.026839        | -246.023520        | -245.954902        |
| +0.0030 | -274.839146        | -245.967030        | -245.868061        |

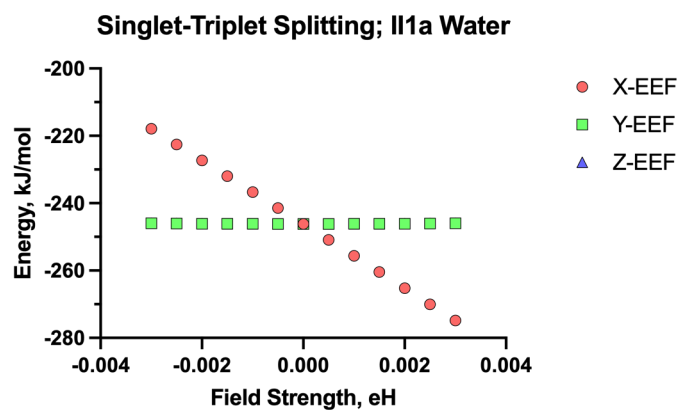

**Figure S102.  $II_{1a}$  Singlet Triplet Splitting under EEFs in Water.** Axis definitions given in S2.

**Table S101.  $\Delta E_{ST}$  III<sub>1a</sub> Under EEFs in Gas.** Energy given in KJ/mol.

| Field   | $\Delta E$ , X-EEF | $\Delta E$ , Y-EEF | $\Delta E$ , Z-EEF |
|---------|--------------------|--------------------|--------------------|
| -0.0030 | -252.25804         | -266.461995        | -273.47208         |
| -0.0025 | -255.014815        | -266.85582         | -272.68443         |
| -0.0020 | -257.745335        | -267.249645        | -271.89678         |
| -0.0015 | -260.475855        | -267.617215        | -271.082875        |
| -0.0010 | -263.206375        | -267.984785        | -270.32148         |
| -0.0005 | -265.96315         | -268.352355        | -269.48132         |
| +0.0000 | -268.69367         | -268.69367         | -268.69367         |
| +0.0005 | -271.42419         | -269.06124         | -267.879765        |
| +0.0010 | -274.15471         | -269.3763          | -267.092115        |
| +0.0015 | -276.88523         | -269.717615        | -266.251955        |
| +0.0020 | -279.61575         | -270.032675        | -265.464305        |
| +0.0025 | -282.320015        | -270.347735        | -264.6504          |
| +0.0030 | -285.050535        | -270.662795        | -263.836495        |

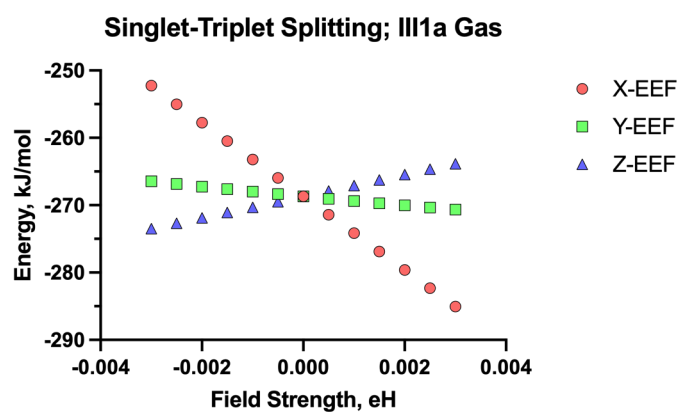

**Figure S103. III<sub>1a</sub> Singlet Triplet Splitting under EEFs in Gas.** Axis definitions given in S2.

**Table S102.  $\Delta E_{ST}$  III<sub>1a</sub> Under EEFs in Toluene.** Energy given in KJ/mol.

| Field   | $\Delta E$ , X-EEF | $\Delta E$ , Y-EEF | $\Delta E$ , Z-EEF |
|---------|--------------------|--------------------|--------------------|
| -0.0030 | -271.060545        | -288.442227        | -297.042325        |
| -0.0025 | -274.423401        | -288.922628        | -296.074721        |
| -0.0020 | -277.782392        | -289.393036        | -295.103168        |
| -0.0015 | -281.137456        | -289.853640        | -294.127708        |
| -0.0010 | -284.488505        | -290.304591        | -293.148354        |
| -0.0005 | -287.835408        | -290.746016        | -292.165120        |
| +0.0000 | -291.178006        | -291.178006        | -291.178006        |
| +0.0005 | -294.516087        | -291.600625        | -290.186998        |
| +0.0010 | -297.849406        | -292.013915        | -289.192067        |
| +0.0015 | -301.177669        | -292.417882        | -288.193188        |
| +0.0020 | -304.500530        | -292.812516        | -287.190310        |
| +0.0025 | -307.817590        | -293.197771        | -286.183373        |
| +0.0030 | -311.128385        | -293.573572        | -285.172314        |

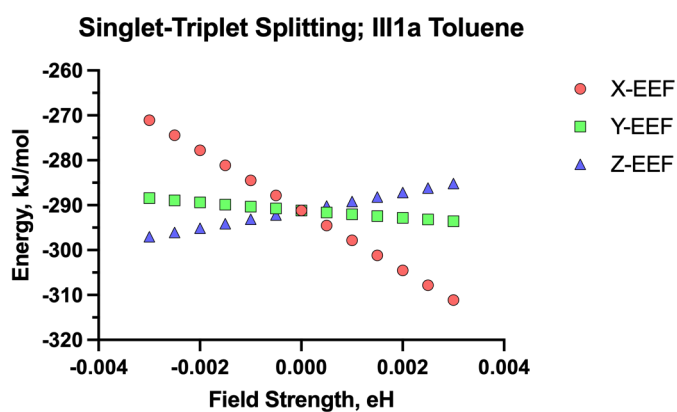

**Figure S104. III<sub>1a</sub> Singlet Triplet Splitting under EEFs in Toluene.** Axis definitions given in S2.

**Table S103.  $\Delta E_{ST}$  III<sub>1a</sub> Under EEFs in DCM.** Energy given in KJ/mol.

| Field   | $\Delta E$ , X-EEF | $\Delta E$ , Y-EEF | $\Delta E$ , Z-EEF |
|---------|--------------------|--------------------|--------------------|
| -0.0030 | -287.353978        | -308.041479        | -318.403871        |
| -0.0025 | -291.384262        | -308.639613        | -317.256611        |
| -0.0020 | -295.408203        | -309.224430        | -316.103754        |
| -0.0015 | -299.425675        | -309.796290        | -314.945342        |
| -0.0010 | -303.436484        | -310.355498        | -313.781395        |
| -0.0005 | -307.440355        | -310.902303        | -312.611926        |
| +0.0000 | -311.436926        | -311.436926        | -311.436926        |
| +0.0005 | -315.425743        | -311.959529        | -310.256377        |
| +0.0010 | -319.406245        | -312.470246        | -309.070245        |
| +0.0015 | -323.377749        | -312.969165        | -307.878483        |
| +0.0020 | -327.339432        | -313.456342        | -306.681029        |
| +0.0025 | -331.290308        | -313.931791        | -305.477812        |
| +0.0030 | -335.229191        | -314.395491        | -304.268738        |

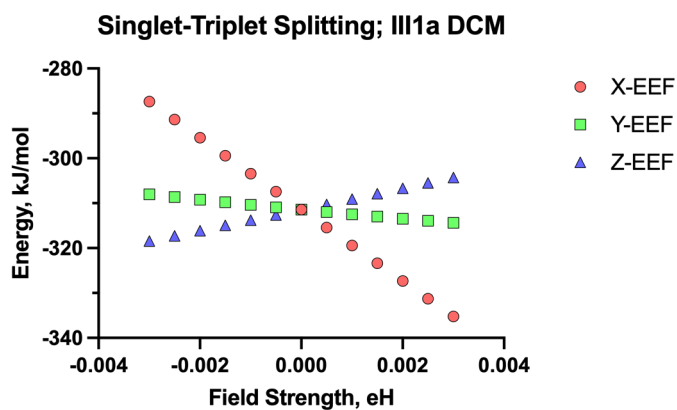

**Figure S105. III<sub>1a</sub> Singlet Triplet Splitting under EEFs in DCM.** Axis definitions given in S2.

**Table S104.  $\Delta E_{ST}$  III<sub>1a</sub> Under EEFs in MeCN.** Energy given in KJ/mol.

| Field   | $\Delta E$ , X-EEF | $\Delta E$ , Y-EEF | $\Delta E$ , Z-EEF |
|---------|--------------------|--------------------|--------------------|
| -0.0030 | -293.799518        | -315.819006        | -326.953426        |
| -0.0025 | -298.110350        | -316.477324        | -325.734813        |
| -0.0020 | -302.413647        | -317.120277        | -324.509860        |
| -0.0015 | -306.709266        | -317.748347        | -323.278600        |
| -0.0010 | -310.996965        | -318.361952        | -322.041055        |
| -0.0005 | -315.276402        | -318.961440        | -320.797229        |
| +0.0000 | -319.547111        | -319.547111        | -319.547111        |
| +0.0005 | -323.808507        | -320.119207        | -318.290678        |
| +0.0010 | -328.059843        | -320.677924        | -317.027883        |
| +0.0015 | -332.300201        | -321.223409        | -315.758672        |
| +0.0020 | -336.528454        | -321.755760        | -314.482973        |
| +0.0025 | -340.743213        | -322.275045        | -313.200694        |
| +0.0030 | -344.942787        | -322.781270        | -311.911739        |

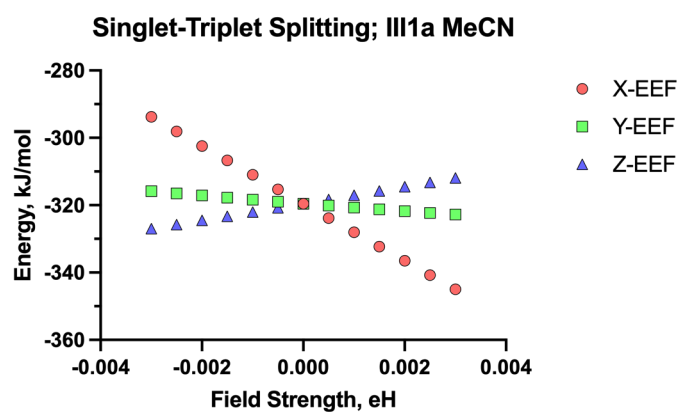

**Figure S106. III<sub>1a</sub> Singlet Triplet Splitting under EEFs in MeCN.** Axis definitions given in S2.



**Table S105.  $\Delta E_{ST}$  III<sub>1a</sub> Under EEFs in Water.** Energy given in KJ/mol.

| Field   | $\Delta E$ , X-EEF | $\Delta E$ , Y-EEF | $\Delta E$ , Z-EEF |
|---------|--------------------|--------------------|--------------------|
| -0.0030 | -290.153969        | -312.445931        | -323.745052        |
| -0.0025 | -294.523360        | -313.117873        | -322.511867        |
| -0.0020 | -298.884959        | -313.773954        | -321.272177        |
| -0.0015 | -303.238615        | -314.414678        | -320.026020        |
| -0.0010 | -307.584080        | -315.040503        | -318.773421        |
| -0.0005 | -311.920994        | -315.651796        | -317.514378        |
| +0.0000 | -316.248879        | -316.248879        | -316.248879        |
| +0.0005 | -320.567107        | -316.832013        | -314.976895        |
| +0.0010 | -324.874896        | -317.401408        | -313.698384        |
| +0.0015 | -329.171270        | -317.957231        | -312.413289        |
| +0.0020 | -333.455028        | -318.499591        | -311.121527        |
| +0.0025 | -337.724687        | -319.028564        | -309.823015        |
| +0.0030 | -341.978424        | -319.544168        | -308.517637        |

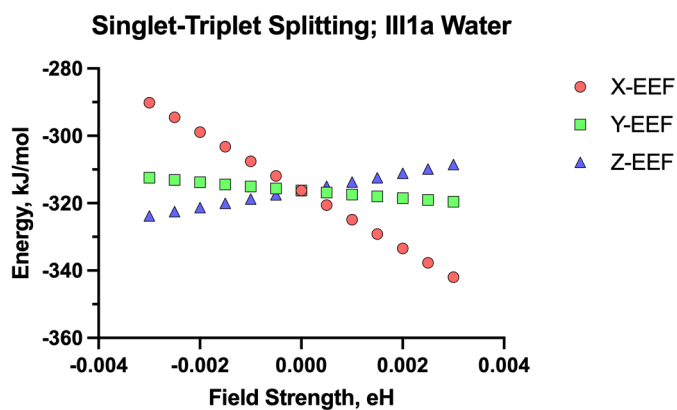

**Figure S107. III<sub>1a</sub> Singlet Triplet Splitting under EEFs in Water.** Axis definitions given in S2.

**Table S106.  $\Delta E_{ST}$  IV<sub>1a</sub> Under EEFs in Gas.** Energy given in KJ/mol.

| Field   | $\Delta E$ , X-EEF | $\Delta E$ , Y-EEF | $\Delta E$ , Z-EEF |
|---------|--------------------|--------------------|--------------------|
| -0.0030 | -327.636145        | -330.077860        | -328.843875        |
| -0.0025 | -328.476305        | -330.576705        | -329.500250        |
| -0.0020 | -329.316465        | -330.996785        | -330.156625        |
| -0.0015 | -330.156625        | -331.443120        | -330.813000        |
| -0.0010 | -331.049295        | -331.863200        | -331.469375        |
| -0.0005 | -331.889455        | -332.335790        | -332.099495        |
| +0.0000 | -332.729615        | -332.729615        | -332.729615        |
| +0.0005 | -333.622285        | -333.175950        | -333.412245        |
| +0.0010 | -334.462445        | -333.569775        | -334.042365        |
| +0.0015 | -335.328860        | -334.016110        | -334.698740        |
| +0.0020 | -336.221530        | -334.409935        | -335.355115        |
| +0.0025 | -337.087945        | -334.830015        | -335.985235        |
| +0.0030 | -337.980615        | -335.197585        | -336.641610        |

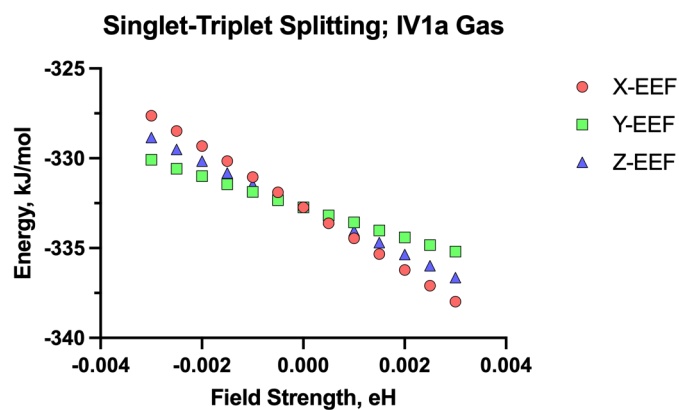

**Figure S108. IV<sub>1a</sub> Singlet Triplet Splitting under EEFs in Gas.** Axis definitions given in S2.

**Table S107.  $\Delta E_{ST}$  IV<sub>1a</sub> Under EEFs in Toluene.** Energy given in KJ/mol.

| Field   | $\Delta E$ , X-EEF | $\Delta E$ , Y-EEF | $\Delta E$ , Z-EEF |
|---------|--------------------|--------------------|--------------------|
| -0.0030 | -337.094876        | -340.072902        | -338.659233        |
| -0.0025 | -338.106975        | -340.611621        | -339.420179        |
| -0.0020 | -339.122366        | -341.144455        | -340.180469        |
| -0.0015 | -340.141023        | -341.671385        | -340.940170        |
| -0.0010 | -341.162923        | -342.192371        | -341.699342        |
| -0.0005 | -342.188031        | -342.707368        | -342.458046        |
| +0.0000 | -343.216319        | -343.216319        | -343.216319        |
| +0.0005 | -344.247757        | -343.719157        | -343.974211        |
| +0.0010 | -345.282306        | -344.215805        | -344.731755        |
| +0.0015 | -346.319928        | -344.706169        | -345.488983        |
| +0.0020 | -347.360581        | -345.190149        | -346.245925        |
| +0.0025 | -348.404223        | -345.667620        | -347.002608        |
| +0.0030 | -349.450802        | -346.138453        | -347.759051        |

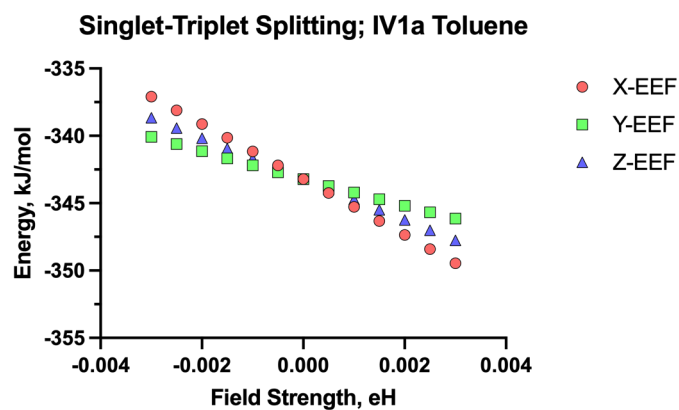

**Figure S109. IV<sub>1a</sub> Singlet Triplet Splitting under EEFs in Toluene.** Axis definitions given in S2.

**Table S108.  $\Delta E_{ST}$  IV<sub>1a</sub> Under EEFs in DCM.** Energy given in KJ/mol.

| Field   | $\Delta E$ , X-EEF | $\Delta E$ , Y-EEF | $\Delta E$ , Z-EEF |
|---------|--------------------|--------------------|--------------------|
| -0.0030 | -344.189794        | -347.758980        | -346.230679        |
| -0.0025 | -345.380891        | -348.382788        | -347.094644        |
| -0.0020 | -346.576195        | -348.999741        | -347.957468        |
| -0.0015 | -347.775668        | -349.609837        | -348.819222        |
| -0.0010 | -348.979273        | -350.213053        | -349.679974        |
| -0.0005 | -350.186966        | -350.809357        | -350.539781        |
| +0.0000 | -351.398695        | -351.398695        | -351.398695        |
| +0.0005 | -352.614406        | -351.981012        | -352.256763        |
| +0.0010 | -353.834038        | -352.562225        | -353.114029        |
| +0.0015 | -355.057518        | -353.124250        | -353.970524        |
| +0.0020 | -356.284777        | -353.684964        | -354.826282        |
| +0.0025 | -357.515729        | -354.238252        | -355.681337        |
| +0.0030 | -358.750273        | -354.783957        | -356.535704        |

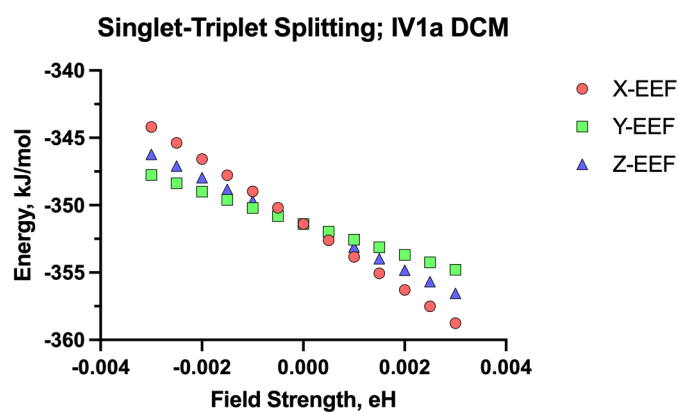

**Figure S110. IV<sub>1a</sub> Singlet Triplet Splitting under EEFs in DCM.** Axis definitions given in S2.

**Table S109.  $\Delta E_{ST}$  IV<sub>1a</sub> Under EEFs in MeCN.** Energy given in KJ/mol.

| Field   | $\Delta E$ , X-EEF | $\Delta E$ , Y-EEF | $\Delta E$ , Z-EEF |
|---------|--------------------|--------------------|--------------------|
| -0.0030 | -346.753516        | -350.535013        | -348.987362        |
| -0.0025 | -348.013386        | -351.194384        | -349.889523        |
| -0.0020 | -349.277850        | -351.846395        | -350.790285        |
| -0.0015 | -350.546864        | -352.491052        | -351.689721        |
| -0.0010 | -351.820387        | -353.128348        | -352.587902        |
| -0.0005 | -353.098365        | -353.758258        | -353.484888        |
| +0.0000 | -354.380735        | -354.380735        | -354.380735        |
| +0.0005 | -355.667430        | -354.995722        | -355.275487        |
| +0.0010 | -356.958380        | -355.603142        | -356.169194        |
| +0.0015 | -358.253497        | -356.202908        | -357.061890        |
| +0.0020 | -359.552687        | -356.794903        | -357.953610        |
| +0.0025 | -360.855840        | -357.378996        | -358.844387        |
| +0.0030 | -362.162841        | -357.955036        | -359.734243        |

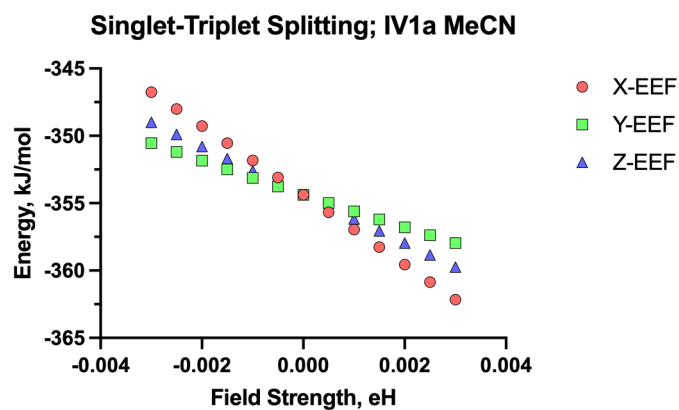

**Figure S111. IV<sub>1a</sub> Singlet Triplet Splitting under EEFs in MeCN.** Axis definitions given in S2.

**Table S110.  $\Delta E_{ST}$  IV<sub>1a</sub> Under EEFs in Water.** Energy given in KJ/mol.

| Field   | $\Delta E$ , X-EEF | $\Delta E$ , Y-EEF | $\Delta E$ , Z-EEF |
|---------|--------------------|--------------------|--------------------|
| -0.0030 | -340.993930        | -344.852165        | -343.360057        |
| -0.0025 | -342.273255        | -345.517864        | -344.259926        |
| -0.0020 | -343.557282        | -346.176447        | -345.158380        |
| -0.0015 | -344.845972        | -346.827915        | -346.055498        |
| -0.0010 | -346.139275        | -347.472262        | -346.951347        |
| -0.0005 | -347.437138        | -348.109474        | -347.845997        |
| +0.0000 | -348.739504        | -348.739504        | -348.739504        |
| +0.0005 | -350.046297        | -349.362305        | -349.631920        |
| +0.0010 | -351.357451        | -349.977803        | -350.523290        |
| +0.0015 | -352.672866        | -350.585916        | -351.413663        |
| +0.0020 | -353.992447        | -351.186544        | -352.303069        |
| +0.0025 | -355.316085        | -351.779555        | -353.191549        |
| +0.0030 | -356.643654        | -352.364816        | -354.079133        |

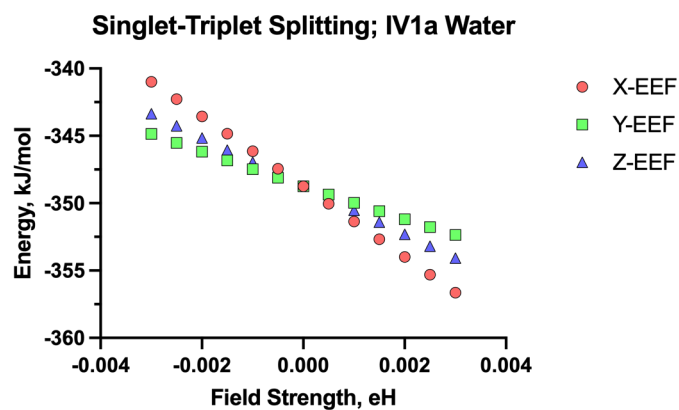

**Figure S112. IV<sub>1a</sub> Singlet Triplet Splitting under EEFs in Water.** Axis definitions given in S2.

**Table S111.  $\Delta E_{ST} V_{1a}$  Under EEFs in Gas.** Energy given in KJ/mol.

| Field   | $\Delta E, X\text{-EEF}$ | $\Delta E, Y\text{-EEF}$ | $\Delta E, Z\text{-EEF}$ |
|---------|--------------------------|--------------------------|--------------------------|
| -0.0030 | -276.832720              | -281.479855              | -283.107665              |
| -0.0025 | -277.856665              | -281.716150              | -283.081410              |
| -0.0020 | -278.880610              | -281.978700              | -283.081410              |
| -0.0015 | -279.878300              | -282.214995              | -283.028900              |
| -0.0010 | -280.902245              | -282.477545              | -283.002645              |
| -0.0005 | -281.926190              | -282.713840              | -282.976390              |
| +0.0000 | -282.950135              | -282.950135              | -282.950135              |
| +0.0005 | -283.947825              | -283.186430              | -282.897625              |
| +0.0010 | -284.998025              | -283.396470              | -282.871370              |
| +0.0015 | -286.021970              | -283.632765              | -282.792605              |
| +0.0020 | -287.045915              | -283.842805              | -282.766350              |
| +0.0025 | -288.069860              | -284.052845              | -282.713840              |
| +0.0030 | -289.093805              | -284.262885              | -282.661330              |

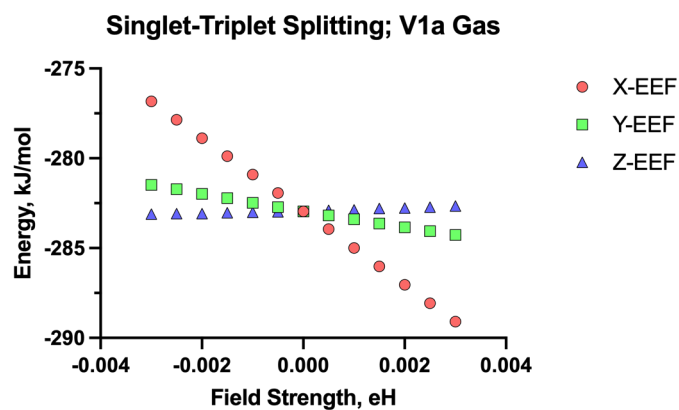

**Figure S113.  $V_{1a}$  Singlet Triplet Splitting under EEFs in Gas.** Axis definitions given in S2.

**Table S112.  $\Delta E_{ST} V_{1a}$  Under EEFs in Toluene.** Energy given in KJ/mol.

| Field   | $\Delta E, X\text{-EEF}$ | $\Delta E, Y\text{-EEF}$ | $\Delta E, Z\text{-EEF}$ |
|---------|--------------------------|--------------------------|--------------------------|
| -0.0030 | -282.272184              | -287.927561              | -289.947085              |
| -0.0025 | -283.508280              | -288.237115              | -289.918876              |
| -0.0020 | -284.746287              | -288.542169              | -289.886514              |
| -0.0015 | -285.986169              | -288.842694              | -289.850062              |
| -0.0010 | -287.227888              | -289.138649              | -289.809574              |
| -0.0005 | -288.471404              | -289.429992              | -289.765095              |
| +0.0000 | -289.716668              | -289.716671              | -289.716671              |
| +0.0005 | -290.963636              | -289.998626              | -289.664326              |
| +0.0010 | -292.212258              | -290.275795              | -289.608104              |
| +0.0015 | -293.462479              | -290.548114              | -289.548022              |
| +0.0020 | -294.714247              | -290.815492              | -289.484099              |
| +0.0025 | -295.967495              | -291.077848              | -289.416353              |
| +0.0030 | -297.222161              | -291.335087              | -289.344795              |

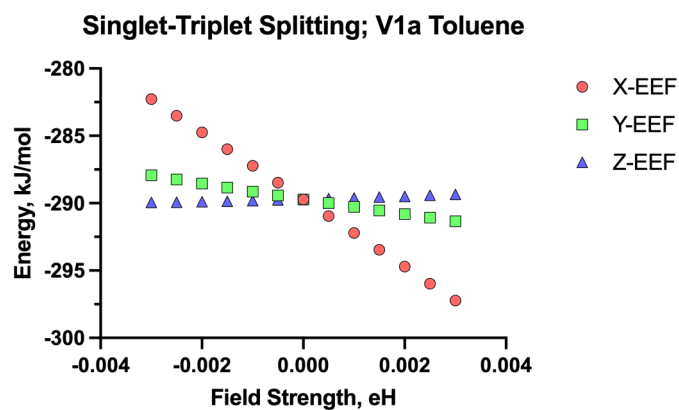

**Figure S114.  $V_{1a}$  Singlet Triplet Splitting under EEFs in Toluene.** Axis definitions given in S2.



**Table S113.  $\Delta E_{ST} V_{1a}$  Under EEFs in DCM.** Energy given in KJ/mol.

| Field   | $\Delta E, X\text{-EEF}$ | $\Delta E, Y\text{-EEF}$ | $\Delta E, Z\text{-EEF}$ |
|---------|--------------------------|--------------------------|--------------------------|
| -0.0030 | -287.053253              | -293.877075              | -296.189744              |
| -0.0025 | -288.528845              | -294.235826              | -296.160556              |
| -0.0020 | -290.007009              | -294.588945              | -296.126603              |
| -0.0015 | -291.487697              | -294.936406              | -296.087958              |
| -0.0010 | -292.970860              | -295.278160              | -296.044667              |
| -0.0005 | -294.456433              | -295.614163              | -295.996785              |
| +0.0000 | -295.944351              | -295.944351              | -295.944351              |
| +0.0005 | -297.434549              | -296.268664              | -295.887407              |
| +0.0010 | -298.926938              | -296.587011              | -295.825973              |
| +0.0015 | -300.421433              | -296.899314              | -295.760070              |
| +0.0020 | -301.917939              | -297.205468              | -295.689725              |
| +0.0025 | -303.416349              | -297.505361              | -295.614938              |
| +0.0030 | -304.916541              | -297.798868              | -295.535716              |

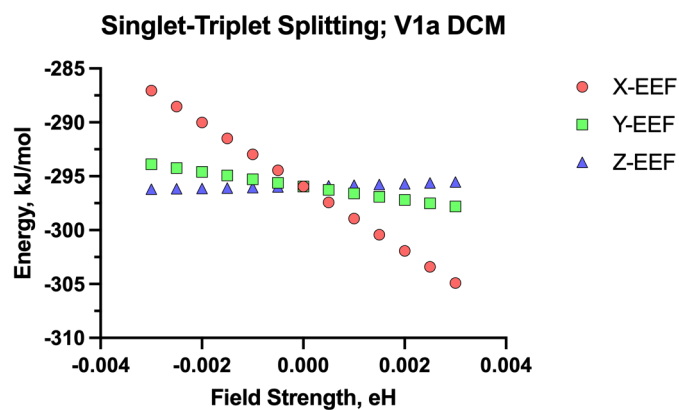

**Figure S115.  $V_{1a}$  Singlet Triplet Splitting under EEFs in DCM.** Axis definitions given in S2.

**Table S114.  $\Delta E_{ST} V_{1a}$  Under EEFs in MeCN.** Energy given in KJ/mol.

| Field   | $\Delta E, X\text{-EEF}$ | $\Delta E, Y\text{-EEF}$ | $\Delta E, Z\text{-EEF}$ |
|---------|--------------------------|--------------------------|--------------------------|
| -0.0030 | -288.964864              | -296.287221              | -298.689737              |
| -0.0025 | -290.538927              | -296.663489              | -298.662245              |
| -0.0020 | -292.115876              | -297.033587              | -298.629779              |
| -0.0015 | -293.695661              | -297.397474              | -298.592405              |
| -0.0010 | -295.278218              | -297.755106              | -298.550176              |
| -0.0005 | -296.863479              | -298.106424              | -298.503151              |
| +0.0000 | -298.451365              | -298.451365              | -298.451365              |
| +0.0005 | -300.041791              | -298.789850              | -298.394857              |
| +0.0010 | -301.634658              | -299.121787              | -298.333654              |
| +0.0015 | -303.229859              | -299.447076              | -298.267772              |
| +0.0020 | -304.827269              | -299.765601              | -298.197233              |
| +0.0025 | -306.426755              | -300.077232              | -298.122041              |
| +0.0030 | -308.028163              | -300.381825              | -298.042197              |

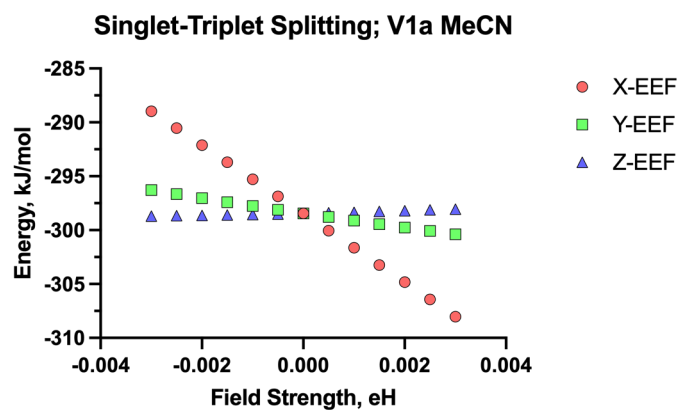

**Figure S116. V<sub>1a</sub> Singlet Triplet Splitting under EEFs in MeCN.** Axis definitions given in S2.

**Table S115.  $\Delta E_{ST} V_{1a}$  Under EEFs in Water.** Energy given in KJ/mol.

| Field   | $\Delta E, X\text{-EEF}$ | $\Delta E, Y\text{-EEF}$ | $\Delta E, Z\text{-EEF}$ |
|---------|--------------------------|--------------------------|--------------------------|
| -0.0030 | -287.333276              | -294.759931              | -297.178875              |
| -0.0025 | -288.927679              | -295.139630              | -297.151871              |
| -0.0020 | -290.525041              | -295.513037              | -297.119853              |
| -0.0015 | -292.125304              | -295.880111              | -297.082886              |
| -0.0010 | -293.728403              | -296.240810              | -297.041025              |
| -0.0005 | -295.334275              | -296.595069              | -296.994326              |
| +0.0000 | -296.942827              | -296.942827              | -296.942827              |
| +0.0005 | -298.553978              | -297.284000              | -296.886565              |
| +0.0010 | -300.167623              | -297.618494              | -296.825566              |
| +0.0015 | -301.783653              | -297.946206              | -296.759850              |
| +0.0020 | -303.401929              | -298.267016              | -296.689434              |
| +0.0025 | -305.022320              | -298.580787              | -296.614324              |
| +0.0030 | -306.644658              | -298.887372              | -296.534522              |

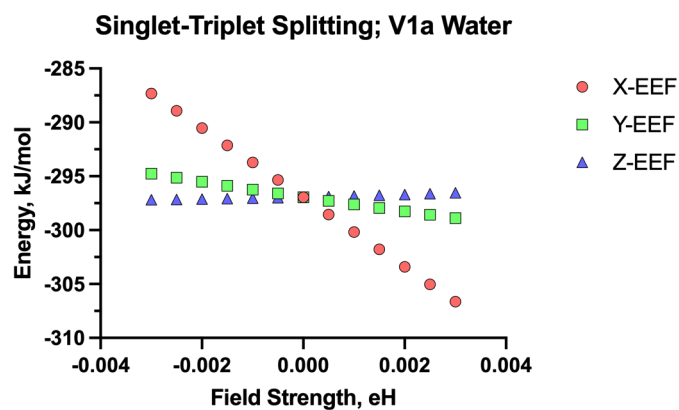

**Figure S117.  $V_{1a}$  Singlet Triplet Splitting under EEFs in Water.** Axis definitions given in S2.

**Table S116.  $\Delta E_{ST}$   $VI_{1a}$  Under EEFs in Gas.** Energy given in KJ/mol.

| Field   | $\Delta E$ , X-EEF | $\Delta E$ , Y-EEF | $\Delta E$ , Z-EEF |
|---------|--------------------|--------------------|--------------------|
| -0.0030 | -293.389806        | -298.252211        | -297.949774        |
| -0.0025 | -294.205294        | -298.285095        | -297.997419        |
| -0.0020 | -295.022494        | -298.308470        | -298.049800        |
| -0.0015 | -295.841353        | -298.322380        | -298.106957        |
| -0.0010 | -296.661827        | -298.326848        | -298.168935        |
| -0.0005 | -297.483861        | -298.321865        | -298.235743        |
| +0.0000 | -298.307409        | -298.307409        | -298.307409        |
| +0.0005 | -299.132420        | -298.283425        | -298.383921        |
| +0.0010 | -299.958849        | -298.249840        | -298.465288        |
| +0.0015 | -300.786648        | -298.206553        | -298.551481        |
| +0.0020 | -301.615762        | -298.153442        | -298.642483        |
| +0.0025 | -302.446150        | -298.090356        | -298.738251        |
| +0.0030 | -303.277762        | -298.017115        | -298.838742        |

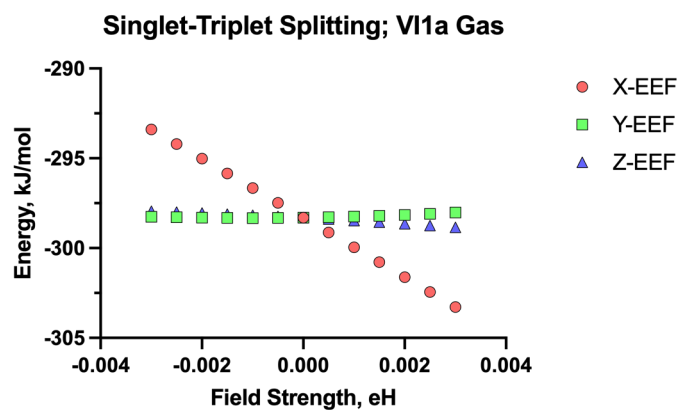

**Figure S118.  $VI_{1a}$  Singlet Triplet Splitting under EEFs in Gas.** Axis definitions given in S2.

**Table S117.  $\Delta E_{ST}$  VI<sub>1a</sub> Under EEFs in Toluene.** Energy given in KJ/mol.

| Field   | $\Delta E$ , X-EEF | $\Delta E$ , Y-EEF | $\Delta E$ , Z-EEF |
|---------|--------------------|--------------------|--------------------|
| -0.0030 | -303.015645        | -308.947636        | -308.650283        |
| -0.0025 | -304.017667        | -308.994034        | -308.702840        |
| -0.0020 | -305.021627        | -309.029024        | -308.761341        |
| -0.0015 | -306.027453        | -309.052659        | -308.825832        |
| -0.0010 | -307.035083        | -309.064957        | -308.896339        |
| -0.0005 | -308.044449        | -309.065910        | -308.972889        |
| +0.0000 | -309.055484        | -309.055484        | -309.055484        |
| +0.0005 | -310.068116        | -309.033606        | -309.144121        |
| +0.0010 | -311.082286        | -309.000191        | -309.238791        |
| +0.0015 | -312.097919        | -308.955106        | -309.339474        |
| +0.0020 | -313.114946        | -308.898201        | -309.446127        |
| +0.0025 | -314.133296        | -308.829287        | -309.558714        |
| +0.0030 | -315.152901        | -308.748133        | -309.677171        |

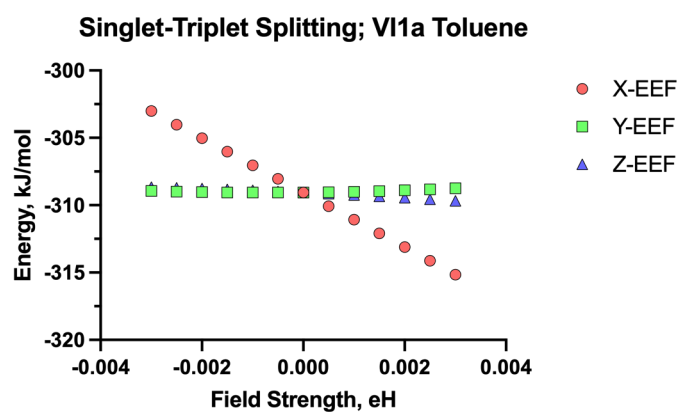

**Figure S119. VI<sub>1a</sub> Singlet Triplet Splitting under EEFs in Toluene.** Axis definitions given in S2.

**Table S118.  $\Delta E_{ST}$  VI<sub>1a</sub> Under EEFs in DCM.** Energy given in KJ/mol.

| Field   | $\Delta E$ , X-EEF | $\Delta E$ , Y-EEF | $\Delta E$ , Z-EEF |
|---------|--------------------|--------------------|--------------------|
| -0.0030 | -306.620561        | -313.736333        | -313.421431        |
| -0.0025 | -307.825805        | -313.794425        | -313.480940        |
| -0.0020 | -309.033196        | -313.838990        | -313.547342        |
| -0.0015 | -310.242646        | -313.870084        | -313.620683        |
| -0.0010 | -311.454081        | -313.887725        | -313.700986        |
| -0.0005 | -312.667400        | -313.891889        | -313.788266        |
| +0.0000 | -313.882518        | -313.882518        | -313.882518        |
| +0.0005 | -315.099351        | -313.859524        | -313.983745        |
| +0.0010 | -316.317798        | -313.822773        | -314.091918        |
| +0.0015 | -317.537774        | -313.772092        | -314.207012        |
| +0.0020 | -318.759175        | -313.707272        | -314.328985        |
| +0.0025 | -319.981907        | -313.628060        | -314.457789        |
| +0.0030 | -321.205873        | -313.534151        | -314.593352        |

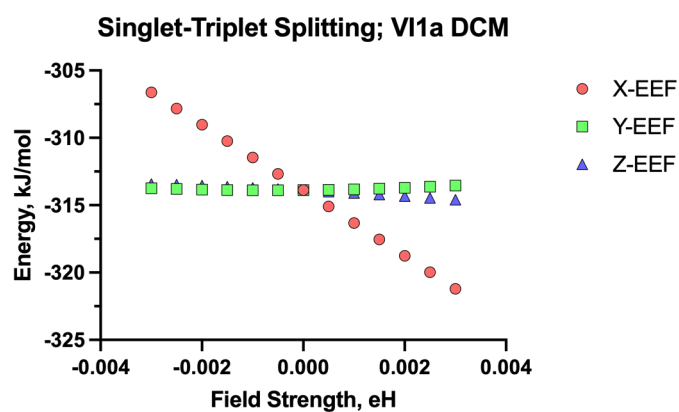

**Figure S120. VI<sub>1a</sub> Singlet Triplet Splitting under EEFs in DCM.** Axis definitions given in S2.

**Table S119.  $\Delta E_{ST}$  VI<sub>1a</sub> Under EEFs in MeCN.** Energy given in KJ/mol.

| Field   | $\Delta E$ , X-EEF | $\Delta E$ , Y-EEF | $\Delta E$ , Z-EEF |
|---------|--------------------|--------------------|--------------------|
| -0.0030 | -308.583364        | -316.197382        | -315.866963        |
| -0.0025 | -309.872981        | -316.259473        | -315.929815        |
| -0.0020 | -311.164829        | -316.307047        | -315.999866        |
| -0.0015 | -312.458815        | -316.340160        | -316.077155        |
| -0.0010 | -313.754840        | -316.358816        | -316.161707        |
| -0.0005 | -315.052809        | -316.362996        | -316.253529        |
| +0.0000 | -316.352626        | -316.352626        | -316.352626        |
| +0.0005 | -317.654186        | -316.327594        | -316.458979        |
| +0.0010 | -318.957387        | -316.287744        | -316.572577        |
| +0.0015 | -320.262124        | -316.232879        | -316.693381        |
| +0.0020 | -321.568289        | -316.162749        | -316.821351        |
| +0.0025 | -322.875775        | -316.077064        | -316.956430        |
| +0.0030 | -324.184458        | -315.975472        | -317.098556        |

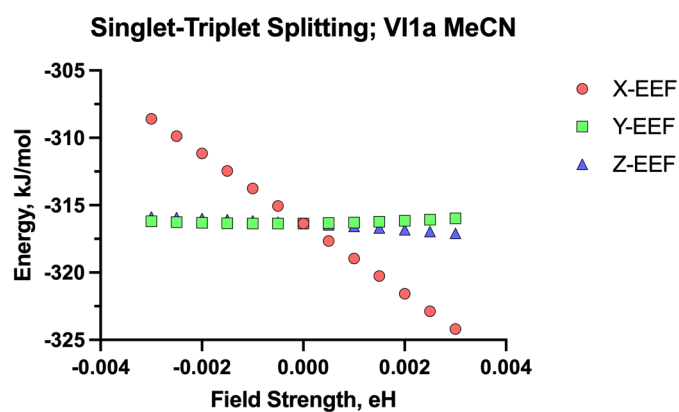

**Figure S121. VI<sub>1a</sub> Singlet Triplet Splitting under EEFs in MeCN.** Axis definitions given in S2.

**Table S120.  $\Delta E_{ST}$   $VI_{1a}$  Under EEFs in Water.** Energy given in KJ/mol.

| Field   | $\Delta E$ , X-EEF | $\Delta E$ , Y-EEF | $\Delta E$ , Z-EEF |
|---------|--------------------|--------------------|--------------------|
| -0.0030 | -293.898798        | -301.616584        | -301.282258        |
| -0.0025 | -295.205893        | -301.679446        | -301.345840        |
| -0.0020 | -296.515235        | -301.727569        | -301.416679        |
| -0.0015 | -297.826730        | -301.761010        | -301.494811        |
| -0.0010 | -299.140278        | -301.779777        | -301.580260        |
| -0.0005 | -300.455782        | -301.783847        | -301.673035        |
| +0.0000 | -301.773140        | -301.773140        | -301.773140        |
| +0.0005 | -303.092246        | -301.747539        | -301.880557        |
| +0.0010 | -304.412999        | -301.706886        | -301.995268        |
| +0.0015 | -305.735287        | -301.650976        | -302.117241        |
| +0.0020 | -307.059007        | -301.579551        | -302.246431        |
| +0.0025 | -308.384036        | -301.492306        | -302.382786        |
| +0.0030 | -309.710258        | -301.388880        | -302.526238        |

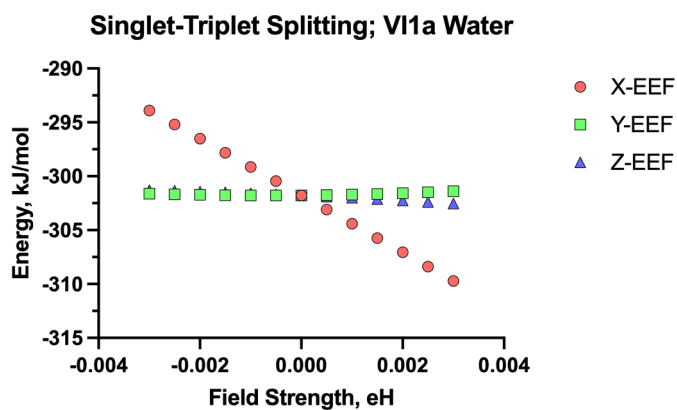

**Figure S122.  $VI_{1a}$  Singlet Triplet Splitting under EEFs in Water.** Axis definitions given in S2.



**Table S121.  $\Delta E_{ST}$  VII<sub>1a</sub> Under EEFs in Gas.** Energy given in KJ/mol.

| Field   | $\Delta E$ , X-EEF | $\Delta E$ , Y-EEF | $\Delta E$ , Z-EEF |
|---------|--------------------|--------------------|--------------------|
| -0.0030 | -248.753462        | -253.118114        | -256.156921        |
| -0.0025 | -249.986174        | -253.645202        | -256.151748        |
| -0.0020 | -251.218213        | -254.163189        | -256.147450        |
| -0.0015 | -252.449575        | -254.671849        | -256.144048        |
| -0.0010 | -253.680247        | -255.170946        | -256.141564        |
| -0.0005 | -254.910205        | -255.660223        | -256.140012        |
| +0.0000 | -256.139398        | -256.139398        | -256.139398        |
| +0.0005 | -257.367785        | -256.608184        | -256.139731        |
| +0.0010 | -258.595291        | -257.066249        | -256.140997        |
| +0.0015 | -259.821848        | -257.513246        | -256.143197        |
| +0.0020 | -261.047363        | -257.948801        | -256.146314        |
| +0.0025 | -262.271734        | -258.372501        | -256.150325        |
| +0.0030 | -263.494849        | -258.783901        | -256.155211        |

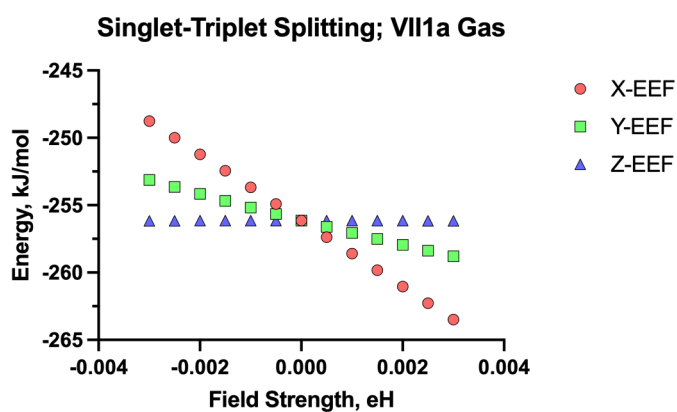

**Figure S123. VII<sub>1a</sub> Singlet Triplet Splitting under EEFs in Gas.** Axis definitions given in S2.

**Table S122.  $\Delta E_{ST}$  VII<sub>1a</sub> Under EEFs in Toluene.** Energy given in KJ/mol.

| Field   | $\Delta E$ , X-EEF | $\Delta E$ , Y-EEF | $\Delta E$ , Z-EEF |
|---------|--------------------|--------------------|--------------------|
| -0.0030 | -257.558833        | -262.711728        | -266.665660        |
| -0.0025 | -259.074641        | -263.394534        | -266.657306        |
| -0.0020 | -260.589408        | -264.066305        | -266.650385        |
| -0.0015 | -262.103122        | -264.726792        | -266.644932        |
| -0.0010 | -263.615753        | -265.375710        | -266.640973        |
| -0.0005 | -265.127267        | -266.012754        | -266.638526        |
| +0.0000 | -266.637599        | -266.637599        | -266.637599        |
| +0.0005 | -268.146681        | -267.249894        | -266.638203        |
| +0.0010 | -269.654427        | -267.849254        | -266.640327        |
| +0.0015 | -271.160732        | -268.435263        | -266.643963        |
| +0.0020 | -272.665477        | -269.007465        | -266.649091        |
| +0.0025 | -274.168531        | -269.565378        | -266.655691        |
| +0.0030 | -275.669744        | -270.108463        | -266.663717        |

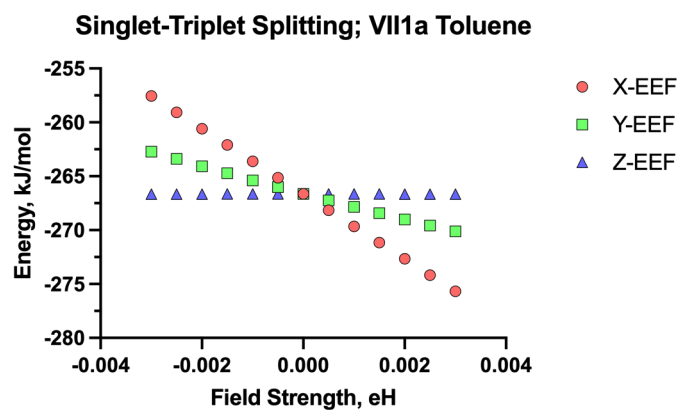

**Figure S124. VII<sub>1a</sub> Singlet Triplet Splitting under EEFs in Toluene.** Axis definitions given in S2.

**Table S123.  $\Delta E_{ST}$  VII<sub>1a</sub> Under EEFs in DCM.** Energy given in KJ/mol.

| Field   | $\Delta E$ , X-EEF | $\Delta E$ , Y-EEF | $\Delta E$ , Z-EEF |
|---------|--------------------|--------------------|--------------------|
| -0.0030 | -260.875262        | -266.825509        | -271.893133        |
| -0.0025 | -262.710904        | -267.698023        | -271.881392        |
| -0.0020 | -264.544227        | -268.557191        | -271.871678        |
| -0.0015 | -266.375227        | -269.402707        | -271.864037        |
| -0.0010 | -268.203870        | -270.234237        | -271.858505        |
| -0.0005 | -270.030105        | -271.051416        | -271.855105        |
| +0.0000 | -271.853850        | -271.853850        | -271.853850        |
| +0.0005 | -273.675018        | -272.641109        | -271.854746        |
| +0.0010 | -275.493492        | -273.412723        | -271.857789        |
| +0.0015 | -277.309133        | -274.168179        | -271.862961        |
| +0.0020 | -279.121791        | -274.906924        | -271.870241        |
| +0.0025 | -280.931286        | -275.628356        | -271.879599        |
| +0.0030 | -282.737417        | -276.331814        | -271.890983        |

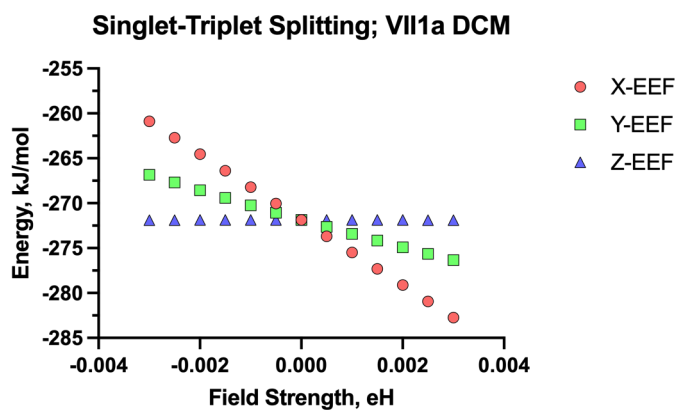

**Figure S125. VII<sub>1a</sub> Singlet Triplet Splitting under EEFs in DCM.** Axis definitions given in S2.

**Table S124.  $\Delta E_{ST}$  VII<sub>1a</sub> Under EEFs in MeCN.** Energy given in KJ/mol.

| Field   | $\Delta E$ , X-EEF | $\Delta E$ , Y-EEF | $\Delta E$ , Z-EEF |
|---------|--------------------|--------------------|--------------------|
| -0.0030 | -262.639144        | -268.904692        | -274.484840        |
| -0.0025 | -264.614231        | -269.864795        | -274.471647        |
| -0.0020 | -266.586095        | -270.810401        | -274.460736        |
| -0.0015 | -268.554721        | -271.741177        | -274.452158        |
| -0.0010 | -270.520083        | -272.656765        | -274.445949        |
| -0.0005 | -272.482117        | -273.556766        | -274.442142        |
| +0.0000 | -274.440745        | -274.440745        | -274.440745        |
| +0.0005 | -276.395860        | -275.308229        | -274.441766        |
| +0.0010 | -278.347334        | -276.158704        | -274.445203        |
| +0.0015 | -280.295017        | -276.991602        | -274.451037        |
| +0.0020 | -282.238730        | -277.806318        | -274.459244        |
| +0.0025 | -284.178273        | -278.602173        | -274.469781        |
| +0.0030 | -286.113419        | -279.378449        | -274.482601        |

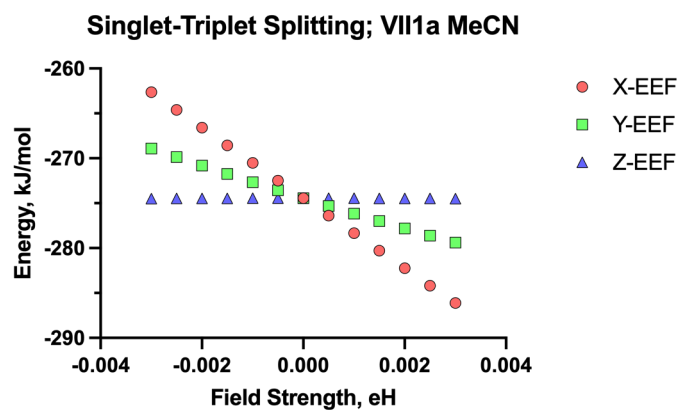

**Figure S126. VII<sub>1a</sub> Singlet Triplet Splitting under EEFs in MeCN.** Axis definitions given in S2.

**Table S125.  $\Delta E_{ST}$  VII<sub>1a</sub> Under EEFs in Water.** Energy given in KJ/mol.

| Field   | $\Delta E$ , X-EEF | $\Delta E$ , Y-EEF | $\Delta E$ , Z-EEF |
|---------|--------------------|--------------------|--------------------|
| -0.0030 | -250.065653        | -256.395264        | -262.086255        |
| -0.0025 | -252.070290        | -257.374347        | -262.072750        |
| -0.0020 | -254.071470        | -258.338669        | -262.061586        |
| -0.0015 | -256.069192        | -259.287898        | -262.052809        |
| -0.0010 | -258.063420        | -260.221659        | -262.046461        |
| -0.0005 | -260.054097        | -261.139555        | -262.042562        |
| +0.0000 | -262.041136        | -262.041136        | -262.041136        |
| +0.0005 | -264.024434        | -262.925927        | -262.042186        |
| +0.0010 | -266.003858        | -263.793395        | -262.045710        |
| +0.0015 | -267.979253        | -264.642962        | -262.051683        |
| +0.0020 | -269.950434        | -265.474004        | -262.060084        |
| +0.0025 | -271.917199        | -266.285837        | -262.070873        |
| +0.0030 | -273.879311        | -267.077719        | -262.084000        |

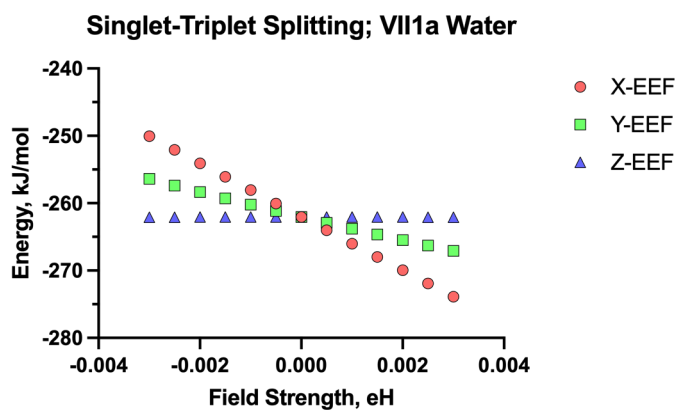

**Figure S127. VII<sub>1a</sub> Singlet Triplet Splitting under EEFs in Water.** Axis definitions given in S2.

**Table S126.  $\Delta E_{ST}$  VIII<sub>1a</sub> Under EEFs in Gas.** Energy given in KJ/mol.

| Field   | $\Delta E$ , X-EEF | $\Delta E$ , Y-EEF | $\Delta E$ , Z-EEF |
|---------|--------------------|--------------------|--------------------|
| -0.0030 | -189.783669        | -194.786234        | -195.983338        |
| -0.0025 | -190.840026        | -195.016364        | -196.012006        |
| -0.0020 | -191.896640        | -195.243793        | -196.038749        |
| -0.0015 | -192.953519        | -195.468499        | -196.063545        |
| -0.0010 | -194.010690        | -195.690461        | -196.086371        |
| -0.0005 | -195.068168        | -195.909633        | -196.107194        |
| +0.0000 | -196.125974        | -196.125974        | -196.125974        |
| +0.0005 | -197.184129        | -196.339424        | -196.142675        |
| +0.0010 | -198.242654        | -196.549918        | -196.157243        |
| +0.0015 | -199.301579        | -196.757383        | -196.169631        |
| +0.0020 | -200.360918        | -196.961731        | -196.179778        |
| +0.0025 | -201.420704        | -197.162870        | -196.187607        |
| +0.0030 | -202.480957        | -197.360686        | -196.193055        |

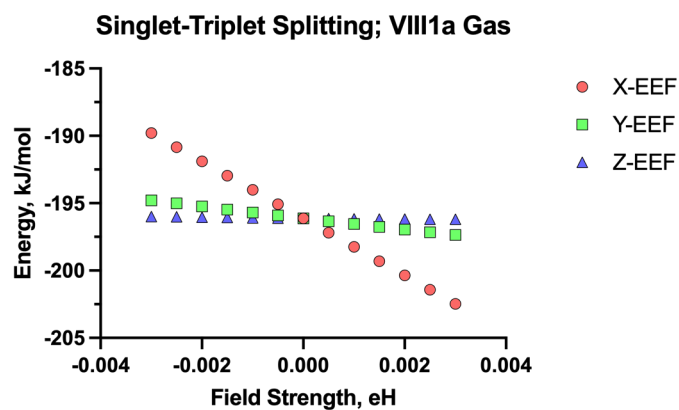

**Figure S128. VIII<sub>1a</sub> Singlet Triplet Splitting under EEFs in Gas.** Axis definitions given in S2.

**Table S127.  $\Delta E_{ST}$  VIII<sub>1a</sub> Under EEFs in Toluene.** Energy given in KJ/mol.

| Field   | $\Delta E$ , X-EEF | $\Delta E$ , Y-EEF | $\Delta E$ , Z-EEF |
|---------|--------------------|--------------------|--------------------|
| -0.0030 | -198.120422        | -204.335424        | -205.670467        |
| -0.0025 | -199.421168        | -204.609198        | -205.718779        |
| -0.0020 | -200.722037        | -204.879653        | -205.764953        |
| -0.0015 | -202.023075        | -205.146764        | -205.808965        |
| -0.0010 | -203.324328        | -205.410503        | -205.850778        |
| -0.0005 | -204.625844        | -205.670821        | -205.890363        |
| +0.0000 | -205.927664        | -205.927664        | -205.927664        |
| +0.0005 | -207.229838        | -206.180964        | -205.962633        |
| +0.0010 | -208.532414        | -206.430641        | -205.995210        |
| +0.0015 | -209.835437        | -206.676606        | -206.025330        |
| +0.0020 | -211.138956        | -206.918745        | -206.052913        |
| +0.0025 | -212.443015        | -207.156941        | -206.077876        |
| +0.0030 | -213.747663        | -207.391062        | -206.100122        |

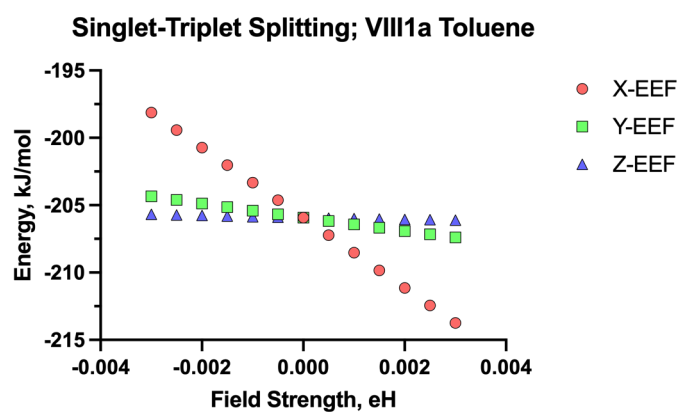

**Figure S129. VIII<sub>1a</sub> Singlet Triplet Splitting under EEFs in Toluene.** Axis definitions given in S2.

**Table S128.  $\Delta E_{ST}$  VIII<sub>1a</sub> Under EEFs in DCM.** Energy given in KJ/mol.

| Field   | $\Delta E$ , X-EEF | $\Delta E$ , Y-EEF | $\Delta E$ , Z-EEF |
|---------|--------------------|--------------------|--------------------|
| -0.0030 | -205.039536        | -212.667411        | -214.111738        |
| -0.0025 | -206.619346        | -212.986759        | -214.185588        |
| -0.0020 | -208.199186        | -213.301976        | -214.257215        |
| -0.0015 | -209.779149        | -213.613032        | -214.326586        |
| -0.0010 | -211.359337        | -213.919890        | -214.393664        |
| -0.0005 | -212.939841        | -214.222490        | -214.458409        |
| +0.0000 | -214.520760        | -214.520760        | -214.520760        |
| +0.0005 | -216.102190        | -214.814616        | -214.580663        |
| +0.0010 | -217.684217        | -215.103952        | -214.638036        |
| +0.0015 | -219.266936        | -215.388637        | -214.692809        |
| +0.0020 | -220.850436        | -215.668544        | -214.744885        |
| +0.0025 | -222.434807        | -215.943505        | -214.794171        |
| +0.0030 | -224.020139        | -216.213343        | -214.840543        |

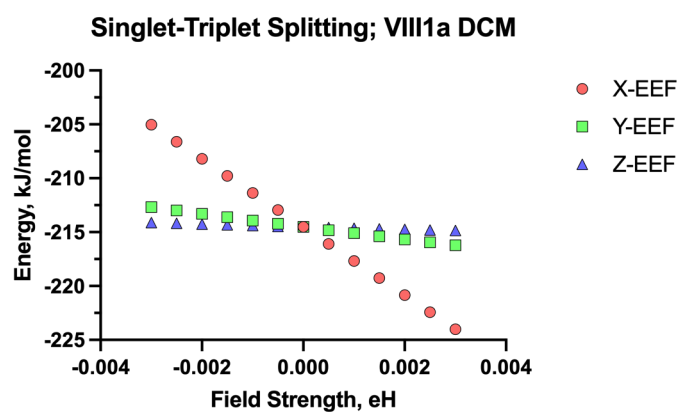

**Figure S130. VIII<sub>1a</sub> Singlet Triplet Splitting under EEFs in DCM.** Axis definitions given in S2.



**Table S129.  $\Delta E_{ST}$  VIII<sub>1a</sub> Under EEFs in MeCN.** Energy given in KJ/mol.

| Field   | $\Delta E$ , X-EEF | $\Delta E$ , Y-EEF | $\Delta E$ , Z-EEF |
|---------|--------------------|--------------------|--------------------|
| -0.0030 | -207.684779        | -215.932270        | -217.416319        |
| -0.0025 | -209.386001        | -216.270949        | -217.501758        |
| -0.0020 | -211.087236        | -216.605057        | -217.584981        |
| -0.0015 | -212.788620        | -216.934563        | -217.665951        |
| -0.0010 | -214.490280        | -217.259419        | -217.744627        |
| -0.0005 | -216.192337        | -217.579564        | -217.820969        |
| +0.0000 | -217.894913        | -217.894913        | -217.894913        |
| +0.0005 | -219.598138        | -218.205365        | -217.966398        |
| +0.0010 | -221.302122        | -218.510806        | -218.035341        |
| +0.0015 | -223.006987        | -218.811084        | -218.101669        |
| +0.0020 | -224.712851        | -219.106043        | -218.165274        |
| +0.0025 | -226.419822        | -219.395502        | -218.226060        |
| +0.0030 | -228.128020        | -219.679250        | -218.283899        |

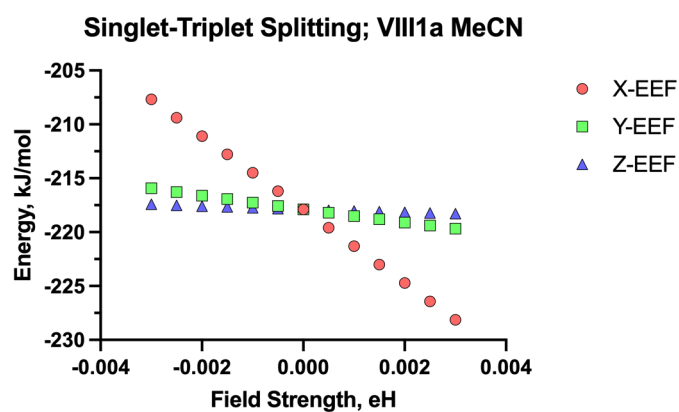

**Figure S131. VIII<sub>1a</sub> Singlet Triplet Splitting under EEFs in MeCN.** Axis definitions given in S2.

**Table S130.  $\Delta E_{ST}$  VIII<sub>1a</sub> Under EEFs in Water.** Energy given in KJ/mol.

| Field   | $\Delta E$ , X-EEF | $\Delta E$ , Y-EEF | $\Delta E$ , Z-EEF |
|---------|--------------------|--------------------|--------------------|
| -0.0030 | -206.558387        | -214.936873        | -216.429086        |
| -0.0025 | -208.285242        | -215.279642        | -216.516985        |
| -0.0020 | -210.012117        | -215.617736        | -216.602671        |
| -0.0015 | -211.739147        | -215.951124        | -216.686107        |
| -0.0010 | -213.466464        | -216.279763        | -216.767258        |
| -0.0005 | -215.194203        | -216.603582        | -216.846073        |
| +0.0000 | -216.922494        | -216.922494        | -216.922494        |
| +0.0005 | -218.651461        | -217.236396        | -216.996454        |
| +0.0010 | -220.381238        | -217.545168        | -217.067878        |
| +0.0015 | -222.111939        | -217.848662        | -217.136682        |
| +0.0020 | -223.843692        | -218.146712        | -217.202766        |
| +0.0025 | -225.576614        | -218.439129        | -217.266027        |
| +0.0030 | -227.310825        | -218.725697        | -217.326337        |

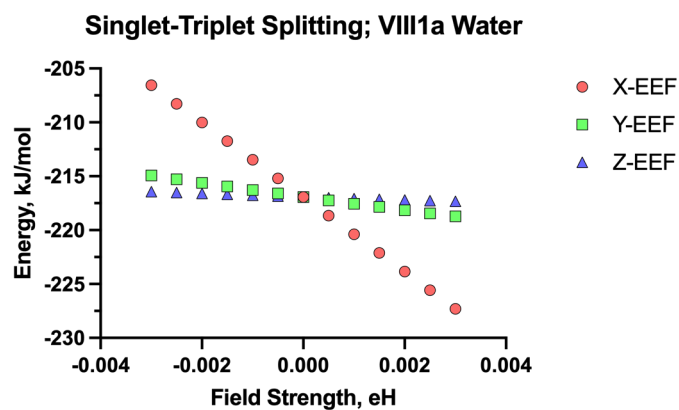

**Figure S132. VIII<sub>1a</sub> Singlet Triplet Splitting under EEFs in Water.** Axis definitions given in S2.

**Table S131.  $\Delta E_{ST}$  IX<sub>1a</sub> Under EEFs in Gas.** Energy given in KJ/mol.

| Field   | $\Delta E$ , X-EEF | $\Delta E$ , Y-EEF | $\Delta E$ , Z-EEF |
|---------|--------------------|--------------------|--------------------|
| -0.0030 | -360.034815        | -366.546055        | -363.684260        |
| -0.0025 | -360.927485        | -366.362270        | -363.973065        |
| -0.0020 | -361.846410        | -366.178485        | -364.261870        |
| -0.0015 | -362.739080        | -365.994700        | -364.550675        |
| -0.0010 | -363.631750        | -365.810915        | -364.839480        |
| -0.0005 | -364.498165        | -365.600875        | -365.128285        |
| +0.0000 | -365.390835        | -365.390835        | -365.390835        |
| +0.0005 | -366.283505        | -365.180795        | -365.679640        |
| +0.0010 | -367.176175        | -364.970755        | -365.968445        |
| +0.0015 | -368.068845        | -364.734460        | -366.204740        |
| +0.0020 | -368.935260        | -364.498165        | -366.493545        |
| +0.0025 | -369.827930        | -364.261870        | -366.729840        |
| +0.0030 | -370.720600        | -364.025575        | -366.992390        |

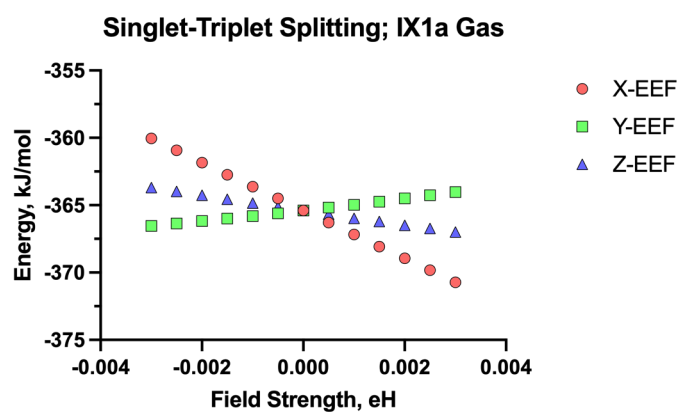

**Figure S133. IX<sub>1a</sub> Singlet Triplet Splitting under EEFs in Gas.** Axis definitions given in S2.

**Table S132.  $\Delta E_{ST}$  IX<sub>1a</sub> Under EEFs in Toluene.** Energy given in KJ/mol.

| Field   | $\Delta E$ , X-EEF | $\Delta E$ , Y-EEF | $\Delta E$ , Z-EEF |
|---------|--------------------|--------------------|--------------------|
| -0.0030 | -367.644002        | -375.594736        | -372.119873        |
| -0.0025 | -368.747227        | -375.392068        | -372.483426        |
| -0.0020 | -369.848687        | -375.179240        | -372.842498        |
| -0.0015 | -370.948262        | -374.956692        | -373.197124        |
| -0.0010 | -372.045842        | -374.724813        | -373.547331        |
| -0.0005 | -373.141303        | -374.483976        | -373.893128        |
| +0.0000 | -374.234506        | -374.234506        | -374.234506        |
| +0.0005 | -375.325312        | -373.976706        | -374.571450        |
| +0.0010 | -376.413579        | -373.710850        | -374.903933        |
| +0.0015 | -377.499142        | -373.437202        | -375.231907        |
| +0.0020 | -378.581830        | -373.155993        | -375.555324        |
| +0.0025 | -379.661470        | -372.867437        | -375.874110        |
| +0.0030 | -380.737862        | -372.571738        | -376.188185        |

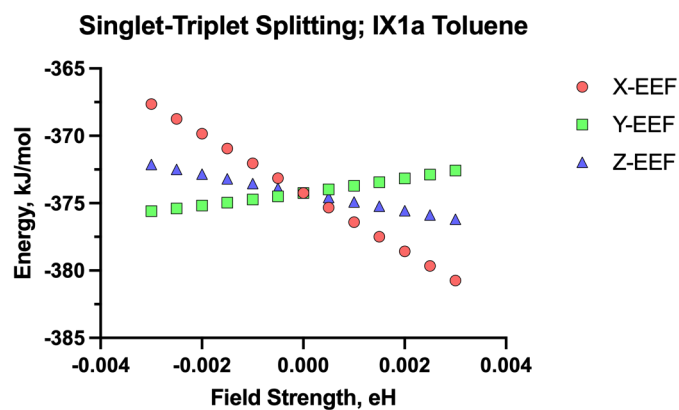

**Figure S134. IX<sub>1a</sub> Singlet Triplet Splitting under EEFs in Toluene.** Axis definitions given in S2.

**Table S133.  $\Delta E_{ST}$  IX<sub>1a</sub> Under EEFs in DCM.** Energy given in KJ/mol.

| Field   | $\Delta E$ , X-EEF | $\Delta E$ , Y-EEF | $\Delta E$ , Z-EEF |
|---------|--------------------|--------------------|--------------------|
| -0.0030 | -370.401531        | -379.896654        | -375.872401        |
| -0.0025 | -371.728587        | -379.666049        | -376.294479        |
| -0.0020 | -373.053577        | -379.422486        | -376.711492        |
| -0.0015 | -374.376346        | -379.166558        | -377.123496        |
| -0.0010 | -375.696736        | -378.898796        | -377.530517        |
| -0.0005 | -377.014572        | -378.619685        | -377.932573        |
| +0.0000 | -378.329664        | -378.329664        | -378.329664        |
| +0.0005 | -379.641805        | -378.029133        | -378.721774        |
| +0.0010 | -380.950782        | -377.718466        | -379.108878        |
| +0.0015 | -382.256354        | -377.397992        | -379.490938        |
| +0.0020 | -383.558266        | -377.068025        | -379.867900        |
| +0.0025 | -384.856245        | -376.728847        | -380.239694        |
| +0.0030 | -386.149989        | -376.380713        | -380.606240        |

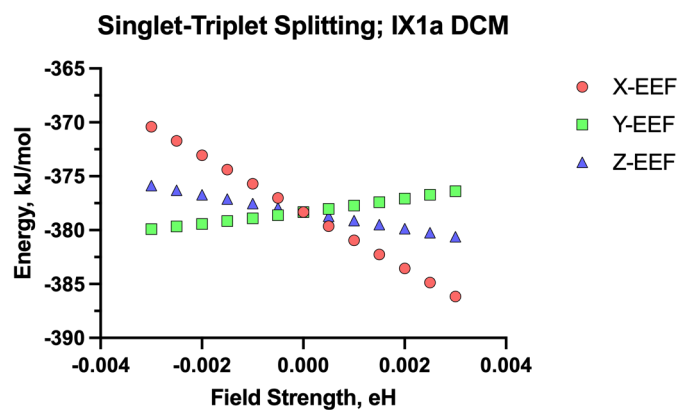

**Figure S135. IX<sub>1a</sub> Singlet Triplet Splitting under EEFs in DCM.** Axis definitions given in S2.

**Table S134.  $\Delta E_{ST}$  IX<sub>1a</sub> Under EEFs in MeCN.** Energy given in KJ/mol.

| Field   | $\Delta E$ , X-EEF | $\Delta E$ , Y-EEF | $\Delta E$ , Z-EEF |
|---------|--------------------|--------------------|--------------------|
| -0.0030 | -371.435203        | -381.560893        | -377.336078        |
| -0.0025 | -372.855410        | -381.321434        | -377.779756        |
| -0.0020 | -374.273413        | -381.067509        | -378.218159        |
| -0.0015 | -375.689052        | -380.799797        | -378.651340        |
| -0.0010 | -377.102127        | -380.518916        | -379.079333        |
| -0.0005 | -378.512454        | -380.225417        | -379.502154        |
| +0.0000 | -379.919809        | -379.919809        | -379.919809        |
| +0.0005 | -381.323957        | -379.602556        | -380.332288        |
| +0.0010 | -382.724641        | -379.274072        | -380.739558        |
| +0.0015 | -384.121580        | -378.934747        | -381.141588        |
| +0.0020 | -385.514479        | -378.584933        | -381.538322        |
| +0.0025 | -386.903006        | -378.224949        | -381.929692        |
| +0.0030 | -388.286804        | -377.855086        | -382.315622        |

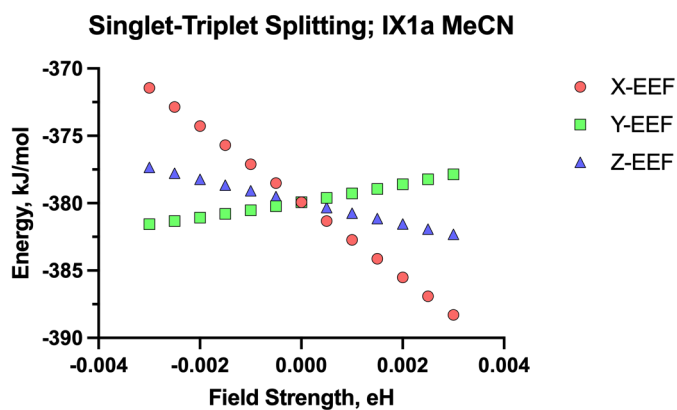

**Figure S136. IX<sub>1a</sub> Singlet Triplet Splitting under EEFs in MeCN.** Axis definitions given in S2.

**Table S135.  $\Delta E_{ST}$  IX<sub>1a</sub> Under EEFs in Water.** Energy given in KJ/mol.

| Field   | $\Delta E$ , X-EEF | $\Delta E$ , Y-EEF | $\Delta E$ , Z-EEF |
|---------|--------------------|--------------------|--------------------|
| -0.0030 | -365.331428        | -375.586935        | -371.322409        |
| -0.0025 | -366.770945        | -375.345862        | -371.770398        |
| -0.0020 | -368.208235        | -375.089981        | -372.213073        |
| -0.0015 | -369.643118        | -374.819987        | -372.650479        |
| -0.0010 | -371.075413        | -374.536517        | -373.082657        |
| -0.0005 | -372.504908        | -374.240143        | -373.509627        |
| +0.0000 | -373.931384        | -373.931384        | -373.931384        |
| +0.0005 | -375.354600        | -373.610724        | -374.347928        |
| +0.0010 | -376.774284        | -373.278588        | -374.759225        |
| +0.0015 | -378.190153        | -372.935375        | -375.165241        |
| +0.0020 | -379.601897        | -372.581447        | -375.565918        |
| +0.0025 | -381.009170        | -372.217135        | -375.961198        |
| +0.0030 | -382.411605        | -371.842741        | -376.350995        |

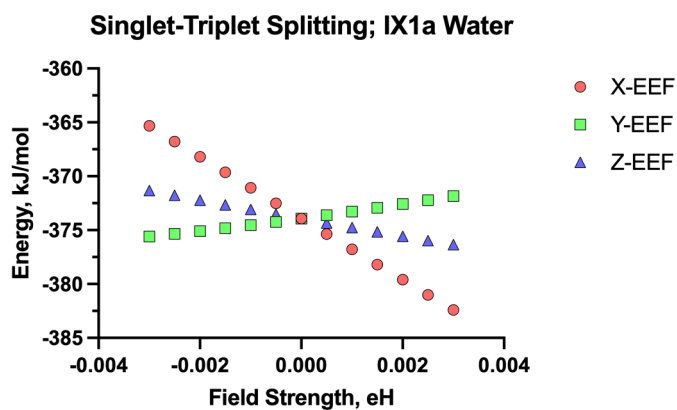

**Figure S137. IX<sub>1a</sub> Singlet Triplet Splitting under EEFs in Water.** Axis definitions given in S2.

## S5. Benchmark: Effect of Geometry Optimisation versus Single-Points of $I_{1a}$ under EEFs

Energy of structure optimised under electric field, measured relative to energy of structure optimised without external electric field. In the worst case, the maximum change relative to the optimisation without external field is only 5 kJ/mol in the triplet state, and 0.63 kJ/mol in the singlet state.

**Table S136. Change in Energy of  $I_{1a}$  due to Optimisation under EEFs in Gas.** Energy given in Hartree, changes in energy given in KJ/mol.

| Field   | E, X-EEF    | E, Y-EEF    | E, Z-EEF    | $\Delta E$ , X-EEF | $\Delta E$ , Y-EEF | $\Delta E$ , Z-EEF |
|---------|-------------|-------------|-------------|--------------------|--------------------|--------------------|
| -0.0030 | -304.774663 | -304.777589 | -304.777699 | -0.033339          | -0.233446          | -0.050215          |
| -0.0025 | -304.775044 | -304.777485 | -304.777561 | -0.009339          | -0.170104          | -0.029652          |
| -0.0020 | -304.775444 | -304.777400 | -304.777449 | -0.011657          | -0.103833          | -0.022422          |
| -0.0015 | -304.775865 | -304.777333 | -304.777361 | -0.014015          | -0.061271          | -0.002240          |
| -0.0010 | -304.776306 | -304.777284 | -304.777298 | 0.010064           | -0.011613          | 0.005427           |
| -0.0005 | -304.776767 | -304.777257 | -304.777261 | 0.008320           | -0.018914          | -0.001392          |
| +0.0000 | -304.777248 | -304.777248 | -304.777248 | 0.005658           | 0.005658           | 0.005658           |
| +0.0005 | -304.777749 | -304.777257 | -304.777261 | 0.002731           | -0.018791          | -0.001405          |
| +0.0010 | -304.778270 | -304.777284 | -304.777298 | -0.000289          | -0.011366          | 0.005395           |
| +0.0015 | -304.778811 | -304.777333 | -304.777361 | -0.002980          | -0.060360          | -0.002316          |
| +0.0020 | -304.779372 | -304.777399 | -304.777449 | -0.005766          | -0.102607          | -0.022522          |
| +0.0025 | -304.779953 | -304.777484 | -304.777561 | -0.008680          | -0.168554          | -0.029778          |
| +0.0030 | -304.780554 | -304.777588 | -304.777699 | -0.038015          | -0.231590          | -0.050368          |

**Table S137. Change in Energy of  $^3I_{1a}$  due to Optimisation under EEFs in Gas.** Energy given in Hartree, changes in energy given in KJ/mol.

| Field   | E, X-EEF    | E, Y-EEF    | E, Z-EEF    | $\Delta E$ , X-EEF | $\Delta E$ , Y-EEF | $\Delta E$ , Z-EEF |
|---------|-------------|-------------|-------------|--------------------|--------------------|--------------------|
| -0.0030 | -304.639710 | -304.641438 | -304.641446 | -0.236765          | -2.280241          | -2.115896          |
| -0.0025 | -304.639780 | -304.641192 | -304.641167 | -0.209867          | -1.816402          | -1.645852          |
| -0.0020 | -304.639867 | -304.640972 | -304.640928 | -0.176951          | -1.395697          | -1.229010          |
| -0.0015 | -304.639969 | -304.640780 | -304.640731 | -0.103148          | -0.971380          | -0.841785          |
| -0.0010 | -304.640093 | -304.640619 | -304.640576 | -0.061156          | -0.600875          | -0.487471          |
| -0.0005 | -304.640252 | -304.640492 | -304.640466 | -0.056912          | -0.266633          | -0.225601          |
| +0.0000 | -304.640410 | -304.640410 | -304.640410 | -0.000158          | -0.000158          | -0.000158          |
| +0.0005 | -304.640604 | -304.640453 | -304.640464 | -0.010872          | -0.033843          | -0.035927          |
| +0.0010 | -304.640821 | -304.640542 | -304.640571 | -0.001856          | -0.135282          | -0.133360          |
| +0.0015 | -304.641059 | -304.640664 | -304.640723 | 0.002400           | -0.247451          | -0.270581          |
| +0.0020 | -304.641316 | -304.640818 | -304.640918 | -0.015068          | -0.440102          | -0.467171          |
| +0.0025 | -304.641592 | -304.641000 | -304.641154 | -0.032708          | -0.629797          | -0.693040          |
| +0.0030 | -304.641889 | -304.641210 | -304.641430 | -0.023737          | -0.839892          | -0.972435          |



**Table S138. Change in Energy of  $^3I_{1a}$  due to Optimisation under EEFs in Toluene.** Energy given in Hartree, changes in energy given in KJ/mol.

| Field   | E, X-EEF    | E, Y-EEF    | E, Z-EEF    | $\Delta E$ , X-EEF | $\Delta E$ , Y-EEF | $\Delta E$ , Z-EEF |
|---------|-------------|-------------|-------------|--------------------|--------------------|--------------------|
| -0.0030 | -304.790591 | -304.794242 | -304.794347 | -0.223721          | -0.614609          | -0.343867          |
| -0.0025 | -304.791070 | -304.794114 | -304.794186 | -0.226641          | -0.508625          | -0.318660          |
| -0.0020 | -304.791573 | -304.794010 | -304.794056 | -0.231430          | -0.422674          | -0.300596          |
| -0.0015 | -304.792100 | -304.793928 | -304.793954 | -0.238051          | -0.356146          | -0.286565          |
| -0.0010 | -304.792650 | -304.793871 | -304.793881 | -0.246471          | -0.309019          | -0.276560          |
| -0.0005 | -304.793225 | -304.793836 | -304.793838 | -0.256664          | -0.279692          | -0.270568          |
| +0.0000 | -304.793823 | -304.793823 | -304.793823 | -0.268594          | -0.268594          | -0.268594          |
| +0.0005 | -304.794446 | -304.793835 | -304.793838 | -0.282236          | -0.279490          | -0.270626          |
| +0.0010 | -304.795092 | -304.793870 | -304.793881 | -0.297572          | -0.308268          | -0.276673          |
| +0.0015 | -304.795762 | -304.793928 | -304.793954 | -0.314582          | -0.355028          | -0.286739          |
| +0.0020 | -304.796457 | -304.794009 | -304.794056 | -0.336739          | -0.421170          | -0.300825          |
| +0.0025 | -304.797175 | -304.794113 | -304.794186 | -0.357396          | -0.506764          | -0.318948          |
| +0.0030 | -304.797917 | -304.794241 | -304.794347 | -0.379739          | -0.612369          | -0.344221          |

**Table S139. Change in Energy of  $^3I_{1a}$  due to Optimisation under EEFs in Toluene.** Energy given in Hartree, changes in energy given in KJ/mol.

| Field   | E, X-EEF    | E, Y-EEF    | E, Z-EEF    | $\Delta E$ , X-EEF | $\Delta E$ , Y-EEF | $\Delta E$ , Z-EEF |
|---------|-------------|-------------|-------------|--------------------|--------------------|--------------------|
| -0.0030 | -304.651540 | -304.653993 | -304.653984 | -0.246789          | -3.629134          | -3.365421          |
| -0.0025 | -304.651643 | -304.653652 | -304.653607 | -0.230201          | -2.949224          | -2.683621          |
| -0.0020 | -304.651768 | -304.653351 | -304.653283 | -0.217651          | -2.321415          | -2.062837          |
| -0.0015 | -304.651918 | -304.653085 | -304.653009 | -0.209137          | -1.729207          | -1.501439          |
| -0.0010 | -304.652091 | -304.652855 | -304.652788 | -0.204566          | -1.175765          | -1.001500          |
| -0.0005 | -304.652288 | -304.652661 | -304.652620 | -0.204046          | -0.664291          | -0.567922          |
| +0.0000 | -304.652508 | -304.652508 | -304.652508 | -0.207454          | -0.207454          | -0.207454          |
| +0.0005 | -304.652752 | -304.652610 | -304.652613 | -0.214952          | -0.364089          | -0.339603          |
| +0.0010 | -304.653020 | -304.652757 | -304.652775 | -0.226607          | -0.583278          | -0.549727          |
| +0.0015 | -304.653312 | -304.652941 | -304.652993 | -0.242394          | -0.848433          | -0.828747          |
| +0.0020 | -304.653628 | -304.653162 | -304.653264 | -0.262461          | -1.153141          | -1.174074          |
| +0.0025 | -304.653967 | -304.653417 | -304.653588 | -0.286839          | -1.494863          | -1.585492          |
| +0.0030 | -304.654331 | -304.653708 | -304.653965 | -0.315848          | -1.871661          | -2.059062          |

**Table S140. Change in Energy of  $I_{1a}$  due to Optimisation under EEFs in DCM.** Energy given in Hartree, changes in energy given in KJ/mol.

| Field   | E, X-EEF    | E, Y-EEF    | E, Z-EEF    | $\Delta E$ , X-EEF | $\Delta E$ , Y-EEF | $\Delta E$ , Z-EEF |
|---------|-------------|-------------|-------------|--------------------|--------------------|--------------------|
| -0.0030 | -304.794822 | -304.799299 | -304.799349 | -0.558034          | -1.152240          | -0.723472          |
| -0.0025 | -304.795409 | -304.799135 | -304.799170 | -0.564863          | -0.992323          | -0.696311          |
| -0.0020 | -304.796024 | -304.799001 | -304.799024 | -0.574115          | -0.862369          | -0.674118          |
| -0.0015 | -304.796667 | -304.798898 | -304.798911 | -0.585760          | -0.762267          | -0.656884          |
| -0.0010 | -304.797339 | -304.798824 | -304.798830 | -0.599769          | -0.691604          | -0.644594          |
| -0.0005 | -304.798038 | -304.798780 | -304.798781 | -0.616126          | -0.649381          | -0.637235          |
| +0.0000 | -304.798765 | -304.798765 | -304.798765 | -0.634807          | -0.634807          | -0.634807          |
| +0.0005 | -304.799521 | -304.798779 | -304.798781 | -0.655792          | -0.646472          | -0.637303          |
| +0.0010 | -304.800304 | -304.798824 | -304.798830 | -0.679067          | -0.690685          | -0.644731          |
| +0.0015 | -304.801116 | -304.798897 | -304.798911 | -0.704616          | -0.760838          | -0.657092          |
| +0.0020 | -304.801956 | -304.799001 | -304.799025 | -0.732430          | -0.860466          | -0.674394          |
| +0.0025 | -304.802824 | -304.799134 | -304.799170 | -0.762492          | -0.989913          | -0.696655          |
| +0.0030 | -304.803721 | -304.799298 | -304.799349 | -0.794802          | -1.149431          | -0.723884          |

**Table S141. Change in Energy of  $^3I_{1a}$  due to Optimisation under EEFs in DCM.** Energy given in Hartree, changes in energy given in KJ/mol.

| Field   | E, X-EEF    | E, Y-EEF    | E, Z-EEF    | $\Delta E$ , X-EEF | $\Delta E$ , Y-EEF | $\Delta E$ , Z-EEF |
|---------|-------------|-------------|-------------|--------------------|--------------------|--------------------|
| -0.0030 | -304.653651 | -304.656830 | -304.656727 | -0.372075          | -5.042454          | -4.502882          |
| -0.0025 | -304.653780 | -304.656390 | -304.656257 | -0.354939          | -4.137646          | -3.611927          |
| -0.0020 | -304.653937 | -304.656001 | -304.655849 | -0.344962          | -3.299198          | -2.799817          |
| -0.0015 | -304.654123 | -304.655644 | -304.655504 | -0.341971          | -2.482479          | -2.070490          |
| -0.0010 | -304.654337 | -304.655340 | -304.655220 | -0.345794          | -1.742699          | -1.416281          |
| -0.0005 | -304.654579 | -304.654751 | -304.654772 | -0.356448          | -0.187689          | -0.248118          |
| +0.0000 | -304.654849 | -304.654849 | -304.654849 | -0.373845          | -0.373845          | -0.373845          |
| +0.0005 | -304.655148 | -304.655007 | -304.654995 | -0.398378          | -0.655309          | -0.598391          |
| +0.0010 | -304.655475 | -304.655215 | -304.655208 | -0.430151          | -1.002476          | -0.913309          |
| +0.0015 | -304.655831 | -304.655470 | -304.655487 | -0.469308          | -1.406906          | -1.319424          |
| +0.0020 | -304.656215 | -304.655769 | -304.655832 | -0.516179          | -1.864113          | -1.814620          |
| +0.0025 | -304.656629 | -304.656111 | -304.656240 | -0.571989          | -2.370462          | -2.391179          |
| +0.0030 | -304.657073 | -304.656496 | -304.656708 | -0.636673          | -2.921410          | -3.042527          |

**Table S142. Change in Energy of  $I_{1a}$  due to Optimisation under EEFs in MeCN.** Energy given in Hartree, changes in energy given in KJ/mol.

| Field   | E, X-EEF    | E, Y-EEF    | E, Z-EEF    | $\Delta E$ , X-EEF | $\Delta E$ , Y-EEF | $\Delta E$ , Z-EEF |
|---------|-------------|-------------|-------------|--------------------|--------------------|--------------------|
| -0.0030 | -304.794963 | -304.799805 | -304.799818 | -0.730002          | -1.441877          | -0.925161          |
| -0.0025 | -304.795597 | -304.799624 | -304.799633 | -0.740260          | -1.253626          | -0.896272          |
| -0.0020 | -304.796261 | -304.799476 | -304.799482 | -0.753180          | -1.101087          | -0.872674          |
| -0.0015 | -304.796954 | -304.799360 | -304.799364 | -0.768725          | -0.982060          | -0.854346          |
| -0.0010 | -304.797677 | -304.799278 | -304.799280 | -0.786873          | -0.898275          | -0.841278          |
| -0.0005 | -304.798430 | -304.799229 | -304.799230 | -0.807596          | -0.848194          | -0.833454          |
| +0.0000 | -304.799213 | -304.799213 | -304.799213 | -0.830871          | -0.830871          | -0.830871          |
| +0.0005 | -304.800025 | -304.799229 | -304.799230 | -0.856680          | -0.847703          | -0.833525          |
| +0.0010 | -304.800868 | -304.799278 | -304.799280 | -0.885004          | -0.897283          | -0.841423          |
| +0.0015 | -304.801741 | -304.799360 | -304.799364 | -0.915827          | -0.980519          | -0.854566          |
| +0.0020 | -304.802643 | -304.799475 | -304.799482 | -0.949142          | -1.099116          | -0.872966          |
| +0.0025 | -304.803576 | -304.799623 | -304.799633 | -0.984935          | -1.251069          | -0.896640          |
| +0.0030 | -304.804539 | -304.799804 | -304.799818 | -1.023199          | -1.438813          | -0.925602          |

**Table S143. Change in Energy of  $^3I_{1a}$  due to Optimisation under EEFs in MeCN.** Energy given in Hartree, changes in energy given in KJ/mol.

| Field   | E, X-EEF    | E, Y-EEF    | E, Z-EEF    | $\Delta E$ , X-EEF | $\Delta E$ , Y-EEF | $\Delta E$ , Z-EEF |
|---------|-------------|-------------|-------------|--------------------|--------------------|--------------------|
| -0.0030 | -304.652914 | -304.656455 | -304.656273 | -0.503495          | -5.861739          | -5.112655          |
| -0.0025 | -304.653054 | -304.655965 | -304.655761 | -0.484623          | -4.840837          | -4.124248          |
| -0.0020 | -304.653224 | -304.655514 | -304.655316 | -0.475163          | -3.850802          | -3.222746          |
| -0.0015 | -304.653425 | -304.655119 | -304.654937 | -0.474549          | -2.940660          | -2.409542          |
| -0.0010 | -304.653656 | -304.654769 | -304.654105 | -0.482478          | -2.080234          | -0.320230          |
| -0.0005 | -304.653918 | -304.654084 | -304.654118 | -0.498950          | -0.274023          | -0.362432          |
| +0.0000 | -304.654210 | -304.654210 | -304.654210 | -0.524494          | -0.524494          | -0.524494          |
| +0.0005 | -304.654532 | -304.654397 | -304.654375 | -0.558806          | -0.869933          | -0.791538          |
| +0.0010 | -304.654886 | -304.654639 | -304.654612 | -0.602471          | -1.288798          | -1.160870          |
| +0.0015 | -304.655270 | -304.654932 | -304.654921 | -0.656102          | -1.772034          | -1.631922          |
| +0.0020 | -304.655686 | -304.655273 | -304.655299 | -0.720490          | -2.313202          | -2.197801          |
| +0.0025 | -304.656134 | -304.655661 | -304.655743 | -0.796650          | -2.907463          | -2.850642          |
| +0.0030 | -304.656615 | -304.656094 | -304.656252 | -0.886243          | -3.550563          | -3.585212          |

**Table S144. Change in Energy of  $I_{1a}$  due to Optimisation under EEFs in Water.** Energy given in Hartree, changes in energy given in KJ/mol.

| Field   | E, X-EEF    | E, Y-EEF    | E, Z-EEF    | $\Delta E$ , X-EEF | $\Delta E$ , Y-EEF | $\Delta E$ , Z-EEF |
|---------|-------------|-------------|-------------|--------------------|--------------------|--------------------|
| -0.0030 | -304.780028 | -304.784929 | -304.784932 | -0.572661          | -1.265236          | -0.726177          |
| -0.0025 | -304.780668 | -304.784744 | -304.784746 | -0.575297          | -1.070926          | -0.696587          |
| -0.0020 | -304.781339 | -304.784592 | -304.784594 | -0.580719          | -0.911996          | -0.672417          |
| -0.0015 | -304.782040 | -304.784474 | -304.784475 | -0.588889          | -0.788404          | -0.653642          |
| -0.0010 | -304.782770 | -304.784390 | -304.784390 | -0.599777          | -0.700528          | -0.640252          |
| -0.0005 | -304.783531 | -304.784340 | -304.784340 | -0.613354          | -0.647713          | -0.632236          |
| +0.0000 | -304.784323 | -304.784323 | -304.784323 | -0.629590          | -0.629590          | -0.629590          |
| +0.0005 | -304.785144 | -304.784338 | -304.784340 | -0.648464          | -0.644085          | -0.632310          |
| +0.0010 | -304.785996 | -304.784390 | -304.784390 | -0.669957          | -0.699525          | -0.640399          |
| +0.0015 | -304.786878 | -304.784474 | -304.784475 | -0.694048          | -0.786904          | -0.653865          |
| +0.0020 | -304.787791 | -304.784592 | -304.784594 | -0.720726          | -0.909988          | -0.672711          |
| +0.0025 | -304.788734 | -304.784743 | -304.784746 | -0.749977          | -1.068418          | -0.696957          |
| +0.0030 | -304.789708 | -304.784928 | -304.784932 | -0.781793          | -1.262188          | -0.726620          |

**Table S145. Change in Energy of  $^3I_{1a}$  due to Optimisation under EEFs in Water.** Energy given in Hartree, changes in energy given in KJ/mol.

| Field   | E, X-EEF    | E, Y-EEF    | E, Z-EEF    | $\Delta E$ , X-EEF | $\Delta E$ , Y-EEF | $\Delta E$ , Z-EEF |
|---------|-------------|-------------|-------------|--------------------|--------------------|--------------------|
| -0.0030 | -304.641824 | -304.645156 | -304.644948 | -0.862876          | -5.616837          | -4.795702          |
| -0.0025 | -304.641981 | -304.644715 | -304.644505 | -0.881399          | -4.727029          | -3.991926          |
| -0.0020 | -304.642167 | -304.644319 | -304.644120 | -0.904886          | -3.885388          | -3.251918          |
| -0.0015 | -304.642382 | -304.643968 | -304.643797 | -0.933347          | -3.090647          | -2.587071          |
| -0.0010 | -304.642626 | -304.643662 | -304.643465 | -0.966759          | -2.345643          | -1.812259          |
| -0.0005 | -304.642899 | -304.643403 | -304.643134 | -1.005144          | -1.655866          | -0.949835          |
| +0.0000 | -304.643202 | -304.643202 | -304.643202 | -1.048551          | -1.048551          | -1.048551          |
| +0.0005 | -304.643534 | -304.643342 | -304.643334 | -1.097057          | -1.265139          | -1.227610          |
| +0.0010 | -304.643896 | -304.643533 | -304.643528 | -1.150835          | -1.547661          | -1.481764          |
| +0.0015 | -304.644288 | -304.643772 | -304.643783 | -1.210038          | -1.886829          | -1.809642          |
| +0.0020 | -304.644709 | -304.644059 | -304.644100 | -1.274880          | -2.279183          | -2.212084          |
| +0.0025 | -304.645161 | -304.644391 | -304.644479 | -1.345821          | -2.720924          | -2.688050          |
| +0.0030 | -304.645642 | -304.644768 | -304.644919 | -1.423197          | -3.208466          | -3.235774          |

## S6. Benchmark: Point Charges Approximately Reproduce D-LEF Electrostatic Switches

When the charged D-LEFs are replaced by simple point charges at the heavy-atom position (N/B) in the optimised structure of I<sub>1a</sub>, we observe that a negative charge raises the nucleophilicity, while a positive charge lowers it, and vice-versa.

We note that the effects of the positive charge upon the GEI values are unrealistically large in magnitude; we ascribe this to the lack of polarisation on the point charge, especially considering the already highly polarisable nature of the LUMO and its unfavourable interaction with a bare charge. To be specific, when the point charge is replaced by the corresponding cation, the latter can polarise to accommodate the unfavourable electrostatic interactions, reducing its impact on the measured quantities, while the former cannot. That reasonable results are seen for the corresponding anion is because the interactions between it and the LUMO are favourable and balanced.

**Table S146. Point Charge Benchmarks.** All quantities given in eV.

| Species                         | E(HOMO)    | E(LUMO)   | GEI       | N         | ΔGEI   | ΔN    |
|---------------------------------|------------|-----------|-----------|-----------|--------|-------|
| I <sub>1a</sub> No Charge       | -7.430886  | -0.159459 | 0.990406  | 3.492582  |        |       |
| I <sub>1a</sub> Positive Charge | -12.112334 | -9.120442 | 18.835519 | -1.188866 | 17.845 | -4.68 |
| I <sub>1a</sub> Negative Charge | -3.919801  | 1.973370  | 0.080360  | 7.003668  | -0.910 | 3.51  |
| I <sub>2a</sub> No Charge       | -7.491840  | -0.181228 | 1.006687  | 3.431628  |        |       |
| I <sub>2a</sub> Positive Charge | -12.386353 | -9.545483 | 21.164537 | -1.462884 | 20.158 | -4.89 |
| I <sub>2a</sub> Negative Charge | -3.826738  | 1.923845  | 0.078709  | 7.096731  | -0.912 | 3.67  |

## S7. Benchmark: Comparison of CCSD(T) and DFT Energies of $I_{1a}$ under EEFs

The relative changes in energy of the singlet  $I_{1a}$  at the M06-2X and CCSD(T) levels of theory compare favourably, being in the X-axis 15.46 kJ/mol and 15.65 kJ/mol in each case, and negligible along the other axes. For the triplet, these values along the X-axis are 5.94 kJ/mol and 6.08 kJ/mol, respectively, and negligible along the other axes.

**Table S147. Energy of  $I_{1a}$  Under EEFs in Gas at CCSD(T)/aug-cc-pVTZ//M06-2X/aug-cc-pVTZ.** Energy given in Hartree.

| Field   | Energy, X-EEF | Energy, Y-EEF | Energy, Z-EEF |
|---------|---------------|---------------|---------------|
| -0.0030 | -304.280532   | -304.283405   | -304.283584   |
| -0.0020 | -304.281328   | -304.283267   | -304.283346   |
| -0.0010 | -304.282202   | -304.283184   | -304.283204   |
| +0.0000 | -304.283156   | -304.283156   | -304.283156   |
| +0.0010 | -304.284189   | -304.283184   | -304.283204   |
| +0.0020 | -304.285301   | -304.283267   | -304.283346   |
| +0.0030 | -304.286493   | -304.283405   | -304.283584   |

**Table S148. Energy of  $^3I_{1a}$  Under EEFs in Gas at CCSD(T)/aug-cc-pVTZ//M06-2X/aug-cc-pVTZ.** Energy given in Hartree.

| Field   | Energy, X-EEF | Energy, Y-EEF | Energy, Z-EEF |
|---------|---------------|---------------|---------------|
| -0.0030 | -304.143339   | -304.144318   | -304.144397   |
| -0.0020 | -304.143535   | -304.144190   | -304.144218   |
| -0.0010 | -304.143807   | -304.144135   | -304.144137   |
| +0.0000 | -304.144155   | -304.144155   | -304.144155   |
| +0.0010 | -304.144579   | -304.144248   | -304.144271   |
| +0.0020 | -304.145079   | -304.144416   | -304.144486   |
| +0.0030 | -304.145656   | -304.144658   | -304.144799   |

## S8. Benchmark: Investigation of Spin-State Switching of Simple Carbenes Under EEFs

We selected several carbenes, given below, to assess whether it was feasible to switch the spin state of simple carbenes under EEFs. Broadly, we found that it was not feasible under the field strengths we investigated. These field strengths were chosen to be physically reasonable, with reference to our previous STM experiments, in the range of  $\pm 0.003$  a.u. Calculations were performed at the M06-2X/def2-TZVP level of theory.

Of all the species given below, we only observe electrostatic switching of spin states with A12 and A21.

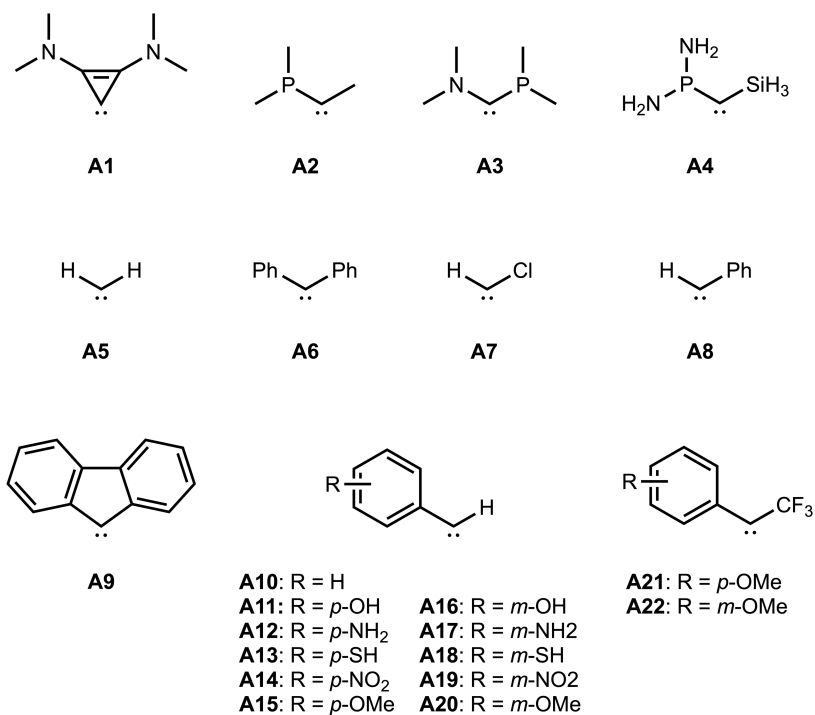

Figure S138. Species Selected for Possible Spin Switching Under EEFs.

**Table S149. Energy of A1 and <sup>3</sup>A1 Under EEFs in Gas.** Energy given in Hartree, changes in energy given in kJ/mol.

| Field   | Energy A1,<br>X-EEF | Energy A1,<br>Y-EEF | Energy A1,<br>Z-EEF | Energy <sup>3</sup> A1,<br>X-EEF | Energy <sup>3</sup> A1,<br>Y-EEF | Energy <sup>3</sup> A1,<br>Z-EEF | $\Delta E_{ST}$ , X-<br>EEF | $\Delta E_{ST}$ , Y-<br>EEF | $\Delta E_{ST}$ , Z-<br>EEF |
|---------|---------------------|---------------------|---------------------|----------------------------------|----------------------------------|----------------------------------|-----------------------------|-----------------------------|-----------------------------|
| -0.0030 | -383.303884         | -383.308712         | -383.309583         | -383.195103                      | -383.199942                      | -383.200131                      | -285.61                     | -285.58                     | -287.37                     |
| -0.0025 | -383.304673         | -383.308713         | -383.309400         | -383.195562                      | -383.199602                      | -383.199732                      | -286.47                     | -286.47                     | -287.93                     |
| -0.0020 | -383.305487         | -383.308732         | -383.309251         | -383.196046                      | -383.199285                      | -383.199366                      | -287.34                     | -287.35                     | -288.50                     |
| -0.0015 | -383.306324         | -383.308769         | -383.309134         | -383.196556                      | -383.198989                      | -383.199034                      | -288.20                     | -288.23                     | -289.07                     |
| -0.0010 | -383.307187         | -383.308823         | -383.309051         | -383.197090                      | -383.198716                      | -383.198735                      | -289.06                     | -289.09                     | -289.63                     |
| -0.0005 | -383.308073         | -383.308895         | -383.309001         | -383.197650                      | -383.198465                      | -383.198469                      | -289.91                     | -289.93                     | -290.20                     |
| +0.0000 | -383.308984         | -383.308984         | -383.308984         | -383.198236                      | -383.198236                      | -383.198236                      | -290.77                     | -290.77                     | -290.77                     |
| +0.0005 | -383.309919         | -383.309091         | -383.309001         | -383.198847                      | -383.198029                      | -383.198036                      | -291.62                     | -291.59                     | -291.34                     |
| +0.0010 | -383.310879         | -383.309216         | -383.309051         | -383.199483                      | -383.197844                      | -383.197870                      | -292.47                     | -292.41                     | -291.90                     |
| +0.0015 | -383.311863         | -383.309358         | -383.309134         | -383.200144                      | -383.197681                      | -383.197737                      | -293.32                     | -293.21                     | -292.47                     |
| +0.0020 | -383.312872         | -383.309517         | -383.309250         | -383.200831                      | -383.197539                      | -383.197637                      | -294.16                     | -294.00                     | -293.04                     |
| +0.0025 | -383.313905         | -383.309694         | -383.309400         | -383.201544                      | -383.197420                      | -383.197571                      | -295.00                     | -294.78                     | -293.61                     |
| +0.0030 | -383.314962         | -383.309889         | -383.309583         | -383.202281                      | -383.197323                      | -383.197538                      | -295.84                     | -295.54                     | -294.17                     |

**Table S150. Energy of A2 and <sup>3</sup>A2 Under EEFs in Gas.** Energy given in Hartree, changes in energy given in kJ/mol.

| Field   | Energy A2,<br>X-EEF | Energy A2,<br>Y-EEF | Energy A2,<br>Z-EEF | Energy <sup>3</sup> A2,<br>X-EEF | Energy <sup>3</sup> A2,<br>Y-EEF | Energy <sup>3</sup> A2,<br>Z-EEF | $\Delta E_{ST}$ , X-<br>EEF | $\Delta E_{ST}$ , Y-<br>EEF | $\Delta E_{ST}$ ,<br>Z-EEF |
|---------|---------------------|---------------------|---------------------|----------------------------------|----------------------------------|----------------------------------|-----------------------------|-----------------------------|----------------------------|
| -0.0030 | -499.055716         | -499.058211         | -499.061321         | -499.044275                      | -499.043858                      | -499.043805                      | -30.04                      | -37.68                      | -45.99                     |
| -0.0025 | -499.056043         | -499.058137         | -499.060699         | -499.044103                      | -499.043751                      | -499.043693                      | -31.35                      | -37.77                      | -44.65                     |
| -0.0020 | -499.056390         | -499.058076         | -499.060102         | -499.043948                      | -499.043662                      | -499.043606                      | -32.67                      | -37.84                      | -43.31                     |
| -0.0015 | -499.056756         | -499.058029         | -499.059531         | -499.043808                      | -499.043592                      | -499.043541                      | -33.99                      | -37.91                      | -41.98                     |
| -0.0010 | -499.057141         | -499.057996         | -499.058985         | -499.043685                      | -499.043539                      | -499.043500                      | -35.33                      | -37.96                      | -40.66                     |
| -0.0005 | -499.057545         | -499.057975         | -499.058464         | -499.043578                      | -499.043504                      | -499.043482                      | -36.67                      | -38.00                      | -39.34                     |
| +0.0000 | -499.057969         | -499.057969         | -499.057969         | -499.043487                      | -499.043487                      | -499.043487                      | -38.02                      | -38.02                      | -38.02                     |
| +0.0005 | -499.058412         | -499.057976         | -499.057499         | -499.043412                      | -499.043488                      | -499.043515                      | -39.38                      | -38.04                      | -36.71                     |
| +0.0010 | -499.058874         | -499.057997         | -499.057054         | -499.043353                      | -499.043507                      | -499.043567                      | -40.75                      | -38.04                      | -35.41                     |
| +0.0015 | -499.059356         | -499.058031         | -499.056634         | -499.043311                      | -499.043544                      | -499.043641                      | -42.13                      | -38.03                      | -34.11                     |
| +0.0020 | -499.059857         | -499.058078         | -499.056240         | -499.043284                      | -499.043599                      | -499.043739                      | -43.51                      | -38.02                      | -32.82                     |
| +0.0025 | -499.060378         | -499.058139         | -499.055871         | -499.043274                      | -499.043672                      | -499.043861                      | -44.90                      | -37.98                      | -31.53                     |
| +0.0030 | -499.060917         | -499.058214         | -499.055527         | -499.043280                      | -499.043763                      | -499.044005                      | -46.31                      | -37.94                      | -30.25                     |



**Table S151. Energy of A3 and <sup>3</sup>A3 Under EEFs in Gas.** Energy given in Hartree, changes in energy given in kJ/mol.

| Field   | Energy A3, X-EEF | Energy A3, Y-EEF | Energy A3, Z-EEF | Energy <sup>3</sup> A3, X-EEF | Energy <sup>3</sup> A3, Y-EEF | Energy <sup>3</sup> A3, Z-EEF | $\Delta E_{ST}$ , X-EEF | $\Delta E_{ST}$ , Y-EEF | $\Delta E_{ST}$ , Z-EEF |
|---------|------------------|------------------|------------------|-------------------------------|-------------------------------|-------------------------------|-------------------------|-------------------------|-------------------------|
| -0.0030 | 593.742181       | 593.743284       | 593.747248       | 593.696529                    | 593.696100                    | 593.698251                    | -119.86                 | -123.88                 | -128.64                 |
| -0.0025 | 593.742470       | 593.743399       | 593.746674       | 593.696425                    | 593.696065                    | 593.697834                    | -120.89                 | -124.28                 | -128.23                 |
| -0.0020 | 593.742783       | 593.743534       | 593.746132       | 593.696343                    | 593.696052                    | 593.697448                    | -121.93                 | -124.66                 | -127.82                 |
| -0.0015 | 593.743119       | 593.743689       | 593.745620       | 593.696282                    | 593.696062                    | 593.697095                    | -122.97                 | -125.04                 | -127.40                 |
| -0.0010 | 593.743480       | 593.743863       | 593.745139       | 593.696243                    | 593.696095                    | 593.696774                    | -124.02                 | -125.41                 | -126.98                 |
| -0.0005 | 593.743863       | 593.744057       | 593.744689       | 593.696225                    | 593.696150                    | 593.696485                    | -125.08                 | -125.78                 | -126.56                 |
| +0.0000 | 593.744270       | 593.744270       | 593.744270       | 593.696228                    | 593.696228                    | 593.696228                    | -126.14                 | -126.14                 | -126.14                 |
| +0.0005 | 593.744701       | 593.744504       | 593.743883       | 593.696253                    | 593.696328                    | 593.696003                    | -127.20                 | -126.48                 | -125.71                 |
| +0.0010 | 593.745156       | 593.744757       | 593.743526       | 593.696299                    | 593.696451                    | 593.695811                    | -128.27                 | -126.83                 | -125.27                 |
| +0.0015 | 593.745634       | 593.745029       | 593.743199       | 593.696367                    | 593.696597                    | 593.695650                    | -129.35                 | -127.16                 | -124.84                 |
| +0.0020 | 593.746135       | 593.745321       | 593.742904       | 593.696456                    | 593.696765                    | 593.695522                    | -130.43                 | -127.48                 | -124.40                 |
| +0.0025 | 593.746660       | 593.745633       | 593.742640       | 593.696567                    | 593.696956                    | 593.695426                    | -131.52                 | -127.80                 | -123.96                 |
| +0.0030 | 593.747209       | 593.745964       | 593.742407       | 593.696699                    | 593.697169                    | 593.695362                    | -132.61                 | -128.11                 | -123.52                 |

**Table S152. Energy of A4 and <sup>3</sup>A4 Under EEFs in Gas.** Energy given in Hartree, changes in energy given in kJ/mol.

| Field   | Energy A4, X-EEF | Energy A4, Y-EEF | Energy A4, Z-EEF | Energy <sup>3</sup> A4, X-EEF | Energy <sup>3</sup> A4, Y-EEF | Energy <sup>3</sup> A4, Z-EEF | $\Delta E_{ST}$ , X-EEF | $\Delta E_{ST}$ , Y-EEF | $\Delta E_{ST}$ , Z-EEF |
|---------|------------------|------------------|------------------|-------------------------------|-------------------------------|-------------------------------|-------------------------|-------------------------|-------------------------|
| -0.0030 | -782.573527      | -782.575738      | -782.581885      | -782.546026                   | -782.545414                   | -782.545889                   | -72.20                  | -79.61                  | -94.51                  |
| -0.0025 | -782.573805      | -782.575659      | -782.580747      | -782.545672                   | -782.545158                   | -782.545532                   | -73.86                  | -80.08                  | -92.46                  |
| -0.0020 | -782.574103      | -782.575594      | -782.579638      | -782.545334                   | -782.544919                   | -782.545201                   | -75.53                  | -80.54                  | -90.41                  |
| -0.0015 | -782.574418      | -782.575543      | -782.578556      | -782.545013                   | -782.544699                   | -782.544898                   | -77.20                  | -80.98                  | -88.37                  |
| -0.0010 | -782.574753      | -782.575507      | -782.577502      | -782.544709                   | -782.544498                   | -782.544622                   | -78.88                  | -81.42                  | -86.33                  |
| -0.0005 | -782.575106      | -782.575485      | -782.576476      | -782.544421                   | -782.544314                   | -782.544372                   | -80.56                  | -81.84                  | -84.29                  |
| +0.0000 | -782.575477      | -782.575477      | -782.575477      | -782.544149                   | -782.544149                   | -782.544149                   | -82.25                  | -82.25                  | -82.25                  |
| +0.0005 | -782.575867      | -782.575483      | -782.574506      | -782.543894                   | -782.544003                   | -782.543953                   | -83.94                  | -82.65                  | -80.22                  |
| +0.0010 | -782.576276      | -782.575504      | -782.573564      | -782.543656                   | -782.543875                   | -782.543784                   | -85.64                  | -83.04                  | -78.19                  |
| +0.0015 | -782.576703      | -782.575539      | -782.572648      | -782.543434                   | -782.543765                   | -782.543642                   | -87.35                  | -83.42                  | -76.16                  |
| +0.0020 | -782.577149      | -782.575588      | -782.571761      | -782.543229                   | -782.543673                   | -782.543526                   | -89.06                  | -83.79                  | -74.13                  |
| +0.0025 | -782.577613      | -782.575651      | -782.570901      | -782.543041                   | -782.543600                   | -782.543437                   | -90.77                  | -84.15                  | -72.11                  |
| +0.0030 | -782.578096      | -782.575729      | -782.570070      | -782.542869                   | -782.543545                   | -782.543374                   | -92.49                  | -84.50                  | -70.09                  |

**Table S153. Energy of A5 and <sup>3</sup>A5 Under EEFs in Gas.** Energy given in Hartree, changes in energy given in kJ/mol.

| Field   | Energy A5, X-EEF | Energy A5, Y-EEF | Energy A5, Z-EEF | Energy <sup>3</sup> A5, X-EEF | Energy <sup>3</sup> A5, Y-EEF | Energy <sup>3</sup> A5, Z-EEF | $\Delta E_{ST}$ , X-EEF | $\Delta E_{ST}$ , Y-EEF | $\Delta E_{ST}$ , Z-EEF |
|---------|------------------|------------------|------------------|-------------------------------|-------------------------------|-------------------------------|-------------------------|-------------------------|-------------------------|
| -0.0030 | -39.120717       | -39.122949       | -39.122974       | -39.143871                    | -39.144625                    | -39.144639                    | 60.79                   | 56.91                   | 56.88                   |
| -0.0025 | -39.121073       | -39.122935       | -39.122952       | -39.143982                    | -39.144610                    | -39.144620                    | 60.15                   | 56.91                   | 56.89                   |
| -0.0020 | -39.121431       | -39.122923       | -39.122934       | -39.144096                    | -39.144598                    | -39.144605                    | 59.51                   | 56.91                   | 56.90                   |
| -0.0015 | -39.121794       | -39.122914       | -39.122920       | -39.144213                    | -39.144589                    | -39.144593                    | 58.86                   | 56.91                   | 56.90                   |
| -0.0010 | -39.122160       | -39.122907       | -39.122910       | -39.144332                    | -39.144583                    | -39.144584                    | 58.21                   | 56.91                   | 56.91                   |
| -0.0005 | -39.122529       | -39.122903       | -39.122904       | -39.144453                    | -39.144579                    | -39.144579                    | 57.56                   | 56.91                   | 56.91                   |
| +0.0000 | -39.122902       | -39.122902       | -39.122902       | -39.144577                    | -39.144577                    | -39.144577                    | 56.91                   | 56.91                   | 56.91                   |
| +0.0005 | -39.123279       | -39.122903       | -39.122904       | -39.144704                    | -39.144579                    | -39.144579                    | 56.25                   | 56.91                   | 56.91                   |
| +0.0010 | -39.123659       | -39.122907       | -39.122910       | -39.144833                    | -39.144583                    | -39.144584                    | 55.59                   | 56.91                   | 56.91                   |
| +0.0015 | -39.124042       | -39.122914       | -39.122920       | -39.144965                    | -39.144589                    | -39.144593                    | 54.93                   | 56.91                   | 56.90                   |
| +0.0020 | -39.124429       | -39.122923       | -39.122934       | -39.145100                    | -39.144598                    | -39.144605                    | 54.27                   | 56.91                   | 56.90                   |
| +0.0025 | -39.124820       | -39.122935       | -39.122952       | -39.145237                    | -39.144610                    | -39.144620                    | 53.60                   | 56.91                   | 56.89                   |
| +0.0030 | -39.125214       | -39.122949       | -39.122974       | -39.145376                    | -39.144625                    | -39.144639                    | 52.94                   | 56.91                   | 56.88                   |

**Table S154. Energy of A6 and <sup>3</sup>A6 Under EEFs in Gas.** Energy given in Hartree, changes in energy given in kJ/mol.

| Field   | Energy A6, X-EEF | Energy A6, Y-EEF | Energy A6, Z-EEF | Energy <sup>3</sup> A6, X-EEF | Energy <sup>3</sup> A6, Y-EEF | Energy <sup>3</sup> A6, Z-EEF | $\Delta E_{ST}$ , X-EEF | $\Delta E_{ST}$ , Y-EEF | $\Delta E_{ST}$ , Z-EEF |
|---------|------------------|------------------|------------------|-------------------------------|-------------------------------|-------------------------------|-------------------------|-------------------------|-------------------------|
| -0.0030 | -501.246528      | -501.249412      | -501.250147      | -501.259118                   | -501.259599                   | -501.260361                   | 33.05                   | 26.75                   | 26.82                   |
| -0.0025 | -501.246848      | -501.249275      | -501.249785      | -501.259046                   | -501.259479                   | -501.260008                   | 32.02                   | 26.79                   | 26.84                   |
| -0.0020 | -501.247203      | -501.249163      | -501.249489      | -501.259009                   | -501.259380                   | -501.259719                   | 31.00                   | 26.83                   | 26.86                   |
| -0.0015 | -501.247592      | -501.249076      | -501.249259      | -501.259006                   | -501.259304                   | -501.259494                   | 29.97                   | 26.85                   | 26.87                   |
| -0.0010 | -501.248015      | -501.249013      | -501.249095      | -501.259038                   | -501.259249                   | -501.259334                   | 28.94                   | 26.87                   | 26.88                   |
| -0.0005 | -501.248472      | -501.248976      | -501.248996      | -501.259104                   | -501.259216                   | -501.259238                   | 27.92                   | 26.89                   | 26.89                   |
| +0.0000 | -501.248964      | -501.248964      | -501.248964      | -501.259206                   | -501.259206                   | -501.259206                   | 26.89                   | 26.89                   | 26.89                   |
| +0.0005 | -501.249489      | -501.248976      | -501.248996      | -501.259341                   | -501.259216                   | -501.259238                   | 25.87                   | 26.89                   | 26.89                   |
| +0.0010 | -501.250050      | -501.249013      | -501.249095      | -501.259512                   | -501.259249                   | -501.259334                   | 24.84                   | 26.87                   | 26.88                   |
| +0.0015 | -501.250644      | -501.249076      | -501.249259      | -501.259717                   | -501.259304                   | -501.259494                   | 23.82                   | 26.85                   | 26.87                   |
| +0.0020 | -501.251273      | -501.249163      | -501.249489      | -501.259956                   | -501.259380                   | -501.259719                   | 22.80                   | 26.83                   | 26.86                   |
| +0.0025 | -501.251936      | -501.249275      | -501.249785      | -501.260230                   | -501.259479                   | -501.260008                   | 21.78                   | 26.79                   | 26.84                   |
| +0.0030 | -501.252633      | -501.249412      | -501.250147      | -501.260539                   | -501.259599                   | -501.260361                   | 20.76                   | 26.75                   | 26.82                   |

**Table S155. Energy of A7 and <sup>3</sup>A7 Under EEFs in Gas.** Energy given in Hartree, changes in energy given in kJ/mol.

| Field   | Energy A7, X-EEF | Energy A7, Y-EEF | Energy A7, Z-EEF | Energy <sup>3</sup> A7, X-EEF | Energy <sup>3</sup> A7, Y-EEF | Energy <sup>3</sup> A7, Z-EEF | $\Delta E_{ST, X-EEF}$ | $\Delta E_{ST, Y-EEF}$ | $\Delta E_{ST, Z-EEF}$ |
|---------|------------------|------------------|------------------|-------------------------------|-------------------------------|-------------------------------|------------------------|------------------------|------------------------|
| -0.0030 | -498.758577      | -498.760447      | -498.760330      | -498.755339                   | -498.755954                   | -498.755276                   | -8.50                  | -11.80                 | -13.27                 |
| -0.0025 | -498.758861      | -498.760422      | -498.760316      | -498.755417                   | -498.755931                   | -498.755357                   | -9.04                  | -11.79                 | -13.02                 |
| -0.0020 | -498.759151      | -498.760402      | -498.760310      | -498.755500                   | -498.755912                   | -498.755445                   | -9.59                  | -11.79                 | -12.77                 |
| -0.0015 | -498.759446      | -498.760386      | -498.760312      | -498.755588                   | -498.755898                   | -498.755542                   | -10.13                 | -11.78                 | -12.52                 |
| -0.0010 | -498.759747      | -498.760375      | -498.760322      | -498.755680                   | -498.755887                   | -498.755647                   | -10.68                 | -11.78                 | -12.27                 |
| -0.0005 | -498.760054      | -498.760368      | -498.760340      | -498.755777                   | -498.755881                   | -498.755759                   | -11.23                 | -11.78                 | -12.03                 |
| +0.0000 | -498.760366      | -498.760366      | -498.760366      | -498.755879                   | -498.755879                   | -498.755879                   | -11.78                 | -11.78                 | -11.78                 |
| +0.0005 | -498.760684      | -498.760368      | -498.760400      | -498.755985                   | -498.755881                   | -498.756007                   | -12.34                 | -11.78                 | -11.53                 |
| +0.0010 | -498.761007      | -498.760375      | -498.760442      | -498.756097                   | -498.755887                   | -498.756142                   | -12.89                 | -11.78                 | -11.29                 |
| +0.0015 | -498.761336      | -498.760386      | -498.760493      | -498.756212                   | -498.755898                   | -498.756286                   | -13.45                 | -11.78                 | -11.05                 |
| +0.0020 | -498.761670      | -498.760402      | -498.760551      | -498.756333                   | -498.755912                   | -498.756437                   | -14.01                 | -11.79                 | -10.80                 |
| +0.0025 | -498.762011      | -498.760422      | -498.760617      | -498.756458                   | -498.755931                   | -498.756595                   | -14.58                 | -11.79                 | -10.56                 |
| +0.0030 | -498.762356      | -498.760447      | -498.760692      | -498.756588                   | -498.755954                   | -498.756762                   | -15.14                 | -11.80                 | -10.32                 |

**Table S156. Energy of A8 and <sup>3</sup>A8 Under EEFs in Gas.** Energy given in Hartree, changes in energy given in kJ/mol.

| Field   | Energy A8, X-EEF | Energy A8, Y-EEF | Energy A8, Z-EEF | Energy <sup>3</sup> A8, X-EEF | Energy <sup>3</sup> A8, Y-EEF | Energy <sup>3</sup> A8, Z-EEF | $\Delta E_{ST, X-EEF}$ | $\Delta E_{ST, Y-EEF}$ | $\Delta E_{ST, Z-EEF}$ |
|---------|------------------|------------------|------------------|-------------------------------|-------------------------------|-------------------------------|------------------------|------------------------|------------------------|
| -0.0030 | -270.187722      | -270.190979      | -270.194457      | -270.202620                   | -270.203178                   | -270.203640                   | 39.12                  | 32.03                  | 24.11                  |
| -0.0025 | -270.188174      | -270.190916      | -270.193776      | -270.202627                   | -270.203117                   | -270.203461                   | 37.95                  | 32.03                  | 25.43                  |
| -0.0020 | -270.188649      | -270.190865      | -270.193122      | -270.202656                   | -270.203067                   | -270.203310                   | 36.77                  | 32.04                  | 26.75                  |
| -0.0015 | -270.189147      | -270.190826      | -270.192494      | -270.202705                   | -270.203029                   | -270.203187                   | 35.60                  | 32.04                  | 28.07                  |
| -0.0010 | -270.189667      | -270.190797      | -270.191894      | -270.202775                   | -270.203001                   | -270.203090                   | 34.42                  | 32.04                  | 29.39                  |
| -0.0005 | -270.190209      | -270.190780      | -270.191321      | -270.202866                   | -270.202984                   | -270.203021                   | 33.23                  | 32.04                  | 30.72                  |
| +0.0000 | -270.190775      | -270.190775      | -270.190775      | -270.202979                   | -270.202979                   | -270.202979                   | 32.04                  | 32.04                  | 32.04                  |
| +0.0005 | -270.191363      | -270.190780      | -270.190255      | -270.203112                   | -270.202984                   | -270.202964                   | 30.85                  | 32.04                  | 33.37                  |
| +0.0010 | -270.191973      | -270.190798      | -270.189763      | -270.203266                   | -270.203001                   | -270.202976                   | 29.65                  | 32.04                  | 34.69                  |
| +0.0015 | -270.192606      | -270.190826      | -270.189297      | -270.203442                   | -270.203029                   | -270.203015                   | 28.45                  | 32.04                  | 36.02                  |
| +0.0020 | -270.193262      | -270.190866      | -270.188857      | -270.203639                   | -270.203067                   | -270.203081                   | 27.24                  | 32.04                  | 37.35                  |
| +0.0025 | -270.193940      | -270.190917      | -270.188445      | -270.203856                   | -270.203117                   | -270.203175                   | 26.03                  | 32.03                  | 38.67                  |
| +0.0030 | -270.194641      | -270.190979      | -270.188059      | -270.204095                   | -270.203178                   | -270.203296                   | 24.82                  | 32.03                  | 40.00                  |

**Table S157. Energy of A9 and <sup>3</sup>A9 Under EEFs in Gas.** Energy given in Hartree, changes in energy given in kJ/mol.

| Field   | Energy A9, X-EEF | Energy A9, Y-EEF | Energy A9, Z-EEF | Energy <sup>3</sup> A9, X-EEF | Energy <sup>3</sup> A9, Y-EEF | Energy <sup>3</sup> A9, Z-EEF | $\Delta E_{ST}$ , X-EEF | $\Delta E_{ST}$ , Y-EEF | $\Delta E_{ST}$ , Z-EEF |
|---------|------------------|------------------|------------------|-------------------------------|-------------------------------|-------------------------------|-------------------------|-------------------------|-------------------------|
| -0.0030 | -500.045394      | -500.049182      | -500.049909      | -500.060090                   | -500.060581                   | -500.061315                   | 38.59                   | 29.93                   | 29.95                   |
| -0.0025 | -500.045875      | -500.049080      | -500.049584      | -500.060027                   | -500.060482                   | -500.060992                   | 37.15                   | 29.94                   | 29.95                   |
| -0.0020 | -500.046395      | -500.048996      | -500.049319      | -500.059999                   | -500.060400                   | -500.060727                   | 35.72                   | 29.94                   | 29.95                   |
| -0.0015 | -500.046951      | -500.048931      | -500.049113      | -500.060009                   | -500.060337                   | -500.060521                   | 34.28                   | 29.95                   | 29.95                   |
| -0.0010 | -500.047546      | -500.048885      | -500.048966      | -500.060055                   | -500.060292                   | -500.060374                   | 32.84                   | 29.95                   | 29.95                   |
| -0.0005 | -500.048178      | -500.048857      | -500.048877      | -500.060137                   | -500.060265                   | -500.060286                   | 31.40                   | 29.95                   | 29.95                   |
| +0.0000 | -500.048848      | -500.048848      | -500.048848      | -500.060256                   | -500.060256                   | -500.060256                   | 29.95                   | 29.95                   | 29.95                   |
| +0.0005 | -500.049555      | -500.048857      | -500.048877      | -500.060412                   | -500.060265                   | -500.060286                   | 28.50                   | 29.95                   | 29.95                   |
| +0.0010 | -500.050300      | -500.048885      | -500.048966      | -500.060604                   | -500.060292                   | -500.060374                   | 27.05                   | 29.95                   | 29.95                   |
| +0.0015 | -500.051083      | -500.048931      | -500.049113      | -500.060833                   | -500.060337                   | -500.060521                   | 25.60                   | 29.95                   | 29.95                   |
| +0.0020 | -500.051904      | -500.048996      | -500.049319      | -500.061098                   | -500.060400                   | -500.060727                   | 24.14                   | 29.94                   | 29.95                   |
| +0.0025 | -500.052762      | -500.049080      | -500.049584      | -500.061400                   | -500.060482                   | -500.060992                   | 22.68                   | 29.94                   | 29.95                   |
| +0.0030 | -500.053658      | -500.049182      | -500.049909      | -500.061739                   | -500.060581                   | -500.061315                   | 21.22                   | 29.93                   | 29.95                   |

**Table S158. Energy of A10 and <sup>3</sup>A10 Under EEFs in Gas.** Energy given in Hartree, changes in energy given in kJ/mol.

| Field   | Energy A10, X-EEF | Energy A10, Y-EEF | Energy A10, Z-EEF | Energy <sup>3</sup> A10, X-EEF | Energy <sup>3</sup> A10, Y-EEF | Energy <sup>3</sup> A10, Z-EEF | $\Delta E_{ST}$ , X-EEF | $\Delta E_{ST}$ , Y-EEF | $\Delta E_{ST}$ , Z-EEF |
|---------|-------------------|-------------------|-------------------|--------------------------------|--------------------------------|--------------------------------|-------------------------|-------------------------|-------------------------|
| -0.0030 | -270.187722       | -270.190979       | -270.194457       | -270.202620                    | -270.203178                    | -270.203640                    | 39.12                   | 32.03                   | 24.11                   |
| -0.0025 | -270.188174       | -270.190917       | -270.193776       | -270.202627                    | -270.203117                    | -270.203461                    | 37.95                   | 32.03                   | 25.43                   |
| -0.0020 | -270.188649       | -270.190866       | -270.193122       | -270.202656                    | -270.203067                    | -270.203310                    | 36.77                   | 32.04                   | 26.75                   |
| -0.0015 | -270.189147       | -270.190826       | -270.192495       | -270.202705                    | -270.203028                    | -270.203187                    | 35.60                   | 32.04                   | 28.07                   |
| -0.0010 | -270.189667       | -270.190797       | -270.191894       | -270.202775                    | -270.203001                    | -270.203090                    | 34.42                   | 32.04                   | 29.39                   |
| -0.0005 | -270.190209       | -270.190780       | -270.191321       | -270.202866                    | -270.202984                    | -270.203021                    | 33.23                   | 32.04                   | 30.72                   |
| +0.0000 | -270.190775       | -270.190775       | -270.190775       | -270.202979                    | -270.202979                    | -270.202979                    | 32.04                   | 32.04                   | 32.04                   |
| +0.0005 | -270.191363       | -270.190780       | -270.190255       | -270.203112                    | -270.202984                    | -270.202964                    | 30.85                   | 32.04                   | 33.37                   |
| +0.0010 | -270.191973       | -270.190797       | -270.189762       | -270.203266                    | -270.203001                    | -270.202976                    | 29.65                   | 32.04                   | 34.69                   |
| +0.0015 | -270.192606       | -270.190826       | -270.189296       | -270.203442                    | -270.203029                    | -270.203015                    | 28.45                   | 32.04                   | 36.02                   |
| +0.0020 | -270.193262       | -270.190866       | -270.188857       | -270.203638                    | -270.203067                    | -270.203081                    | 27.24                   | 32.04                   | 37.35                   |
| +0.0025 | -270.193940       | -270.190917       | -270.188444       | -270.203856                    | -270.203117                    | -270.203175                    | 26.03                   | 32.03                   | 38.67                   |
| +0.0030 | -270.194641       | -270.190979       | -270.188058       | -270.204095                    | -270.203178                    | -270.203295                    | 24.82                   | 32.03                   | 40.00                   |

**Table S159. Energy of A11 and <sup>3</sup>A11 Under EEFs in Gas.** Energy given in Hartree, changes in energy given in kJ/mol.

| Field   | Energy A11, X-EEF | Energy A11, Y-EEF | Energy A11, Z-EEF | Energy <sup>3</sup> A11, X-EEF | Energy <sup>3</sup> A11, Y-EEF | Energy <sup>3</sup> A11, Z-EEF | $\Delta E_{ST}$ , X-EEF | $\Delta E_{ST}$ , Y-EEF | $\Delta E_{ST}$ , Z-EEF |
|---------|-------------------|-------------------|-------------------|--------------------------------|--------------------------------|--------------------------------|-------------------------|-------------------------|-------------------------|
| -0.0030 | -345.428062       | -345.430325       | -345.435448       | -345.436692                    | -345.435864                    | -345.437259                    | 22.66                   | 14.54                   | 4.76                    |
| -0.0025 | -345.428345       | -345.430260       | -345.434479       | -345.436465                    | -345.435801                    | -345.436914                    | 21.32                   | 14.55                   | 6.39                    |
| -0.0020 | -345.428650       | -345.430206       | -345.433542       | -345.436260                    | -345.435749                    | -345.436601                    | 19.98                   | 14.55                   | 8.03                    |
| -0.0015 | -345.428980       | -345.430164       | -345.432637       | -345.436076                    | -345.435709                    | -345.436318                    | 18.63                   | 14.56                   | 9.67                    |
| -0.0010 | -345.429333       | -345.430134       | -345.431763       | -345.435915                    | -345.435680                    | -345.436067                    | 17.28                   | 14.56                   | 11.30                   |
| -0.0005 | -345.429709       | -345.430116       | -345.430921       | -345.435775                    | -345.435663                    | -345.435846                    | 15.93                   | 14.56                   | 12.93                   |
| +0.0000 | -345.430109       | -345.430109       | -345.430109       | -345.435657                    | -345.435657                    | -345.435657                    | 14.56                   | 14.56                   | 14.56                   |
| +0.0005 | -345.430533       | -345.430115       | -345.429329       | -345.435561                    | -345.435663                    | -345.435498                    | 13.20                   | 14.57                   | 16.20                   |
| +0.0010 | -345.430981       | -345.430132       | -345.428580       | -345.435486                    | -345.435680                    | -345.435370                    | 11.83                   | 14.57                   | 17.83                   |
| +0.0015 | -345.431452       | -345.430161       | -345.427862       | -345.435433                    | -345.435709                    | -345.435272                    | 10.45                   | 14.57                   | 19.46                   |
| +0.0020 | -345.431946       | -345.430202       | -345.427175       | -345.435402                    | -345.435750                    | -345.435206                    | 9.07                    | 14.56                   | 21.08                   |
| +0.0025 | -345.432465       | -345.430255       | -345.426519       | -345.435393                    | -345.435802                    | -345.435169                    | 7.69                    | 14.56                   | 22.71                   |
| +0.0030 | -345.433007       | -345.430320       | -345.425893       | -345.435406                    | -345.435866                    | -345.435163                    | 6.30                    | 14.56                   | 24.34                   |

**Table S160. Energy of A12 and <sup>3</sup>A12 Under EEFs in Gas.** Energy given in Hartree, changes in energy given in kJ/mol.

| Field   | Energy A12, X-EEF | Energy A12, Y-EEF | Energy A12, Z-EEF | Energy <sup>3</sup> A12, X-EEF | Energy <sup>3</sup> A12, Y-EEF | Energy <sup>3</sup> A12, Z-EEF | $\Delta E_{ST}$ , X-EEF | $\Delta E_{ST}$ , Y-EEF | $\Delta E_{ST}$ , Z-EEF |
|---------|-------------------|-------------------|-------------------|--------------------------------|--------------------------------|--------------------------------|-------------------------|-------------------------|-------------------------|
| -0.0030 | -325.557123       | -325.562247       | -325.569432       | -325.563014                    | -325.565368                    | -325.566888                    | 15.47                   | 8.19                    | -6.68                   |
| -0.0025 | -325.557879       | -325.562182       | -325.568112       | -325.563129                    | -325.565117                    | -325.566328                    | 13.78                   | 7.71                    | -4.68                   |
| -0.0020 | -325.558661       | -325.562129       | -325.566828       | -325.563267                    | -325.564879                    | -325.565803                    | 12.09                   | 7.22                    | -2.69                   |
| -0.0015 | -325.559469       | -325.562090       | -325.565579       | -325.563428                    | -325.564654                    | -325.565313                    | 10.40                   | 6.73                    | -0.70                   |
| -0.0010 | -325.560302       | -325.562062       | -325.564366       | -325.563613                    | -325.564440                    | -325.564857                    | 8.69                    | 6.24                    | 1.29                    |
| -0.0005 | -325.561161       | -325.562047       | -325.563188       | -325.563820                    | -325.564239                    | -325.564437                    | 6.98                    | 5.76                    | 3.28                    |
| +0.0000 | -325.562045       | -325.562045       | -325.562045       | -325.564051                    | -325.564051                    | -325.564051                    | 5.27                    | 5.27                    | 5.27                    |
| +0.0005 | -325.562955       | -325.562055       | -325.560938       | -325.564305                    | -325.563875                    | -325.563699                    | 3.54                    | 4.78                    | 7.25                    |
| +0.0010 | -325.563891       | -325.562078       | -325.559865       | -325.564582                    | -325.563711                    | -325.563382                    | 1.81                    | 4.29                    | 9.23                    |
| +0.0015 | -325.564853       | -325.562113       | -325.558827       | -325.564882                    | -325.563560                    | -325.563099                    | 0.08                    | 3.80                    | 11.22                   |
| +0.0020 | -325.565840       | -325.562161       | -325.557824       | -325.565205                    | -325.563421                    | -325.562851                    | -1.67                   | 3.31                    | 13.20                   |
| +0.0025 | -325.566853       | -325.562222       | -325.556856       | -325.565552                    | -325.563294                    | -325.562636                    | -3.42                   | 2.82                    | 15.18                   |
| +0.0030 | -325.567892       | -325.562295       | -325.555922       | -325.565922                    | -325.563180                    | -325.562455                    | -5.17                   | 2.33                    | 17.15                   |

**Table S161. Energy of A13 and <sup>3</sup>A13 Under EEFs in Gas.** Energy given in Hartree, changes in energy given in kJ/mol.

| Field   | Energy A13, X-EEF | Energy A13, Y-EEF | Energy A13, Z-EEF | Energy <sup>3</sup> A13, X-EEF | Energy <sup>3</sup> A13, Y-EEF | Energy <sup>3</sup> A13, Z-EEF | $\Delta E_{ST}$ , X-EEF | $\Delta E_{ST}$ , Y-EEF | $\Delta E_{ST}$ , Z-EEF |
|---------|-------------------|-------------------|-------------------|--------------------------------|--------------------------------|--------------------------------|-------------------------|-------------------------|-------------------------|
| -0.0030 | -668.380894       | -668.383377       | -668.387706       | -668.391409                    | -668.392626                    | -668.392331                    | 27.61                   | 24.28                   | 12.14                   |
| -0.0025 | -668.381197       | -668.383300       | -668.386841       | -668.391504                    | -668.392547                    | -668.392236                    | 27.06                   | 24.28                   | 14.16                   |
| -0.0020 | -668.381527       | -668.383238       | -668.386017       | -668.391624                    | -668.392482                    | -668.392180                    | 26.51                   | 24.27                   | 16.18                   |
| -0.0015 | -668.381885       | -668.383189       | -668.385234       | -668.391770                    | -668.392431                    | -668.392165                    | 25.95                   | 24.26                   | 18.20                   |
| -0.0010 | -668.382271       | -668.383154       | -668.384491       | -668.391940                    | -668.392393                    | -668.392189                    | 25.39                   | 24.26                   | 20.21                   |
| -0.0005 | -668.382685       | -668.383133       | -668.383789       | -668.392136                    | -668.392368                    | -668.392253                    | 24.82                   | 24.25                   | 22.22                   |
| +0.0000 | -668.383126       | -668.383126       | -668.383126       | -668.392358                    | -668.392358                    | -668.392358                    | 24.24                   | 24.24                   | 24.24                   |
| +0.0005 | -668.383595       | -668.383133       | -668.382504       | -668.392604                    | -668.392360                    | -668.392501                    | 23.65                   | 24.23                   | 26.25                   |
| +0.0010 | -668.384093       | -668.383154       | -668.381921       | -668.392875                    | -668.392377                    | -668.392684                    | 23.06                   | 24.22                   | 28.26                   |
| +0.0015 | -668.384618       | -668.383188       | -668.381378       | -668.393172                    | -668.392407                    | -668.392906                    | 22.46                   | 24.20                   | 30.27                   |
| +0.0020 | -668.385171       | -668.383237       | -668.380874       | -668.393494                    | -668.392451                    | -668.393168                    | 21.85                   | 24.19                   | 32.28                   |
| +0.0025 | -668.385752       | -668.383299       | -668.380410       | -668.393841                    | -668.392508                    | -668.393469                    | 21.24                   | 24.18                   | 34.29                   |
| +0.0030 | -668.386361       | -668.383375       | -668.379985       | -668.394214                    | -668.392579                    | -668.393808                    | 20.62                   | 24.16                   | 36.29                   |

**Table S162. Energy of A14 and <sup>3</sup>A14 Under EEFs in Gas.** Energy given in Hartree, changes in energy given in kJ/mol.

| Field   | Energy A14, X-EEF | Energy A14, Y-EEF | Energy A14, Z-EEF | Energy <sup>3</sup> A14, X-EEF | Energy <sup>3</sup> A14, Y-EEF | Energy <sup>3</sup> A14, Z-EEF | $\Delta E_{ST}$ , X-EEF | $\Delta E_{ST}$ , Y-EEF | $\Delta E_{ST}$ , Z-EEF |
|---------|-------------------|-------------------|-------------------|--------------------------------|--------------------------------|--------------------------------|-------------------------|-------------------------|-------------------------|
| -0.0030 | -474.700432       | -474.701017       | -474.699637       | -474.722205                    | -474.720601                    | -474.715286                    | 57.16                   | 51.42                   | 41.09                   |
| -0.0025 | -474.700424       | -474.700948       | -474.699745       | -474.721837                    | -474.720534                    | -474.716043                    | 56.22                   | 51.42                   | 42.79                   |
| -0.0020 | -474.700442       | -474.700891       | -474.699886       | -474.721495                    | -474.720479                    | -474.716837                    | 55.27                   | 51.43                   | 44.50                   |
| -0.0015 | -474.700488       | -474.700846       | -474.700062       | -474.721178                    | -474.720436                    | -474.717668                    | 54.32                   | 51.43                   | 46.23                   |
| -0.0010 | -474.700561       | -474.700814       | -474.700271       | -474.720887                    | -474.720406                    | -474.718536                    | 53.37                   | 51.44                   | 47.95                   |
| -0.0005 | -474.700661       | -474.700795       | -474.700513       | -474.720621                    | -474.720387                    | -474.719440                    | 52.40                   | 51.44                   | 49.69                   |
| +0.0000 | -474.700789       | -474.700789       | -474.700789       | -474.720381                    | -474.720381                    | -474.720381                    | 51.44                   | 51.44                   | 51.44                   |
| +0.0005 | -474.700944       | -474.700795       | -474.701098       | -474.720167                    | -474.720387                    | -474.721360                    | 50.47                   | 51.44                   | 53.20                   |
| +0.0010 | -474.701126       | -474.700814       | -474.701441       | -474.719979                    | -474.720406                    | -474.722375                    | 49.50                   | 51.44                   | 54.96                   |
| +0.0015 | -474.701336       | -474.700846       | -474.701817       | -474.719816                    | -474.720437                    | -474.723428                    | 48.52                   | 51.44                   | 56.74                   |
| +0.0020 | -474.701573       | -474.700890       | -474.702226       | -474.719678                    | -474.720480                    | -474.724518                    | 47.54                   | 51.43                   | 58.53                   |
| +0.0025 | -474.701837       | -474.700947       | -474.702669       | -474.719567                    | -474.720535                    | -474.725646                    | 46.55                   | 51.43                   | 60.33                   |
| +0.0030 | -474.702129       | -474.701016       | -474.703144       | -474.719481                    | -474.720602                    | -474.726812                    | 45.56                   | 51.42                   | 62.14                   |

**Table S163. Energy of A15 and <sup>3</sup>A15 Under EEFs in Gas.** Energy given in Hartree, changes in energy given in kJ/mol.

| Field   | Energy A15, X-EEF | Energy A15, Y-EEF | Energy A15, Z-EEF | Energy <sup>3</sup> A15, X-EEF | Energy <sup>3</sup> A15, Y-EEF | Energy <sup>3</sup> A15, Z-EEF | $\Delta E_{ST, X-EEF}$ | $\Delta E_{ST, Y-EEF}$ | $\Delta E_{ST, Z-EEF}$ |
|---------|-------------------|-------------------|-------------------|--------------------------------|--------------------------------|--------------------------------|------------------------|------------------------|------------------------|
| -0.0030 | -384.721365       | -384.724044       | -384.730060       | -384.729897                    | -384.729469                    | -384.731478                    | 22.40                  | 14.24                  | 3.72                   |
| -0.0025 | -384.721704       | -384.723965       | -384.728920       | -384.729723                    | -384.729390                    | -384.731007                    | 21.05                  | 14.25                  | 5.48                   |
| -0.0020 | -384.722069       | -384.723900       | -384.727817       | -384.729574                    | -384.729327                    | -384.730574                    | 19.70                  | 14.25                  | 7.24                   |
| -0.0015 | -384.722459       | -384.723849       | -384.726752       | -384.729448                    | -384.729277                    | -384.730178                    | 18.35                  | 14.25                  | 8.99                   |
| -0.0010 | -384.722875       | -384.723813       | -384.725725       | -384.729346                    | -384.729241                    | -384.729819                    | 16.99                  | 14.25                  | 10.75                  |
| -0.0005 | -384.723317       | -384.723792       | -384.724736       | -384.729267                    | -384.729220                    | -384.729497                    | 15.62                  | 14.25                  | 12.50                  |
| +0.0000 | -384.723784       | -384.723784       | -384.723784       | -384.729213                    | -384.729213                    | -384.729213                    | 14.25                  | 14.25                  | 14.25                  |
| +0.0005 | -384.724277       | -384.723791       | -384.722870       | -384.729181                    | -384.729219                    | -384.728965                    | 12.88                  | 14.25                  | 16.00                  |
| +0.0010 | -384.724796       | -384.723813       | -384.721994       | -384.729174                    | -384.729241                    | -384.728754                    | 11.50                  | 14.25                  | 17.75                  |
| +0.0015 | -384.725340       | -384.723849       | -384.721155       | -384.729190                    | -384.729276                    | -384.728580                    | 10.11                  | 14.25                  | 19.49                  |
| +0.0020 | -384.725909       | -384.723899       | -384.720353       | -384.729230                    | -384.729325                    | -384.728442                    | 8.72                   | 14.25                  | 21.24                  |
| +0.0025 | -384.726505       | -384.723964       | -384.719588       | -384.729294                    | -384.729389                    | -384.728341                    | 7.32                   | 14.24                  | 22.98                  |
| +0.0030 | -384.727126       | -384.724043       | -384.718860       | -384.729381                    | -384.729467                    | -384.728277                    | 5.92                   | 14.24                  | 24.72                  |

**Table S164. Energy of A16 and <sup>3</sup>A16 Under EEFs in Gas.** Energy given in Hartree, changes in energy given in kJ/mol.

| Field   | Energy A16, X-EEF | Energy A16, Y-EEF | Energy A16, Z-EEF | Energy <sup>3</sup> A16, X-EEF | Energy <sup>3</sup> A16, Y-EEF | Energy <sup>3</sup> A16, Z-EEF | $\Delta E_{ST, X-EEF}$ | $\Delta E_{ST, Y-EEF}$ | $\Delta E_{ST, Z-EEF}$ |
|---------|-------------------|-------------------|-------------------|--------------------------------|--------------------------------|--------------------------------|------------------------|------------------------|------------------------|
| -0.0030 | -345.421649       | -345.423545       | -345.426177       | -345.436561                    | -345.435987                    | -345.435403                    | 39.15                  | 32.66                  | 24.22                  |
| -0.0025 | -345.421869       | -345.423480       | -345.425630       | -345.436373                    | -345.435922                    | -345.435393                    | 38.08                  | 32.67                  | 25.63                  |
| -0.0020 | -345.422113       | -345.423427       | -345.425113       | -345.436208                    | -345.435870                    | -345.435412                    | 37.01                  | 32.67                  | 27.04                  |
| -0.0015 | -345.422381       | -345.423385       | -345.424624       | -345.436066                    | -345.435829                    | -345.435459                    | 35.93                  | 32.67                  | 28.45                  |
| -0.0010 | -345.422674       | -345.423356       | -345.424165       | -345.435946                    | -345.435800                    | -345.435536                    | 34.85                  | 32.67                  | 29.86                  |
| -0.0005 | -345.422990       | -345.423338       | -345.423734       | -345.435849                    | -345.435782                    | -345.435641                    | 33.76                  | 32.67                  | 31.26                  |
| +0.0000 | -345.423332       | -345.423332       | -345.423332       | -345.435776                    | -345.435776                    | -345.435776                    | 32.67                  | 32.67                  | 32.67                  |
| +0.0005 | -345.423697       | -345.423338       | -345.422958       | -345.435724                    | -345.435781                    | -345.435938                    | 31.58                  | 32.67                  | 34.08                  |
| +0.0010 | -345.424087       | -345.423355       | -345.422614       | -345.435696                    | -345.435798                    | -345.436130                    | 30.48                  | 32.67                  | 35.49                  |
| +0.0015 | -345.424501       | -345.423385       | -345.422297       | -345.435690                    | -345.435826                    | -345.436351                    | 29.38                  | 32.67                  | 36.90                  |
| +0.0020 | -345.424940       | -345.423426       | -345.422010       | -345.435708                    | -345.435866                    | -345.436600                    | 28.27                  | 32.66                  | 38.31                  |
| +0.0025 | -345.425403       | -345.423479       | -345.421751       | -345.435748                    | -345.435918                    | -345.436878                    | 27.16                  | 32.66                  | 39.72                  |
| +0.0030 | -345.425890       | -345.423544       | -345.421520       | -345.435811                    | -345.435981                    | -345.437184                    | 26.05                  | 32.65                  | 41.13                  |

**Table S165. Energy of A17 and <sup>3</sup>A17 Under EEFs in Gas.** Energy given in Hartree, changes in energy given in kJ/mol.

| Field   | Energy A17, X-EEF | Energy A17, Y-EEF | Energy A17, Z-EEF | Energy <sup>3</sup> A17, X-EEF | Energy <sup>3</sup> A17, Y-EEF | Energy <sup>3</sup> A17, Z-EEF | $\Delta E_{ST, X-EEF}$ | $\Delta E_{ST, Y-EEF}$ | $\Delta E_{ST, Z-EEF}$ |
|---------|-------------------|-------------------|-------------------|--------------------------------|--------------------------------|--------------------------------|------------------------|------------------------|------------------------|
| -0.0030 | -325.548912       | -325.550129       | -325.556096       | -325.563779                    | -325.562307                    | -325.565085                    | 39.04                  | 31.97                  | 23.60                  |
| -0.0025 | -325.549198       | -325.550245       | -325.555170       | -325.563628                    | -325.562429                    | -325.564697                    | 37.88                  | 31.99                  | 25.02                  |
| -0.0020 | -325.549510       | -325.550373       | -325.554275       | -325.563500                    | -325.562565                    | -325.564341                    | 36.73                  | 32.01                  | 26.43                  |
| -0.0015 | -325.549848       | -325.550514       | -325.553412       | -325.563397                    | -325.562712                    | -325.564017                    | 35.57                  | 32.03                  | 27.84                  |
| -0.0010 | -325.550211       | -325.550667       | -325.552581       | -325.563317                    | -325.562872                    | -325.563723                    | 34.41                  | 32.04                  | 29.25                  |
| -0.0005 | -325.550599       | -325.550833       | -325.551781       | -325.563261                    | -325.563045                    | -325.563461                    | 33.25                  | 32.06                  | 30.67                  |
| +0.0000 | -325.551012       | -325.551012       | -325.551012       | -325.563230                    | -325.563230                    | -325.563230                    | 32.08                  | 32.08                  | 32.08                  |
| +0.0005 | -325.551451       | -325.551204       | -325.550275       | -325.563222                    | -325.563427                    | -325.563030                    | 30.90                  | 32.09                  | 33.49                  |
| +0.0010 | -325.551915       | -325.551408       | -325.549569       | -325.563239                    | -325.563637                    | -325.562861                    | 29.73                  | 32.11                  | 34.90                  |
| +0.0015 | -325.552405       | -325.551625       | -325.548894       | -325.563279                    | -325.563859                    | -325.562723                    | 28.55                  | 32.12                  | 36.31                  |
| +0.0020 | -325.552920       | -325.551854       | -325.548250       | -325.563343                    | -325.564093                    | -325.562616                    | 27.37                  | 32.13                  | 37.72                  |
| +0.0025 | -325.553460       | -325.552096       | -325.547637       | -325.563432                    | -325.564340                    | -325.562540                    | 26.18                  | 32.15                  | 39.13                  |
| +0.0030 | -325.554026       | -325.552351       | -325.547055       | -325.563544                    | -325.564599                    | -325.562496                    | 24.99                  | 32.16                  | 40.54                  |

**Table S166. Energy of A18 and <sup>3</sup>A18 Under EEFs in Gas.** Energy given in Hartree, changes in energy given in kJ/mol.

| Field   | Energy A18, X-EEF | Energy A18, Y-EEF | Energy A18, Z-EEF | Energy <sup>3</sup> A18, X-EEF | Energy <sup>3</sup> A18, Y-EEF | Energy <sup>3</sup> A18, Z-EEF | $\Delta E_{ST, X-EEF}$ | $\Delta E_{ST, Y-EEF}$ | $\Delta E_{ST, Z-EEF}$ |
|---------|-------------------|-------------------|-------------------|--------------------------------|--------------------------------|--------------------------------|------------------------|------------------------|------------------------|
| -0.0030 | -668.375988       | -668.378638       | -668.381059       | -668.389741                    | -668.391611                    | -668.391899                    | 36.11                  | 34.06                  | 28.46                  |
| -0.0025 | -668.376328       | -668.378570       | -668.380533       | -668.389934                    | -668.391524                    | -668.391710                    | 35.72                  | 34.01                  | 29.35                  |
| -0.0020 | -668.376696       | -668.378517       | -668.380043       | -668.390154                    | -668.391452                    | -668.391557                    | 35.33                  | 33.96                  | 30.23                  |
| -0.0015 | -668.377091       | -668.378477       | -668.379589       | -668.390400                    | -668.391393                    | -668.391439                    | 34.94                  | 33.91                  | 31.11                  |
| -0.0010 | -668.377513       | -668.378451       | -668.379171       | -668.390673                    | -668.391347                    | -668.391357                    | 34.55                  | 33.86                  | 31.99                  |
| -0.0005 | -668.377963       | -668.378439       | -668.378788       | -668.390972                    | -668.391315                    | -668.391309                    | 34.15                  | 33.81                  | 32.87                  |
| +0.0000 | -668.378441       | -668.378441       | -668.378441       | -668.391297                    | -668.391297                    | -668.391297                    | 33.75                  | 33.75                  | 33.75                  |
| +0.0005 | -668.378946       | -668.378457       | -668.378129       | -668.391649                    | -668.391293                    | -668.391320                    | 33.35                  | 33.70                  | 34.63                  |
| +0.0010 | -668.379479       | -668.378486       | -668.377852       | -668.392028                    | -668.391302                    | -668.391379                    | 32.95                  | 33.65                  | 35.51                  |
| +0.0015 | -668.380039       | -668.378530       | -668.377611       | -668.392433                    | -668.391324                    | -668.391472                    | 32.54                  | 33.59                  | 36.39                  |
| +0.0020 | -668.380627       | -668.378587       | -668.377405       | -668.392864                    | -668.391361                    | -668.391601                    | 32.13                  | 33.54                  | 37.27                  |
| +0.0025 | -668.381242       | -668.378659       | -668.377234       | -668.393322                    | -668.391411                    | -668.391764                    | 31.72                  | 33.48                  | 38.15                  |
| +0.0030 | -668.381885       | -668.378744       | -668.377098       | -668.393806                    | -668.391474                    | -668.391963                    | 31.30                  | 33.42                  | 39.03                  |



**Table S167. Energy of A19 and <sup>3</sup>A19 Under EEFs in Gas.** Energy given in Hartree, changes in energy given in kJ/mol.

| Field   | Energy A19, X-EEF | Energy A19, Y-EEF | Energy A19, Z-EEF | Energy <sup>3</sup> A19, X-EEF | Energy <sup>3</sup> A19, Y-EEF | Energy <sup>3</sup> A19, Z-EEF | $\Delta E_{ST, X-EEF}$ | $\Delta E_{ST, Y-EEF}$ | $\Delta E_{ST, Z-EEF}$ |
|---------|-------------------|-------------------|-------------------|--------------------------------|--------------------------------|--------------------------------|------------------------|------------------------|------------------------|
| -0.0030 | -474.696778       | -474.702498       | -474.701204       | -474.714438                    | -474.718299                    | -474.714406                    | 46.37                  | 41.49                  | 34.66                  |
| -0.0025 | -474.697626       | -474.702429       | -474.701299       | -474.714979                    | -474.718232                    | -474.714935                    | 45.56                  | 41.49                  | 35.80                  |
| -0.0020 | -474.698501       | -474.702372       | -474.701427       | -474.715547                    | -474.718177                    | -474.715498                    | 44.75                  | 41.50                  | 36.94                  |
| -0.0015 | -474.699403       | -474.702328       | -474.701588       | -474.716141                    | -474.718134                    | -474.716093                    | 43.95                  | 41.50                  | 38.08                  |
| -0.0010 | -474.700332       | -474.702296       | -474.701782       | -474.716761                    | -474.718104                    | -474.716722                    | 43.13                  | 41.50                  | 39.22                  |
| -0.0005 | -474.701288       | -474.702277       | -474.702010       | -474.717407                    | -474.718085                    | -474.717384                    | 42.32                  | 41.50                  | 40.37                  |
| +0.0000 | -474.702271       | -474.702271       | -474.702271       | -474.718079                    | -474.718079                    | -474.718079                    | 41.51                  | 41.51                  | 41.51                  |
| +0.0005 | -474.703280       | -474.702277       | -474.702565       | -474.718777                    | -474.718086                    | -474.718808                    | 40.69                  | 41.51                  | 42.65                  |
| +0.0010 | -474.704317       | -474.702296       | -474.702892       | -474.719502                    | -474.718104                    | -474.719569                    | 39.87                  | 41.51                  | 43.79                  |
| +0.0015 | -474.705380       | -474.702327       | -474.703252       | -474.720252                    | -474.718135                    | -474.720364                    | 39.05                  | 41.50                  | 44.93                  |
| +0.0020 | -474.706470       | -474.702371       | -474.703645       | -474.721028                    | -474.718178                    | -474.721191                    | 38.22                  | 41.50                  | 46.07                  |
| +0.0025 | -474.707587       | -474.702428       | -474.704072       | -474.721831                    | -474.718234                    | -474.722052                    | 37.40                  | 41.50                  | 47.21                  |
| +0.0030 | -474.708730       | -474.702497       | -474.704531       | -474.722659                    | -474.718301                    | -474.722946                    | 36.57                  | 41.49                  | 48.35                  |

**Table S168. Energy of A20 and <sup>3</sup>A20 Under EEFs in Gas.** Energy given in Hartree, changes in energy given in kJ/mol.

| Field   | Energy A20, X-EEF | Energy A20, Y-EEF | Energy A20, Z-EEF | Energy <sup>3</sup> A20, X-EEF | Energy <sup>3</sup> A20, Y-EEF | Energy <sup>3</sup> A20, Z-EEF | $\Delta E_{ST, X-EEF}$ | $\Delta E_{ST, Y-EEF}$ | $\Delta E_{ST, Z-EEF}$ |
|---------|-------------------|-------------------|-------------------|--------------------------------|--------------------------------|--------------------------------|------------------------|------------------------|------------------------|
| -0.0030 | -384.715863       | -384.717516       | -384.720816       | -384.730450                    | -384.729581                    | -384.729616                    | 38.30                  | 31.68                  | 23.10                  |
| -0.0025 | -384.716025       | -384.717436       | -384.720141       | -384.730196                    | -384.729504                    | -384.729489                    | 37.21                  | 31.68                  | 24.54                  |
| -0.0020 | -384.716215       | -384.717371       | -384.719499       | -384.729969                    | -384.729440                    | -384.729393                    | 36.11                  | 31.69                  | 25.98                  |
| -0.0015 | -384.716432       | -384.717320       | -384.718889       | -384.729769                    | -384.729391                    | -384.729329                    | 35.01                  | 31.69                  | 27.41                  |
| -0.0010 | -384.716678       | -384.717283       | -384.718311       | -384.729595                    | -384.729357                    | -384.729297                    | 33.91                  | 31.70                  | 28.84                  |
| -0.0005 | -384.716951       | -384.717261       | -384.717766       | -384.729449                    | -384.729336                    | -384.729298                    | 32.81                  | 31.70                  | 30.28                  |
| +0.0000 | -384.717253       | -384.717253       | -384.717253       | -384.729330                    | -384.729330                    | -384.729330                    | 31.71                  | 31.71                  | 31.71                  |
| +0.0005 | -384.717583       | -384.717260       | -384.716772       | -384.729237                    | -384.729337                    | -384.729393                    | 30.60                  | 31.71                  | 33.14                  |
| +0.0010 | -384.717940       | -384.717281       | -384.716324       | -384.729172                    | -384.729359                    | -384.729489                    | 29.49                  | 31.71                  | 34.57                  |
| +0.0015 | -384.718326       | -384.717316       | -384.715907       | -384.729133                    | -384.729395                    | -384.729616                    | 28.37                  | 31.71                  | 35.99                  |
| +0.0020 | -384.718740       | -384.717366       | -384.715523       | -384.729122                    | -384.729445                    | -384.729776                    | 27.26                  | 31.72                  | 37.42                  |
| +0.0025 | -384.719182       | -384.717430       | -384.715170       | -384.729137                    | -384.729510                    | -384.729966                    | 26.14                  | 31.72                  | 38.85                  |
| +0.0030 | -384.719651       | -384.717508       | -384.714850       | -384.729179                    | -384.729588                    | -384.730189                    | 25.02                  | 31.72                  | 40.27                  |

**Table S169. Energy of A21 and <sup>3</sup>A21 Under EEFs in Gas.** Energy given in Hartree, changes in energy given in kJ/mol.

| Field   | Energy A21, X-EEF | Energy A21, Y-EEF | Energy A21, Z-EEF | Energy <sup>3</sup> A21, X-EEF | Energy <sup>3</sup> A21, Y-EEF | Energy <sup>3</sup> A21, Z-EEF | $\Delta E_{ST}$ , X-EEF | $\Delta E_{ST}$ , Y-EEF | $\Delta E_{ST}$ , Z-EEF |
|---------|-------------------|-------------------|-------------------|--------------------------------|--------------------------------|--------------------------------|-------------------------|-------------------------|-------------------------|
| -0.0030 | -721.819741       | -721.821838       | -721.813228       | -721.824420                    | -721.823633                    | -721.818560                    | 12.28                   | 4.71                    | 14.00                   |
| -0.0025 | -721.819971       | -721.821744       | -721.814502       | -721.824173                    | -721.823541                    | -721.819248                    | 11.03                   | 4.72                    | 12.46                   |
| -0.0020 | -721.820228       | -721.821668       | -721.815820       | -721.823952                    | -721.823465                    | -721.819979                    | 9.78                    | 4.72                    | 10.92                   |
| -0.0015 | -721.820512       | -721.821608       | -721.817181       | -721.823757                    | -721.823406                    | -721.820753                    | 8.52                    | 4.72                    | 9.38                    |
| -0.0010 | -721.820825       | -721.821566       | -721.818587       | -721.823588                    | -721.823364                    | -721.821569                    | 7.26                    | 4.72                    | 7.83                    |
| -0.0005 | -721.821164       | -721.821540       | -721.820037       | -721.823446                    | -721.823339                    | -721.822428                    | 5.99                    | 4.72                    | 6.28                    |
| +0.0000 | -721.821532       | -721.821532       | -721.821532       | -721.823330                    | -721.823330                    | -721.823330                    | 4.72                    | 4.72                    | 4.72                    |
| +0.0005 | -721.821926       | -721.821540       | -721.823070       | -721.823240                    | -721.823339                    | -721.824275                    | 3.45                    | 4.72                    | 3.16                    |
| +0.0010 | -721.822349       | -721.821566       | -721.824654       | -721.823177                    | -721.823364                    | -721.825264                    | 2.17                    | 4.72                    | 1.60                    |
| +0.0015 | -721.822799       | -721.821608       | -721.826281       | -721.823140                    | -721.823406                    | -721.826296                    | 0.90                    | 4.72                    | 0.04                    |
| +0.0020 | -721.823276       | -721.821668       | -721.827954       | -721.823129                    | -721.823465                    | -721.827371                    | -0.39                   | 4.72                    | -1.53                   |
| +0.0025 | -721.823781       | -721.821744       | -721.829671       | -721.823145                    | -721.823541                    | -721.828490                    | -1.67                   | 4.72                    | -3.10                   |
| +0.0030 | -721.824314       | -721.821838       | -721.831434       | -721.823186                    | -721.823633                    | -721.829653                    | -2.96                   | 4.71                    | -4.67                   |

**Table S170. Energy of A22 and <sup>3</sup>A22 Under EEFs in Gas.** Energy given in Hartree, changes in energy given in kJ/mol.

| Field   | Energy A22, X-EEF | Energy A22, Y-EEF | Energy A22, Z-EEF | Energy <sup>3</sup> A22, X-EEF | Energy <sup>3</sup> A22, Y-EEF | Energy <sup>3</sup> A22, Z-EEF | $\Delta E_{ST}$ , X-EEF | $\Delta E_{ST}$ , Y-EEF | $\Delta E_{ST}$ , Z-EEF |
|---------|-------------------|-------------------|-------------------|--------------------------------|--------------------------------|--------------------------------|-------------------------|-------------------------|-------------------------|
| -0.0030 | -721.807502       | -721.810669       | -721.803586       | -721.820654                    | -721.821491                    | -721.816889                    | 34.53                   | 28.41                   | 34.93                   |
| -0.0025 | -721.807909       | -721.810575       | -721.804614       | -721.820676                    | -721.821399                    | -721.817505                    | 33.52                   | 28.42                   | 33.85                   |
| -0.0020 | -721.808344       | -721.810498       | -721.805683       | -721.820725                    | -721.821323                    | -721.818162                    | 32.51                   | 28.42                   | 32.76                   |
| -0.0015 | -721.808807       | -721.810439       | -721.806792       | -721.820800                    | -721.821264                    | -721.818859                    | 31.49                   | 28.42                   | 31.68                   |
| -0.0010 | -721.809297       | -721.810396       | -721.807941       | -721.820903                    | -721.821222                    | -721.819595                    | 30.47                   | 28.42                   | 30.60                   |
| -0.0005 | -721.809816       | -721.810370       | -721.809131       | -721.821032                    | -721.821197                    | -721.820372                    | 29.45                   | 28.42                   | 29.51                   |
| +0.0000 | -721.810362       | -721.810362       | -721.810362       | -721.821188                    | -721.821188                    | -721.821188                    | 28.43                   | 28.43                   | 28.43                   |
| +0.0005 | -721.810936       | -721.810370       | -721.811633       | -721.821371                    | -721.821197                    | -721.822045                    | 27.40                   | 28.42                   | 27.34                   |
| +0.0010 | -721.811538       | -721.810396       | -721.812945       | -721.821581                    | -721.821222                    | -721.822942                    | 26.37                   | 28.42                   | 26.25                   |
| +0.0015 | -721.812167       | -721.810439       | -721.814298       | -721.821817                    | -721.821264                    | -721.823879                    | 25.34                   | 28.42                   | 25.15                   |
| +0.0020 | -721.812825       | -721.810498       | -721.815691       | -721.822081                    | -721.821323                    | -721.824856                    | 24.30                   | 28.42                   | 24.06                   |
| +0.0025 | -721.813510       | -721.810575       | -721.817126       | -721.822371                    | -721.821399                    | -721.825874                    | 23.26                   | 28.42                   | 22.97                   |
| +0.0030 | -721.814223       | -721.810669       | -721.818601       | -721.822688                    | -721.821491                    | -721.826931                    | 22.22                   | 28.41                   | 21.87                   |

## S9. Natural Resonance Theory Calculation Results

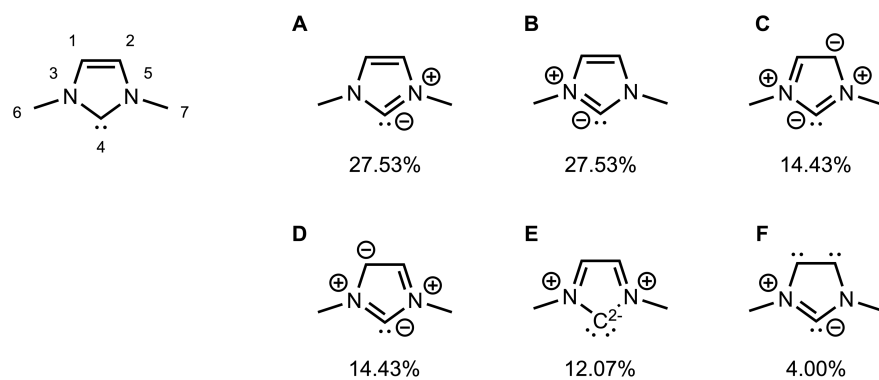

**Figure S139.** The NRT results for  $I_{1a}$ , demonstrating that in the Natural Bonding Orbital basis, the carbenic structure is ylidic, and not formally carbenic, in the gas phase.

## S10. Gibbs Free Energies and Components, Frontier Orbital Energies, Nucleophilicity and Electrophilicity Parameters of Unsubstituted NHCs in Test Set Across Different Solvents

**Table S171. Reference Species.** Entropy given in J/mol.K and frontier orbital energy given in eV. All other quantities given in Hartree.

| Species                 | DFT Energy  | ZPVE     | TC       | S          | TS       | H           | G           | E(HOMO) |
|-------------------------|-------------|----------|----------|------------|----------|-------------|-------------|---------|
| TCE, Gas                | -447.521116 | 0.047645 | 0.010036 | 394.029200 | 0.044746 | -447.463434 | -447.508180 | -10.923 |
| TCE, TOL <sup>a</sup>   | -447.524835 | 0.047476 | 0.010157 | 396.712900 | 0.045050 | -447.467202 | -447.509233 | -10.640 |
| TCE, DCM <sup>a</sup>   | -447.532845 | 0.047581 | 0.010133 | 396.356700 | 0.045010 | -447.475130 | -447.517121 | -10.407 |
| TCE, MeCN <sup>a</sup>  | -447.534565 | 0.047652 | 0.010109 | 395.968900 | 0.044966 | -447.476803 | -447.518750 | -10.321 |
| TCE, Water <sup>a</sup> | -447.527489 | 0.047403 | 0.010098 | 395.664100 | 0.044931 | -447.469988 | -447.511900 | -10.294 |

<sup>a</sup> The Gibbs free energies for these species are phase-corrected via the Direct method to account for solvation

**Table S172. Unsubstituted NHCs in Test Set in Gas.** Entropy given in J/mol.K. All other quantities given in Hartree.

| Species                         | DFT Energy  | ZPVE     | TC       | S          | TS       | H           | G           |
|---------------------------------|-------------|----------|----------|------------|----------|-------------|-------------|
| I <sub>1a</sub>                 | -304.777248 | 0.127783 | 0.007878 | 341.729700 | 0.038807 | -304.641587 | -304.680394 |
| <sup>3</sup> I <sub>1a</sub>    | -304.640405 | 0.125222 | 0.008220 | 354.795100 | 0.040290 | -304.506962 | -304.547253 |
| II <sub>1a</sub>                | -383.326623 | 0.182763 | 0.011173 | 404.772100 | 0.045966 | -383.132687 | -383.178652 |
| <sup>3</sup> II <sub>1a</sub>   | -383.258939 | 0.180579 | 0.011164 | 405.032300 | 0.045995 | -383.067197 | -383.113192 |
| III <sub>1a</sub>               | -344.060072 | 0.155410 | 0.009548 | 374.889500 | 0.042572 | -343.895114 | -343.937686 |
| <sup>3</sup> III <sub>1a</sub>  | -343.957724 | 0.152556 | 0.009969 | 389.966400 | 0.044284 | -343.795199 | -343.839483 |
| IV <sub>1a</sub>                | -285.327785 | 0.086895 | 0.006065 | 303.317400 | 0.034444 | -285.234825 | -285.269270 |
| <sup>3</sup> IV <sub>1a</sub>   | -285.201048 | 0.084569 | 0.006585 | 322.646500 | 0.036639 | -285.109894 | -285.146534 |
| V <sub>1a</sub>                 | -608.304080 | 0.083758 | 0.006444 | 314.938500 | 0.035764 | -608.213878 | -608.249642 |
| <sup>3</sup> V <sub>1a</sub>    | -608.196307 | 0.081862 | 0.007069 | 336.380300 | 0.038199 | -608.107376 | -608.145575 |
| VI <sub>1a</sub>                | -305.973317 | 0.150582 | 0.008534 | 347.482700 | 0.039460 | -305.814201 | -305.853661 |
| <sup>3</sup> VI <sub>1a</sub>   | -305.859700 | 0.149471 | 0.008326 | 356.266200 | 0.040457 | -305.701903 | -305.742360 |
| VII <sub>1a</sub>               | -345.281574 | 0.180342 | 0.009263 | 367.321600 | 0.041713 | -345.091970 | -345.133682 |
| <sup>3</sup> VII <sub>1a</sub>  | -345.184027 | 0.179025 | 0.009146 | 372.390100 | 0.042288 | -344.995856 | -345.038145 |
| VIII <sub>1a</sub>              | -327.997986 | 0.165895 | 0.009336 | 365.808900 | 0.041541 | -327.822755 | -327.864296 |
| <sup>3</sup> VIII <sub>1a</sub> | -327.923282 | 0.164367 | 0.009707 | 382.781000 | 0.043468 | -327.749208 | -327.792676 |
| IX <sub>1a</sub>                | -320.817894 | 0.116342 | 0.007686 | 338.829800 | 0.038477 | -320.693866 | -320.732343 |
| <sup>3</sup> IX <sub>1a</sub>   | -320.678717 | 0.113727 | 0.008069 | 353.652400 | 0.040160 | -320.556921 | -320.597081 |

**Table S173. Orbital Energies and Philicity Parameters of Unsubstituted NHCs in Test Set.** All quantities given in eV.

| Species                         | E(HOMO)   | E(LUMO)   | CHI      | ETA      | GEI      | N        |
|---------------------------------|-----------|-----------|----------|----------|----------|----------|
| I <sub>1a</sub>                 | -7.440410 | -0.163813 | 3.802111 | 7.276598 | 0.993325 | 3.483058 |
| <sup>3</sup> I <sub>1a</sub>    | -4.319808 | -2.359500 | 3.339654 | 1.960309 | 2.844779 | 6.603660 |
| II <sub>1a</sub>                | -5.875211 | -0.542867 | 3.209039 | 5.332344 | 0.965610 | 5.048257 |
| <sup>3</sup> II <sub>1a</sub>   | -4.239807 | -1.787516 | 3.013661 | 2.452290 | 1.851770 | 6.683662 |
| III <sub>1a</sub>               | -6.449372 | -0.398919 | 3.424145 | 6.050453 | 0.968917 | 4.474097 |
| <sup>3</sup> III <sub>1a</sub>  | -4.328788 | -1.837585 | 3.083187 | 2.491203 | 1.907922 | 6.594680 |
| IV <sub>1a</sub>                | -8.069266 | -0.279733 | 4.174499 | 7.789533 | 1.118581 | 2.854203 |
| <sup>3</sup> IV <sub>1a</sub>   | -5.130163 | -2.695832 | 3.912998 | 2.434331 | 3.144920 | 5.793305 |
| V <sub>1a</sub>                 | -7.775383 | -0.267488 | 4.021435 | 7.507895 | 1.076996 | 3.148086 |
| <sup>3</sup> V <sub>1a</sub>    | -4.708115 | -2.400045 | 3.554080 | 2.308070 | 2.736373 | 6.215354 |
| VI <sub>1a</sub>                | -7.227889 | -0.239188 | 3.733539 | 6.988701 | 0.997275 | 3.695579 |
| <sup>3</sup> VI <sub>1a</sub>   | -4.593555 | -2.236776 | 3.415166 | 2.356778 | 2.474428 | 6.329914 |
| VII <sub>1a</sub>               | -6.725295 | -0.252522 | 3.488908 | 6.472773 | 0.940283 | 4.198173 |
| <sup>3</sup> VII <sub>1a</sub>  | -4.722537 | -1.980173 | 3.351355 | 2.742364 | 2.047792 | 6.200932 |
| VIII <sub>1a</sub>              | -7.108976 | -0.215786 | 3.662381 | 6.893189 | 0.972919 | 3.814493 |
| <sup>3</sup> VIII <sub>1a</sub> | -5.098870 | -2.126842 | 3.612856 | 2.972028 | 2.195930 | 5.824598 |
| IX <sub>1a</sub>                | -7.873616 | -0.198099 | 4.035857 | 7.675517 | 1.061045 | 3.049853 |
| <sup>3</sup> IX <sub>1a</sub>   | -4.604167 | -2.714064 | 3.659116 | 1.890103 | 3.541904 | 6.319301 |

**Table S174. Unsubstituted Singlet NHCs in Test Set in SMD Toluene.** Entropy given in J/mol.K. All other quantities given in Hartree.

| Species            | DFT Energy  | ZPVE     | TC       | S          | TS       | H           | G           | G(Toluene)  |
|--------------------|-------------|----------|----------|------------|----------|-------------|-------------|-------------|
| I <sub>1a</sub>    | -304.793823 | 0.128038 | 0.007860 | 341.802100 | 0.038815 | -304.657926 | -304.696740 | -304.693721 |
| II <sub>1a</sub>   | -383.347085 | 0.183061 | 0.011151 | 404.834200 | 0.045973 | -383.152873 | -383.198846 | -383.195827 |
| III <sub>1a</sub>  | -344.080315 | 0.155669 | 0.009533 | 374.765700 | 0.042558 | -343.915113 | -343.957671 | -343.954652 |
| IV <sub>1a</sub>   | -285.336113 | 0.087198 | 0.006032 | 302.652600 | 0.034369 | -285.242883 | -285.277252 | -285.274233 |
| V <sub>1a</sub>    | -608.312739 | 0.083961 | 0.006411 | 314.263300 | 0.035688 | -608.222368 | -608.258055 | -608.255036 |
| VI <sub>1a</sub>   | -305.989059 | 0.150721 | 0.008553 | 348.356600 | 0.039559 | -305.829785 | -305.869344 | -305.866325 |
| VII <sub>1a</sub>  | -345.297371 | 0.180456 | 0.009275 | 367.959200 | 0.041785 | -345.107640 | -345.149426 | -345.146407 |
| VIII <sub>1a</sub> | -328.009647 | 0.166108 | 0.009289 | 364.973000 | 0.041446 | -327.834251 | -327.875697 | -327.872678 |
| IX <sub>1a</sub>   | -320.836154 | 0.116398 | 0.007655 | 338.072700 | 0.038391 | -320.712101 | -320.750492 | -320.747473 |

**Table S175. Unsubstituted Singlet NHCs in Test Set in SMD DCM.** Entropy given in J/mol.K. All other quantities given in Hartree.

| Species            | DFT Energy  | ZPVE     | TC       | S          | TS       | H           | G           | G(DCM)      |
|--------------------|-------------|----------|----------|------------|----------|-------------|-------------|-------------|
| I <sub>1a</sub>    | -304.798765 | 0.127896 | 0.007882 | 342.638700 | 0.038910 | -304.662986 | -304.701896 | -304.698877 |
| II <sub>1a</sub>   | -383.361529 | 0.183093 | 0.011180 | 406.047500 | 0.046110 | -383.167256 | -383.213367 | -383.210348 |
| III <sub>1a</sub>  | -344.090936 | 0.155777 | 0.009508 | 374.425800 | 0.042520 | -343.925651 | -343.968171 | -343.965152 |
| IV <sub>1a</sub>   | -285.341627 | 0.087106 | 0.006036 | 302.833500 | 0.034390 | -285.248485 | -285.282875 | -285.279856 |
| V <sub>1a</sub>    | -608.318001 | 0.083973 | 0.006407 | 314.216200 | 0.035682 | -608.227621 | -608.263303 | -608.260284 |
| VI <sub>1a</sub>   | -305.993524 | 0.150640 | 0.008557 | 348.208400 | 0.039542 | -305.834328 | -305.873870 | -305.870851 |
| VII <sub>1a</sub>  | -345.302062 | 0.180246 | 0.009329 | 369.384100 | 0.041947 | -345.112487 | -345.154434 | -345.151415 |
| VIII <sub>1a</sub> | -328.015110 | 0.165955 | 0.009277 | 364.766900 | 0.041423 | -327.839879 | -327.881301 | -327.878282 |
| IX <sub>1a</sub>   | -320.840927 | 0.116365 | 0.007655 | 338.118000 | 0.038396 | -320.716907 | -320.755303 | -320.752284 |

**Table S176. Unsubstituted Singlet NHCs in Test Set in SMD MeCN.** Entropy given in J/mol.K. All other quantities given in Hartree.

| Species            | DFT Energy  | ZPVE     | TC       | S          | TS       | H           | G           | G(MeCN)     |
|--------------------|-------------|----------|----------|------------|----------|-------------|-------------|-------------|
| I <sub>1a</sub>    | -304.799213 | 0.127870 | 0.007882 | 342.646800 | 0.038911 | -304.663460 | -304.702371 | -304.699352 |
| II <sub>1a</sub>   | -383.364921 | 0.183393 | 0.011049 | 402.965300 | 0.045760 | -383.170478 | -383.216238 | -383.213219 |
| III <sub>1a</sub>  | -344.093313 | 0.155827 | 0.009482 | 373.836200 | 0.042453 | -343.928003 | -343.970456 | -343.967437 |
| IV <sub>1a</sub>   | -285.342796 | 0.087088 | 0.006042 | 303.079900 | 0.034418 | -285.249665 | -285.284083 | -285.281064 |
| V <sub>1a</sub>    | -608.318523 | 0.083963 | 0.006419 | 314.654100 | 0.035732 | -608.228140 | -608.263872 | -608.260853 |
| VI <sub>1a</sub>   | -305.993746 | 0.150606 | 0.008568 | 348.513400 | 0.039577 | -305.834573 | -305.874150 | -305.871131 |
| VII <sub>1a</sub>  | -345.302245 | 0.180197 | 0.009333 | 369.499200 | 0.041960 | -345.112715 | -345.154675 | -345.151656 |
| VIII <sub>1a</sub> | -328.015226 | 0.165926 | 0.009267 | 364.550600 | 0.041398 | -327.840033 | -327.881431 | -327.878412 |
| IX <sub>1a</sub>   | -320.841486 | 0.116359 | 0.007655 | 338.138400 | 0.038399 | -320.717473 | -320.755871 | -320.752852 |

**Table S177. Unsubstituted Singlet NHCs in Test Set in SMD Water.** Entropy given in J/mol.K. All other quantities given in Hartree.

| Species            | DFT Energy  | ZPVE     | TC       | S          | TS       | H           | G           | G(Water)    |
|--------------------|-------------|----------|----------|------------|----------|-------------|-------------|-------------|
| I <sub>1a</sub>    | -304.784323 | 0.127864 | 0.007929 | 343.570000 | 0.039016 | -304.648529 | -304.687545 | -304.684526 |
| II <sub>1a</sub>   | -383.357607 | 0.183628 | 0.011042 | 402.870800 | 0.045750 | -383.162938 | -383.208687 | -383.205668 |
| III <sub>1a</sub>  | -344.081096 | 0.155912 | 0.009518 | 374.538300 | 0.042532 | -343.915666 | -343.958198 | -343.955179 |
| IV <sub>1a</sub>   | -285.335190 | 0.086797 | 0.006085 | 303.823400 | 0.034502 | -285.242308 | -285.276810 | -285.273791 |
| V <sub>1a</sub>    | -608.310676 | 0.084011 | 0.006434 | 314.931400 | 0.035763 | -608.220231 | -608.255994 | -608.252975 |
| VI <sub>1a</sub>   | -305.981202 | 0.150817 | 0.008514 | 346.637000 | 0.039364 | -305.821871 | -305.861235 | -305.858216 |
| VII <sub>1a</sub>  | -345.289543 | 0.180299 | 0.009414 | 371.435300 | 0.042180 | -345.099830 | -345.142010 | -345.138991 |
| VIII <sub>1a</sub> | -328.005237 | 0.165998 | 0.009283 | 364.821500 | 0.041429 | -327.829955 | -327.871384 | -327.868365 |
| IX <sub>1a</sub>   | -320.827393 | 0.116449 | 0.007691 | 338.840400 | 0.038478 | -320.703253 | -320.741731 | -320.738712 |

**Table S178. Orbital Energies and Philicity Parameters of Unsubstituted Singlet NHCs in Test Set in SMD Toluene.** All quantities given in eV.

| Species            | E(HOMO)   | E(LUMO)   | CHI      | ETA      | GEI      | N        |
|--------------------|-----------|-----------|----------|----------|----------|----------|
| I <sub>1a</sub>    | -7.652931 | -0.043810 | 3.848371 | 7.609121 | 0.973171 | 3.270537 |
| II <sub>1a</sub>   | -6.283382 | -0.269665 | 3.276523 | 6.013717 | 0.892593 | 4.640086 |
| III <sub>1a</sub>  | -6.795500 | -0.174425 | 3.484963 | 6.621075 | 0.917144 | 4.127968 |
| IV <sub>1a</sub>   | -8.223010 | -0.090342 | 4.156676 | 8.132668 | 1.062256 | 2.700458 |
| V <sub>1a</sub>    | -7.899739 | -0.094151 | 3.996945 | 7.805587 | 1.023342 | 3.023730 |
| VI <sub>1a</sub>   | -7.283673 | -0.093063 | 3.688368 | 7.190610 | 0.945960 | 3.639796 |
| VII <sub>1a</sub>  | -6.889924 | -0.101498 | 3.495711 | 6.788425 | 0.900061 | 4.033544 |
| VIII <sub>1a</sub> | -7.258638 | -0.072110 | 3.665374 | 7.186528 | 0.934733 | 3.664830 |
| IX <sub>1a</sub>   | -8.045320 | -0.048981 | 4.047150 | 7.996339 | 1.024183 | 2.878149 |

**Table S179. Orbital Energies and Philicity Parameters of Unsubstituted Singlet NHCs in Test Set in SMD DCM.** All quantities given in eV.

| Species            | E(HOMO)   | E(LUMO)   | CHI      | ETA      | GEI      | N        |
|--------------------|-----------|-----------|----------|----------|----------|----------|
| I <sub>1a</sub>    | -7.814023 | 0.021769  | 3.896127 | 7.835792 | 0.968620 | 3.109446 |
| II <sub>1a</sub>   | -6.770738 | -0.087076 | 3.428907 | 6.683662 | 0.879563 | 4.152730 |
| III <sub>1a</sub>  | -7.200134 | -0.033198 | 3.616666 | 7.166936 | 0.912543 | 3.723334 |
| IV <sub>1a</sub>   | -8.413762 | 0.026395  | 4.193683 | 8.440157 | 1.041863 | 2.509706 |
| V <sub>1a</sub>    | -8.076885 | 0.008436  | 4.034225 | 8.085320 | 1.006452 | 2.846584 |
| VI <sub>1a</sub>   | -7.298095 | -0.007075 | 3.652585 | 7.291020 | 0.914918 | 3.625373 |
| VII <sub>1a</sub>  | -7.130201 | -0.015783 | 3.572992 | 7.114418 | 0.897211 | 3.793268 |
| VIII <sub>1a</sub> | -7.464901 | 0.003265  | 3.730818 | 7.468166 | 0.931889 | 3.458568 |
| IX <sub>1a</sub>   | -8.247772 | 0.021497  | 4.113138 | 8.269269 | 1.022938 | 2.675696 |



**Table S180. Orbital Energies and Philicity Parameters of Unsubstituted Singlet NHCs in Test Set in SMD MeCN.** All quantities given in eV.

| Species            | E(HOMO)   | E(LUMO)   | CHI      | ETA      | GEI      | N        |
|--------------------|-----------|-----------|----------|----------|----------|----------|
| I <sub>1a</sub>    | -7.837969 | 0.037007  | 3.900481 | 7.874976 | 0.965955 | 3.085500 |
| II <sub>1a</sub>   | -6.973463 | -0.037552 | 3.505507 | 6.935911 | 0.885866 | 3.950005 |
| III <sub>1a</sub>  | -7.284217 | 0.000544  | 3.641836 | 7.284761 | 0.910323 | 3.639251 |
| IV <sub>1a</sub>   | -8.408592 | 0.053606  | 4.177493 | 8.462198 | 1.031141 | 2.514877 |
| V <sub>1a</sub>    | -8.151716 | 0.034286  | 4.058715 | 8.186002 | 1.006179 | 2.771752 |
| VI <sub>1a</sub>   | -7.305442 | 0.013878  | 3.645782 | 7.319320 | 0.907989 | 3.618026 |
| VII <sub>1a</sub>  | -7.234964 | 0.004626  | 3.615169 | 7.239590 | 0.902637 | 3.688504 |
| VIII <sub>1a</sub> | -7.553882 | -0.022041 | 3.787962 | 7.531841 | 0.952533 | 3.369586 |
| IX <sub>1a</sub>   | -8.328046 | 0.034558  | 4.146744 | 8.362604 | 1.028118 | 2.595422 |

**Table S181. Orbital Energies and Philicity Parameters of Unsubstituted Singlet NHCs in Test Set in SMD Water.** All quantities given in eV.

| Species            | E(HOMO)   | E(LUMO)   | CHI      | ETA      | GEI      | N        |
|--------------------|-----------|-----------|----------|----------|----------|----------|
| I <sub>1a</sub>    | -7.842867 | 0.039457  | 3.901705 | 7.882323 | 0.965661 | 3.080601 |
| II <sub>1a</sub>   | -7.015641 | -0.029388 | 3.522514 | 6.986252 | 0.888037 | 3.907828 |
| III <sub>1a</sub>  | -7.302449 | 0.005987  | 3.648231 | 7.308435 | 0.910564 | 3.621020 |
| IV <sub>1a</sub>   | -8.453490 | 0.076192  | 4.188649 | 8.529682 | 1.028455 | 2.469978 |
| V <sub>1a</sub>    | -8.168587 | 0.038368  | 4.065110 | 8.206955 | 1.006775 | 2.754881 |
| VI <sub>1a</sub>   | -7.424084 | 0.025307  | 3.699388 | 7.449390 | 0.918563 | 3.499385 |
| VII <sub>1a</sub>  | -7.258910 | 0.006803  | 3.626054 | 7.265713 | 0.904816 | 3.664558 |
| VIII <sub>1a</sub> | -7.574018 | -0.025579 | 3.799798 | 7.548440 | 0.956388 | 3.349450 |
| IX <sub>1a</sub>   | -8.345189 | 0.036463  | 4.154363 | 8.381652 | 1.029554 | 2.578279 |

## S11. Correction Procedure for Electrostatic Switch Values

For some  $\text{BF}_2$ -substituted species used in the calculation of electrostatic switches, we observe the favourable formation of an organoboron compound via an intramolecular carbene addition, or otherwise a notable interaction. However, using the uncharged member of each D-LEF pair to calculate our electrostatic switches is not strictly necessary. In the ideal case where the effects we observe are purely electrostatic (i.e. no through-bond effects), we could simply use the unsubstituted species as a reference, provided that the difference between the measured GEI and N values obtained for the uncharged species possessing no C-B interactions are small.

To that point, we find that the maximum difference in the GEI values of the  $\text{BF}_2$ -substituted species relative to the unsubstituted carbenes is 12.00%, with an average difference of 0.029 eV regardless of position, in the gas-phase. Likewise, we find that the maximum difference in the N values of the  $\text{BF}_2$ -substituted species relative to the unsubstituted carbenes is 19.39%, with an average difference of 0.002 eV regardless of position, in the gas-phase. However, we also find that these differences increase on average with increasing solvent polarity; therefore, while we have confidence that our correction procedure is valid for low-polarity environments, the values obtained for the  $\text{BF}_2$  to  $\text{BF}_3^-$  switches at the  $R_1$  positions which have formed C-B interactions should in general be regarded with some caution.

## S12. Gibbs Free Energies and Components, Frontier Orbital Energies, Nucleophilicity and Electrophilicity Parameters of D-LEF-Substituted NHCs in Test Set Across Different Solvents

**Table S182. Energies of I<sub>1b-e</sub> & I<sub>2b-e</sub> in Gas.** Entropy given in J/mol.K. All other quantities given in Hartree.

| Species                      | DFT Energy  | ZPVE     | TC       | S          | TS       | H           | G           | G(Gas)      |
|------------------------------|-------------|----------|----------|------------|----------|-------------|-------------|-------------|
| I <sub>1b</sub> <sup>a</sup> | -528.884820 | 0.128363 | 0.010003 | 391.314600 | 0.044437 | -528.746453 | -528.790891 | -528.790891 |
| I <sub>1c</sub>              | -628.864102 | 0.129903 | 0.011241 | 415.938100 | 0.047234 | -628.722958 | -628.770192 | -628.770192 |
| I <sub>1d</sub>              | -438.734088 | 0.202546 | 0.011189 | 410.023900 | 0.046562 | -438.520353 | -438.566915 | -438.566915 |
| I <sub>1e</sub>              | -478.416093 | 0.245437 | 0.012391 | 430.284800 | 0.048863 | -478.158265 | -478.207128 | -478.207128 |
| I <sub>2b</sub>              | -568.189054 | 0.156232 | 0.011938 | 430.578900 | 0.048896 | -568.020885 | -568.069781 | -568.069781 |
| I <sub>2c</sub>              | -668.179075 | 0.158056 | 0.012750 | 443.252400 | 0.050335 | -668.008269 | -668.058605 | -668.058605 |
| I <sub>2d</sub>              | -478.041002 | 0.230407 | 0.012916 | 443.445900 | 0.050357 | -477.797680 | -477.848037 | -477.848037 |
| I <sub>2e</sub>              | -517.719598 | 0.273647 | 0.013998 | 460.557000 | 0.052301 | -517.431952 | -517.484253 | -517.484253 |

<sup>a</sup> Forms a weak C-B interaction

**Table S183. Energies of I<sub>1b-e</sub> & I<sub>2b-e</sub> in SMD Toluene.** Entropy given in J/mol.K. All other quantities given in Hartree.

| Species                      | DFT Energy  | ZPVE     | TC       | S          | TS       | H           | G           | G(Toluene)  |
|------------------------------|-------------|----------|----------|------------|----------|-------------|-------------|-------------|
| I <sub>1b</sub> <sup>a</sup> | -528.890910 | 0.128116 | 0.010293 | 399.732200 | 0.045393 | -528.752501 | -528.797894 | -528.794875 |
| I <sub>1c</sub>              | -628.925655 | 0.130203 | 0.011205 | 415.695400 | 0.047206 | -628.784247 | -628.831453 | -628.828434 |
| I <sub>1d</sub>              | -438.752816 | 0.202763 | 0.011148 | 409.331300 | 0.046483 | -438.538905 | -438.585389 | -438.582370 |
| I <sub>1e</sub>              | -478.483721 | 0.245304 | 0.011589 | 414.948000 | 0.047121 | -478.226827 | -478.273949 | -478.270930 |
| I <sub>2b</sub>              | -568.207108 | 0.156283 | 0.011940 | 431.053500 | 0.048950 | -568.038885 | -568.087835 | -568.084816 |
| I <sub>2c</sub>              | -668.240664 | 0.158298 | 0.012756 | 444.217900 | 0.050445 | -668.069609 | -668.120054 | -668.117035 |
| I <sub>2d</sub>              | -478.059796 | 0.230503 | 0.012878 | 442.303400 | 0.050228 | -477.816415 | -477.866643 | -477.863624 |
| I <sub>2e</sub>              | -517.790690 | 0.275000 | 0.013599 | 450.040100 | 0.051106 | -517.502092 | -517.553198 | -517.550179 |

<sup>a</sup> Forms a weak C-B interaction

**Table S184. Energies of I<sub>1b-e</sub> & I<sub>2b-e</sub> in SMD DCM.** Entropy given in J/mol.K. All other quantities given in Hartree.

| Species         | DFT Energy  | ZPVE     | TC       | S          | TS       | H           | G           | G(DCM)      |
|-----------------|-------------|----------|----------|------------|----------|-------------|-------------|-------------|
| I <sub>1b</sub> | -528.898025 | 0.127952 | 0.010306 | 400.145700 | 0.045440 | -528.759766 | -528.805206 | -528.802187 |
| I <sub>1c</sub> | -628.956931 | 0.130109 | 0.011214 | 416.991900 | 0.047353 | -628.815608 | -628.862962 | -628.859943 |
| I <sub>1d</sub> | -438.758929 | 0.202660 | 0.011137 | 409.254200 | 0.046475 | -438.545133 | -438.591607 | -438.588588 |
| I <sub>1e</sub> | -478.514616 | 0.246134 | 0.012257 | 428.129700 | 0.048618 | -478.256225 | -478.304843 | -478.301824 |
| I <sub>2b</sub> | -568.214484 | 0.156098 | 0.011893 | 429.188100 | 0.048738 | -568.046493 | -568.095231 | -568.092212 |
| I <sub>2c</sub> | -668.271562 | 0.158256 | 0.012766 | 444.731100 | 0.050503 | -668.100540 | -668.151043 | -668.148024 |
| I <sub>2d</sub> | -478.065610 | 0.230310 | 0.012895 | 443.081200 | 0.050316 | -477.822405 | -477.872721 | -477.869702 |
| I <sub>2e</sub> | -517.824085 | 0.274744 | 0.013757 | 455.257500 | 0.051699 | -517.535584 | -517.587283 | -517.584264 |

**Table S185. Energies of I<sub>1b-e</sub> & I<sub>2b-e</sub> in SMD MeCN.** Entropy given in J/mol.K. All other quantities given in Hartree.

| Species         | DFT Energy  | ZPVE     | TC       | S          | TS       | H           | G           | G(MeCN)     |
|-----------------|-------------|----------|----------|------------|----------|-------------|-------------|-------------|
| I <sub>1b</sub> | -528.899209 | 0.127896 | 0.010310 | 400.285200 | 0.045456 | -528.761003 | -528.806459 | -528.803440 |
| I <sub>1c</sub> | -628.965202 | 0.130060 | 0.011218 | 417.213100 | 0.047378 | -628.823924 | -628.871303 | -628.868284 |
| I <sub>1d</sub> | -438.759213 | 0.202659 | 0.011122 | 408.934000 | 0.046438 | -438.545433 | -438.591871 | -438.588852 |
| I <sub>1e</sub> | -478.521944 | 0.246285 | 0.012214 | 427.090500 | 0.048500 | -478.263445 | -478.311945 | -478.308926 |
| I <sub>2b</sub> | -568.215768 | 0.156044 | 0.011898 | 429.440600 | 0.048767 | -568.047826 | -568.096593 | -568.093574 |
| I <sub>2c</sub> | -668.279124 | 0.158104 | 0.012815 | 446.076800 | 0.050656 | -668.108205 | -668.158861 | -668.155842 |
| I <sub>2d</sub> | -478.065664 | 0.230384 | 0.012858 | 442.283600 | 0.050225 | -477.822422 | -477.872647 | -477.869628 |
| I <sub>2e</sub> | -517.832256 | 0.274704 | 0.013787 | 456.493400 | 0.051839 | -517.543765 | -517.595604 | -517.592585 |

**Table S186. Energies of I<sub>1b-e</sub> & I<sub>2b-e</sub> in SMD Water.** Entropy given in J/mol.K. All other quantities given in Hartree.

| Species         | DFT Energy  | ZPVE     | TC       | S          | TS       | H           | G           | G(Water)    |
|-----------------|-------------|----------|----------|------------|----------|-------------|-------------|-------------|
| I <sub>1b</sub> | -528.884593 | 0.128038 | 0.010412 | 402.774300 | 0.045739 | -528.746144 | -528.791882 | -528.788863 |
| I <sub>1c</sub> | -628.950599 | 0.130138 | 0.011232 | 417.436800 | 0.047404 | -628.809229 | -628.856633 | -628.853614 |
| I <sub>1d</sub> | -438.747269 | 0.203121 | 0.011058 | 407.483600 | 0.046274 | -438.533090 | -438.579364 | -438.576345 |
| I <sub>1e</sub> | -478.504559 | 0.246417 | 0.012224 | 427.200900 | 0.048513 | -478.245918 | -478.294431 | -478.291412 |
| I <sub>2b</sub> | -568.200543 | 0.156087 | 0.011921 | 429.722600 | 0.048799 | -568.032535 | -568.081334 | -568.078315 |
| I <sub>2c</sub> | -668.264337 | 0.158084 | 0.012858 | 446.839500 | 0.050743 | -668.093394 | -668.144137 | -668.141118 |
| I <sub>2d</sub> | -478.051722 | 0.230839 | 0.012882 | 444.384400 | 0.050464 | -477.808001 | -477.858465 | -477.855446 |
| I <sub>2e</sub> | -517.814468 | 0.274759 | 0.013843 | 457.732200 | 0.051980 | -517.525866 | -517.577845 | -517.574826 |

**Table S187. Energies of II<sub>1b-e</sub> & II<sub>2b-e</sub> in Gas.** Entropy given in J/mol.K. All other quantities given in Hartree.

| Species                       | DFT Energy  | ZPVE     | TC       | S          | TS       | H           | G           | G(Gas)      |
|-------------------------------|-------------|----------|----------|------------|----------|-------------|-------------|-------------|
| II <sub>1b</sub> <sup>a</sup> | -607.427448 | 0.183541 | 0.013523 | 457.912300 | 0.052000 | -607.230390 | -607.282390 | -607.282390 |
| II <sub>1c</sub>              | -707.411844 | 0.185021 | 0.014292 | 469.763400 | 0.053346 | -707.212530 | -707.265880 | -707.265880 |
| II <sub>1d</sub>              | -517.279212 | 0.257628 | 0.014575 | 472.549000 | 0.053662 | -517.007010 | -517.060670 | -517.060670 |
| II <sub>1e</sub>              | -556.979326 | 0.301031 | 0.015718 | 490.905000 | 0.055747 | -556.662580 | -556.718320 | -556.718320 |
| II <sub>2b</sub>              | -607.420875 | 0.182995 | 0.013587 | 458.560200 | 0.052074 | -607.224290 | -607.276370 | -607.276370 |
| II <sub>2c</sub>              | -707.431256 | 0.185576 | 0.014287 | 468.749600 | 0.053231 | -707.231390 | -707.284620 | -707.284620 |
| II <sub>2d</sub>              | -517.284313 | 0.257540 | 0.014411 | 467.144500 | 0.053049 | -517.012360 | -517.065410 | -517.065410 |
| II <sub>2e</sub>              | -556.948936 | 0.299967 | 0.015544 | 485.039200 | 0.055081 | -556.633430 | -556.688510 | -556.688510 |

<sup>a</sup> Forms a weak C-B interaction**Table S188. Energies of II<sub>1b-e</sub> & II<sub>2b-e</sub> in SMD Toluene.** Entropy given in J/mol.K. All other quantities given in Hartree.

| Species          | DFT Energy  | ZPVE     | TC       | S          | TS       | H           | G           | G(Toluene)  |
|------------------|-------------|----------|----------|------------|----------|-------------|-------------|-------------|
| II <sub>1b</sub> | -607.450576 | 0.183250 | 0.013797 | 465.670000 | 0.052881 | -607.253530 | -607.306410 | -607.303391 |
| II <sub>1c</sub> | -707.476167 | 0.185595 | 0.014317 | 470.850900 | 0.053469 | -707.276260 | -707.329730 | -707.326711 |
| II <sub>1d</sub> | -517.300343 | 0.257764 | 0.014637 | 475.238500 | 0.053968 | -517.027940 | -517.081910 | -517.078891 |
| II <sub>1e</sub> | -557.039674 | 0.303767 | 0.014878 | 472.209100 | 0.053624 | -556.721030 | -556.774650 | -556.771631 |
| II <sub>2b</sub> | -607.450576 | 0.183250 | 0.013797 | 465.670000 | 0.052881 | -607.253530 | -607.306410 | -607.303391 |
| II <sub>2c</sub> | -707.476167 | 0.185595 | 0.014317 | 470.850900 | 0.053469 | -707.276260 | -707.329730 | -707.326711 |
| II <sub>2d</sub> | -517.300343 | 0.257764 | 0.014637 | 475.238500 | 0.053968 | -517.027940 | -517.081910 | -517.078891 |
| II <sub>2e</sub> | -557.039674 | 0.303767 | 0.014878 | 472.209100 | 0.053624 | -556.721030 | -556.774650 | -556.771631 |

**Table S189. Energies of II<sub>1b-e</sub> & II<sub>2b-e</sub> in SMD DCM.** Entropy given in J/mol.K. All other quantities given in Hartree.

| Species          | DFT Energy  | ZPVE     | TC       | S          | TS       | H           | G           | G(DCM)      |
|------------------|-------------|----------|----------|------------|----------|-------------|-------------|-------------|
| II <sub>1b</sub> | -607.465249 | 0.183260 | 0.013777 | 466.199700 | 0.052941 | -607.268210 | -607.321150 | -607.318131 |
| II <sub>1c</sub> | -707.518839 | 0.185820 | 0.014387 | 473.876700 | 0.053813 | -707.318630 | -707.372450 | -707.369431 |
| II <sub>1d</sub> | -517.311329 | 0.258319 | 0.014320 | 467.388100 | 0.053076 | -517.038690 | -517.091770 | -517.088751 |
| II <sub>1e</sub> | -557.075877 | 0.302843 | 0.015122 | 478.276800 | 0.054313 | -556.757910 | -556.812220 | -556.809201 |
| II <sub>2b</sub> | -607.459488 | 0.183581 | 0.013353 | 452.428900 | 0.051377 | -607.262550 | -607.313930 | -607.310911 |
| II <sub>2c</sub> | -707.524518 | 0.185513 | 0.014435 | 473.631000 | 0.053785 | -707.324570 | -707.378360 | -707.375341 |
| II <sub>2d</sub> | -517.320154 | 0.257607 | 0.014485 | 470.482700 | 0.053428 | -517.048060 | -517.101490 | -517.098471 |
| II <sub>2e</sub> | -557.067605 | 0.302484 | 0.014989 | 473.276500 | 0.053745 | -556.750130 | -556.803880 | -556.800861 |

**Table S190. Energies of II<sub>1b-e</sub> & II<sub>2b-e</sub> in SMD MeCN.** Entropy given in J/mol.K. All other quantities given in Hartree.

| Species          | DFT Energy  | ZPVE     | TC       | S          | TS       | H           | G           | G(MeCN)     |
|------------------|-------------|----------|----------|------------|----------|-------------|-------------|-------------|
| II <sub>1b</sub> | -607.468917 | 0.183411 | 0.013697 | 464.326500 | 0.052729 | -607.271810 | -607.324540 | -607.321521 |
| II <sub>1c</sub> | -707.530979 | 0.185941 | 0.014347 | 472.953000 | 0.053708 | -707.330690 | -707.384400 | -707.381381 |
| II <sub>1d</sub> | -517.311329 | 0.258319 | 0.014320 | 467.388100 | 0.053076 | -517.038690 | -517.091770 | -517.088751 |
| II <sub>1e</sub> | -557.075877 | 0.302843 | 0.015122 | 478.276800 | 0.054313 | -556.757910 | -556.812220 | -556.809201 |
| II <sub>2b</sub> | -607.464092 | 0.183682 | 0.013315 | 451.918500 | 0.051320 | -607.267100 | -607.318420 | -607.315401 |
| II <sub>2c</sub> | -707.533590 | 0.185669 | 0.014346 | 470.972400 | 0.053483 | -707.333570 | -707.387060 | -707.384041 |
| II <sub>2d</sub> | -517.320154 | 0.257607 | 0.014485 | 470.482700 | 0.053428 | -517.048060 | -517.101490 | -517.098471 |
| II <sub>2e</sub> | -557.067605 | 0.302484 | 0.014989 | 473.276500 | 0.053745 | -556.750130 | -556.803880 | -556.800861 |

**Table S191. Energies of II<sub>1b-e</sub> & II<sub>2b-e</sub> in SMD Water.** Entropy given in J/mol.K. All other quantities given in Hartree.

| Species          | DFT Energy  | ZPVE     | TC       | S          | TS       | H           | G           | G(Water)    |
|------------------|-------------|----------|----------|------------|----------|-------------|-------------|-------------|
| II <sub>1b</sub> | -607.461221 | 0.183570 | 0.013718 | 464.880500 | 0.052791 | -607.263930 | -607.316720 | -607.313701 |
| II <sub>1c</sub> | -707.524377 | 0.185993 | 0.014409 | 474.614600 | 0.053897 | -707.323970 | -707.377870 | -707.374851 |
| II <sub>1d</sub> | -517.310975 | 0.258760 | 0.014343 | 468.516500 | 0.053204 | -517.037870 | -517.091080 | -517.088061 |
| II <sub>1e</sub> | -557.074399 | 0.302970 | 0.015158 | 478.648300 | 0.054355 | -556.756270 | -556.810630 | -556.807611 |
| II <sub>2b</sub> | -607.455967 | 0.183758 | 0.013342 | 452.603700 | 0.051397 | -607.258870 | -607.310260 | -607.307241 |
| II <sub>2c</sub> | -707.525738 | 0.185791 | 0.014362 | 471.381300 | 0.053530 | -707.325590 | -707.379110 | -707.376091 |
| II <sub>2d</sub> | -517.315352 | 0.258525 | 0.014298 | 466.585800 | 0.052985 | -517.042530 | -517.095510 | -517.092491 |
| II <sub>2e</sub> | -557.068061 | 0.302701 | 0.015002 | 473.260800 | 0.053743 | -556.750360 | -556.804100 | -556.801081 |

**Table S192. Energies of III<sub>[1-4][b-e]</sub> in Gas.** Entropy given in J/mol.K. All other quantities given in Hartree.

| Species                        | DFT Energy  | ZPVE     | TC       | S          | TS       | H           | G           | G(Gas)      |
|--------------------------------|-------------|----------|----------|------------|----------|-------------|-------------|-------------|
| III <sub>1b</sub> <sup>a</sup> | -568.156499 | 0.155561 | 0.011957 | 429.548200 | 0.048779 | -567.988980 | -568.037760 | -568.037760 |
| III <sub>1c</sub>              | -668.152429 | 0.157480 | 0.012959 | 448.113600 | 0.050887 | -667.981990 | -668.032880 | -668.032880 |
| III <sub>1d</sub>              | -478.016039 | 0.230041 | 0.012892 | 441.409700 | 0.050126 | -477.773110 | -477.823230 | -477.823230 |
| III <sub>1e</sub>              | -517.703314 | 0.273344 | 0.013851 | 454.592700 | 0.051623 | -517.416120 | -517.467740 | -517.467740 |
| III <sub>2b</sub>              | -607.471138 | 0.183880 | 0.013507 | 457.009000 | 0.051898 | -607.273750 | -607.325650 | -607.325650 |
| III <sub>2c</sub>              | -707.477937 | 0.185899 | 0.014391 | 473.230800 | 0.053740 | -707.277650 | -707.331390 | -707.331390 |
| III <sub>2d</sub>              | -517.321881 | 0.258969 | 0.014131 | 461.573800 | 0.052416 | -517.048780 | -517.101200 | -517.101200 |
| III <sub>2e</sub>              | -556.995493 | 0.301446 | 0.015355 | 481.068300 | 0.054630 | -556.678692 | -556.733321 | -556.733321 |
| III <sub>3b</sub>              | -568.155082 | 0.155660 | 0.011933 | 429.091900 | 0.048727 | -567.987490 | -568.036220 | -568.036220 |
| III <sub>3c</sub>              | -668.163450 | 0.157789 | 0.012914 | 448.203600 | 0.050898 | -667.992750 | -668.043650 | -668.043650 |
| III <sub>3d</sub>              | -478.014071 | 0.229793 | 0.012954 | 443.520000 | 0.050366 | -477.771330 | -477.821690 | -477.821690 |
| III <sub>3e</sub>              | -517.681112 | 0.272883 | 0.013949 | 458.274300 | 0.052041 | -517.394280 | -517.446320 | -517.446320 |
| III <sub>4b</sub>              | -568.162980 | 0.156052 | 0.012085 | 435.193200 | 0.049420 | -567.994840 | -568.044260 | -568.044260 |
| III <sub>4c</sub>              | -668.140173 | 0.157726 | 0.012756 | 442.403000 | 0.050239 | -667.969690 | -668.019930 | -668.019930 |
| III <sub>4d</sub>              | -478.013434 | 0.230207 | 0.012960 | 444.447100 | 0.050471 | -477.770270 | -477.820740 | -477.820740 |
| III <sub>4e</sub>              | -517.710844 | 0.273835 | 0.014096 | 462.355500 | 0.052505 | -517.422910 | -517.475420 | -517.475420 |

<sup>a</sup> Forms a weak C-B interaction**Table S193. Energies of III<sub>[1-4][b-e]</sub> in SMD Toluene.** Entropy given in J/mol.K. All other quantities given in Hartree.

| Species                        | DFT Energy  | ZPVE     | TC       | S          | TS       | H           | G           | G(Toluene)  |
|--------------------------------|-------------|----------|----------|------------|----------|-------------|-------------|-------------|
| III <sub>1b</sub> <sup>a</sup> | -568.176569 | 0.155949 | 0.011872 | 427.607800 | 0.048559 | -568.008750 | -568.057310 | -568.054291 |
| III <sub>1c</sub>              | -668.215132 | 0.158013 | 0.012892 | 447.051800 | 0.050767 | -668.044230 | -668.094990 | -668.091971 |
| III <sub>1d</sub>              | -478.038273 | 0.230222 | 0.012862 | 441.100300 | 0.050091 | -477.795190 | -477.845280 | -477.842261 |
| III <sub>1e</sub>              | -517.770911 | 0.274559 | 0.013725 | 453.653100 | 0.051517 | -517.482630 | -517.534140 | -517.531121 |
| III <sub>2b</sub>              | -607.491816 | 0.183549 | 0.012882 | 445.824800 | 0.050628 | -607.295390 | -607.346010 | -607.342991 |
| III <sub>2c</sub>              | -707.536149 | 0.186229 | 0.014351 | 472.273900 | 0.053631 | -707.335568 | -707.389199 | -707.386180 |
| III <sub>2d</sub>              | -517.344015 | 0.258614 | 0.014415 | 470.436300 | 0.053422 | -517.070990 | -517.124410 | -517.121391 |
| III <sub>2e</sub>              | -557.070145 | 0.303862 | 0.014752 | 467.810400 | 0.053124 | -556.751530 | -556.804654 | -556.801635 |
| III <sub>3b</sub>              | -568.176186 | 0.155941 | 0.011876 | 428.156100 | 0.048621 | -568.008370 | -568.056990 | -568.053971 |
| III <sub>3c</sub>              | -668.222125 | 0.158321 | 0.012818 | 445.970200 | 0.050644 | -668.050990 | -668.101630 | -668.098611 |
| III <sub>3d</sub>              | -478.036541 | 0.230240 | 0.012861 | 441.076400 | 0.050088 | -477.793440 | -477.843530 | -477.840511 |
| III <sub>3e</sub>              | -517.757968 | 0.275395 | 0.013377 | 446.057600 | 0.050654 | -517.469200 | -517.519850 | -517.516831 |
| III <sub>4b</sub>              | -568.182687 | 0.156439 | 0.011935 | 430.790000 | 0.048920 | -568.014310 | -568.063230 | -568.060211 |
| III <sub>4c</sub>              | -668.205829 | 0.158636 | 0.012539 | 437.464800 | 0.049678 | -668.034650 | -668.084330 | -668.081311 |
| III <sub>4d</sub>              | -478.034263 | 0.230425 | 0.012940 | 444.428300 | 0.050469 | -477.790900 | -477.841370 | -477.838351 |
| III <sub>4e</sub>              | -517.773268 | 0.275170 | 0.013701 | 452.928400 | 0.051434 | -517.484400 | -517.535830 | -517.532811 |

<sup>a</sup> Forms a weak C-B interaction

**Table S194. Energies of III<sub>[1-4][b-e]</sub> in SMD DCM.** Entropy given in J/mol.K. All other quantities given in Hartree.

| Species                        | DFT Energy  | ZPVE     | TC       | S          | TS       | H           | G           | G(DCM)      |
|--------------------------------|-------------|----------|----------|------------|----------|-------------|-------------|-------------|
| III <sub>1b</sub> <sup>a</sup> | -568.190648 | 0.155981 | 0.011836 | 426.891000 | 0.048477 | -568.022830 | -568.071310 | -568.068291 |
| III <sub>1c</sub>              | -668.250079 | 0.158113 | 0.012847 | 445.799500 | 0.050625 | -668.079120 | -668.129750 | -668.126731 |
| III <sub>1d</sub>              | -478.049074 | 0.230140 | 0.012848 | 440.987000 | 0.050078 | -477.806090 | -477.856160 | -477.853141 |
| III <sub>1e</sub>              | -517.805618 | 0.273733 | 0.013824 | 455.653000 | 0.051744 | -517.518060 | -517.569800 | -517.566781 |
| III <sub>2b</sub>              | -607.505779 | 0.184067 | 0.013426 | 455.396900 | 0.051715 | -607.308290 | -607.360000 | -607.356981 |
| III <sub>2c</sub>              | -707.568621 | 0.186076 | 0.013667 | 460.402400 | 0.052283 | -707.368880 | -707.421160 | -707.418141 |
| III <sub>2d</sub>              | -517.355385 | 0.259317 | 0.014017 | 458.900800 | 0.052112 | -517.082050 | -517.134160 | -517.131141 |
| III <sub>2e</sub>              | -557.111049 | 0.303497 | 0.014852 | 469.734100 | 0.053343 | -556.792701 | -556.846043 | -556.843024 |
| III <sub>3b</sub>              | -568.189312 | 0.155926 | 0.011875 | 428.198600 | 0.048626 | -568.021510 | -568.070140 | -568.067121 |
| III <sub>3c</sub>              | -668.253567 | 0.158144 | 0.012831 | 446.582000 | 0.050714 | -668.082590 | -668.133310 | -668.130291 |
| III <sub>3d</sub>              | -478.048081 | 0.230296 | 0.012825 | 440.253100 | 0.049995 | -477.804960 | -477.854960 | -477.851941 |
| III <sub>3e</sub>              | -517.799033 | 0.274785 | 0.013550 | 450.056900 | 0.051108 | -517.510700 | -517.561810 | -517.558791 |
| III <sub>4b</sub>              | -568.194183 | 0.156316 | 0.011946 | 431.143300 | 0.048960 | -568.025920 | -568.074880 | -568.071861 |
| III <sub>4c</sub>              | -668.244133 | 0.158217 | 0.012759 | 443.420300 | 0.050354 | -668.073160 | -668.123510 | -668.120491 |
| III <sub>4d</sub>              | -478.044673 | 0.230423 | 0.012890 | 443.057400 | 0.050313 | -477.801360 | -477.851670 | -477.848651 |
| III <sub>4e</sub>              | -517.808200 | 0.274535 | 0.013860 | 458.438800 | 0.052060 | -517.519810 | -517.571870 | -517.568851 |

<sup>a</sup> Forms a weak C-B interaction**Table S195. Energies of III<sub>[1-4][b-e]</sub> in SMD MeCN.** Entropy given in J/mol.K. All other quantities given in Hartree.

| Species           | DFT Energy  | ZPVE     | TC       | S          | TS       | H           | G           | G(MeCN)     |
|-------------------|-------------|----------|----------|------------|----------|-------------|-------------|-------------|
| III <sub>1b</sub> | -568.193646 | 0.155932 | 0.011836 | 426.875100 | 0.048476 | -568.025880 | -568.074350 | -568.071331 |
| III <sub>1c</sub> | -668.258802 | 0.157953 | 0.012810 | 445.334500 | 0.050572 | -668.088040 | -668.138610 | -668.135591 |
| III <sub>1d</sub> | -478.050849 | 0.230243 | 0.012781 | 439.147300 | 0.049869 | -477.807820 | -477.857690 | -477.854671 |
| III <sub>1e</sub> | -517.814616 | 0.273896 | 0.013814 | 455.093700 | 0.051680 | -517.526910 | -517.578590 | -517.575571 |
| III <sub>2b</sub> | -607.508919 | 0.183955 | 0.013533 | 459.731600 | 0.052207 | -607.311430 | -607.363640 | -607.360621 |
| III <sub>2c</sub> | -707.577677 | 0.186175 | 0.014362 | 473.055000 | 0.053720 | -707.377140 | -707.430860 | -707.427841 |
| III <sub>2d</sub> | -517.358331 | 0.258667 | 0.014348 | 468.844800 | 0.053242 | -517.085320 | -517.138560 | -517.135541 |
| III <sub>2e</sub> | -557.121973 | 0.303645 | 0.014834 | 469.881000 | 0.053359 | -556.803494 | -556.856853 | -556.853834 |
| III <sub>3b</sub> | -568.192761 | 0.155983 | 0.011845 | 427.594900 | 0.048557 | -568.024930 | -568.073490 | -568.070471 |
| III <sub>3c</sub> | -668.261114 | 0.158000 | 0.012869 | 447.275600 | 0.050792 | -668.090250 | -668.141040 | -668.138021 |
| III <sub>3d</sub> | -478.050348 | 0.230309 | 0.012817 | 440.212600 | 0.049990 | -477.807220 | -477.857210 | -477.854191 |
| III <sub>3e</sub> | -517.810096 | 0.274648 | 0.013633 | 452.190800 | 0.051350 | -517.521820 | -517.573170 | -517.570151 |
| III <sub>4b</sub> | -568.196919 | 0.156231 | 0.011981 | 432.272100 | 0.049088 | -568.028710 | -568.077800 | -568.074781 |
| III <sub>4c</sub> | -668.254699 | 0.157946 | 0.012900 | 448.925600 | 0.050980 | -668.083850 | -668.134830 | -668.131811 |
| III <sub>4d</sub> | -478.046542 | 0.230543 | 0.012821 | 441.074900 | 0.050088 | -477.803180 | -477.853270 | -477.850251 |
| III <sub>4e</sub> | -517.816210 | 0.274746 | 0.013794 | 456.903300 | 0.051886 | -517.527670 | -517.579560 | -517.576541 |



**Table SX196. Energies of III<sub>[1-4][b-e]</sub> in SMD Water.** Entropy given in J/mol.K. All other quantities given in Hartree.

| Species           | DFT Energy  | ZPVE     | TC       | S          | TS       | H           | G           | G(Water)    |
|-------------------|-------------|----------|----------|------------|----------|-------------|-------------|-------------|
| III <sub>1b</sub> | -568.181001 | 0.155967 | 0.011883 | 427.948900 | 0.048598 | -568.013150 | -568.061750 | -568.058731 |
| III <sub>1c</sub> | -668.247378 | 0.158079 | 0.012830 | 445.890100 | 0.050635 | -668.076470 | -668.127100 | -668.124081 |
| III <sub>1d</sub> | -478.041442 | 0.231045 | 0.012659 | 436.896000 | 0.049614 | -477.797740 | -477.847350 | -477.844331 |
| III <sub>1e</sub> | -517.799810 | 0.274145 | 0.013836 | 455.596100 | 0.051737 | -517.511830 | -517.563570 | -517.560551 |
| III <sub>2b</sub> | -607.498590 | 0.184191 | 0.013507 | 458.820300 | 0.052103 | -607.300890 | -607.353000 | -607.349981 |
| III <sub>2c</sub> | -707.567435 | 0.186190 | 0.014432 | 474.992100 | 0.053940 | -707.366810 | -707.420750 | -707.417731 |
| III <sub>2d</sub> | -517.349546 | 0.259089 | 0.014315 | 468.184100 | 0.053167 | -517.076140 | -517.129310 | -517.126291 |
| III <sub>2e</sub> | -557.109015 | 0.303719 | 0.014876 | 470.665200 | 0.053448 | -556.790420 | -556.843869 | -556.840850 |
| III <sub>3b</sub> | -568.179967 | 0.156073 | 0.011868 | 428.114200 | 0.048616 | -568.012030 | -568.060640 | -568.057621 |
| III <sub>3c</sub> | -668.249178 | 0.158059 | 0.012902 | 447.871500 | 0.050860 | -668.078220 | -668.129080 | -668.126061 |
| III <sub>3d</sub> | -478.039606 | 0.230973 | 0.012744 | 439.673000 | 0.049929 | -477.795890 | -477.845820 | -477.842801 |
| III <sub>3e</sub> | -517.795610 | 0.274876 | 0.013630 | 452.061100 | 0.051336 | -517.507100 | -517.558440 | -517.555421 |
| III <sub>4b</sub> | -568.184595 | 0.156281 | 0.012041 | 433.715800 | 0.049252 | -568.016270 | -568.065530 | -568.062511 |
| III <sub>4c</sub> | -668.245190 | 0.158368 | 0.012829 | 446.193700 | 0.050669 | -668.073990 | -668.124660 | -668.121641 |
| III <sub>4d</sub> | -478.035420 | 0.231166 | 0.012798 | 441.459300 | 0.050132 | -477.791460 | -477.841590 | -477.838571 |
| III <sub>4e</sub> | -517.800872 | 0.275013 | 0.013762 | 455.814700 | 0.051762 | -517.512100 | -517.563860 | -517.560841 |

**Table S197. Energies of IV<sub>[1-3][b-e]</sub> in Gas.** Entropy given in J/mol.K. All other quantities given in Hartree.

| Species          | DFT Energy  | ZPVE     | TC       | S          | TS       | H           | G           | G(Gas)      |
|------------------|-------------|----------|----------|------------|----------|-------------|-------------|-------------|
| IV <sub>1b</sub> | -509.425382 | 0.087288 | 0.008584 | 366.723100 | 0.041645 | -509.329510 | -509.371160 | -509.371160 |
| IV <sub>1c</sub> | -609.423891 | 0.089154 | 0.009453 | 382.313000 | 0.043415 | -609.325290 | -609.368700 | -609.368700 |
| IV <sub>1d</sub> | -419.284202 | 0.161543 | 0.009459 | 376.532100 | 0.042759 | -419.113200 | -419.155960 | -419.155960 |
| IV <sub>1e</sub> | -458.953180 | 0.204277 | 0.010644 | 396.714300 | 0.045051 | -458.738260 | -458.783310 | -458.783310 |
| IV <sub>2b</sub> | -548.739621 | 0.115363 | 0.010121 | 395.378100 | 0.044899 | -548.614140 | -548.659040 | -548.659040 |
| IV <sub>2c</sub> | -648.738228 | 0.117343 | 0.010952 | 409.353100 | 0.046486 | -648.609930 | -648.656420 | -648.656420 |
| IV <sub>2d</sub> | -458.592395 | 0.189583 | 0.011092 | 407.808600 | 0.046310 | -458.391720 | -458.438030 | -458.438030 |
| IV <sub>2e</sub> | -498.259548 | 0.232672 | 0.012188 | 425.475500 | 0.048317 | -498.014690 | -498.063010 | -498.063010 |
| IV <sub>3b</sub> | -548.742543 | 0.115066 | 0.010240 | 398.642000 | 0.045269 | -548.617240 | -548.662510 | -548.662510 |
| IV <sub>3c</sub> | -648.736104 | 0.116742 | 0.011177 | 415.955200 | 0.047236 | -648.608190 | -648.655420 | -648.655420 |
| IV <sub>3d</sub> | -458.591628 | 0.189306 | 0.011186 | 410.542800 | 0.046621 | -458.391140 | -458.437760 | -458.437760 |
| IV <sub>3e</sub> | -498.271251 | 0.232516 | 0.012323 | 428.929100 | 0.048709 | -498.026410 | -498.075120 | -498.075120 |

**Table S198. Energies of IV<sub>[1-3][b-e]</sub> in SMD Toluene.** Entropy given in J/mol.K. All other quantities given in Hartree.

| Species          | DFT Energy  | ZPVE     | TC       | S          | TS       | H           | G           | G(Toluene)  |
|------------------|-------------|----------|----------|------------|----------|-------------|-------------|-------------|
| IV <sub>1b</sub> | -509.433208 | 0.087444 | 0.008578 | 367.037000 | 0.041680 | -509.337190 | -509.378870 | -509.375851 |
| IV <sub>1c</sub> | -609.473649 | 0.089464 | 0.009372 | 380.701800 | 0.043232 | -609.374810 | -609.418050 | -609.415031 |
| IV <sub>1d</sub> | -419.295649 | 0.161667 | 0.009438 | 375.924100 | 0.042690 | -419.124550 | -419.167230 | -419.164211 |
| IV <sub>1e</sub> | -459.018466 | 0.205065 | 0.010453 | 391.760500 | 0.044488 | -458.802950 | -458.847440 | -458.844421 |
| IV <sub>2b</sub> | -548.749877 | 0.115339 | 0.010163 | 396.538400 | 0.045031 | -548.624380 | -548.669410 | -548.666391 |
| IV <sub>2c</sub> | -648.788733 | 0.117467 | 0.010974 | 410.660800 | 0.046634 | -648.660290 | -648.706930 | -648.703911 |
| IV <sub>2d</sub> | -458.603142 | 0.189678 | 0.011093 | 408.059100 | 0.046339 | -458.402370 | -458.448710 | -458.445691 |
| IV <sub>2e</sub> | -498.327323 | 0.234312 | 0.011784 | 416.648000 | 0.047314 | -498.081230 | -498.128540 | -498.125521 |
| IV <sub>3b</sub> | -548.752857 | 0.115152 | 0.010247 | 399.162700 | 0.045329 | -548.627460 | -548.672790 | -548.669771 |
| IV <sub>3c</sub> | -648.789839 | 0.117089 | 0.011147 | 415.668600 | 0.047203 | -648.661600 | -648.708810 | -648.705791 |
| IV <sub>3d</sub> | -458.603478 | 0.189430 | 0.011193 | 410.950300 | 0.046667 | -458.402860 | -458.449520 | -458.446501 |
| IV <sub>3e</sub> | -498.334698 | 0.233077 | 0.012265 | 426.613500 | 0.048446 | -498.089360 | -498.137800 | -498.134781 |

**Table S199. Energies of IV<sub>[1-3][b-e]</sub> in SMD DCM.** Entropy given in J/mol.K. All other quantities given in Hartree.

| Species          | DFT Energy  | ZPVE     | TC       | S          | TS       | H           | G           | G(DCM)      |
|------------------|-------------|----------|----------|------------|----------|-------------|-------------|-------------|
| IV <sub>1b</sub> | -509.440061 | 0.086963 | 0.008560 | 366.640600 | 0.041635 | -509.344540 | -509.386170 | -509.383151 |
| IV <sub>1c</sub> | -609.502760 | 0.089278 | 0.009433 | 382.702600 | 0.043459 | -609.404050 | -609.447510 | -609.444491 |
| IV <sub>1d</sub> | -419.302104 | 0.161592 | 0.009413 | 375.254300 | 0.042614 | -419.131100 | -419.173710 | -419.170691 |
| IV <sub>1e</sub> | -459.052939 | 0.205290 | 0.010448 | 392.788100 | 0.044605 | -458.837200 | -458.881810 | -458.878791 |
| IV <sub>2b</sub> | -548.757843 | 0.115226 | 0.010146 | 396.021400 | 0.044972 | -548.632470 | -548.677440 | -548.674421 |
| IV <sub>2c</sub> | -648.818171 | 0.117121 | 0.011081 | 413.743100 | 0.046984 | -648.689970 | -648.736950 | -648.733931 |
| IV <sub>2d</sub> | -458.609306 | 0.189484 | 0.011141 | 409.977500 | 0.046557 | -458.408680 | -458.455240 | -458.452221 |
| IV <sub>2e</sub> | -498.364155 | 0.233657 | 0.012011 | 421.761200 | 0.047895 | -498.118490 | -498.166380 | -498.163361 |
| IV <sub>3b</sub> | -548.760172 | 0.114963 | 0.010262 | 399.529800 | 0.045370 | -548.634950 | -548.680320 | -548.677301 |
| IV <sub>3c</sub> | -648.820000 | 0.116883 | 0.011182 | 416.611900 | 0.047310 | -648.691940 | -648.739250 | -648.736231 |
| IV <sub>3d</sub> | -458.610391 | 0.189449 | 0.011122 | 409.315600 | 0.046482 | -458.409820 | -458.456300 | -458.453281 |
| IV <sub>3e</sub> | -498.369041 | 0.233178 | 0.012225 | 427.494700 | 0.048546 | -498.123640 | -498.172180 | -498.169161 |

**Table S200. Energies of IV<sub>[1-3][b-e]</sub> in SMD MeCN.** Entropy given in J/mol.K. All other quantities given in Hartree.

| Species          | DFT Energy  | ZPVE     | TC       | S          | TS       | H           | G           | G(MeCN)     |
|------------------|-------------|----------|----------|------------|----------|-------------|-------------|-------------|
| IV <sub>1b</sub> | -509.442045 | 0.086979 | 0.008560 | 366.626800 | 0.041634 | -509.346510 | -509.388140 | -509.385121 |
| IV <sub>1c</sub> | -609.510781 | 0.089275 | 0.009434 | 383.069500 | 0.043501 | -609.412070 | -609.455570 | -609.452551 |
| IV <sub>1d</sub> | -419.303064 | 0.161600 | 0.009402 | 375.064600 | 0.042592 | -419.132060 | -419.174650 | -419.171631 |
| IV <sub>1e</sub> | -459.062000 | 0.205310 | 0.010459 | 393.161500 | 0.044647 | -458.846230 | -458.890880 | -458.887861 |
| IV <sub>2b</sub> | -548.759819 | 0.115333 | 0.010070 | 394.203600 | 0.044765 | -548.634420 | -548.679180 | -548.676161 |
| IV <sub>2c</sub> | -648.825591 | 0.117112 | 0.011077 | 413.610400 | 0.046969 | -648.697400 | -648.744370 | -648.741351 |
| IV <sub>2d</sub> | -458.609969 | 0.189509 | 0.011124 | 409.768500 | 0.046533 | -458.409340 | -458.455870 | -458.452851 |
| IV <sub>2e</sub> | -498.373967 | 0.233579 | 0.012114 | 425.042400 | 0.048267 | -498.128270 | -498.176540 | -498.173521 |
| IV <sub>3b</sub> | -548.761573 | 0.114894 | 0.010273 | 399.813600 | 0.045403 | -548.636410 | -548.681810 | -548.678791 |
| IV <sub>3c</sub> | -648.827513 | 0.116863 | 0.011174 | 416.436600 | 0.047290 | -648.699480 | -648.746770 | -648.743751 |
| IV <sub>3d</sub> | -458.611384 | 0.189427 | 0.011118 | 409.238900 | 0.046473 | -458.410840 | -458.457310 | -458.454291 |
| IV <sub>3e</sub> | -498.377519 | 0.233267 | 0.012209 | 427.265200 | 0.048520 | -498.132040 | -498.180560 | -498.177541 |

**Table S201. Energies of IV<sub>[1-3][b-e]</sub> in SMD Water.** Entropy given in J/mol.K. All other quantities given in Hartree.

| Species          | DFT Energy  | ZPVE     | TC       | S          | TS       | H           | G           | G(Water)    |
|------------------|-------------|----------|----------|------------|----------|-------------|-------------|-------------|
| IV <sub>1b</sub> | -509.434003 | 0.086659 | 0.008590 | 367.054000 | 0.041682 | -509.338750 | -509.380440 | -509.377421 |
| IV <sub>1c</sub> | -609.503227 | 0.088869 | 0.009476 | 383.781800 | 0.043582 | -609.404880 | -609.448460 | -609.445441 |
| IV <sub>1d</sub> | -419.297435 | 0.161825 | 0.009333 | 373.442400 | 0.042408 | -419.126280 | -419.168690 | -419.165671 |
| IV <sub>1e</sub> | -459.050868 | 0.205202 | 0.010469 | 393.148700 | 0.044646 | -458.835200 | -458.879840 | -458.876821 |
| IV <sub>2b</sub> | -548.751669 | 0.114973 | 0.010152 | 395.766100 | 0.044943 | -548.626540 | -548.671490 | -548.668471 |
| IV <sub>2c</sub> | -648.817831 | 0.116834 | 0.011108 | 413.943100 | 0.047007 | -648.689890 | -648.736900 | -648.733881 |
| IV <sub>2d</sub> | -458.602932 | 0.189787 | 0.011043 | 407.748500 | 0.046304 | -458.402100 | -458.448410 | -458.445391 |
| IV <sub>2e</sub> | -498.363087 | 0.233485 | 0.012067 | 423.379100 | 0.048079 | -498.117540 | -498.165610 | -498.162591 |
| IV <sub>3b</sub> | -548.753015 | 0.114659 | 0.010311 | 400.428600 | 0.045472 | -548.628040 | -548.673520 | -548.670501 |
| IV <sub>3c</sub> | -648.819307 | 0.116696 | 0.011223 | 417.396800 | 0.047399 | -648.691390 | -648.738790 | -648.735771 |
| IV <sub>3d</sub> | -458.605457 | 0.189682 | 0.011086 | 408.595500 | 0.046400 | -458.404690 | -458.451090 | -458.448071 |
| IV <sub>3e</sub> | -498.365872 | 0.233007 | 0.012278 | 428.789500 | 0.048693 | -498.120590 | -498.169280 | -498.166261 |

**Table S202. Energies of V<sub>[1-3][b-e]</sub> in Gas.** Entropy given in J/mol.K. All other quantities given in Hartree.

| Species         | DFT Energy  | ZPVE     | TC       | S          | TS       | H           | G           | G(Gas)      |
|-----------------|-------------|----------|----------|------------|----------|-------------|-------------|-------------|
| V <sub>1b</sub> | -832.411140 | 0.084120 | 0.008551 | 364.352400 | 0.041376 | -832.318470 | -832.359845 | -832.359845 |
| V <sub>1c</sub> | -932.399520 | 0.086039 | 0.009851 | 391.590200 | 0.044469 | -932.303630 | -932.348099 | -932.348099 |
| V <sub>1d</sub> | -742.260949 | 0.158550 | 0.009780 | 384.730400 | 0.043690 | -742.092619 | -742.136309 | -742.136309 |
| V <sub>1e</sub> | -781.927113 | 0.201158 | 0.010270 | 390.383400 | 0.044332 | -781.715685 | -781.760016 | -781.760016 |
| V <sub>2b</sub> | -871.714466 | 0.112246 | 0.010423 | 402.258100 | 0.045680 | -871.591797 | -871.637477 | -871.637477 |
| V <sub>2c</sub> | -971.713650 | 0.114381 | 0.011261 | 416.698500 | 0.047320 | -971.588008 | -971.635328 | -971.635328 |
| V <sub>2d</sub> | -781.565118 | 0.186435 | 0.011420 | 415.335000 | 0.047165 | -781.367264 | -781.414429 | -781.414429 |
| V <sub>2e</sub> | -821.236131 | 0.229695 | 0.012464 | 431.601600 | 0.049012 | -820.993972 | -821.042984 | -821.042984 |
| V <sub>3b</sub> | -871.713560 | 0.112154 | 0.010677 | 409.049700 | 0.046451 | -871.590729 | -871.637180 | -871.637180 |
| V <sub>3c</sub> | -971.708444 | 0.113868 | 0.011640 | 426.938400 | 0.048483 | -971.582936 | -971.631418 | -971.631418 |
| V <sub>3d</sub> | -781.565593 | 0.186301 | 0.011594 | 419.999600 | 0.047695 | -781.367698 | -781.415393 | -781.415393 |
| V <sub>3e</sub> | -821.243135 | 0.229495 | 0.012773 | 439.516900 | 0.049911 | -821.000867 | -821.050778 | -821.050778 |

**Table S203. Energies of V<sub>[1-3][b-e]</sub> in SMD Toluene.** Entropy given in J/mol.K. All other quantities given in Hartree.

| Species         | DFT Energy  | ZPVE     | TC       | S          | TS       | H           | G           | G(Toluene)  |
|-----------------|-------------|----------|----------|------------|----------|-------------|-------------|-------------|
| V <sub>1b</sub> | -832.422049 | 0.084196 | 0.008499 | 363.228300 | 0.041248 | -832.329355 | -832.370603 | -832.367584 |
| V <sub>1c</sub> | -932.449489 | 0.086168 | 0.009782 | 390.268800 | 0.044319 | -932.353539 | -932.397858 | -932.394839 |
| V <sub>1d</sub> | -742.272669 | 0.158578 | 0.009769 | 384.390600 | 0.043651 | -742.104321 | -742.147972 | -742.144953 |
| V <sub>1e</sub> | -781.995930 | 0.201901 | 0.010871 | 403.196300 | 0.045787 | -781.783158 | -781.828945 | -781.825926 |
| V <sub>2b</sub> | -871.725060 | 0.112353 | 0.010394 | 401.996300 | 0.045650 | -871.602313 | -871.647964 | -871.644945 |
| V <sub>2c</sub> | -971.763732 | 0.114090 | 0.011425 | 421.603200 | 0.047877 | -971.638217 | -971.686094 | -971.683075 |
| V <sub>2d</sub> | -781.576968 | 0.186489 | 0.011412 | 415.168800 | 0.047146 | -781.379068 | -781.426214 | -781.423195 |
| V <sub>2e</sub> | -821.302562 | 0.230993 | 0.012279 | 427.352300 | 0.048530 | -821.059290 | -821.107820 | -821.104801 |
| V <sub>3b</sub> | -871.724215 | 0.112298 | 0.010637 | 408.011800 | 0.046334 | -871.601280 | -871.647614 | -871.644595 |
| V <sub>3c</sub> | -971.761687 | 0.114074 | 0.011577 | 425.517000 | 0.048321 | -971.636036 | -971.684357 | -971.681338 |
| V <sub>3d</sub> | -781.577892 | 0.186458 | 0.011579 | 419.862800 | 0.047679 | -781.379855 | -781.427534 | -781.424515 |
| V <sub>3e</sub> | -821.307363 | 0.230570 | 0.012505 | 432.344000 | 0.049097 | -821.064288 | -821.113385 | -821.110366 |

**Table S204. Energies of V<sub>[1-3][b-e]</sub> in SMD DCM.** Entropy given in J/mol.K. All other quantities given in Hartree.

| Species         | DFT Energy  | ZPVE     | TC       | S          | TS       | H           | G           | G(DCM)      |
|-----------------|-------------|----------|----------|------------|----------|-------------|-------------|-------------|
| V <sub>1b</sub> | -832.429082 | 0.084096 | 0.008484 | 362.851700 | 0.041205 | -832.336502 | -832.377707 | -832.374688 |
| V <sub>1c</sub> | -932.478871 | 0.086152 | 0.009794 | 391.377900 | 0.044445 | -932.382925 | -932.427370 | -932.424351 |
| V <sub>1d</sub> | -742.278831 | 0.158598 | 0.009725 | 383.379200 | 0.043536 | -742.110508 | -742.154044 | -742.151025 |
| V <sub>1e</sub> | -782.019420 | 0.202349 | 0.010127 | 388.192500 | 0.044083 | -781.806943 | -781.851026 | -781.848007 |
| V <sub>2b</sub> | -871.733211 | 0.112274 | 0.010408 | 402.817500 | 0.045744 | -871.610530 | -871.656273 | -871.653254 |
| V <sub>2c</sub> | -971.792975 | 0.113960 | 0.011435 | 421.796600 | 0.047899 | -971.667581 | -971.715480 | -971.712461 |
| V <sub>2d</sub> | -781.583606 | 0.186435 | 0.011392 | 414.783300 | 0.047102 | -781.385779 | -781.432881 | -781.429862 |
| V <sub>2e</sub> | -821.338462 | 0.230271 | 0.012473 | 432.335500 | 0.049096 | -821.095718 | -821.144813 | -821.141794 |
| V <sub>3b</sub> | -871.731874 | 0.111942 | 0.010658 | 408.441600 | 0.046382 | -871.609274 | -871.655656 | -871.652637 |
| V <sub>3c</sub> | -971.791173 | 0.113986 | 0.011619 | 426.908400 | 0.048479 | -971.665567 | -971.714047 | -971.711028 |
| V <sub>3d</sub> | -781.584629 | 0.186426 | 0.011563 | 419.726700 | 0.047664 | -781.386640 | -781.434304 | -781.431285 |
| V <sub>3e</sub> | -821.341350 | 0.230167 | 0.012654 | 437.822400 | 0.049719 | -821.098529 | -821.148248 | -821.145229 |

**Table S205. Energies of V<sub>[1-3][b-e]</sub> in SMD MeCN.** Entropy given in J/mol.K. All other quantities given in Hartree.

| Species         | DFT Energy  | ZPVE     | TC       | S          | TS       | H           | G           | G(MeCN)     |
|-----------------|-------------|----------|----------|------------|----------|-------------|-------------|-------------|
| V <sub>1b</sub> | -832.429950 | 0.084061 | 0.008482 | 362.768100 | 0.041196 | -832.337408 | -832.378604 | -832.375585 |
| V <sub>1c</sub> | -932.486547 | 0.086070 | 0.009811 | 391.948700 | 0.044509 | -932.390666 | -932.435175 | -932.432156 |
| V <sub>1d</sub> | -742.279134 | 0.158544 | 0.009729 | 383.531300 | 0.043554 | -742.110861 | -742.154414 | -742.151395 |
| V <sub>1e</sub> | -782.026725 | 0.201942 | 0.010245 | 390.560900 | 0.044352 | -781.814538 | -781.858889 | -781.855870 |
| V <sub>2b</sub> | -871.734672 | 0.112346 | 0.010315 | 400.095400 | 0.045435 | -871.612012 | -871.657446 | -871.654427 |
| V <sub>2c</sub> | -971.800168 | 0.114310 | 0.011294 | 417.961600 | 0.047463 | -971.674564 | -971.722028 | -971.719009 |
| V <sub>2d</sub> | -781.583813 | 0.186384 | 0.011398 | 414.928500 | 0.047119 | -781.386031 | -781.433150 | -781.430131 |
| V <sub>2e</sub> | -821.347518 | 0.230368 | 0.012431 | 431.396500 | 0.048989 | -821.104720 | -821.153709 | -821.150690 |
| V <sub>3b</sub> | -871.733111 | 0.111892 | 0.010660 | 408.450200 | 0.046383 | -871.610559 | -871.656942 | -871.653923 |
| V <sub>3c</sub> | -971.798797 | 0.114042 | 0.011544 | 424.679100 | 0.048226 | -971.673210 | -971.721437 | -971.718418 |
| V <sub>3d</sub> | -781.584892 | 0.186390 | 0.011575 | 420.297900 | 0.047729 | -781.386927 | -781.434656 | -781.431637 |
| V <sub>3e</sub> | -821.349720 | 0.230302 | 0.012635 | 437.585300 | 0.049692 | -821.106782 | -821.156474 | -821.153455 |

**Table S206. Energies of V<sub>[1-3][b-e]</sub> in SMD Water.** Entropy given in J/mol.K. All other quantities given in Hartree.

| Species         | DFT Energy  | ZPVE     | TC       | S          | TS       | H           | G           | G(Water)    |
|-----------------|-------------|----------|----------|------------|----------|-------------|-------------|-------------|
| V <sub>1b</sub> | -832.422162 | 0.084080 | 0.008496 | 363.055200 | 0.041228 | -832.329586 | -832.370814 | -832.367795 |
| V <sub>1c</sub> | -932.478746 | 0.086122 | 0.009808 | 391.839800 | 0.044497 | -932.382816 | -932.427313 | -932.424294 |
| V <sub>1d</sub> | -742.273250 | 0.159054 | 0.009658 | 382.043900 | 0.043385 | -742.104538 | -742.147923 | -742.144904 |
| V <sub>1e</sub> | -782.016289 | 0.202022 | 0.010273 | 391.159200 | 0.044420 | -781.803994 | -781.848414 | -781.845395 |
| V <sub>2b</sub> | -871.726385 | 0.112292 | 0.010367 | 401.115300 | 0.045550 | -871.603726 | -871.649277 | -871.646258 |
| V <sub>2c</sub> | -971.792109 | 0.114359 | 0.011299 | 417.999600 | 0.047468 | -971.666450 | -971.713918 | -971.710899 |
| V <sub>2d</sub> | -781.577177 | 0.186832 | 0.011384 | 414.905100 | 0.047116 | -781.378961 | -781.426077 | -781.423058 |
| V <sub>2e</sub> | -821.336597 | 0.230715 | 0.012370 | 430.586600 | 0.048897 | -821.093512 | -821.142409 | -821.139390 |
| V <sub>3b</sub> | -871.724044 | 0.111952 | 0.010670 | 408.579400 | 0.046398 | -871.601422 | -871.647820 | -871.644801 |
| V <sub>3c</sub> | -971.789968 | 0.114099 | 0.011556 | 424.784000 | 0.048238 | -971.664313 | -971.712551 | -971.709532 |
| V <sub>3d</sub> | -781.577897 | 0.186893 | 0.011526 | 419.883900 | 0.047682 | -781.379477 | -781.427159 | -781.424140 |
| V <sub>3e</sub> | -821.337922 | 0.230511 | 0.012630 | 437.456400 | 0.049677 | -821.094781 | -821.144458 | -821.141439 |

**Table S207. Energies of VI<sub>[1-2][b-e]</sub> in Gas.** Entropy given in J/mol.K. All other quantities given in Hartree.

| Species          | DFT Energy  | ZPVE     | TC       | S          | TS       | H           | G           | G(Gas)      |
|------------------|-------------|----------|----------|------------|----------|-------------|-------------|-------------|
| VI <sub>1b</sub> | -530.070341 | 0.150733 | 0.011021 | 412.131300 | 0.046801 | -529.908587 | -529.955388 | -529.955388 |
| VI <sub>1c</sub> | -630.056583 | 0.152520 | 0.011866 | 426.548200 | 0.048438 | -629.892197 | -629.940636 | -629.940636 |
| VI <sub>1d</sub> | -439.930684 | 0.225246 | 0.011930 | 423.576300 | 0.048101 | -439.693508 | -439.741609 | -439.738590 |
| VI <sub>1e</sub> | -479.619242 | 0.268587 | 0.013084 | 442.420800 | 0.050241 | -479.337571 | -479.387812 | -479.384793 |
| VI <sub>2b</sub> | -569.383205 | 0.178894 | 0.012511 | 442.191600 | 0.050215 | -569.191800 | -569.242015 | -569.242015 |
| VI <sub>2c</sub> | -669.373398 | 0.180708 | 0.013310 | 454.741300 | 0.051640 | -669.179381 | -669.231021 | -669.231021 |
| VI <sub>2d</sub> | -479.231997 | 0.253299 | 0.013374 | 451.438200 | 0.051265 | -478.965323 | -479.016588 | -479.013569 |
| VI <sub>2e</sub> | -518.911985 | 0.297332 | 0.014093 | 456.217900 | 0.051808 | -518.600560 | -518.652368 | -518.649349 |

**Table S208. Energies of VI<sub>[1-2][b-e]</sub> in SMD Toluene.** Entropy given in J/mol.K. All other quantities given in Hartree.

| Species          | DFT Energy  | ZPVE     | TC       | S          | TS       | H           | G           | G(Toluene)  |
|------------------|-------------|----------|----------|------------|----------|-------------|-------------|-------------|
| VI <sub>1b</sub> | -530.088139 | 0.150885 | 0.011183 | 417.869500 | 0.047453 | -529.926072 | -529.973525 | -529.970506 |
| VI <sub>1c</sub> | -630.118012 | 0.152956 | 0.011858 | 426.500800 | 0.048433 | -629.953197 | -630.001631 | -629.998612 |
| VI <sub>1d</sub> | -439.948545 | 0.225249 | 0.011991 | 425.693800 | 0.048341 | -439.711306 | -439.759647 | -439.756628 |
| VI <sub>1e</sub> | -479.685442 | 0.270623 | 0.012592 | 432.247000 | 0.049086 | -479.402228 | -479.451314 | -479.448295 |
| VI <sub>2b</sub> | -569.400765 | 0.178991 | 0.012440 | 440.059800 | 0.049973 | -569.209334 | -569.259307 | -569.256288 |
| VI <sub>2c</sub> | -669.433564 | 0.181378 | 0.013163 | 451.255100 | 0.051244 | -669.239023 | -669.290267 | -669.287248 |
| VI <sub>2d</sub> | -479.250302 | 0.253417 | 0.013355 | 450.762200 | 0.051188 | -478.983530 | -479.034718 | -479.031699 |
| VI <sub>2e</sub> | -518.980970 | 0.298616 | 0.013827 | 452.071500 | 0.051337 | -518.668526 | -518.719863 | -518.716844 |

**Table S209. Energies of VI<sub>[1-2][b-e]</sub> in SMD DCM.** Entropy given in J/mol.K. All other quantities given in Hartree.

| Species          | DFT Energy  | ZPVE     | TC       | S          | TS       | H           | G           | G(DCM)      |
|------------------|-------------|----------|----------|------------|----------|-------------|-------------|-------------|
| VI <sub>1b</sub> | -530.093562 | 0.150679 | 0.011191 | 417.783500 | 0.047443 | -529.931692 | -529.979135 | -529.976116 |
| VI <sub>1c</sub> | -630.149209 | 0.152603 | 0.011980 | 430.171400 | 0.048850 | -629.984626 | -630.033476 | -630.030457 |
| VI <sub>1d</sub> | -439.953806 | 0.225084 | 0.011966 | 424.795600 | 0.048239 | -439.716756 | -439.764995 | -439.761976 |
| VI <sub>1e</sub> | -479.714783 | 0.269393 | 0.012811 | 436.351100 | 0.049552 | -479.432578 | -479.482130 | -479.479111 |
| VI <sub>2b</sub> | -569.407412 | 0.178889 | 0.012508 | 442.378200 | 0.050236 | -569.216015 | -569.266251 | -569.263232 |
| VI <sub>2c</sub> | -669.462983 | 0.180794 | 0.013322 | 455.351000 | 0.051709 | -669.268867 | -669.320576 | -669.317557 |
| VI <sub>2d</sub> | -479.256436 | 0.253264 | 0.013360 | 450.863500 | 0.051200 | -478.989812 | -479.041012 | -479.037993 |
| VI <sub>2e</sub> | -519.013080 | 0.298116 | 0.013990 | 456.057500 | 0.051790 | -518.700975 | -518.752764 | -518.749745 |



**Table S210. Energies of VI<sub>[1-2][b-e]</sub> in SMD MeCN.** Entropy given in J/mol.K. All other quantities given in Hartree.

| Species          | DFT Energy  | ZPVE     | TC       | S          | TS       | H           | G           | G(MeCN)     |
|------------------|-------------|----------|----------|------------|----------|-------------|-------------|-------------|
| VI <sub>1b</sub> | -530.094071 | 0.150648 | 0.011184 | 417.571400 | 0.047419 | -529.932239 | -529.979658 | -529.976639 |
| VI <sub>1c</sub> | -630.157052 | 0.152633 | 0.011981 | 430.426500 | 0.048879 | -629.992439 | -630.041318 | -630.038299 |
| VI <sub>1d</sub> | -439.952770 | 0.225399 | 0.011783 | 419.862500 | 0.047679 | -439.715588 | -439.763268 | -439.760249 |
| VI <sub>1e</sub> | -479.721486 | 0.269241 | 0.012869 | 437.826300 | 0.049719 | -479.439376 | -479.489095 | -479.486076 |
| VI <sub>2b</sub> | -569.408264 | 0.178749 | 0.012539 | 443.096000 | 0.050318 | -569.216976 | -569.267293 | -569.264274 |
| VI <sub>2c</sub> | -669.469821 | 0.180603 | 0.013357 | 456.207700 | 0.051807 | -669.275862 | -669.327669 | -669.324650 |
| VI <sub>2d</sub> | -479.256423 | 0.253161 | 0.013387 | 451.826300 | 0.051309 | -478.989875 | -479.041184 | -479.038165 |
| VI <sub>2e</sub> | -519.023978 | 0.297788 | 0.014349 | 466.867400 | 0.053017 | -518.711840 | -518.764857 | -518.761838 |

**Table S211. Energies of VI<sub>[1-2][b-e]</sub> in SMD Water.** Entropy given in J/mol.K. All other quantities given in Hartree.

| Species                       | DFT Energy  | ZPVE     | TC       | S          | TS       | H           | G           | G(Water)    |
|-------------------------------|-------------|----------|----------|------------|----------|-------------|-------------|-------------|
| VI <sub>1b</sub> <sup>a</sup> | -530.096179 | 0.151495 | 0.010570 | 399.880700 | 0.045410 | -529.934114 | -529.979524 | -529.976505 |
| VI <sub>1c</sub>              | -630.144312 | 0.152833 | 0.011927 | 428.491100 | 0.048659 | -629.979551 | -630.028210 | -630.025191 |
| VI <sub>1d</sub>              | -439.941939 | 0.225943 | 0.011854 | 422.154500 | 0.047940 | -439.704142 | -439.752082 | -439.749063 |
| VI <sub>1e</sub>              | -479.705073 | 0.269234 | 0.012980 | 440.357600 | 0.050007 | -479.422860 | -479.472866 | -479.469847 |
| VI <sub>2b</sub>              | -569.394738 | 0.178874 | 0.012527 | 442.418000 | 0.050241 | -569.203336 | -569.253577 | -569.250558 |
| VI <sub>2c</sub>              | -669.456922 | 0.180901 | 0.013321 | 455.113300 | 0.051682 | -669.262700 | -669.314382 | -669.311363 |
| VI <sub>2d</sub>              | -479.245748 | 0.253860 | 0.013326 | 450.468800 | 0.051155 | -478.978562 | -479.029717 | -479.026698 |
| VI <sub>2e</sub>              | -519.007822 | 0.297931 | 0.014392 | 467.863900 | 0.053130 | -518.695499 | -518.748630 | -518.745611 |

<sup>a</sup> Forms a weak C-B interaction

**Table S213. Energies of VII<sub>[1-3][b-e]</sub> in Gas.** Entropy given in J/mol.K. All other quantities given in Hartree.

| Species                        | DFT Energy  | ZPVE     | TC       | S          | TS       | H           | G           | G(Gas)      |
|--------------------------------|-------------|----------|----------|------------|----------|-------------|-------------|-------------|
| VII <sub>1b</sub> <sup>a</sup> | -569.407084 | 0.181259 | 0.011515 | 417.823500 | 0.047448 | -569.214310 | -569.261758 | -569.261758 |
| VII <sub>1c</sub>              | -669.344882 | 0.181291 | 0.012872 | 446.783200 | 0.050736 | -669.150718 | -669.201455 | -669.201455 |
| VII <sub>1d</sub>              | -479.232991 | 0.255043 | 0.012516 | 432.806300 | 0.049149 | -478.965432 | -479.014582 | -479.014582 |
| VII <sub>1e</sub>              | -518.930405 | 0.298566 | 0.013721 | 452.078500 | 0.051338 | -518.618118 | -518.669455 | -518.669455 |
| VII <sub>2b</sub>              | -608.689063 | 0.208963 | 0.013089 | 449.264000 | 0.051018 | -608.467011 | -608.518029 | -608.518029 |
| VII <sub>2c</sub>              | -708.676864 | 0.210534 | 0.014025 | 465.654300 | 0.052879 | -708.452305 | -708.505184 | -708.505184 |
| VII <sub>2d</sub>              | -518.537382 | 0.283033 | 0.014026 | 459.427000 | 0.052172 | -518.240324 | -518.292496 | -518.292496 |
| VII <sub>2e</sub>              | -558.213713 | 0.327007 | 0.014954 | 471.412500 | 0.053533 | -557.871752 | -557.925285 | -557.925285 |
| VII <sub>3b</sub>              | -608.690618 | 0.208491 | 0.013357 | 455.853400 | 0.051766 | -608.468770 | -608.520536 | -608.520536 |
| VII <sub>3c</sub>              | -708.676873 | 0.210306 | 0.014224 | 469.916900 | 0.053363 | -708.452343 | -708.505706 | -708.505706 |
| VII <sub>3d</sub>              | -518.541624 | 0.282793 | 0.014289 | 467.579000 | 0.053098 | -518.244542 | -518.297640 | -518.297640 |
| VII <sub>3e</sub>              | -558.214197 | 0.326314 | 0.015409 | 484.233600 | 0.054989 | -557.872474 | -557.927463 | -557.927463 |

<sup>a</sup> Forms a weak C-B interaction**Table S214. Energies of VII<sub>[1-3][b-e]</sub> in SMD Toluene.** Entropy given in J/mol.K. All other quantities given in Hartree.

| Species                        | DFT Energy  | ZPVE     | TC       | S          | TS       | H           | G           | G(Toluene)  |
|--------------------------------|-------------|----------|----------|------------|----------|-------------|-------------|-------------|
| VII <sub>1b</sub> <sup>a</sup> | -569.424079 | 0.181340 | 0.011445 | 416.168100 | 0.047260 | -569.231294 | -569.278554 | -569.275535 |
| VII <sub>1c</sub>              | -669.422459 | 0.182996 | 0.012434 | 436.101200 | 0.049523 | -669.227028 | -669.276551 | -669.273532 |
| VII <sub>1d</sub>              | -479.252302 | 0.255151 | 0.012511 | 432.866100 | 0.049156 | -478.984640 | -479.033796 | -479.030777 |
| VII <sub>1e</sub>              | -518.994821 | 0.299392 | 0.013523 | 448.018400 | 0.050877 | -518.681905 | -518.732782 | -518.729763 |
| VII <sub>2b</sub>              | -608.706050 | 0.208907 | 0.013109 | 449.951900 | 0.051096 | -608.484034 | -608.535130 | -608.532111 |
| VII <sub>2c</sub>              | -708.732482 | 0.211093 | 0.013803 | 459.537100 | 0.052185 | -708.507587 | -708.559772 | -708.556753 |
| VII <sub>2d</sub>              | -518.553952 | 0.283231 | 0.014067 | 461.248100 | 0.052379 | -518.256654 | -518.309033 | -518.306014 |
| VII <sub>2e</sub>              | -558.282737 | 0.328525 | 0.014600 | 464.340300 | 0.052730 | -557.939613 | -557.992343 | -557.989324 |
| VII <sub>3b</sub>              | -608.707899 | 0.208440 | 0.013373 | 456.330200 | 0.051821 | -608.486086 | -608.537907 | -608.534888 |
| VII <sub>3c</sub>              | -708.738365 | 0.210457 | 0.014242 | 471.395700 | 0.053531 | -708.513667 | -708.567198 | -708.564179 |
| VII <sub>3d</sub>              | -518.559994 | 0.282848 | 0.014291 | 467.824900 | 0.053126 | -518.262854 | -518.315980 | -518.312961 |
| VII <sub>3e</sub>              | -558.287318 | 0.328149 | 0.015050 | 476.929500 | 0.054160 | -557.944120 | -557.998280 | -557.995261 |

<sup>a</sup> Forms a weak C-B interaction

**Table S215. Energies of VII<sub>[1-3][b-e]</sub> in SMD DCM.** Entropy given in J/mol.K. All other quantities given in Hartree.

| Species                        | DFT Energy  | ZPVE     | TC       | S          | TS       | H           | G           | G(DCM)      |
|--------------------------------|-------------|----------|----------|------------|----------|-------------|-------------|-------------|
| VII <sub>1b</sub> <sup>a</sup> | -569.432225 | 0.181032 | 0.011467 | 416.582700 | 0.047307 | -569.239726 | -569.287033 | -569.284014 |
| VII <sub>1c</sub>              | -669.456543 | 0.182455 | 0.012677 | 441.891200 | 0.050181 | -669.261410 | -669.311591 | -669.308572 |
| VII <sub>1d</sub>              | -479.259627 | 0.255148 | 0.012493 | 432.539500 | 0.049119 | -478.991986 | -479.041105 | -479.038086 |
| VII <sub>1e</sub>              | -519.023614 | 0.299110 | 0.013550 | 448.971000 | 0.050985 | -518.710955 | -518.761939 | -518.758920 |
| VII <sub>2b</sub>              | -608.712970 | 0.208628 | 0.013140 | 450.557300 | 0.051165 | -608.491202 | -608.542367 | -608.539348 |
| VII <sub>2c</sub>              | -708.766640 | 0.210651 | 0.014021 | 465.469900 | 0.052858 | -708.541967 | -708.594826 | -708.591807 |
| VII <sub>2d</sub>              | -518.561602 | 0.282959 | 0.013996 | 458.843200 | 0.052106 | -518.264647 | -518.316753 | -518.313734 |
| VII <sub>2e</sub>              | -558.316532 | 0.327466 | 0.015049 | 475.354000 | 0.053981 | -557.974017 | -558.027998 | -558.024979 |
| VII <sub>3b</sub>              | -608.715068 | 0.208141 | 0.013414 | 457.385100 | 0.051940 | -608.493514 | -608.545454 | -608.542435 |
| VII <sub>3c</sub>              | -708.768369 | 0.210160 | 0.014305 | 472.889500 | 0.053701 | -708.543903 | -708.597604 | -708.594585 |
| VII <sub>3d</sub>              | -518.566076 | 0.282663 | 0.014292 | 467.863200 | 0.053130 | -518.269121 | -518.322252 | -518.319233 |
| VII <sub>3e</sub>              | -558.322430 | 0.327509 | 0.015182 | 479.879600 | 0.054495 | -557.979739 | -558.034234 | -558.031215 |

<sup>a</sup> Forms a weak C-B interaction**Table S216. Energies of VII<sub>[1-3][b-e]</sub> in SMD MeCN.** Entropy given in J/mol.K. All other quantities given in Hartree.

| Species                        | DFT Energy  | ZPVE     | TC       | S          | TS       | H           | G           | G(MeCN)     |
|--------------------------------|-------------|----------|----------|------------|----------|-------------|-------------|-------------|
| VII <sub>1b</sub> <sup>a</sup> | -569.433008 | 0.180901 | 0.011482 | 416.881500 | 0.047341 | -569.240625 | -569.287966 | -569.284947 |
| VII <sub>1c</sub>              | -669.460437 | 0.182094 | 0.012826 | 445.834600 | 0.050629 | -669.265518 | -669.316147 | -669.313128 |
| VII <sub>1d</sub>              | -479.260401 | 0.255106 | 0.012499 | 432.687600 | 0.049136 | -478.992796 | -479.041932 | -479.038913 |
| VII <sub>1e</sub>              | -519.030046 | 0.299211 | 0.013495 | 448.045500 | 0.050880 | -518.717340 | -518.768220 | -518.765201 |
| VII <sub>2b</sub>              | -608.713694 | 0.208560 | 0.013140 | 450.533100 | 0.051162 | -608.491993 | -608.543156 | -608.540137 |
| VII <sub>2c</sub>              | -708.773626 | 0.210507 | 0.014055 | 466.478800 | 0.052973 | -708.549064 | -708.602037 | -708.599018 |
| VII <sub>2d</sub>              | -518.561576 | 0.282943 | 0.013975 | 458.425400 | 0.052058 | -518.264658 | -518.316716 | -518.313697 |
| VII <sub>2e</sub>              | -558.323058 | 0.327720 | 0.014904 | 471.127900 | 0.053501 | -557.980434 | -558.033935 | -558.030916 |
| VII <sub>3b</sub>              | -608.715912 | 0.208056 | 0.013423 | 457.634000 | 0.051969 | -608.494433 | -608.546402 | -608.543383 |
| VII <sub>3c</sub>              | -708.772724 | 0.210135 | 0.014311 | 472.316100 | 0.053636 | -708.548277 | -708.601913 | -708.598894 |
| VII <sub>3d</sub>              | -518.565967 | 0.282623 | 0.014283 | 467.595700 | 0.053100 | -518.269061 | -518.322161 | -518.319142 |
| VII <sub>3e</sub>              | -558.325663 | 0.327918 | 0.015095 | 478.336700 | 0.054320 | -557.982651 | -558.036970 | -558.033951 |

<sup>a</sup> Forms a weak C-B interaction

**Table S217. Energies of VII<sub>[1-3][b-e]</sub> in SMD Water.** Entropy given in J/mol.K. All other quantities given in Hartree.

| Species                        | DFT Energy  | ZPVE     | TC       | S          | TS       | H           | G           | G(Water)    |
|--------------------------------|-------------|----------|----------|------------|----------|-------------|-------------|-------------|
| VII <sub>1b</sub> <sup>a</sup> | -569.423142 | 0.180999 | 0.011560 | 418.752400 | 0.047553 | -569.230582 | -569.278135 | -569.275116 |
| VII <sub>1c</sub>              | -669.449587 | 0.182195 | 0.012875 | 446.691100 | 0.050726 | -669.254517 | -669.305243 | -669.302224 |
| VII <sub>1d</sub>              | -479.249931 | 0.255766 | 0.012447 | 431.770700 | 0.049032 | -478.981717 | -479.030748 | -479.027729 |
| VII <sub>1e</sub>              | -519.014436 | 0.299358 | 0.013553 | 449.147100 | 0.051005 | -518.701524 | -518.752529 | -518.749510 |
| VII <sub>2b</sub>              | -608.700350 | 0.208655 | 0.013213 | 452.174500 | 0.051349 | -608.478483 | -608.529831 | -608.526812 |
| VII <sub>2c</sub>              | -708.760608 | 0.210607 | 0.014126 | 468.175700 | 0.053166 | -708.535875 | -708.589041 | -708.586022 |
| VII <sub>2d</sub>              | -518.550828 | 0.283557 | 0.014001 | 459.626500 | 0.052195 | -518.253270 | -518.305465 | -518.302446 |
| VII <sub>2e</sub>              | -558.306529 | 0.327961 | 0.014944 | 472.111600 | 0.053613 | -557.963624 | -558.017236 | -558.014217 |
| VII <sub>3b</sub>              | -608.702365 | 0.208167 | 0.013501 | 459.456100 | 0.052175 | -608.480697 | -608.532873 | -608.529854 |
| VII <sub>3c</sub>              | -708.762103 | 0.210118 | 0.014415 | 475.560100 | 0.054004 | -708.537570 | -708.591574 | -708.588555 |
| VII <sub>3d</sub>              | -518.553925 | 0.283219 | 0.014291 | 468.046300 | 0.053151 | -518.256415 | -518.309566 | -518.306547 |
| VII <sub>3e</sub>              | -558.309646 | 0.328112 | 0.015162 | 479.905700 | 0.054498 | -557.966371 | -558.020869 | -558.017850 |

<sup>a</sup> Forms a weak C-B interaction

**Table S218. Energies of VIII<sub>[1-4][b-e]</sub> in Gas.** Entropy given in J/mol.K. All other quantities given in Hartree.

| Species                         | DFT Energy  | ZPVE     | TC       | S          | TS       | H           | G           | G(Gas)      |
|---------------------------------|-------------|----------|----------|------------|----------|-------------|-------------|-------------|
| VIII <sub>1b</sub> <sup>a</sup> | -552.110754 | 0.166580 | 0.011490 | 413.904400 | 0.047003 | -551.932683 | -551.979686 | -551.979686 |
| VIII <sub>1c</sub>              | -652.072855 | 0.167091 | 0.012150 | 429.845700 | 0.048813 | -651.893614 | -651.942427 | -651.942427 |
| VIII <sub>1d</sub>              | -461.948324 | 0.240426 | 0.012711 | 434.600500 | 0.049353 | -461.695187 | -461.744540 | -461.744540 |
| VIII <sub>1e</sub>              | -501.630443 | 0.283380 | 0.013931 | 454.330900 | 0.051593 | -501.333133 | -501.384726 | -501.384726 |
| VIII <sub>2b</sub>              | -591.410093 | 0.194369 | 0.013360 | 451.949200 | 0.051323 | -591.202364 | -591.253687 | -591.253687 |
| VIII <sub>2c</sub>              | -691.404218 | 0.196316 | 0.014177 | 465.749100 | 0.052890 | -691.193724 | -691.246614 | -691.246614 |
| VIII <sub>2d</sub>              | -501.262418 | 0.268657 | 0.014331 | 464.512300 | 0.052750 | -500.979430 | -501.032180 | -501.032180 |
| VIII <sub>2e</sub>              | -540.936232 | 0.311809 | 0.015418 | 480.880900 | 0.054608 | -540.609005 | -540.663614 | -540.663614 |
| VIII <sub>3b</sub>              | -591.410812 | 0.194535 | 0.013390 | 452.516200 | 0.051387 | -591.202886 | -591.254274 | -591.254274 |
| VIII <sub>3c</sub>              | -691.397864 | 0.196169 | 0.014281 | 467.058100 | 0.053039 | -691.187414 | -691.240453 | -691.240453 |
| VIII <sub>3d</sub>              | -501.261022 | 0.268716 | 0.014319 | 463.451300 | 0.052629 | -500.977987 | -501.030617 | -501.030617 |
| VIII <sub>3e</sub>              | -540.940021 | 0.312042 | 0.015483 | 482.836800 | 0.054831 | -540.612495 | -540.667326 | -540.667326 |
| VIII <sub>4b</sub>              | -552.097777 | 0.166203 | 0.011912 | 424.986200 | 0.048261 | -551.919661 | -551.967922 | -551.967922 |
| VIII <sub>4c</sub>              | -652.066269 | 0.167392 | 0.012880 | 443.161800 | 0.050325 | -651.885996 | -651.936321 | -651.936321 |
| VIII <sub>4d</sub>              | -461.945292 | 0.240418 | 0.012922 | 438.868100 | 0.049838 | -461.691951 | -461.741789 | -461.741789 |
| VIII <sub>4e</sub>              | -501.636373 | 0.284475 | 0.013780 | 449.789600 | 0.051078 | -501.338118 | -501.389196 | -501.389196 |

<sup>a</sup> Forms a weak C-B interaction**Table S219. Energies of VIII<sub>[1-4][b-e]</sub> in SMD Toluene.** Entropy given in J/mol.K. All other quantities given in Hartree.

| Species                         | DFT Energy  | ZPVE     | TC       | S          | TS       | H           | G           | G(Toluene)  |
|---------------------------------|-------------|----------|----------|------------|----------|-------------|-------------|-------------|
| VIII <sub>1b</sub> <sup>a</sup> | -552.124212 | 0.166717 | 0.011415 | 412.411100 | 0.046833 | -551.946081 | -551.992914 | -551.989895 |
| VIII <sub>1c</sub>              | -652.143586 | 0.168514 | 0.012625 | 437.853300 | 0.049722 | -651.962447 | -652.012169 | -652.009150 |
| VIII <sub>1d</sub>              | -461.959114 | 0.240115 | 0.012843 | 437.531300 | 0.049686 | -461.706155 | -461.755841 | -461.752822 |
| VIII <sub>1e</sub>              | -501.695562 | 0.284497 | 0.013614 | 448.280200 | 0.050906 | -501.397452 | -501.448358 | -501.445339 |
| VIII <sub>2b</sub>              | -591.423369 | 0.194311 | 0.013375 | 452.724900 | 0.051411 | -591.215682 | -591.267093 | -591.264074 |
| VIII <sub>2c</sub>              | -691.458196 | 0.196861 | 0.014048 | 463.060700 | 0.052585 | -691.247287 | -691.299872 | -691.296853 |
| VIII <sub>2d</sub>              | -501.276274 | 0.268672 | 0.014325 | 464.736000 | 0.052775 | -500.993276 | -501.046052 | -501.043033 |
| VIII <sub>2e</sub>              | -540.998524 | 0.313264 | 0.015297 | 479.440200 | 0.054445 | -540.669964 | -540.724408 | -540.721389 |
| VIII <sub>3b</sub>              | -591.423907 | 0.194710 | 0.013287 | 450.461900 | 0.051154 | -591.215910 | -591.267064 | -591.264045 |
| VIII <sub>3c</sub>              | -691.455424 | 0.196280 | 0.014281 | 468.131000 | 0.053161 | -691.244862 | -691.298023 | -691.295004 |
| VIII <sub>3d</sub>              | -501.275046 | 0.268764 | 0.014316 | 463.573600 | 0.052643 | -500.991966 | -501.044609 | -501.041590 |
| VIII <sub>3e</sub>              | -541.005702 | 0.315237 | 0.014591 | 463.597100 | 0.052646 | -540.675873 | -540.728519 | -540.725500 |
| VIII <sub>4b</sub>              | -552.109772 | 0.166115 | 0.011941 | 426.543900 | 0.048438 | -551.931716 | -551.980154 | -551.977135 |
| VIII <sub>4c</sub>              | -652.135584 | 0.168482 | 0.012671 | 438.259700 | 0.049768 | -651.954431 | -652.004199 | -652.001180 |
| VIII <sub>4d</sub>              | -461.958991 | 0.240560 | 0.012872 | 437.931500 | 0.049731 | -461.705560 | -461.755291 | -461.752272 |
| VIII <sub>4e</sub>              | -501.693100 | 0.285247 | 0.013708 | 449.794000 | 0.051078 | -501.394146 | -501.445224 | -501.442205 |

<sup>a</sup> Forms a weak C-B interaction

**Table S220. Energies of VIII<sub>[1-4][b-e]</sub> in SMD DCM.** Entropy given in J/mol.K. All other quantities given in Hartree.

| Species                         | DFT Energy  | ZPVE     | TC       | S          | TS       | H           | G           | G(DCM)      |
|---------------------------------|-------------|----------|----------|------------|----------|-------------|-------------|-------------|
| VIII <sub>1b</sub> <sup>a</sup> | -552.131603 | 0.166392 | 0.011413 | 412.240600 | 0.046814 | -551.953798 | -552.000612 | -551.997593 |
| VIII <sub>1c</sub>              | -652.174601 | 0.168086 | 0.012679 | 439.329400 | 0.049890 | -651.993837 | -652.043727 | -652.040708 |
| VIII <sub>1d</sub>              | -461.970836 | 0.240225 | 0.012705 | 434.452700 | 0.049336 | -461.717906 | -461.767242 | -461.764223 |
| VIII <sub>1e</sub>              | -501.727883 | 0.284258 | 0.013706 | 450.131200 | 0.051117 | -501.429919 | -501.481036 | -501.478017 |
| VIII <sub>2b</sub>              | -591.431557 | 0.194479 | 0.013174 | 447.960200 | 0.050870 | -591.223904 | -591.274774 | -591.271755 |
| VIII <sub>2c</sub>              | -691.487974 | 0.196353 | 0.014157 | 465.494100 | 0.052861 | -691.277463 | -691.330324 | -691.327305 |
| VIII <sub>2d</sub>              | -501.280940 | 0.268299 | 0.014350 | 465.471000 | 0.052859 | -500.998291 | -501.051149 | -501.048130 |
| VIII <sub>2e</sub>              | -541.038419 | 0.312891 | 0.015192 | 477.400600 | 0.054213 | -540.710336 | -540.764549 | -540.761530 |
| VIII <sub>3b</sub>              | -591.431826 | 0.194619 | 0.013232 | 449.325600 | 0.051025 | -591.223975 | -591.275000 | -591.271981 |
| VIII <sub>3c</sub>              | -691.486845 | 0.196158 | 0.014318 | 469.446300 | 0.053310 | -691.276370 | -691.329680 | -691.326661 |
| VIII <sub>3d</sub>              | -501.281429 | 0.268461 | 0.014337 | 464.030600 | 0.052695 | -500.998631 | -501.051326 | -501.048307 |
| VIII <sub>3e</sub>              | -541.039454 | 0.313757 | 0.014969 | 471.798200 | 0.053577 | -540.710727 | -540.764304 | -540.761285 |
| VIII <sub>4b</sub>              | -552.116818 | 0.165959 | 0.011938 | 426.501700 | 0.048433 | -551.938921 | -551.987354 | -551.984335 |
| VIII <sub>4c</sub>              | -652.168594 | 0.167887 | 0.012847 | 442.696800 | 0.050272 | -651.987860 | -652.038132 | -652.035113 |
| VIII <sub>4d</sub>              | -461.965448 | 0.240339 | 0.012865 | 437.083000 | 0.049635 | -461.712244 | -461.761879 | -461.758860 |
| VIII <sub>4e</sub>              | -501.727790 | 0.284676 | 0.013742 | 449.762000 | 0.051075 | -501.429372 | -501.480446 | -501.477427 |

<sup>a</sup> Forms a weak C-B interaction**Table S221. Energies of VIII<sub>[1-4][b-e]</sub> in SMD MeCN.** Entropy given in J/mol.K. All other quantities given in Hartree.

| Species                         | DFT Energy  | ZPVE     | TC       | S          | TS       | H           | G           | G(MeCN)     |
|---------------------------------|-------------|----------|----------|------------|----------|-------------|-------------|-------------|
| VIII <sub>1b</sub> <sup>a</sup> | -552.132048 | 0.166273 | 0.011415 | 412.217100 | 0.046811 | -551.954360 | -552.001171 | -551.998152 |
| VIII <sub>1c</sub>              | -652.178357 | 0.167620 | 0.012022 | 426.951800 | 0.048484 | -651.998715 | -652.047199 | -652.044180 |
| VIII <sub>1d</sub>              | -461.971298 | 0.240247 | 0.012686 | 434.062200 | 0.049292 | -461.718366 | -461.767657 | -461.764638 |
| VIII <sub>1e</sub>              | -501.735282 | 0.284240 | 0.013708 | 450.367400 | 0.051143 | -501.437335 | -501.488479 | -501.485460 |
| VIII <sub>2b</sub>              | -591.432468 | 0.194341 | 0.013183 | 448.136400 | 0.050890 | -591.224943 | -591.275833 | -591.272814 |
| VIII <sub>2c</sub>              | -691.496618 | 0.196175 | 0.014152 | 465.266800 | 0.052835 | -691.286291 | -691.339126 | -691.336107 |
| VIII <sub>2d</sub>              | -501.282125 | 0.268311 | 0.014292 | 463.759400 | 0.052664 | -500.999522 | -501.052186 | -501.049167 |
| VIII <sub>2e</sub>              | -541.046635 | 0.312838 | 0.015207 | 477.529600 | 0.054228 | -540.718591 | -540.772819 | -540.769800 |
| VIII <sub>3b</sub>              | -591.432715 | 0.194487 | 0.013251 | 449.653900 | 0.051062 | -591.224977 | -591.276039 | -591.273020 |
| VIII <sub>3c</sub>              | -691.494156 | 0.196152 | 0.014300 | 469.177100 | 0.053279 | -691.283704 | -691.336983 | -691.333964 |
| VIII <sub>3d</sub>              | -501.281261 | 0.268386 | 0.014324 | 463.676900 | 0.052655 | -500.998551 | -501.051206 | -501.048187 |
| VIII <sub>3e</sub>              | -541.042964 | 0.313273 | 0.015150 | 474.867400 | 0.053926 | -540.714541 | -540.768467 | -540.765448 |
| VIII <sub>4b</sub>              | -552.118030 | 0.165854 | 0.011904 | 424.897800 | 0.048251 | -551.940273 | -551.988524 | -551.985505 |
| VIII <sub>4c</sub>              | -652.176581 | 0.167943 | 0.012801 | 441.588200 | 0.050146 | -651.995837 | -652.045983 | -652.042964 |
| VIII <sub>4d</sub>              | -461.965789 | 0.240334 | 0.012839 | 436.421600 | 0.049560 | -461.712616 | -461.762176 | -461.759157 |
| VIII <sub>4e</sub>              | -501.729851 | 0.285387 | 0.013565 | 447.019700 | 0.050763 | -501.430899 | -501.481662 | -501.478643 |

<sup>a</sup> Forms a weak C-B interaction

**Table S222. Energies of VIII<sub>[1-4][b-e]</sub> in SMD Water.** Entropy given in J/mol.K. All other quantities given in Hartree.

| Species                         | DFT Energy  | ZPVE     | TC       | S          | TS       | H           | G           | G(Water)    |
|---------------------------------|-------------|----------|----------|------------|----------|-------------|-------------|-------------|
| VIII <sub>1b</sub> <sup>a</sup> | -552.122280 | 0.166318 | 0.011433 | 412.536400 | 0.046847 | -551.944529 | -551.991376 | -551.988357 |
| VIII <sub>1c</sub>              | -652.172421 | 0.168165 | 0.012664 | 438.985600 | 0.049851 | -651.991591 | -652.041442 | -652.038423 |
| VIII <sub>1d</sub>              | -461.963742 | 0.240897 | 0.012611 | 432.710300 | 0.049138 | -461.710235 | -461.759373 | -461.756354 |
| VIII <sub>1e</sub>              | -501.721968 | 0.284459 | 0.013686 | 449.879400 | 0.051088 | -501.423824 | -501.474912 | -501.471893 |
| VIII <sub>2b</sub>              | -591.422020 | 0.194433 | 0.013191 | 448.210800 | 0.050898 | -591.214397 | -591.265295 | -591.262276 |
| VIII <sub>2c</sub>              | -691.484569 | 0.196343 | 0.014154 | 465.181100 | 0.052826 | -691.274072 | -691.326897 | -691.323878 |
| VIII <sub>2d</sub>              | -501.272476 | 0.268905 | 0.014271 | 463.948000 | 0.052686 | -500.989300 | -501.041986 | -501.038967 |
| VIII <sub>2e</sub>              | -541.033427 | 0.313027 | 0.015189 | 477.068200 | 0.054176 | -540.705211 | -540.759387 | -540.756368 |
| VIII <sub>3b</sub>              | -591.421884 | 0.194503 | 0.013289 | 450.354100 | 0.051142 | -591.214092 | -591.265234 | -591.262215 |
| VIII <sub>3c</sub>              | -691.482528 | 0.196296 | 0.014284 | 467.647900 | 0.053106 | -691.271948 | -691.325054 | -691.322035 |
| VIII <sub>3d</sub>              | -501.270395 | 0.269132 | 0.014257 | 463.695700 | 0.052657 | -500.987006 | -501.039663 | -501.036644 |
| VIII <sub>3e</sub>              | -541.029666 | 0.313420 | 0.015167 | 475.104000 | 0.053952 | -540.701079 | -540.755031 | -540.752012 |
| VIII <sub>4b</sub>              | -552.107330 | 0.165977 | 0.011958 | 426.928500 | 0.048482 | -551.929395 | -551.977877 | -551.974858 |
| VIII <sub>4c</sub>              | -652.167048 | 0.168016 | 0.012813 | 441.719500 | 0.050161 | -651.986219 | -652.036380 | -652.033361 |
| VIII <sub>4d</sub>              | -461.957173 | 0.241073 | 0.012681 | 433.075900 | 0.049180 | -461.703420 | -461.752599 | -461.749580 |
| VIII <sub>4e</sub>              | -501.721528 | 0.284974 | 0.013700 | 448.756900 | 0.050960 | -501.422854 | -501.473815 | -501.470796 |

<sup>a</sup> Forms a weak C-B interaction

**Table S223. Energies of IX<sub>[1-2,4][b-e]</sub> in Gas.** Entropy given in J/mol.K. All other quantities given in Hartree.

| Species          | DFT Energy  | ZPVE     | TC       | S          | TS       | H           | G           | G(Gas)      |
|------------------|-------------|----------|----------|------------|----------|-------------|-------------|-------------|
| IX <sub>1b</sub> | -544.916142 | 0.116756 | 0.010145 | 398.144100 | 0.045213 | -544.789241 | -544.834454 | -544.834454 |
| IX <sub>1c</sub> | -644.913916 | 0.118645 | 0.011022 | 412.739300 | 0.046870 | -644.784250 | -644.831120 | -644.831120 |
| IX <sub>1d</sub> | -454.769821 | 0.190799 | 0.011029 | 408.302800 | 0.046367 | -454.567992 | -454.614359 | -454.614359 |
| IX <sub>1e</sub> | -494.447174 | 0.233723 | 0.012207 | 427.351700 | 0.048530 | -494.201244 | -494.249773 | -494.249773 |
| IX <sub>2b</sub> | -584.233074 | 0.144822 | 0.011793 | 429.569000 | 0.048782 | -584.076460 | -584.125241 | -584.125241 |
| IX <sub>2c</sub> | -684.228394 | 0.146682 | 0.012516 | 438.611800 | 0.049808 | -684.069195 | -684.119004 | -684.119004 |
| IX <sub>2d</sub> | -494.084483 | 0.218913 | 0.012739 | 440.449300 | 0.050017 | -493.852831 | -493.902848 | -493.902848 |
| IX <sub>2e</sub> | -533.757736 | 0.261961 | 0.013956 | 459.852800 | 0.052221 | -533.481819 | -533.534039 | -533.534039 |
| IX <sub>4b</sub> | -544.915717 | 0.116754 | 0.010187 | 399.999300 | 0.045424 | -544.788776 | -544.834200 | -544.834200 |
| IX <sub>4c</sub> | -644.895527 | 0.118117 | 0.011121 | 416.614800 | 0.047310 | -644.766288 | -644.813599 | -644.813599 |
| IX <sub>4d</sub> | -454.770402 | 0.190715 | 0.011139 | 411.378200 | 0.046716 | -454.568548 | -454.615264 | -454.615264 |
| IX <sub>4e</sub> | -494.455551 | 0.233905 | 0.012242 | 428.663200 | 0.048679 | -494.209404 | -494.258083 | -494.258083 |

**Table S224. Energies of IX<sub>[1-2,4][b-e]</sub> in SMD Toluene.** Entropy given in J/mol.K. All other quantities given in Hartree.

| Species          | DFT Energy  | ZPVE     | TC       | S          | TS       | H           | G           | G(Toluene)  |
|------------------|-------------|----------|----------|------------|----------|-------------|-------------|-------------|
| IX <sub>1b</sub> | -544.932365 | 0.116674 | 0.010149 | 398.768800 | 0.045284 | -544.805543 | -544.850826 | -544.847807 |
| IX <sub>1c</sub> | -644.973554 | 0.118721 | 0.010972 | 411.392000 | 0.046717 | -644.843861 | -644.890579 | -644.887560 |
| IX <sub>1d</sub> | -454.790825 | 0.190686 | 0.011042 | 408.461200 | 0.046385 | -454.589097 | -454.635482 | -454.632463 |
| IX <sub>1e</sub> | -494.519048 | 0.234353 | 0.012054 | 424.735400 | 0.048233 | -494.272640 | -494.320873 | -494.317854 |
| IX <sub>2b</sub> | -584.250808 | 0.144668 | 0.011825 | 430.880400 | 0.048930 | -584.094316 | -584.143246 | -584.140227 |
| IX <sub>2c</sub> | -684.287912 | 0.147496 | 0.012321 | 435.380100 | 0.049441 | -684.128095 | -684.177537 | -684.174518 |
| IX <sub>2d</sub> | -494.102826 | 0.218978 | 0.012721 | 440.033700 | 0.049970 | -493.871126 | -493.921096 | -493.918077 |
| IX <sub>2e</sub> | -533.828356 | 0.262824 | 0.013767 | 456.609100 | 0.051852 | -533.551765 | -533.603617 | -533.600598 |
| IX <sub>4b</sub> | -544.933788 | 0.116457 | 0.010133 | 397.832700 | 0.045178 | -544.807198 | -544.852376 | -544.849357 |
| IX <sub>4c</sub> | -644.963519 | 0.118621 | 0.010249 | 399.653300 | 0.045384 | -644.834650 | -644.880034 | -644.877015 |
| IX <sub>4d</sub> | -454.791063 | 0.190727 | 0.011093 | 410.037100 | 0.046564 | -454.589242 | -454.635806 | -454.632787 |
| IX <sub>4e</sub> | -494.512556 | 0.234371 | 0.011581 | 415.645700 | 0.047200 | -494.266604 | -494.313805 | -494.310786 |



**Table S225. Energies of IX<sub>[1-2,4][b-e]</sub> in SMD DCM.** Entropy given in J/mol.K. All other quantities given in Hartree.

| Species          | DFT Energy  | ZPVE     | TC       | S          | TS       | H           | G           | G(DCM)      |
|------------------|-------------|----------|----------|------------|----------|-------------|-------------|-------------|
| IX <sub>1b</sub> | -544.939520 | 0.116305 | 0.010117 | 397.249800 | 0.045111 | -544.813098 | -544.858210 | -544.855191 |
| IX <sub>1c</sub> | -645.001452 | 0.118624 | 0.010989 | 412.849800 | 0.046883 | -644.871839 | -644.918722 | -644.915703 |
| IX <sub>1d</sub> | -454.797947 | 0.190689 | 0.011018 | 407.910600 | 0.046322 | -454.596240 | -454.642562 | -454.639543 |
| IX <sub>1e</sub> | -494.552483 | 0.234417 | 0.012065 | 424.836700 | 0.048244 | -494.306000 | -494.354245 | -494.351226 |
| IX <sub>2b</sub> | -584.258190 | 0.144602 | 0.011658 | 424.795200 | 0.048239 | -584.101929 | -584.150169 | -584.147150 |
| IX <sub>2c</sub> | -684.318658 | 0.146753 | 0.012569 | 441.545800 | 0.050142 | -684.159336 | -684.209478 | -684.206459 |
| IX <sub>2d</sub> | -494.108622 | 0.218793 | 0.012720 | 440.501300 | 0.050023 | -493.877109 | -493.927132 | -493.924113 |
| IX <sub>2e</sub> | -533.862894 | 0.263071 | 0.013490 | 449.580400 | 0.051054 | -533.586333 | -533.637387 | -533.634368 |
| IX <sub>4b</sub> | -544.940307 | 0.116264 | 0.010152 | 398.139100 | 0.045212 | -544.813892 | -544.859104 | -544.856085 |
| IX <sub>4c</sub> | -644.998180 | 0.118412 | 0.011073 | 415.647400 | 0.047201 | -644.868695 | -644.915896 | -644.912877 |
| IX <sub>4d</sub> | -454.797718 | 0.190673 | 0.011076 | 409.889800 | 0.046547 | -454.595969 | -454.642516 | -454.639497 |
| IX <sub>4e</sub> | -494.555151 | 0.234341 | 0.012152 | 426.933100 | 0.048482 | -494.308658 | -494.357140 | -494.354121 |

**Table S226. Energies of IX<sub>[1-2,4][b-e]</sub> in SMD MeCN.** Entropy given in J/mol.K. All other quantities given in Hartree.

| Species          | DFT Energy  | ZPVE     | TC       | S          | TS       | H           | G           | G(MeCN)     |
|------------------|-------------|----------|----------|------------|----------|-------------|-------------|-------------|
| IX <sub>1b</sub> | -544.940971 | 0.116268 | 0.010121 | 397.420600 | 0.045131 | -544.814582 | -544.859713 | -544.856694 |
| IX <sub>1c</sub> | -645.008861 | 0.118500 | 0.011023 | 413.986500 | 0.047012 | -644.879339 | -644.926351 | -644.923332 |
| IX <sub>1d</sub> | -454.798912 | 0.190766 | 0.010998 | 407.541700 | 0.046280 | -454.597149 | -454.643429 | -454.640410 |
| IX <sub>1e</sub> | -494.560869 | 0.234602 | 0.012031 | 424.175100 | 0.048169 | -494.314236 | -494.362405 | -494.359386 |
| IX <sub>2b</sub> | -584.259491 | 0.144542 | 0.011665 | 424.941500 | 0.048256 | -584.103284 | -584.151540 | -584.148521 |
| IX <sub>2c</sub> | -684.326168 | 0.146646 | 0.012595 | 442.292600 | 0.050226 | -684.166927 | -684.217154 | -684.214135 |
| IX <sub>2d</sub> | -494.108651 | 0.218819 | 0.012677 | 439.243700 | 0.049880 | -493.877156 | -493.927036 | -493.924017 |
| IX <sub>2e</sub> | -533.871205 | 0.263237 | 0.013499 | 450.365800 | 0.051143 | -533.594470 | -533.645613 | -533.642594 |
| IX <sub>4b</sub> | -544.941473 | 0.116258 | 0.010153 | 398.205400 | 0.045220 | -544.815062 | -544.860282 | -544.857263 |
| IX <sub>4c</sub> | -645.007365 | 0.118182 | 0.010330 | 400.972800 | 0.045534 | -644.878853 | -644.924388 | -644.921369 |
| IX <sub>4d</sub> | -454.798438 | 0.190630 | 0.011068 | 409.801700 | 0.046537 | -454.596741 | -454.643277 | -454.640258 |
| IX <sub>4e</sub> | -494.562154 | 0.234431 | 0.012110 | 426.171800 | 0.048396 | -494.315613 | -494.364009 | -494.360990 |

**Table S227. Energies of IX<sub>[1-2,4][b-e]</sub> in SMD Water.** Entropy given in J/mol.K. All other quantities given in Hartree.

| Species          | DFT Energy  | ZPVE     | TC       | S          | TS       | H           | G           | G(Water)    |
|------------------|-------------|----------|----------|------------|----------|-------------|-------------|-------------|
| IX <sub>1b</sub> | -544.926678 | 0.116383 | 0.010134 | 397.134200 | 0.045098 | -544.800161 | -544.845259 | -544.842240 |
| IX <sub>1c</sub> | -644.995529 | 0.118641 | 0.011010 | 413.462800 | 0.046953 | -644.865878 | -644.912831 | -644.909812 |
| IX <sub>1d</sub> | -454.787900 | 0.191478 | 0.010913 | 405.949600 | 0.046099 | -454.585509 | -454.631608 | -454.628589 |
| IX <sub>1e</sub> | -494.545289 | 0.235006 | 0.011958 | 422.284700 | 0.047954 | -494.298325 | -494.346279 | -494.343260 |
| IX <sub>2b</sub> | -584.246910 | 0.144552 | 0.011687 | 425.239700 | 0.048290 | -584.090671 | -584.138961 | -584.135942 |
| IX <sub>2c</sub> | -684.313866 | 0.146651 | 0.012634 | 443.159400 | 0.050325 | -684.154581 | -684.204906 | -684.201887 |
| IX <sub>2d</sub> | -494.096968 | 0.219451 | 0.012581 | 437.308400 | 0.049660 | -493.864936 | -493.914596 | -493.911577 |
| IX <sub>2e</sub> | -533.855564 | 0.263333 | 0.013522 | 450.792800 | 0.051192 | -533.578709 | -533.629900 | -533.626881 |
| IX <sub>4b</sub> | -544.926239 | 0.116058 | 0.009455 | 384.499900 | 0.043664 | -544.800727 | -544.844390 | -544.841371 |
| IX <sub>4c</sub> | -644.993313 | 0.118311 | 0.010346 | 401.287000 | 0.045570 | -644.864656 | -644.910226 | -644.907207 |
| IX <sub>4d</sub> | -454.787540 | 0.191046 | 0.010283 | 394.255800 | 0.044771 | -454.586211 | -454.630982 | -454.627963 |
| IX <sub>4e</sub> | -494.529775 | 0.234316 | 0.011653 | 417.300000 | 0.047388 | -494.283806 | -494.331194 | -494.328175 |

**Table S228. Orbital Energies and Philicity Parameters of I<sub>[1-2][b-e]</sub> in Gas.** All quantities given in eV.

| Species                      | HOMO       | LUMO      | CHI      | ETA      | GEI      | N         | ΔGEI                                | ΔN                                |
|------------------------------|------------|-----------|----------|----------|----------|-----------|-------------------------------------|-----------------------------------|
| I <sub>1b</sub> <sup>a</sup> | -8.740843  | -0.448716 | 4.594779 | 8.292127 | 1.273015 | 2.182626  |                                     |                                   |
| I <sub>1c</sub>              | -4.004972  | 1.854728  | 1.075122 | 5.859701 | 0.098630 | 6.918496  | -1.174384<br>(-0.8946) <sup>b</sup> | 4.735870<br>(3.4354) <sup>b</sup> |
| I <sub>1d</sub>              | -7.426533  | -0.216603 | 3.821568 | 7.209930 | 1.012796 | 3.496936  |                                     |                                   |
| I <sub>1e</sub>              | -11.395586 | -3.444418 | 7.420002 | 7.951168 | 3.462160 | -0.472118 | 2.449363                            | -3.969053                         |
| I <sub>2b</sub>              | -7.462179  | -0.371708 | 3.916944 | 7.090472 | 1.081906 | 3.461289  |                                     |                                   |
| I <sub>2c</sub>              | -3.474895  | 1.978268  | 0.748313 | 5.453163 | 0.051344 | 7.448574  | -1.030562                           | 3.987285                          |
| I <sub>2d</sub>              | -7.300544  | -0.255515 | 3.778029 | 7.045029 | 1.013020 | 3.622924  |                                     |                                   |
| I <sub>2e</sub>              | -10.707138 | -3.591903 | 7.149521 | 7.115234 | 3.591986 | 0.216331  | 2.578966                            | -3.406594                         |

<sup>a</sup> Forms a weak C-B interaction; <sup>b</sup> A corrected switch, calculated relative to the unsubstituted molecule, see S10.

**Table S229. Orbital Energies and Philicity Parameters of I<sub>[1-2][b-e]</sub> in SMD Toluene.** All quantities given in eV.

| Species                      | HOMO      | LUMO      | CHI      | ETA      | GEI      | N        | ΔGEI                                | ΔN                                |
|------------------------------|-----------|-----------|----------|----------|----------|----------|-------------------------------------|-----------------------------------|
| I <sub>1b</sub> <sup>a</sup> | -7.781097 | -0.140139 | 3.960618 | 7.640958 | 1.026474 | 2.858829 |                                     |                                   |
| I <sub>1c</sub>              | -6.214537 | 0.800015  | 2.707261 | 7.014552 | 0.522433 | 4.425388 | -0.504041<br>(-0.4507) <sup>b</sup> | 1.566560<br>(1.1549) <sup>b</sup> |
| I <sub>1d</sub>              | -7.556059 | -0.088165 | 3.822112 | 7.467894 | 0.978090 | 3.083867 |                                     |                                   |
| I <sub>1e</sub>              | -9.361262 | -1.363019 | 5.362140 | 7.998244 | 1.797429 | 1.278663 | 0.819339                            | -1.805204                         |
| I <sub>2b</sub>              | -7.602046 | -0.220684 | 3.911365 | 7.381362 | 1.036311 | 3.037880 |                                     |                                   |
| I <sub>2c</sub>              | -5.618336 | 0.875390  | 2.371473 | 6.493726 | 0.433024 | 5.021590 | -0.603287                           | 1.983710                          |
| I <sub>2d</sub>              | -7.516602 | -0.111839 | 3.814221 | 7.404763 | 0.982359 | 3.123323 |                                     |                                   |
| I <sub>2e</sub>              | -8.932139 | -1.430775 | 5.181457 | 7.501364 | 1.789508 | 1.707787 | 0.807148                            | -1.415537                         |

<sup>a</sup> Forms a weak C-B interaction; <sup>b</sup> A corrected switch, calculated relative to the unsubstituted molecule, see S10.

**Table S230. Orbital Energies and Philicity Parameters of I<sub>[1-2][b-e]</sub> in SMD DCM.** All quantities given in eV.

| Species         | HOMO      | LUMO      | CHI      | ETA      | GEI      | N        | ΔGEI      | ΔN        |
|-----------------|-----------|-----------|----------|----------|----------|----------|-----------|-----------|
| I <sub>1b</sub> | -7.866813 | -0.081090 | 3.973951 | 7.785723 | 1.014183 | 2.540183 |           |           |
| I <sub>1c</sub> | -7.278230 | 0.250889  | 3.513671 | 7.529119 | 0.819876 | 3.128766 | -0.194307 | 0.588582  |
| I <sub>1d</sub> | -7.660278 | -0.019320 | 3.839799 | 7.640958 | 0.964804 | 2.746718 |           |           |
| I <sub>1e</sub> | -8.468185 | -0.360551 | 4.414368 | 8.107634 | 1.201747 | 1.938812 | 0.236942  | -0.807906 |
| I <sub>2b</sub> | -7.556875 | -0.119186 | 3.838031 | 7.437689 | 0.990259 | 2.850121 |           |           |
| I <sub>2c</sub> | -6.740533 | 0.242998  | 3.248768 | 6.983531 | 0.755670 | 3.666463 | -0.234589 | 0.816342  |
| I <sub>2d</sub> | -7.629530 | -0.030205 | 3.829867 | 7.599325 | 0.965078 | 2.777467 |           |           |
| I <sub>2e</sub> | -8.276344 | -0.392116 | 4.334230 | 7.884228 | 1.191337 | 2.130652 | 0.226259  | -0.646815 |

**Table S231. Orbital Energies and Philicity Parameters of I<sub>[1-2][b-e]</sub> in SMD MeCN.** All quantities given in eV.

| Species         | HOMO      | LUMO      | CHI      | ETA      | GEI      | N        | ΔGEI      | ΔN        |
|-----------------|-----------|-----------|----------|----------|----------|----------|-----------|-----------|
| I <sub>1b</sub> | -7.879058 | -0.069661 | 3.974360 | 7.809397 | 1.011316 | 2.441678 |           |           |
| I <sub>1c</sub> | -7.567760 | 0.052790  | 3.757485 | 7.620550 | 0.926357 | 2.752976 | -0.084959 | 0.311298  |
| I <sub>1d</sub> | -7.689122 | -0.004082 | 3.846602 | 7.685041 | 0.962672 | 2.631614 |           |           |
| I <sub>1e</sub> | -8.210493 | -0.105580 | 4.158036 | 8.104913 | 1.066592 | 2.110243 | 0.103920  | -0.521370 |
| I <sub>2b</sub> | -7.567488 | -0.098777 | 3.833132 | 7.468710 | 0.983631 | 2.753248 |           |           |
| I <sub>2c</sub> | -7.054553 | 0.032654  | 3.510950 | 7.087207 | 0.869649 | 3.266183 | -0.113981 | 0.512935  |
| I <sub>2d</sub> | -7.658374 | -0.010885 | 3.834629 | 7.647489 | 0.961386 | 2.662362 |           |           |
| I <sub>2e</sub> | -8.045864 | -0.122995 | 4.084430 | 7.922868 | 1.052811 | 2.274872 | 0.091425  | -0.387490 |

**Table S232. Orbital Energies and Philicity Parameters of I<sub>[1-2][b-e]</sub> in SMD Water.** All quantities given in eV.

| Species         | HOMO      | LUMO      | CHI      | ETA      | GEI      | N        | ΔGEI      | ΔN        |
|-----------------|-----------|-----------|----------|----------|----------|----------|-----------|-----------|
| I <sub>1b</sub> | -7.972937 | -0.037007 | 4.004972 | 7.935930 | 1.010581 | 2.320587 |           |           |
| I <sub>1c</sub> | -7.604495 | 0.010612  | 3.796941 | 7.615107 | 0.946590 | 2.689030 | -0.063992 | 0.368442  |
| I <sub>1d</sub> | -7.745994 | -0.000272 | 3.873133 | 7.745722 | 0.968351 | 2.547530 |           |           |
| I <sub>1e</sub> | -8.160696 | -0.060954 | 4.110825 | 8.099742 | 1.043174 | 2.132829 | 0.074823  | -0.414702 |
| I <sub>2b</sub> | -7.567488 | -0.095240 | 3.831364 | 7.472248 | 0.982258 | 2.726037 |           |           |
| I <sub>2c</sub> | -7.108159 | -0.008980 | 3.558570 | 7.099180 | 0.891893 | 3.185365 | -0.090365 | 0.459328  |
| I <sub>2d</sub> | -7.642047 | -0.001088 | 3.821568 | 7.640958 | 0.955664 | 2.651478 |           |           |
| I <sub>2e</sub> | -7.995251 | -0.075648 | 4.035449 | 7.919603 | 1.028135 | 2.298274 | 0.072471  | -0.353204 |

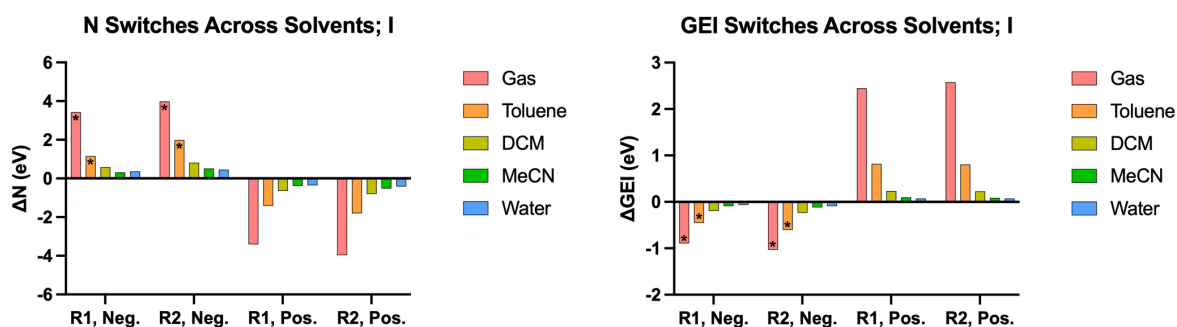

**Figure S140. I Nucleophilicity and Electrophilicity Switches Induced by Incorporation of D-LEFs.**

**Table S233. Orbital Energies and Philicity Parameters of II<sub>[1-2][b-e]</sub> in Gas.** All quantities given in eV.

| Species                       | HOMO      | LUMO      | CHI      | ETA      | GEI      | N        | ΔGEI                                | ΔN                                |
|-------------------------------|-----------|-----------|----------|----------|----------|----------|-------------------------------------|-----------------------------------|
| II <sub>1b</sub> <sup>a</sup> | -6.102426 | -0.585861 | 3.344144 | 5.516565 | 1.013611 | 4.821042 |                                     |                                   |
| II <sub>1c</sub>              | -2.647124 | 1.712413  | 0.467356 | 4.359537 | 0.025051 | 8.276344 | -0.988560<br>(-0.9406) <sup>b</sup> | 3.455302<br>(3.2281) <sup>b</sup> |
| II <sub>1d</sub>              | -5.936981 | -0.494975 | 3.215978 | 5.442006 | 0.950248 | 4.986487 |                                     |                                   |
| II <sub>1e</sub>              | -9.852428 | -3.288496 | 6.570462 | 6.563931 | 3.288500 | 1.071040 | 2.338251                            | -3.915447                         |
| II <sub>2b</sub>              | -6.001472 | -0.627767 | 3.314619 | 5.373705 | 1.022265 | 4.921996 |                                     |                                   |
| II <sub>2c</sub>              | -2.723044 | 1.946703  | 0.388170 | 4.669747 | 0.016133 | 8.200425 | -1.006132                           | 3.278428                          |
| II <sub>2d</sub>              | -5.893443 | -0.470213 | 3.181828 | 5.423230 | 0.933395 | 5.030025 |                                     |                                   |
| II <sub>2e</sub>              | -9.539769 | -3.870276 | 6.705023 | 5.669493 | 3.964845 | 1.383699 | 3.031451                            | -3.646326                         |

<sup>a</sup> Forms a weak C-B interaction; <sup>b</sup> A corrected switch, calculated relative to the unsubstituted molecule, see S10.

**Table S234. Orbital Energies and Philicity Parameters of II<sub>[1-2][b-e]</sub> in SMD Toluene.** All quantities given in eV.

| Species          | HOMO      | LUMO      | CHI      | ETA      | GEI      | N        | ΔGEI      | ΔN        |
|------------------|-----------|-----------|----------|----------|----------|----------|-----------|-----------|
| II <sub>1b</sub> | -6.751146 | -0.332795 | 3.541971 | 6.418351 | 0.977319 | 3.888780 |           |           |
| II <sub>1c</sub> | -4.900771 | 0.627223  | 2.136774 | 5.527994 | 0.412971 | 5.739154 | -0.564348 | 1.850375  |
| II <sub>1d</sub> | -6.330730 | -0.248440 | 3.289585 | 6.082290 | 0.889580 | 4.309196 |           |           |
| II <sub>1e</sub> | -7.910351 | -1.374992 | 4.642671 | 6.535360 | 1.649060 | 2.729575 | 0.759480  | -1.579621 |
| II <sub>2b</sub> | -6.355220 | -0.360007 | 3.357613 | 5.995213 | 0.940214 | 4.284705 |           |           |
| II <sub>2c</sub> | -5.028393 | 0.800015  | 2.114189 | 5.828408 | 0.383449 | 5.611533 | -0.556765 | 1.326827  |
| II <sub>2d</sub> | -6.298620 | -0.230208 | 3.264414 | 6.068412 | 0.878022 | 4.341305 |           |           |
| II <sub>2e</sub> | -7.764226 | -1.509960 | 4.637093 | 6.254266 | 1.719037 | 2.875700 | 0.841015  | -1.465605 |

**Table S235. Orbital Energies and Philicity Parameters of II<sub>[1-2][b-e]</sub> in SMD DCM.** All quantities given in eV.

| Species          | HOMO      | LUMO      | CHI      | ETA      | GEI      | N        | ΔGEI      | ΔN        |
|------------------|-----------|-----------|----------|----------|----------|----------|-----------|-----------|
| II <sub>1b</sub> | -7.021627 | -0.132519 | 3.577073 | 6.889108 | 0.928673 | 3.385369 |           |           |
| II <sub>1c</sub> | -6.308417 | 0.145853  | 3.081282 | 6.454270 | 0.735505 | 4.098580 | -0.193168 | 0.713211  |
| II <sub>1d</sub> | -6.785976 | -0.091974 | 3.438975 | 6.694002 | 0.883369 | 3.621020 |           |           |
| II <sub>1e</sub> | -7.323674 | -0.404089 | 3.863881 | 6.919584 | 1.078792 | 3.083323 | 0.195422  | -0.537697 |
| II <sub>2b</sub> | -6.808290 | -0.183405 | 3.495847 | 6.624885 | 0.922352 | 3.598706 |           |           |
| II <sub>2c</sub> | -6.400391 | 0.195106  | 3.102643 | 6.595497 | 0.729770 | 4.006605 | -0.192582 | 0.407899  |
| II <sub>2d</sub> | -6.789242 | -0.075103 | 3.432173 | 6.714138 | 0.877239 | 3.617754 |           |           |
| II <sub>2e</sub> | -7.279319 | -0.432933 | 3.856126 | 6.846386 | 1.085953 | 3.127677 | 0.208714  | -0.490077 |

**Table S236. Orbital Energies and Philicity Parameters of II<sub>[1-2][b-e]</sub> in SMD MeCN.** All quantities given in eV.

| Species          | HOMO      | LUMO      | CHI      | ETA      | GEI      | N        | ΔGEI      | ΔN        |
|------------------|-----------|-----------|----------|----------|----------|----------|-----------|-----------|
| II <sub>1b</sub> | -7.177276 | -0.092519 | 3.634897 | 7.084758 | 0.932458 | 3.143460 |           |           |
| II <sub>1c</sub> | -6.779446 | -0.003265 | 3.391356 | 6.776180 | 0.848656 | 3.541290 | -0.083802 | 0.397831  |
| II <sub>1d</sub> | -7.010743 | -0.053062 | 3.531902 | 6.957680 | 0.896443 | 3.309993 |           |           |
| II <sub>1e</sub> | -7.245305 | -0.147758 | 3.696531 | 7.097547 | 0.962610 | 3.075431 | 0.066167  | -0.234562 |
| II <sub>2b</sub> | -7.003395 | -0.133336 | 3.568366 | 6.870060 | 0.926719 | 3.317341 |           |           |
| II <sub>2c</sub> | -6.832508 | 0.006531  | 3.412989 | 6.839039 | 0.851618 | 3.488228 | -0.075102 | 0.170888  |
| II <sub>2d</sub> | -6.994416 | -0.035103 | 3.514759 | 6.959313 | 0.887554 | 3.326320 |           |           |
| II <sub>2e</sub> | -7.229794 | -0.147758 | 3.688776 | 7.082036 | 0.960675 | 3.090942 | 0.073121  | -0.235379 |

**Table S237. Orbital Energies and Philicity Parameters of II<sub>[1-2][b-e]</sub> in SMD Water.** All quantities given in eV.

| Species          | HOMO      | LUMO      | CHI      | ETA      | GEI      | N        | ΔGEI      | ΔN        |
|------------------|-----------|-----------|----------|----------|----------|----------|-----------|-----------|
| II <sub>1b</sub> | -7.212107 | -0.087893 | 3.650000 | 7.124214 | 0.935015 | 3.081418 |           |           |
| II <sub>1c</sub> | -6.872237 | -0.036463 | 3.454350 | 6.835773 | 0.872801 | 3.421288 | -0.062215 | 0.339870  |
| II <sub>1d</sub> | -7.046389 | -0.044627 | 3.545508 | 7.001763 | 0.897676 | 3.247135 |           |           |
| II <sub>1e</sub> | -7.236869 | -0.103948 | 3.670408 | 7.132922 | 0.944346 | 3.056655 | 0.046670  | -0.190480 |
| II <sub>2b</sub> | -7.045845 | -0.124628 | 3.585237 | 6.921217 | 0.928588 | 3.247679 |           |           |
| II <sub>2c</sub> | -6.915503 | -0.031021 | 3.473262 | 6.884482 | 0.876141 | 3.378022 | -0.052448 | 0.130343  |
| II <sub>2d</sub> | -7.045301 | -0.028300 | 3.536800 | 7.017001 | 0.891332 | 3.248224 |           |           |
| II <sub>2e</sub> | -7.224080 | -0.097145 | 3.660612 | 7.126935 | 0.940101 | 3.069445 | 0.048769  | -0.178779 |

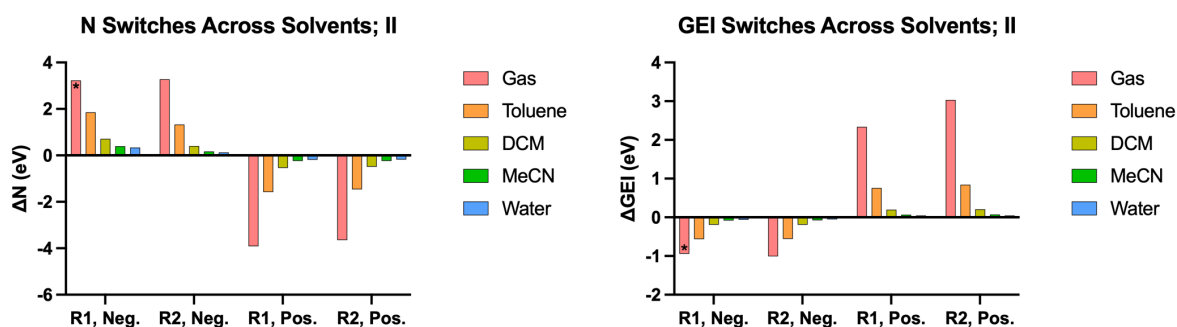

**Figure S141. II Nucleophilicity and Electrophilicity Switches Induced by Incorporation of D-LEFs.**

**Table S238. Orbital Energies and Philicity Parameters of III<sub>[1-4][b-e]</sub> in Gas.** All quantities given in eV.

| Species                        | HOMO       | LUMO      | CHI      | ETA      | GEI      | N        | ΔGEI                                | ΔN                                |
|--------------------------------|------------|-----------|----------|----------|----------|----------|-------------------------------------|-----------------------------------|
| III <sub>1a</sub> <sup>a</sup> | -8.271174  | -0.692258 | 4.481716 | 7.578916 | 1.325109 | 2.652294 |                                     |                                   |
| III <sub>1c</sub>              | -3.083595  | 1.741801  | 0.670897 | 4.825396 | 0.046639 | 7.839874 | -1.278470<br>(-0.9223) <sup>b</sup> | 5.187579<br>(3.3656) <sup>b</sup> |
| III <sub>1d</sub>              | -6.462433  | -0.367082 | 3.414757 | 6.095351 | 0.956513 | 4.461035 |                                     |                                   |
| III <sub>1e</sub>              | -10.429854 | -3.413397 | 6.921625 | 7.016457 | 3.414038 | 0.493615 | 2.457524                            | -3.967421                         |
| III <sub>2b</sub>              | -6.448283  | -0.571711 | 3.509997 | 5.876572 | 1.048237 | 4.475185 |                                     |                                   |
| III <sub>2c</sub>              | -3.103459  | 1.985343  | 0.559058 | 5.088802 | 0.030709 | 7.820009 | -1.017528                           | 3.344824                          |
| III <sub>2d</sub>              | -6.383792  | -0.409804 | 3.396798 | 5.973989 | 0.965706 | 4.539676 |                                     |                                   |
| III <sub>2e</sub>              | -9.789842  | -3.745920 | 6.767881 | 6.043922 | 3.789279 | 1.133627 | 2.823573                            | -3.406050                         |
| III <sub>3b</sub>              | -6.607742  | -0.525996 | 3.566869 | 6.081746 | 1.045962 | 4.315726 |                                     |                                   |
| III <sub>3c</sub>              | -3.307000  | 2.107250  | 0.599875 | 5.414250 | 0.033232 | 7.616468 | -1.012731                           | 3.300742                          |
| III <sub>3d</sub>              | -6.417534  | -0.404905 | 3.411220 | 6.012629 | 0.967665 | 4.505934 |                                     |                                   |
| III <sub>3e</sub>              | -9.861136  | -3.760342 | 6.810739 | 6.100794 | 3.801650 | 1.062333 | 2.833985                            | -3.443601                         |
| III <sub>4b</sub>              | -6.954415  | -0.519738 | 3.737076 | 6.434677 | 1.085193 | 3.969053 |                                     |                                   |
| III <sub>4c</sub>              | -3.114071  | 1.758944  | 0.677564 | 4.873016 | 0.047106 | 7.809397 | -1.038088                           | 3.840343                          |
| III <sub>4d</sub>              | -6.550054  | -0.355381 | 3.452717 | 6.194673 | 0.962218 | 4.373415 |                                     |                                   |
| III <sub>4e</sub>              | -10.446725 | -3.293939 | 6.870332 | 7.152786 | 3.299516 | 0.476744 | 2.337297                            | -3.896671                         |

<sup>a</sup> Forms a weak C-B interaction; <sup>b</sup> A corrected switch, calculated relative to the unsubstituted molecule, see S10.

**Table S239. Orbital Energies and Philicity Parameters of III<sub>[1-4][b-e]</sub> in SMD Toluene.** All quantities given in eV.

| Species                        | HOMO      | LUMO      | CHI      | ETA      | GEI      | N        | ΔGEI                                | ΔN                                |
|--------------------------------|-----------|-----------|----------|----------|----------|----------|-------------------------------------|-----------------------------------|
| III <sub>1a</sub> <sup>a</sup> | -8.091579 | -0.317285 | 4.204432 | 7.774294 | 1.136904 | 2.548347 |                                     |                                   |
| III <sub>1c</sub>              | -5.408536 | 0.698244  | 2.355146 | 6.106780 | 0.454144 | 5.231390 | -0.682760<br>(-0.4630) <sup>b</sup> | 2.683043<br>(1.1034) <sup>b</sup> |
| III <sub>1d</sub>              | -6.800671 | -0.169799 | 3.485235 | 6.630872 | 0.915933 | 3.839255 |                                     |                                   |
| III <sub>1e</sub>              | -8.454035 | -1.385604 | 4.919819 | 7.068431 | 1.712164 | 2.185891 | 0.796231                            | -1.653364                         |
| III <sub>2b</sub>              | -6.755500 | -0.332251 | 3.543875 | 6.423249 | 0.977625 | 3.884426 |                                     |                                   |
| III <sub>2c</sub>              | -5.229213 | 0.827770  | 2.200721 | 6.056983 | 0.399801 | 5.410713 | -0.577824                           | 1.526287                          |
| III <sub>2d</sub>              | -6.686927 | -0.209800 | 3.448363 | 6.477127 | 0.917939 | 3.952999 |                                     |                                   |
| III <sub>2e</sub>              | -8.104913 | -1.505334 | 4.805123 | 6.599578 | 1.749294 | 2.535013 | 0.831356                            | -1.417986                         |
| III <sub>3b</sub>              | -6.876318 | -0.287897 | 3.582107 | 6.588422 | 0.973791 | 3.763607 |                                     |                                   |
| III <sub>3c</sub>              | -5.551124 | 0.927636  | 2.311744 | 6.478760 | 0.412437 | 5.088802 | -0.561354                           | 1.325195                          |
| III <sub>3d</sub>              | -6.772915 | -0.183949 | 3.478432 | 6.588966 | 0.918163 | 3.867011 |                                     |                                   |
| III <sub>3e</sub>              | -8.189540 | -1.515130 | 4.852335 | 6.674410 | 1.763838 | 2.450386 | 0.845675                            | -1.416625                         |
| III <sub>4b</sub>              | -7.121221 | -0.242726 | 3.681973 | 6.878495 | 0.985457 | 3.518705 |                                     |                                   |
| III <sub>4c</sub>              | -5.292071 | 0.720013  | 2.286029 | 6.012085 | 0.434619 | 5.347854 | -0.550839                           | 1.829150                          |
| III <sub>4d</sub>              | -6.859175 | -0.155377 | 3.507276 | 6.703798 | 0.917464 | 3.780751 |                                     |                                   |
| III <sub>4e</sub>              | -8.463559 | -1.339617 | 4.901588 | 7.123942 | 1.686255 | 2.176367 | 0.768791                            | -1.604384                         |

<sup>a</sup> Forms a weak C-B interaction; <sup>b</sup> A corrected switch, calculated relative to the unsubstituted molecule, see S10.

**Table S240. Orbital Energies and Philicity Parameters of III<sub>[1-4][b-e]</sub> in SMD DCM.** All quantities given in eV.

| Species                        | HOMO      | LUMO      | CHI      | ETA      | GEI      | N        | ΔGEI      | ΔN        |
|--------------------------------|-----------|-----------|----------|----------|----------|----------|-----------|-----------|
| III <sub>1b</sub> <sup>a</sup> | -7.999332 | -0.113744 | 4.056538 | 7.885589 | 1.043391 | 2.407664 |           |           |
| III <sub>1c</sub>              | -6.764752 | 0.188575  | 3.288088 | 6.953326 | 0.777435 | 3.642245 | -0.265955 | 1.234581  |
| III <sub>1d</sub>              | -7.166664 | -0.050885 | 3.608775 | 7.115778 | 0.915097 | 3.240332 |           |           |
| III <sub>1e</sub>              | -7.738375 | -0.386946 | 4.062661 | 7.351429 | 1.122585 | 2.668621 | 0.207488  | -0.571711 |
| III <sub>2b</sub>              | -7.011831 | -0.179867 | 3.595849 | 6.831964 | 0.946297 | 3.395165 |           |           |
| III <sub>2c</sub>              | -6.399030 | 0.198371  | 3.100330 | 6.597402 | 0.728472 | 4.007966 | -0.217825 | 0.612801  |
| III <sub>2d</sub>              | -7.061084 | -0.069389 | 3.565236 | 6.991695 | 0.909001 | 3.345913 |           |           |
| III <sub>2e</sub>              | -7.594699 | -0.427219 | 4.010959 | 7.167480 | 1.122277 | 2.812297 | 0.213276  | -0.533615 |
| III <sub>3b</sub>              | -7.239318 | -0.140955 | 3.690137 | 7.098363 | 0.959172 | 3.167678 |           |           |
| III <sub>3c</sub>              | -6.792779 | 0.228031  | 3.282374 | 7.020811 | 0.767289 | 3.614217 | -0.191884 | 0.446539  |
| III <sub>3d</sub>              | -7.186800 | -0.042178 | 3.614489 | 7.144623 | 0.914291 | 3.220196 |           |           |
| III <sub>3e</sub>              | -7.665721 | -0.414974 | 4.040347 | 7.250747 | 1.125705 | 2.741275 | 0.211414  | -0.478920 |
| III <sub>4b</sub>              | -7.397688 | -0.092247 | 3.744968 | 7.305442 | 0.959886 | 3.009308 |           |           |
| III <sub>4c</sub>              | -6.501617 | 0.215786  | 3.142916 | 6.717404 | 0.735248 | 3.905379 | -0.224638 | 0.896071  |
| III <sub>4d</sub>              | -7.243672 | -0.037824 | 3.640748 | 7.205848 | 0.919742 | 3.163324 |           |           |
| III <sub>4e</sub>              | -7.791165 | -0.369803 | 4.080484 | 7.421362 | 1.121785 | 2.615831 | 0.202043  | -0.547493 |

<sup>a</sup> Forms a weak C-B interaction**Table S241. Orbital Energies and Philicity Parameters of III<sub>[1-4][b-e]</sub> in SMD MeCN.** All quantities given in eV.

| Species           | HOMO      | LUMO      | CHI      | ETA      | GEI      | N        | ΔGEI      | ΔN        |
|-------------------|-----------|-----------|----------|----------|----------|----------|-----------|-----------|
| III <sub>1b</sub> | -7.328027 | -0.077552 | 3.702790 | 7.250475 | 0.945500 | 2.992709 |           |           |
| III <sub>1c</sub> | -7.071152 | 0.018504  | 3.526324 | 7.089656 | 0.876979 | 3.249584 | -0.068521 | 0.256876  |
| III <sub>1d</sub> | -7.246393 | -0.022858 | 3.634625 | 7.223536 | 0.914407 | 3.074343 |           |           |
| III <sub>1e</sub> | -7.557964 | -0.128438 | 3.843201 | 7.429526 | 0.994020 | 2.762772 | 0.079613  | -0.311570 |
| III <sub>2b</sub> | -7.062172 | -0.136057 | 3.599114 | 6.926115 | 0.935129 | 3.258564 |           |           |
| III <sub>2c</sub> | -6.702437 | 0.004082  | 3.349178 | 6.706519 | 0.836275 | 3.618299 | -0.098854 | 0.359735  |
| III <sub>2d</sub> | -7.154147 | -0.037007 | 3.595577 | 7.117139 | 0.908242 | 3.166589 |           |           |
| III <sub>2e</sub> | -7.490207 | -0.146397 | 3.818302 | 7.343810 | 0.992634 | 2.830529 | 0.084392  | -0.336061 |
| III <sub>3b</sub> | -7.335919 | -0.104492 | 3.720205 | 7.231427 | 0.956929 | 2.984817 |           |           |
| III <sub>3c</sub> | -7.111697 | 0.016599  | 3.547549 | 7.128296 | 0.882757 | 3.209039 | -0.074172 | 0.224222  |
| III <sub>3d</sub> | -7.313605 | -0.009524 | 3.661565 | 7.304081 | 0.917778 | 3.007131 |           |           |
| III <sub>3e</sub> | -7.587080 | -0.130343 | 3.858711 | 7.456737 | 0.998403 | 2.733656 | 0.080624  | -0.273474 |
| III <sub>4b</sub> | -7.442043 | -0.069661 | 3.755852 | 7.372382 | 0.956707 | 2.878693 |           |           |
| III <sub>4c</sub> | -7.034416 | 0.021225  | 3.506596 | 7.055641 | 0.871375 | 3.286320 | -0.085333 | 0.407627  |
| III <sub>4d</sub> | -7.403403 | -0.013061 | 3.708232 | 7.390341 | 0.930335 | 2.917333 |           |           |
| III <sub>4e</sub> | -7.671163 | -0.116465 | 3.893814 | 7.554698 | 1.003467 | 2.649573 | 0.073132  | -0.267760 |



**Table S242. Orbital Energies and Philicity Parameters of III<sub>[1-4][b-e]</sub> in SMD Water.** All quantities given in eV.

| Species           | HOMO      | LUMO      | CHI      | ETA      | GEI      | N        | $\Delta$ GEI | $\Delta$ N |
|-------------------|-----------|-----------|----------|----------|----------|----------|--------------|------------|
| III <sub>1b</sub> | -7.342449 | -0.074831 | 3.708640 | 7.267618 | 0.946253 | 2.951075 |              |            |
| III <sub>1c</sub> | -7.134282 | -0.016599 | 3.575441 | 7.117683 | 0.898029 | 3.159242 | -0.048224    | 0.208167   |
| III <sub>1d</sub> | -7.309796 | -0.014422 | 3.662109 | 7.295374 | 0.919147 | 2.983729 |              |            |
| III <sub>1e</sub> | -7.531841 | -0.084355 | 3.808098 | 7.447485 | 0.973591 | 2.761684 | 0.054444     | -0.222045  |
| III <sub>2b</sub> | -7.090744 | -0.130615 | 3.610679 | 6.960129 | 0.936549 | 3.202781 |              |            |
| III <sub>2c</sub> | -6.768017 | -0.033742 | 3.400880 | 6.734275 | 0.858740 | 3.525508 | -0.077809    | 0.322727   |
| III <sub>2d</sub> | -7.202311 | -0.030477 | 3.616394 | 7.171834 | 0.911782 | 3.091214 |              |            |
| III <sub>2e</sub> | -7.461635 | -0.100682 | 3.781159 | 7.360953 | 0.971149 | 2.831889 | 0.059366     | -0.259325  |
| III <sub>3b</sub> | -7.350341 | -0.099866 | 3.725103 | 7.250475 | 0.956930 | 2.943184 |              |            |
| III <sub>3c</sub> | -7.172378 | -0.022313 | 3.597346 | 7.150065 | 0.904950 | 3.121146 | -0.051980    | 0.177962   |
| III <sub>3d</sub> | -7.340545 | -0.004354 | 3.672449 | 7.336191 | 0.919202 | 2.952980 |              |            |
| III <sub>3e</sub> | -7.577012 | -0.080274 | 3.828643 | 7.496738 | 0.977659 | 2.716513 | 0.058457     | -0.236467  |
| III <sub>4b</sub> | -7.457281 | -0.068028 | 3.762655 | 7.389253 | 0.957984 | 2.836243 |              |            |
| III <sub>4c</sub> | -6.857270 | -0.001361 | 3.429315 | 6.855910 | 0.857669 | 3.436254 | -0.100315    | 0.600011   |
| III <sub>4d</sub> | -7.437417 | -0.005170 | 3.721294 | 7.432247 | 0.931618 | 2.856107 |              |            |
| III <sub>4e</sub> | -7.654836 | -0.071838 | 3.863337 | 7.582998 | 0.984134 | 2.638688 | 0.052516     | -0.217419  |

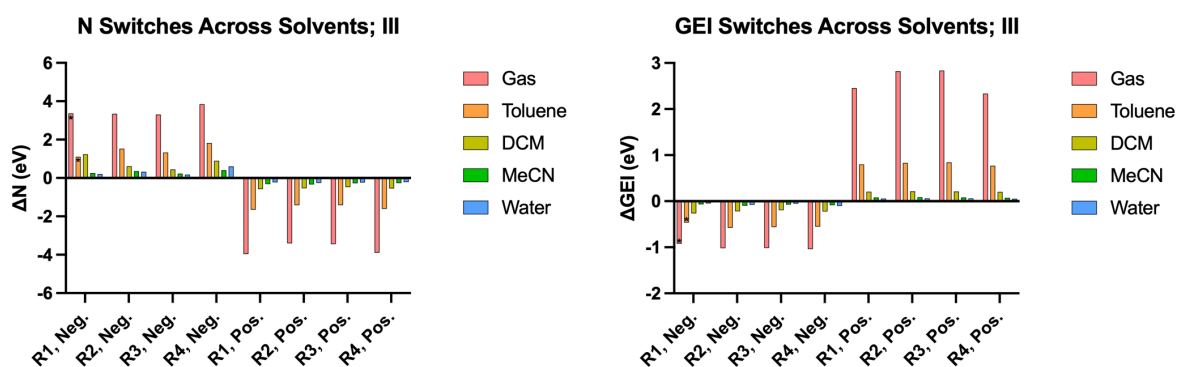

**Figure S142. III Nucleophilicity and Electrophilicity Switches Induced by Incorporation of D-LEFs.**

**Table S243. Orbital Energies and Philicity Parameters of IV<sub>[1-3][b-e]</sub> in Gas.** All quantities given in eV.

| Species          | HOMO       | LUMO      | CHI      | ETA      | GEI      | N         | ΔGEI      | ΔN        |
|------------------|------------|-----------|----------|----------|----------|-----------|-----------|-----------|
| IV <sub>1b</sub> | -8.769959  | -0.371163 | 4.570561 | 8.398796 | 1.243632 | 2.153509  |           |           |
| IV <sub>1c</sub> | -4.447430  | 2.223443  | 1.111993 | 6.670872 | 0.092681 | 6.476039  | -1.150951 | 4.322529  |
| IV <sub>1d</sub> | -7.999877  | -0.307761 | 4.153819 | 7.692116 | 1.121552 | 2.923592  |           |           |
| IV <sub>1e</sub> | -12.108524 | -3.697484 | 7.903004 | 8.411041 | 3.712827 | -1.185056 | 2.591275  | -4.108648 |
| IV <sub>2b</sub> | -8.048585  | -0.526268 | 4.287427 | 7.522317 | 1.221833 | 2.874883  |           |           |
| IV <sub>2c</sub> | -3.960890  | 2.329567  | 0.815661 | 6.290457 | 0.052882 | 6.962578  | -1.168951 | 4.087695  |
| IV <sub>2d</sub> | -7.863547  | -0.355925 | 4.109736 | 7.507623 | 1.124852 | 3.059921  |           |           |
| IV <sub>2e</sub> | -11.418716 | -3.835990 | 7.627353 | 7.582726 | 3.836121 | -0.495247 | 2.711269  | -3.555168 |
| IV <sub>3b</sub> | -8.053483  | -0.366265 | 4.209874 | 7.687218 | 1.152760 | 2.869985  |           |           |
| IV <sub>3c</sub> | -4.297767  | 1.963846  | 1.166960 | 6.261613 | 0.108742 | 6.625701  | -1.044019 | 3.755716  |
| IV <sub>3d</sub> | -7.844227  | -0.283815 | 4.064021 | 7.560413 | 1.092286 | 3.079241  |           |           |
| IV <sub>3e</sub> | -11.416267 | -3.663742 | 7.540004 | 7.752525 | 3.666654 | -0.492798 | 2.574368  | -3.572039 |

**Table S244. Orbital Energies and Philicity Parameters of IV<sub>[1-3][b-e]</sub> in SMD Toluene.** All quantities given in eV.

| Species          | HOMO       | LUMO      | CHI      | ETA      | GEI      | N        | ΔGEI      | ΔN        |
|------------------|------------|-----------|----------|----------|----------|----------|-----------|-----------|
| IV <sub>1b</sub> | -8.688597  | -0.162452 | 4.425524 | 8.526145 | 1.148542 | 1.951329 |           |           |
| IV <sub>1c</sub> | -6.705975  | 0.980426  | 2.862774 | 7.686401 | 0.533115 | 3.933951 | -0.615426 | 1.982622  |
| IV <sub>1d</sub> | -7.924773  | -0.127621 | 4.026197 | 7.797152 | 1.039499 | 2.715152 |           |           |
| IV <sub>1e</sub> | -10.001819 | -1.464517 | 5.733168 | 8.537301 | 1.925035 | 0.638107 | 0.885536  | -2.077045 |
| IV <sub>2b</sub> | -8.172941  | -0.293611 | 4.233276 | 7.879330 | 1.137192 | 2.466985 |           |           |
| IV <sub>2c</sub> | -6.449372  | 0.905323  | 2.772024 | 7.354694 | 0.522396 | 4.190554 | -0.614797 | 1.723569  |
| IV <sub>2d</sub> | -7.918787  | -0.151840 | 4.035313 | 7.766947 | 1.048272 | 2.721139 |           |           |
| IV <sub>2e</sub> | -9.552831  | -1.517307 | 5.535069 | 8.035523 | 1.906347 | 1.087095 | 0.858074  | -1.634044 |
| IV <sub>3b</sub> | -8.182465  | -0.221229 | 4.201847 | 7.961236 | 1.108843 | 2.457461 |           |           |
| IV <sub>3c</sub> | -6.409371  | 0.863145  | 2.773113 | 7.272516 | 0.528713 | 4.230555 | -0.580129 | 1.773094  |
| IV <sub>3d</sub> | -7.867629  | -0.125445 | 3.996537 | 7.742185 | 1.031512 | 2.772296 |           |           |
| IV <sub>3e</sub> | -9.588205  | -1.458803 | 5.523504 | 8.129403 | 1.876466 | 1.051720 | 0.844954  | -1.720576 |

**Table S245. Orbital Energies and Philicity Parameters of IV<sub>[1-3][b-e]</sub> in SMD DCM.** All quantities given in eV.

| Species          | HOMO      | LUMO      | CHI      | ETA      | GEI      | N        | $\Delta$ GEI | $\Delta$ N |
|------------------|-----------|-----------|----------|----------|----------|----------|--------------|------------|
| IV <sub>1b</sub> | -8.466552 | -0.100682 | 4.283617 | 8.365870 | 1.096681 | 1.940444 |              |            |
| IV <sub>1c</sub> | -7.772934 | 0.282182  | 3.745376 | 8.055116 | 0.870741 | 2.634063 | -0.225940    | 0.693618   |
| IV <sub>1d</sub> | -7.902188 | -0.020953 | 3.961570 | 7.881235 | 0.995659 | 2.504808 |              |            |
| IV <sub>1e</sub> | -9.099761 | -0.380415 | 4.740088 | 8.719346 | 1.288424 | 1.307235 | 0.292766     | -1.197573  |
| IV <sub>2b</sub> | -8.202329 | -0.148574 | 4.175452 | 8.053755 | 1.082377 | 2.204667 |              |            |
| IV <sub>2c</sub> | -7.540004 | 0.243542  | 3.648231 | 7.783546 | 0.854982 | 2.866992 | -0.227395    | 0.662325   |
| IV <sub>2d</sub> | -7.831710 | -0.029388 | 3.930549 | 7.802322 | 0.990040 | 2.575286 |              |            |
| IV <sub>2e</sub> | -8.838532 | -0.407355 | 4.622943 | 8.431177 | 1.267415 | 1.568465 | 0.277375     | -1.006821  |
| IV <sub>3b</sub> | -8.166138 | -0.131703 | 4.148921 | 8.034435 | 1.071235 | 2.240858 |              |            |
| IV <sub>3c</sub> | -7.495377 | 0.243814  | 3.625782 | 7.739191 | 0.849332 | 2.911619 | -0.221903    | 0.670761   |
| IV <sub>3d</sub> | -7.777287 | -0.030205 | 3.903746 | 7.747083 | 0.983547 | 2.629709 |              |            |
| IV <sub>3e</sub> | -8.854042 | -0.400824 | 4.627433 | 8.453218 | 1.266567 | 1.552954 | 0.283021     | -1.076755  |

**Table S246. Orbital Energies and Philicity Parameters of IV<sub>[1-3][b-e]</sub> in SMD MeCN.** All quantities given in eV.

| Species          | HOMO      | LUMO      | CHI      | ETA      | GEI      | N        | $\Delta$ GEI | $\Delta$ N |
|------------------|-----------|-----------|----------|----------|----------|----------|--------------|------------|
| IV <sub>1b</sub> | -8.450497 | -0.072654 | 4.261576 | 8.377843 | 1.083873 | 1.870239 |              |            |
| IV <sub>1c</sub> | -8.045864 | 0.063675  | 3.991095 | 8.109538 | 0.982105 | 2.274872 | -0.101768    | 0.404633   |
| IV <sub>1d</sub> | -7.894841 | 0.002993  | 3.945924 | 7.897834 | 0.985733 | 2.425895 |              |            |
| IV <sub>1e</sub> | -8.820572 | -0.103131 | 4.461852 | 8.717441 | 1.141856 | 1.500164 | 0.156123     | -0.925731  |
| IV <sub>2b</sub> | -8.120695 | -0.100138 | 4.110417 | 8.020557 | 1.053264 | 2.200041 |              |            |
| IV <sub>2c</sub> | -7.828989 | 0.029388  | 3.899800 | 7.858377 | 0.967658 | 2.491747 | -0.085606    | 0.291706   |
| IV <sub>2d</sub> | -7.799329 | 0.000544  | 3.899392 | 7.799873 | 0.974712 | 2.521407 |              |            |
| IV <sub>2e</sub> | -8.634446 | -0.120002 | 4.377224 | 8.514444 | 1.125152 | 1.686290 | 0.150440     | -0.835118  |
| IV <sub>3b</sub> | -8.149811 | -0.106941 | 4.128376 | 8.042871 | 1.059540 | 2.170925 |              |            |
| IV <sub>3c</sub> | -7.778376 | 0.028300  | 3.875038 | 7.806676 | 0.961736 | 2.542360 | -0.097804    | 0.371435   |
| IV <sub>3d</sub> | -7.785451 | -0.005170 | 3.895310 | 7.780281 | 0.975122 | 2.535285 |              |            |
| IV <sub>3e</sub> | -8.642610 | -0.127349 | 4.384979 | 8.515260 | 1.129034 | 1.678126 | 0.153913     | -0.857159  |

**Table S247. Orbital Energies and Philicity Parameters of IV<sub>[1-3][b-e]</sub> in SMD Water.** All quantities given in eV.

| Species          | HOMO      | LUMO      | CHI      | ETA      | GEI      | N        | ΔGEI      | ΔN        |
|------------------|-----------|-----------|----------|----------|----------|----------|-----------|-----------|
| IV <sub>1b</sub> | -8.489409 | -0.059321 | 4.274365 | 8.430089 | 1.083630 | 1.804115 |           |           |
| IV <sub>1c</sub> | -8.132396 | 0.033198  | 4.049599 | 8.165594 | 1.004168 | 2.161129 | -0.079462 | 0.357013  |
| IV <sub>1d</sub> | -8.010217 | 0.023402  | 3.993408 | 8.033619 | 0.992536 | 2.283308 |           |           |
| IV <sub>1e</sub> | -8.791728 | -0.042178 | 4.416953 | 8.749550 | 1.114884 | 1.501797 | 0.122349  | -0.781511 |
| IV <sub>2b</sub> | -8.228180 | -0.091974 | 4.160077 | 8.136206 | 1.063533 | 2.065345 |           |           |
| IV <sub>2c</sub> | -7.936746 | -0.000272 | 3.968509 | 7.936474 | 0.992195 | 2.356778 | -0.071337 | 0.291434  |
| IV <sub>2d</sub> | -7.926134 | 0.023402  | 3.951366 | 7.949535 | 0.982025 | 2.367391 |           |           |
| IV <sub>2e</sub> | -8.611316 | -0.058504 | 4.334910 | 8.552812 | 1.098554 | 1.682208 | 0.116528  | -0.685183 |
| IV <sub>3b</sub> | -8.188451 | -0.088709 | 4.138580 | 8.099742 | 1.057308 | 2.105073 |           |           |
| IV <sub>3c</sub> | -7.886949 | 0.000272  | 3.943339 | 7.887221 | 0.985767 | 2.406575 | -0.071542 | 0.301502  |
| IV <sub>3d</sub> | -7.934569 | 0.013334  | 3.960618 | 7.947903 | 0.986832 | 2.358955 |           |           |
| IV <sub>3e</sub> | -8.611861 | -0.067484 | 4.339672 | 8.544376 | 1.102056 | 1.681664 | 0.115223  | -0.677291 |

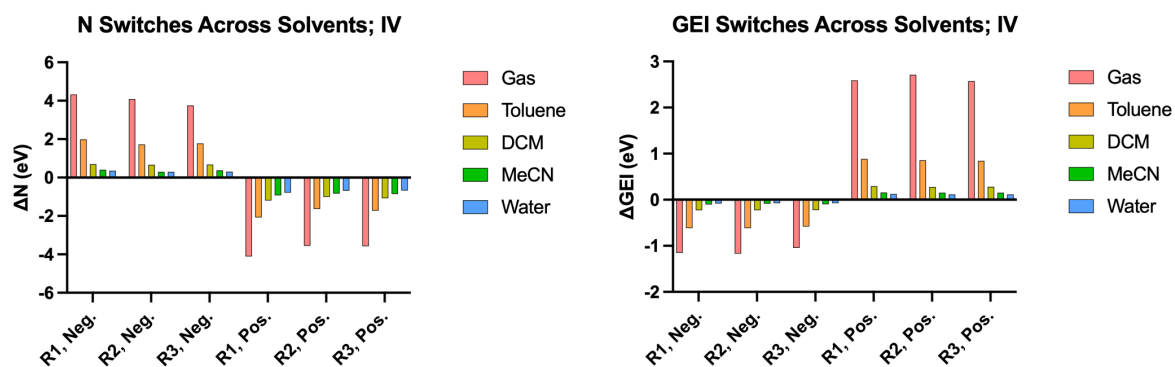

**Figure S143. IV Nucleophilicity and Electrophilicity Switches Induced by Incorporation of D-LEFs.**

**Table S248. Orbital Energies and Philicity Parameters of V<sub>[1-3][b-e]</sub> in Gas.** All quantities given in eV.

| Species                      | HOMO       | LUMO      | CHI      | ETA      | GEI      | N         | ΔGEI                                | ΔN                                |
|------------------------------|------------|-----------|----------|----------|----------|-----------|-------------------------------------|-----------------------------------|
| V <sub>1b</sub> <sup>a</sup> | -9.320990  | -0.706680 | 5.013835 | 8.614310 | 1.459115 | 1.602479  |                                     |                                   |
| V <sub>1c</sub>              | -4.236813  | 2.183442  | 1.026686 | 6.420255 | 0.082090 | 6.686655  | -1.377025<br>(-0.9949) <sup>b</sup> | 5.084176<br>(3.5386) <sup>b</sup> |
| V <sub>1d</sub>              | -7.640142  | -0.294971 | 3.967557 | 7.345171 | 1.071555 | 3.283326  |                                     |                                   |
| V <sub>1e</sub>              | -11.707701 | -3.596802 | 7.652251 | 8.110899 | 3.609769 | -0.784232 | 2.538214                            | -4.067559                         |
| V <sub>2b</sub>              | -7.772389  | -0.460689 | 4.116539 | 7.311700 | 1.158820 | 3.151079  |                                     |                                   |
| V <sub>2c</sub>              | -3.961162  | 2.330656  | 0.815253 | 6.291818 | 0.052818 | 6.962306  | -1.106003                           | 3.811227                          |
| V <sub>2d</sub>              | -7.571025  | -0.373612 | 3.972319 | 7.197413 | 1.096180 | 3.352443  |                                     |                                   |
| V <sub>2e</sub>              | -10.999932 | -3.818574 | 7.409253 | 7.181358 | 3.822190 | -0.076464 | 2.726011                            | -3.428907                         |
| V <sub>3b</sub>              | -7.772389  | -0.375245 | 4.073817 | 7.397144 | 1.121783 | 3.151079  |                                     |                                   |
| V <sub>3c</sub>              | -4.333958  | 2.016092  | 1.158933 | 6.350050 | 0.105757 | 6.589510  | -1.016026                           | 3.438431                          |
| V <sub>3d</sub>              | -7.586808  | -0.320006 | 3.953407 | 7.266802 | 1.075399 | 3.336661  |                                     |                                   |
| V <sub>3e</sub>              | -11.036396 | -3.759254 | 7.397825 | 7.277142 | 3.760254 | -0.112927 | 2.684855                            | -3.449588                         |

<sup>a</sup> Forms a weak C-B interaction; <sup>b</sup> A corrected switch, calculated relative to the unsubstituted molecule, see S10.

**Table S249. Orbital Energies and Philicity Parameters of V<sub>[1-3][b-e]</sub> in SMD Toluene.** All quantities given in eV.

| Species                      | HOMO      | LUMO      | CHI      | ETA      | GEI      | N        | ΔGEI                                | ΔN                                |
|------------------------------|-----------|-----------|----------|----------|----------|----------|-------------------------------------|-----------------------------------|
| V <sub>1b</sub> <sup>a</sup> | -9.196633 | -0.543684 | 4.870159 | 8.652950 | 1.370541 | 1.443292 |                                     |                                   |
| V <sub>1c</sub>              | -6.391139 | 0.941786  | 2.724676 | 7.332925 | 0.506201 | 4.248786 | -0.864340<br>(-0.5003) <sup>b</sup> | 2.805494<br>(1.2251) <sup>b</sup> |
| V <sub>1d</sub>              | -7.667898 | -0.134696 | 3.901297 | 7.533201 | 1.010203 | 2.972028 |                                     |                                   |
| V <sub>1e</sub>              | -9.628206 | -1.460163 | 5.544185 | 8.168043 | 1.881600 | 1.011719 | 0.871398                            | -1.960309                         |
| V <sub>2b</sub>              | -7.862731 | -0.259052 | 4.060892 | 7.603679 | 1.084399 | 2.777194 |                                     |                                   |
| V <sub>2c</sub>              | -6.456447 | 0.924099  | 2.766174 | 7.380545 | 0.518371 | 4.183479 | -0.566028                           | 1.406285                          |
| V <sub>2d</sub>              | -7.705994 | -0.174697 | 3.940345 | 7.531296 | 1.030787 | 2.933932 |                                     |                                   |
| V <sub>2e</sub>              | -9.162891 | -1.523021 | 5.342956 | 7.639870 | 1.868303 | 1.477034 | 0.837516                            | -1.456898                         |
| V <sub>3b</sub>              | -7.868718 | -0.233202 | 4.050960 | 7.635516 | 1.074601 | 2.771208 |                                     |                                   |
| V <sub>3c</sub>              | -6.420255 | 0.890629  | 2.764813 | 7.310884 | 0.522795 | 4.219670 | -0.551806                           | 1.448462                          |
| V <sub>3d</sub>              | -7.724497 | -0.148302 | 3.936400 | 7.576195 | 1.022627 | 2.915428 |                                     |                                   |
| V <sub>3e</sub>              | -9.213232 | -1.523294 | 5.368263 | 7.689939 | 1.873763 | 1.426693 | 0.851136                            | -1.488735                         |

<sup>a</sup> Forms a weak C-B interaction; <sup>b</sup> A corrected switch, calculated relative to the unsubstituted molecule, see S10.

**Table S250. Orbital Energies and Philicity Parameters of V<sub>[1-3][b-e]</sub> in SMD DCM.** All quantities given in eV.

| Species                      | HOMO      | LUMO      | CHI      | ETA      | GEI      | N        | ΔGEI      | ΔN        |
|------------------------------|-----------|-----------|----------|----------|----------|----------|-----------|-----------|
| V <sub>1b</sub> <sup>a</sup> | -9.034454 | -0.446267 | 4.740360 | 8.588187 | 1.308251 | 1.372543 |           |           |
| V <sub>1c</sub>              | -7.555787 | 0.263950  | 3.645918 | 7.819737 | 0.849947 | 2.851209 | -0.458305 | 1.478667  |
| V <sub>1d</sub>              | -7.724225 | -0.040001 | 3.882113 | 7.684224 | 0.980633 | 2.682771 |           |           |
| V <sub>1e</sub>              | -8.559071 | -0.398919 | 4.478995 | 8.160152 | 1.229229 | 1.847925 | 0.248597  | -0.834845 |
| V <sub>2b</sub>              | -8.026272 | -0.138234 | 4.082253 | 7.888038 | 1.056333 | 2.380725 |           |           |
| V <sub>2c</sub>              | -7.519596 | 0.236467  | 3.641564 | 7.756062 | 0.854879 | 2.887401 | -0.201454 | 0.506676  |
| V <sub>2d</sub>              | -7.796880 | -0.059049 | 3.927964 | 7.737831 | 0.996979 | 2.610117 |           |           |
| V <sub>2e</sub>              | -8.437436 | -0.422321 | 4.429878 | 8.015115 | 1.224176 | 1.969560 | 0.227197  | -0.640556 |
| V <sub>3b</sub>              | -8.032258 | -0.126261 | 4.079259 | 7.905997 | 1.052388 | 2.374738 |           |           |
| V <sub>3c</sub>              | -7.515786 | 0.235651  | 3.640068 | 7.751437 | 0.854686 | 2.891210 | -0.197702 | 0.516472  |
| V <sub>3d</sub>              | -7.780281 | -0.045715 | 3.912998 | 7.734565 | 0.989813 | 2.626715 |           |           |
| V <sub>3e</sub>              | -8.485328 | -0.455247 | 4.470287 | 8.030081 | 1.244288 | 1.921668 | 0.254475  | -0.705047 |

<sup>a</sup> Forms a weak C-B interaction**Table S251. Orbital Energies and Philicity Parameters of V<sub>[1-3][b-e]</sub> in SMD MeCN.** All quantities given in eV.

| Species                      | HOMO      | LUMO      | CHI      | ETA      | GEI      | N        | ΔGEI      | ΔN        |
|------------------------------|-----------|-----------|----------|----------|----------|----------|-----------|-----------|
| V <sub>1b</sub> <sup>a</sup> | -8.977038 | -0.418783 | 4.697910 | 8.558254 | 1.289420 | 1.343698 |           |           |
| V <sub>1c</sub>              | -7.903004 | 0.050613  | 3.926195 | 7.953617 | 0.969057 | 2.417732 | -0.320363 | 1.074034  |
| V <sub>1d</sub>              | -7.743817 | -0.017415 | 3.880616 | 7.726402 | 0.974528 | 2.576919 |           |           |
| V <sub>1e</sub>              | -8.316345 | -0.130070 | 4.223208 | 8.186275 | 1.089353 | 2.004391 | 0.114825  | -0.572528 |
| V <sub>2b</sub>              | -8.082871 | -0.108029 | 4.095450 | 7.974842 | 1.051602 | 2.237865 |           |           |
| V <sub>2c</sub>              | -7.496738 | 0.037007  | 3.729865 | 7.533745 | 0.923305 | 2.823998 | -0.128296 | 0.586133  |
| V <sub>2d</sub>              | -7.792254 | -0.029388 | 3.910821 | 7.762865 | 0.985108 | 2.528482 |           |           |
| V <sub>2e</sub>              | -8.279610 | -0.136057 | 4.207833 | 8.143553 | 1.087109 | 2.041126 | 0.102001  | -0.487356 |
| V <sub>3b</sub>              | -8.101103 | -0.099322 | 4.100212 | 8.001781 | 1.050500 | 2.219633 |           |           |
| V <sub>3c</sub>              | -7.631979 | 0.032926  | 3.799526 | 7.664904 | 0.941721 | 2.688757 | -0.108779 | 0.469124  |
| V <sub>3d</sub>              | -7.782458 | -0.021225 | 3.901841 | 7.761233 | 0.980796 | 2.538278 |           |           |
| V <sub>3e</sub>              | -8.326141 | -0.173609 | 4.249875 | 8.152532 | 1.107719 | 1.994595 | 0.126924  | -0.543684 |

<sup>a</sup> Forms a weak C-B interaction

**Table S252. Orbital Energies and Philicity Parameters of  $V_{[1-3][b-e]}$  in SMD Water.** All quantities given in eV.

| Species    | HOMO      | LUMO      | CHI      | ETA      | GEI      | N        | $\Delta$ GEI | $\Delta$ N |
|------------|-----------|-----------|----------|----------|----------|----------|--------------|------------|
| $V_{1b}^a$ | -8.971595 | -0.414429 | 4.693012 | 8.557166 | 1.286896 | 1.321929 |              |            |
| $V_{1c}$   | -7.968856 | 0.008980  | 3.979938 | 7.977835 | 0.992745 | 2.324669 | -0.294151    | 1.002740   |
| $V_{1d}$   | -7.825452 | -0.011973 | 3.918712 | 7.813479 | 0.982680 | 2.468073 |              |            |
| $V_{1e}$   | -8.273623 | -0.083267 | 4.178445 | 8.190356 | 1.065851 | 2.019901 | 0.083171     | -0.448172  |
| $V_{2b}$   | -8.086409 | -0.102587 | 4.094498 | 7.983822 | 1.049930 | 2.207116 |              |            |
| $V_{2c}$   | -7.552249 | -0.004898 | 3.778574 | 7.547351 | 0.945870 | 2.741275 | -0.104061    | 0.534160   |
| $V_{2d}$   | -7.922868 | -0.023130 | 3.972999 | 7.899739 | 0.999066 | 2.370656 |              |            |
| $V_{2e}$   | -8.253759 | -0.086260 | 4.170009 | 8.167499 | 1.064523 | 2.039766 | 0.065457     | -0.330891  |
| $V_{3b}$   | -8.116341 | -0.094424 | 4.105382 | 8.021918 | 1.050507 | 2.177183 |              |            |
| $V_{3c}$   | -7.684497 | -0.006531 | 3.845514 | 7.677966 | 0.963014 | 2.609028 | -0.087493    | 0.431845   |
| $V_{3d}$   | -7.878242 | -0.011973 | 3.945107 | 7.866269 | 0.989279 | 2.415283 |              |            |
| $V_{3e}$   | -8.299746 | -0.119186 | 4.209466 | 8.180560 | 1.083031 | 1.993779 | 0.093752     | -0.421504  |

<sup>a</sup> Forms a weak C-B interaction

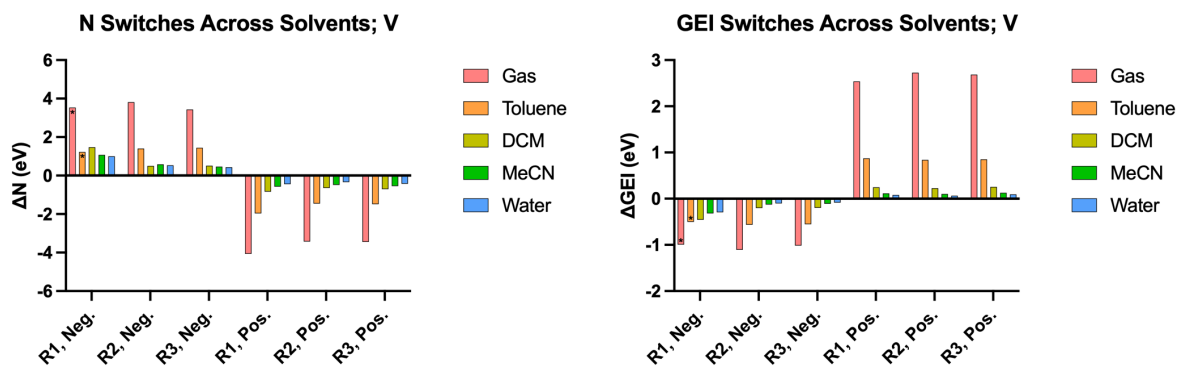

**Figure S144. V Nucleophilicity and Electrophilicity Switches Induced by Incorporation of D-LEFs.**

**Table S253. Orbital Energies and Philicity Parameters of VI<sub>[1-2][b-e]</sub> in Gas.** All quantities given in eV.

| Species          | HOMO       | LUMO      | CHI      | ETA      | GEI      | N         | ΔGEI      | ΔN        |
|------------------|------------|-----------|----------|----------|----------|-----------|-----------|-----------|
| VI <sub>1b</sub> | -7.446669  | -0.309666 | 3.878167 | 7.137003 | 1.053676 | 3.476799  |           |           |
| VI <sub>1c</sub> | -3.741022  | 1.914593  | 0.913214 | 5.655615 | 0.073729 | 7.182446  | -0.979948 | 3.705647  |
| VI <sub>1d</sub> | -7.270339  | -0.223950 | 3.747144 | 7.046389 | 0.996332 | 3.653129  |           |           |
| VI <sub>1e</sub> | -11.141704 | -3.381015 | 7.261359 | 7.760688 | 3.397079 | -0.218235 | 2.400746  | -3.871364 |
| VI <sub>2b</sub> | -7.326123  | -0.360823 | 3.843473 | 6.965299 | 1.060420 | 3.597346  |           |           |
| VI <sub>2c</sub> | -3.967965  | 2.055548  | 0.956208 | 6.023513 | 0.075897 | 6.955503  | -0.984523 | 3.358158  |
| VI <sub>2d</sub> | -7.170473  | -0.264223 | 3.717348 | 6.906251 | 1.000447 | 3.752995  |           |           |
| VI <sub>2e</sub> | -10.748499 | -3.538569 | 7.143534 | 7.209930 | 3.538875 | 0.174969  | 2.538428  | -3.578026 |

**Table S254. Orbital Energies and Philicity Parameters of VI<sub>[1-2][b-e]</sub> in SMD Toluene.** All quantities given in eV.

| Species          | HOMO      | LUMO      | CHI      | ETA      | GEI      | N        | ΔGEI      | ΔN        |
|------------------|-----------|-----------|----------|----------|----------|----------|-----------|-----------|
| VI <sub>1b</sub> | -7.547351 | -0.162996 | 3.855174 | 7.384355 | 1.006341 | 3.092574 |           |           |
| VI <sub>1c</sub> | -5.719290 | 0.805457  | 2.456916 | 6.524747 | 0.462580 | 4.920636 | -0.543761 | 1.828061  |
| VI <sub>1d</sub> | -7.379185 | -0.093607 | 3.736396 | 7.285578 | 0.958102 | 3.260741 |           |           |
| VI <sub>1e</sub> | -9.118537 | -1.341794 | 5.230165 | 7.776743 | 1.758746 | 1.521389 | 0.800644  | -1.739352 |
| VI <sub>2b</sub> | -7.394695 | -0.202997 | 3.798846 | 7.191698 | 1.003326 | 3.245230 |           |           |
| VI <sub>2c</sub> | -5.961199 | 0.901241  | 2.529979 | 6.862440 | 0.466364 | 4.678726 | -0.536961 | 1.433496  |
| VI <sub>2d</sub> | -7.247754 | -0.108573 | 3.678164 | 7.139180 | 0.947510 | 3.392172 |           |           |
| VI <sub>2e</sub> | -8.728870 | -1.408189 | 5.068530 | 7.320680 | 1.754618 | 1.911056 | 0.807108  | -1.481116 |

**Table S255. Orbital Energies and Philicity Parameters of VI<sub>[1-2][b-e]</sub> in SMD DCM.** All quantities given in eV.

| Species          | HOMO      | LUMO      | CHI      | ETA      | GEI      | N        | ΔGEI      | ΔN        |
|------------------|-----------|-----------|----------|----------|----------|----------|-----------|-----------|
| VI <sub>1b</sub> | -7.466261 | -0.068028 | 3.767145 | 7.398233 | 0.959106 | 2.940735 |           |           |
| VI <sub>1c</sub> | -6.711145 | 0.235379  | 3.237883 | 6.946524 | 0.754614 | 3.695851 | -0.204492 | 0.755116  |
| VI <sub>1d</sub> | -7.409934 | -0.026939 | 3.718436 | 7.382994 | 0.936393 | 2.997062 |           |           |
| VI <sub>1e</sub> | -8.242330 | -0.367082 | 4.304706 | 7.875248 | 1.176502 | 2.164666 | 0.240109  | -0.832396 |
| VI <sub>2b</sub> | -7.298095 | -0.124900 | 3.711498 | 7.173195 | 0.960187 | 3.108901 |           |           |
| VI <sub>2c</sub> | -6.918496 | 0.247624  | 3.335436 | 7.166120 | 0.776231 | 3.488500 | -0.183955 | 0.379599  |
| VI <sub>2d</sub> | -7.313061 | -0.034014 | 3.673538 | 7.279047 | 0.926967 | 3.093935 |           |           |
| VI <sub>2e</sub> | -7.786539 | -0.386130 | 4.086334 | 7.400410 | 1.128190 | 2.620457 | 0.201222  | -0.473478 |



**Table S256. Orbital Energies and Philicity Parameters of VI<sub>[1-2][b-e]</sub> in SMD MeCN.** All quantities given in eV.

| Species          | HOMO      | LUMO      | CHI      | ETA      | GEI      | N        | ΔGEI      | ΔN        |
|------------------|-----------|-----------|----------|----------|----------|----------|-----------|-----------|
| VI <sub>1b</sub> | -7.451295 | -0.056055 | 3.753675 | 7.395239 | 0.952645 | 2.869441 |           |           |
| VI <sub>1c</sub> | -6.970470 | 0.042994  | 3.463738 | 7.013464 | 0.855318 | 3.350266 | -0.097327 | 0.480825  |
| VI <sub>1d</sub> | -7.363130 | -0.012517 | 3.687824 | 7.350613 | 0.925096 | 2.957606 |           |           |
| VI <sub>1e</sub> | -7.963141 | -0.115921 | 4.039531 | 7.847221 | 1.039719 | 2.357595 | 0.114623  | -0.600011 |
| VI <sub>2b</sub> | -7.284761 | -0.099049 | 3.691905 | 7.185712 | 0.948421 | 3.035975 |           |           |
| VI <sub>2c</sub> | -7.171018 | 0.039457  | 3.565781 | 7.210474 | 0.881689 | 3.149718 | -0.066732 | 0.113744  |
| VI <sub>2d</sub> | -7.331565 | -0.011973 | 3.671769 | 7.319592 | 0.920945 | 2.989171 |           |           |
| VI <sub>2e</sub> | -7.554970 | -0.133608 | 3.844289 | 7.421362 | 0.995677 | 2.765766 | 0.074732  | -0.223406 |

**Table S257. Orbital Energies and Philicity Parameters of VI<sub>[1-2][b-e]</sub> in SMD Water.** All quantities given in eV.

| Species                       | HOMO      | LUMO      | CHI      | ETA      | GEI      | N        | ΔGEI      | ΔN        |
|-------------------------------|-----------|-----------|----------|----------|----------|----------|-----------|-----------|
| VI <sub>1b</sub> <sup>a</sup> | -7.989536 | -0.050613 | 4.020075 | 7.938923 | 1.017833 | 2.303988 |           |           |
| VI <sub>1c</sub>              | -7.148704 | 0.007891  | 3.570406 | 7.156596 | 0.890633 | 3.144820 | -0.127200 | 0.840832  |
| VI <sub>1d</sub>              | -7.270611 | -0.020136 | 3.645374 | 7.250475 | 0.916406 | 3.022913 |           |           |
| VI <sub>1e</sub>              | -7.891575 | -0.072927 | 3.982251 | 7.818649 | 1.014134 | 2.401949 | 0.097729  | -0.620964 |
| VI <sub>2b</sub>              | -7.401770 | -0.093879 | 3.747825 | 7.307891 | 0.961029 | 2.891754 |           |           |
| VI <sub>2c</sub>              | -7.310612 | 0.003537  | 3.653537 | 7.314150 | 0.912501 | 2.982913 | -0.048528 | 0.091158  |
| VI <sub>2d</sub>              | -7.383811 | 0.005714  | 3.689048 | 7.389525 | 0.920836 | 2.909714 |           |           |
| VI <sub>2e</sub>              | -7.605856 | -0.080001 | 3.842929 | 7.525854 | 0.981158 | 2.687669 | 0.060322  | -0.222045 |

<sup>a</sup> Forms a weak C-B interaction

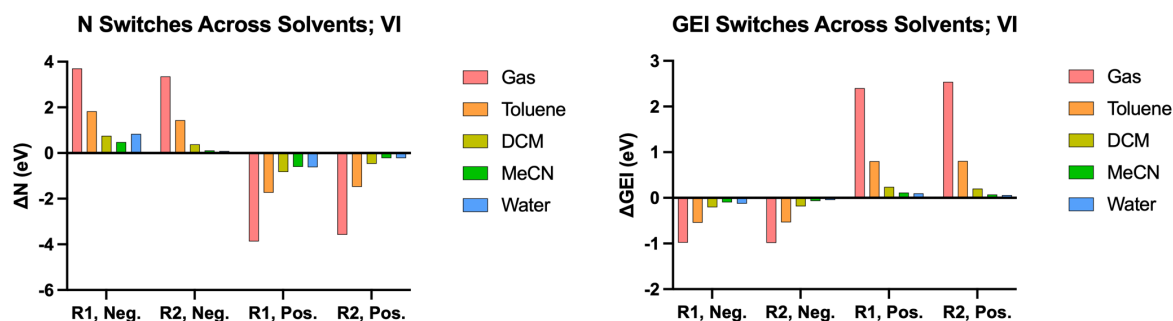

**Figure S145. VI Nucleophilicity and Electrophilicity Switches Induced by Incorporation of D-LEFs.**

**Table S258. Orbital Energies and Philicity Parameters of VII<sub>[1-3][b-e]</sub> in Gas.** All quantities given in eV.

| Species                        | HOMO       | LUMO      | CHI      | ETA      | GEI      | N        | ΔGEI                                | ΔN                                |
|--------------------------------|------------|-----------|----------|----------|----------|----------|-------------------------------------|-----------------------------------|
| VII <sub>1b</sub> <sup>a</sup> | -8.332400  | -0.546677 | 4.439538 | 7.785723 | 1.265746 | 2.591069 |                                     |                                   |
| VII <sub>1c</sub>              | -3.034070  | 1.726835  | 0.653618 | 4.760905 | 0.044867 | 7.889398 | -1.220879<br>(-0.8954) <sup>b</sup> | 5.298330<br>(3.6912) <sup>b</sup> |
| VII <sub>1d</sub>              | -6.708152  | -0.266400 | 3.487276 | 6.441752 | 0.943927 | 4.215316 |                                     |                                   |
| VII <sub>1e</sub>              | -10.624415 | -3.318701 | 6.971558 | 7.305714 | 3.326343 | 0.299053 | 2.382416                            | -3.916263                         |
| VII <sub>2b</sub>              | -6.819174  | -0.315108 | 3.567141 | 6.504066 | 0.978195 | 4.104294 |                                     |                                   |
| VII <sub>2c</sub>              | -3.650408  | 1.871872  | 0.889268 | 5.522279 | 0.071601 | 7.273060 | -0.906595                           | 3.168766                          |
| VII <sub>2d</sub>              | -6.594136  | -0.289529 | 3.441833 | 6.304607 | 0.939489 | 4.329332 |                                     |                                   |
| VII <sub>2e</sub>              | -9.907939  | -3.449316 | 6.678628 | 6.458623 | 3.453063 | 1.015529 | 2.513574                            | -3.313803                         |
| VII <sub>3b</sub>              | -6.869788  | -0.386130 | 3.627959 | 6.483658 | 1.015020 | 4.053681 |                                     |                                   |
| VII <sub>3c</sub>              | -3.796533  | 2.004391  | 0.896071 | 5.800924 | 0.069208 | 7.126935 | -0.945812                           | 3.073254                          |
| VII <sub>3d</sub>              | -6.700533  | -0.284631 | 3.492582 | 6.415902 | 0.950617 | 4.222936 |                                     |                                   |
| VII <sub>3e</sub>              | -9.649975  | -3.641700 | 6.645838 | 6.008275 | 3.675528 | 1.273493 | 2.724911                            | -2.949443                         |

<sup>a</sup> Forms a weak C-B interaction; <sup>b</sup> A corrected switch, calculated relative to the unsubstituted molecule, see S10.

**Table S259. Orbital Energies and Philicity Parameters of VII<sub>[1-3][b-e]</sub> in SMD Toluene.** All quantities given in eV.

| Species                        | HOMO      | LUMO      | CHI      | ETA      | GEI      | N        | ΔGEI                                | ΔN                                |
|--------------------------------|-----------|-----------|----------|----------|----------|----------|-------------------------------------|-----------------------------------|
| VII <sub>1b</sub> <sup>a</sup> | -8.090218 | -0.250617 | 4.170418 | 7.839601 | 1.109265 | 2.549707 |                                     |                                   |
| VII <sub>1c</sub>              | -5.400645 | 0.752395  | 2.324125 | 6.153040 | 0.438934 | 5.239281 | -0.670331<br>(-0.4611) <sup>b</sup> | 2.689574<br>(1.2057) <sup>b</sup> |
| VII <sub>1d</sub>              | -6.868971 | -0.112111 | 3.490541 | 6.756860 | 0.901593 | 3.770954 |                                     |                                   |
| VII <sub>1e</sub>              | -8.599888 | -1.315126 | 4.957507 | 7.284761 | 1.686869 | 2.040038 | 0.785276                            | -1.730917                         |
| VII <sub>2b</sub>              | -6.911965 | -0.178235 | 3.545100 | 6.733731 | 0.933192 | 3.727960 |                                     |                                   |
| VII <sub>2c</sub>              | -5.632758 | 0.801648  | 2.415555 | 6.434405 | 0.453415 | 5.007168 | -0.479778                           | 1.279207                          |
| VII <sub>2d</sub>              | -6.814821 | -0.099049 | 3.456935 | 6.715771 | 0.889727 | 3.825105 |                                     |                                   |
| VII <sub>2e</sub>              | -8.077429 | -1.377441 | 4.727435 | 6.699988 | 1.667812 | 2.562497 | 0.778085                            | -1.262608                         |
| VII <sub>3b</sub>              | -6.978089 | -0.214970 | 3.596529 | 6.763119 | 0.956291 | 3.661837 |                                     |                                   |
| VII <sub>3c</sub>              | -5.815346 | 0.817430  | 2.498958 | 6.632776 | 0.470752 | 4.824579 | -0.485539                           | 1.162743                          |
| VII <sub>3d</sub>              | -6.888563 | -0.124900 | 3.506732 | 6.763663 | 0.909061 | 3.751362 |                                     |                                   |
| VII <sub>3e</sub>              | -8.046680 | -1.456081 | 4.751381 | 6.590599 | 1.712714 | 2.593245 | 0.803653                            | -1.158117                         |

<sup>a</sup> Forms a weak C-B interaction; <sup>b</sup> A corrected switch, calculated relative to the unsubstituted molecule, see S10.

**Table S260. Orbital Energies and Philicity Parameters of VII<sub>[1-3][b-e]</sub> in SMD DCM.** All quantities given in eV.

| Species                        | HOMO      | LUMO      | CHI      | ETA      | GEI      | N        | ΔGEI      | ΔN        |
|--------------------------------|-----------|-----------|----------|----------|----------|----------|-----------|-----------|
| VII <sub>1b</sub> <sup>a</sup> | -7.946542 | -0.093607 | 4.020075 | 7.852935 | 1.028978 | 2.460454 |           |           |
| VII <sub>1c</sub>              | -6.628422 | 0.212521  | 3.207951 | 6.840943 | 0.752159 | 3.778574 | -0.276820 | 1.318120  |
| VII <sub>1d</sub>              | -7.122037 | -0.024490 | 3.573264 | 7.097547 | 0.899481 | 3.284959 |           |           |
| VII <sub>1e</sub>              | -7.748171 | -0.360823 | 4.054497 | 7.387348 | 1.112642 | 2.658825 | 0.213161  | -0.626134 |
| VII <sub>2b</sub>              | -7.099996 | -0.104764 | 3.602380 | 6.995232 | 0.927570 | 3.307000 |           |           |
| VII <sub>2c</sub>              | -6.685294 | 0.222317  | 3.231489 | 6.907611 | 0.755870 | 3.721702 | -0.171700 | 0.414702  |
| VII <sub>2d</sub>              | -7.048022 | -0.035103 | 3.541562 | 7.012919 | 0.894254 | 3.358974 |           |           |
| VII <sub>2e</sub>              | -7.387076 | -0.399463 | 3.893270 | 6.987613 | 1.084601 | 3.019920 | 0.190347  | -0.339054 |
| VII <sub>3b</sub>              | -7.183535 | -0.121363 | 3.652449 | 7.062172 | 0.944496 | 3.223461 |           |           |
| VII <sub>3c</sub>              | -6.839855 | 0.219052  | 3.310402 | 7.058907 | 0.776236 | 3.567141 | -0.168259 | 0.343680  |
| VII <sub>3d</sub>              | -7.144623 | -0.041906 | 3.593264 | 7.102717 | 0.908916 | 3.262374 |           |           |
| VII <sub>3e</sub>              | -7.493745 | -0.410076 | 3.951910 | 7.083669 | 1.102366 | 2.913251 | 0.193450  | -0.349122 |

<sup>a</sup> Forms a weak C-B interaction**Table S261. Orbital Energies and Philicity Parameters of VII<sub>[1-3][b-e]</sub> in SMD MeCN.** All quantities given in eV.

| Species                        | HOMO      | LUMO      | CHI      | ETA      | GEI      | N        | ΔGEI      | ΔN        |
|--------------------------------|-----------|-----------|----------|----------|----------|----------|-----------|-----------|
| VII <sub>1b</sub> <sup>a</sup> | -7.902188 | -0.069117 | 3.985652 | 7.833071 | 1.013997 | 2.418548 |           |           |
| VII <sub>1c</sub>              | -6.953326 | 0.030477  | 3.461425 | 6.983803 | 0.857804 | 3.367410 | -0.156194 | 0.948861  |
| VII <sub>1d</sub>              | -7.236869 | -0.004626 | 3.620748 | 7.232243 | 0.906345 | 3.083867 |           |           |
| VII <sub>1e</sub>              | -7.547351 | -0.117009 | 3.832180 | 7.430342 | 0.988219 | 2.773385 | 0.081874  | -0.310482 |
| VII <sub>2b</sub>              | -7.186256 | -0.083539 | 3.634897 | 7.102717 | 0.930100 | 3.134480 |           |           |
| VII <sub>2c</sub>              | -6.987613 | 0.029933  | 3.478840 | 7.017545 | 0.862291 | 3.333123 | -0.067810 | 0.198643  |
| VII <sub>2d</sub>              | -7.157412 | -0.013878 | 3.585645 | 7.143534 | 0.899894 | 3.163324 |           |           |
| VII <sub>2e</sub>              | -7.258366 | -0.125445 | 3.691905 | 7.132922 | 0.955441 | 3.062370 | 0.055546  | -0.100954 |
| VII <sub>3b</sub>              | -7.276598 | -0.096600 | 3.686599 | 7.179997 | 0.946450 | 3.044138 |           |           |
| VII <sub>3c</sub>              | -7.126663 | 0.018232  | 3.554216 | 7.144895 | 0.884019 | 3.194073 | -0.062430 | 0.149935  |
| VII <sub>3d</sub>              | -7.250203 | -0.022858 | 3.636530 | 7.227345 | 0.914883 | 3.070533 |           |           |
| VII <sub>3e</sub>              | -7.379457 | -0.144765 | 3.762111 | 7.234692 | 0.978167 | 2.941279 | 0.063284  | -0.129254 |

<sup>a</sup> Forms a weak C-B interaction

**Table S262. Orbital Energies and Philicity Parameters of VII<sub>[1-3][b-e]</sub> in SMD Water.** All quantities given in eV.

| Species                        | HOMO      | LUMO      | CHI      | ETA      | GEI      | N        | ΔGEI      | ΔN        |
|--------------------------------|-----------|-----------|----------|----------|----------|----------|-----------|-----------|
| VII <sub>1b</sub> <sup>a</sup> | -7.899194 | -0.066940 | 3.983067 | 7.832254 | 1.012788 | 2.394330 |           |           |
| VII <sub>1c</sub>              | -6.967476 | -0.015238 | 3.491357 | 6.952238 | 0.876666 | 3.326048 | -0.136122 | 0.931718  |
| VII <sub>1d</sub>              | -7.262992 | 0.000816  | 3.631088 | 7.263808 | 0.907568 | 3.030533 |           |           |
| VII <sub>1e</sub>              | -7.505446 | -0.074287 | 3.789866 | 7.431158 | 0.966410 | 2.788079 | 0.058842  | -0.242453 |
| VII <sub>2b</sub>              | -7.213739 | -0.079729 | 3.646734 | 7.134010 | 0.932061 | 3.079785 |           |           |
| VII <sub>2c</sub>              | -7.052104 | -0.008436 | 3.530270 | 7.043668 | 0.884681 | 3.241421 | -0.047380 | 0.161636  |
| VII <sub>2d</sub>              | -7.206120 | -0.017143 | 3.611632 | 7.188977 | 0.907214 | 3.087404 |           |           |
| VII <sub>2e</sub>              | -7.227073 | -0.081634 | 3.654354 | 7.145439 | 0.934463 | 3.066452 | 0.027249  | -0.020953 |
| VII <sub>3b</sub>              | -7.297823 | -0.091974 | 3.694899 | 7.205848 | 0.947305 | 2.995702 |           |           |
| VII <sub>3c</sub>              | -7.196596 | -0.014422 | 3.605509 | 7.182174 | 0.904997 | 3.096928 | -0.042308 | 0.101226  |
| VII <sub>3d</sub>              | -7.276870 | -0.019048 | 3.647959 | 7.257822 | 0.916777 | 3.016655 |           |           |
| VII <sub>3e</sub>              | -7.363946 | -0.098777 | 3.731362 | 7.265169 | 0.958206 | 2.929578 | 0.041430  | -0.087076 |

<sup>a</sup> Forms a weak C-B interaction

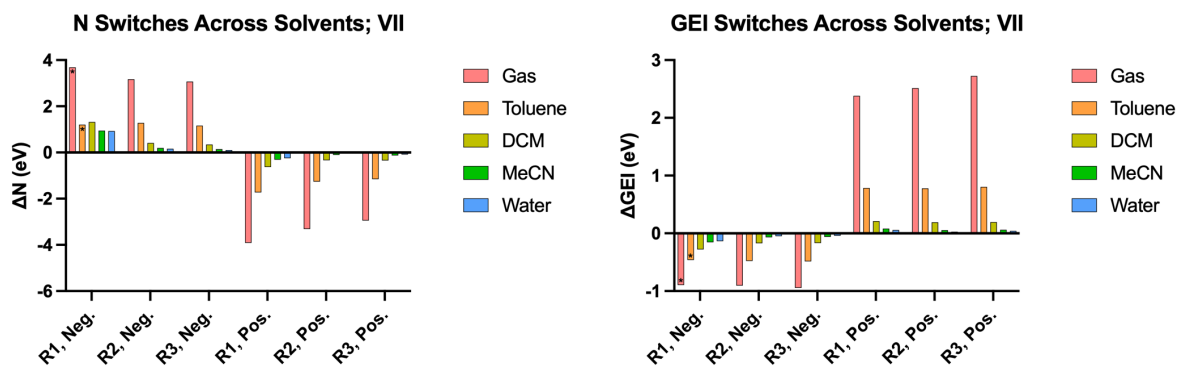

**Figure S146. VII Nucleophilicity and Electrophilicity Switches Induced by Incorporation of D-LEFs.**

**Table S263. Orbital Energies and Philicity Parameters of VIII<sub>[1-4][b-e]</sub> in Gas.** All quantities given in eV.

| Species                         | HOMO       | LUMO      | CHI      | ETA      | GEI      | N         | ΔGEI                                | ΔN                                |
|---------------------------------|------------|-----------|----------|----------|----------|-----------|-------------------------------------|-----------------------------------|
| VIII <sub>1b</sub> <sup>a</sup> | -8.925064  | -0.950494 | 4.937779 | 7.974570 | 1.528713 | 1.998404  |                                     |                                   |
| VIII <sub>1c</sub>              | -3.402512  | 1.826428  | 0.788042 | 5.228941 | 0.059382 | 7.520956  | -1.469331<br>(-0.9135) <sup>b</sup> | 5.522552<br>(3.7065) <sup>b</sup> |
| VIII <sub>1d</sub>              | -7.108431  | -0.242453 | 3.675442 | 6.865978 | 0.983755 | 3.815037  |                                     |                                   |
| VIII <sub>1e</sub>              | -11.053811 | -3.681701 | 7.367756 | 7.372110 | 3.681702 | -0.130343 | 2.697948                            | -3.945379                         |
| VIII <sub>2b</sub>              | -7.139452  | -0.394021 | 3.766737 | 6.745431 | 1.051697 | 3.784016  |                                     |                                   |
| VIII <sub>2c</sub>              | -3.782655  | 1.991057  | 0.895799 | 5.773713 | 0.069492 | 7.140813  | -0.982205                           | 3.356797                          |
| VIII <sub>2d</sub>              | -6.939449  | -0.293067 | 3.616258 | 6.646382 | 0.983792 | 3.984020  |                                     |                                   |
| VIII <sub>2e</sub>              | -10.257606 | -3.763879 | 7.010743 | 6.493726 | 3.784461 | 0.665863  | 2.800669                            | -3.318157                         |
| VIII <sub>3b</sub>              | -7.166936  | -0.334700 | 3.750818 | 6.832236 | 1.029578 | 3.756532  |                                     |                                   |
| VIII <sub>3c</sub>              | -3.827010  | 1.846293  | 0.990359 | 5.673303 | 0.086441 | 7.096458  | -0.943137                           | 3.339926                          |
| VIII <sub>3d</sub>              | -6.973463  | -0.272114 | 3.622788 | 6.701349 | 0.979250 | 3.950005  |                                     |                                   |
| VIII <sub>3e</sub>              | -10.275293 | -3.828643 | 7.051968 | 6.446650 | 3.857061 | 0.648175  | 2.877811                            | -3.301830                         |
| VIII <sub>4b</sub>              | -7.312517  | -0.273202 | 3.792860 | 7.039314 | 1.021817 | 3.610951  |                                     |                                   |
| VIII <sub>4c</sub>              | -3.668095  | 1.728467  | 0.969814 | 5.396563 | 0.087142 | 7.255373  | -0.934675                           | 3.644421                          |
| VIII <sub>4d</sub>              | -7.055097  | -0.223406 | 3.639251 | 6.831692 | 0.969317 | 3.868371  |                                     |                                   |
| VIII <sub>4e</sub>              | -10.847004 | -3.600611 | 7.223808 | 7.246393 | 3.600646 | 0.076464  | 2.631329                            | -3.791907                         |

<sup>a</sup> Forms a weak C-B interaction; <sup>b</sup> A corrected switch, calculated relative to the unsubstituted molecule, see S10.

**Table S264. Orbital Energies and Philicity Parameters of VIII<sub>[1-4][b-e]</sub> in SMD Toluene.** All quantities given in eV.

| Species                         | HOMO      | LUMO      | CHI      | ETA      | GEI      | N        | ΔGEI                                | ΔN                                |
|---------------------------------|-----------|-----------|----------|----------|----------|----------|-------------------------------------|-----------------------------------|
| VIII <sub>1b</sub> <sup>a</sup> | -8.852409 | -0.754028 | 4.803219 | 8.098382 | 1.424415 | 1.787516 |                                     |                                   |
| VIII <sub>1c</sub>              | -5.763372 | 0.823417  | 2.469978 | 6.586789 | 0.463108 | 4.876553 | -0.961307<br>(-0.4716) <sup>b</sup> | 3.089037<br>(1.2117) <sup>b</sup> |
| VIII <sub>1d</sub>              | -7.049111 | -0.102859 | 3.575985 | 6.946252 | 0.920473 | 3.590815 |                                     |                                   |
| VIII <sub>1e</sub>              | -9.016222 | -1.538532 | 5.277377 | 7.477690 | 1.862253 | 1.623704 | 0.941781                            | -1.967111                         |
| VIII <sub>2b</sub>              | -7.248570 | -0.218235 | 3.733403 | 7.030335 | 0.991297 | 3.391356 |                                     |                                   |
| VIII <sub>2c</sub>              | -5.864871 | 0.853893  | 2.505489 | 6.718764 | 0.467160 | 4.775055 | -0.524137                           | 1.383699                          |
| VIII <sub>2d</sub>              | -7.123398 | -0.127077 | 3.625237 | 6.996320 | 0.939233 | 3.516528 |                                     |                                   |
| VIII <sub>2e</sub>              | -8.452674 | -1.495266 | 4.973970 | 6.957408 | 1.777988 | 2.187252 | 0.838755                            | -1.329276                         |
| VIII <sub>3b</sub>              | -7.246121 | -0.183949 | 3.715035 | 7.062172 | 0.977142 | 3.393805 |                                     |                                   |
| VIII <sub>3c</sub>              | -5.856707 | 0.842193  | 2.507257 | 6.698900 | 0.469207 | 4.783218 | -0.507935                           | 1.389414                          |
| VIII <sub>3d</sub>              | -7.132922 | -0.118370 | 3.625646 | 7.014552 | 0.937003 | 3.507004 |                                     |                                   |
| VIII <sub>3e</sub>              | -8.484784 | -1.563022 | 5.023903 | 6.921761 | 1.823206 | 2.155142 | 0.886204                            | -1.351862                         |
| VIII <sub>4b</sub>              | -7.384355 | -0.144220 | 3.764288 | 7.240135 | 0.978563 | 3.255571 |                                     |                                   |
| VIII <sub>4c</sub>              | -5.898341 | 0.740966  | 2.578687 | 6.639307 | 0.500777 | 4.741585 | -0.477786                           | 1.486014                          |
| VIII <sub>4d</sub>              | -7.183263 | -0.083267 | 3.633265 | 7.099996 | 0.929621 | 3.456663 |                                     |                                   |
| VIII <sub>4e</sub>              | -8.750095 | -1.408189 | 5.079142 | 7.341905 | 1.756879 | 1.889831 | 0.827258                            | -1.566832                         |

<sup>a</sup> Forms a weak C-B interaction

**Table S265. Orbital Energies and Philicity Parameters of VIII<sub>[1-4][b-e]</sub> in SMD DCM.** All quantities given in eV.

| Species                         | HOMO      | LUMO      | CHI      | ETA      | GEI      | N        | ΔGEI      | ΔN        |
|---------------------------------|-----------|-----------|----------|----------|----------|----------|-----------|-----------|
| VIII <sub>1b</sub> <sup>a</sup> | -8.685331 | -0.644910 | 4.665121 | 8.040422 | 1.353371 | 1.721665 |           |           |
| VIII <sub>1c</sub>              | -6.942170 | 0.241909  | 3.350130 | 7.184079 | 0.781128 | 3.464826 | -0.572243 | 1.743162  |
| VIII <sub>1d</sub>              | -7.508983 | -0.070750 | 3.789866 | 7.438233 | 0.965490 | 2.898013 |           |           |
| VIII <sub>1e</sub>              | -8.152260 | -0.593480 | 4.372870 | 7.558780 | 1.264886 | 2.254736 | 0.299396  | -0.643277 |
| VIII <sub>2b</sub>              | -7.425444 | -0.129798 | 3.777621 | 7.295646 | 0.978010 | 2.981552 |           |           |
| VIII <sub>2c</sub>              | -6.984892 | 0.229936  | 3.377478 | 7.214828 | 0.790549 | 3.422104 | -0.187460 | 0.440552  |
| VIII <sub>2d</sub>              | -7.374287 | -0.056055 | 3.715171 | 7.318231 | 0.943021 | 3.032709 |           |           |
| VIII <sub>2e</sub>              | -7.808853 | -0.564908 | 4.186881 | 7.243944 | 1.209974 | 2.598144 | 0.266953  | -0.434566 |
| VIII <sub>3b</sub>              | -7.424900 | -0.108846 | 3.766873 | 7.316054 | 0.969739 | 2.982096 |           |           |
| VIII <sub>3c</sub>              | -6.958225 | 0.227487  | 3.365369 | 7.185712 | 0.788071 | 3.448772 | -0.181668 | 0.466675  |
| VIII <sub>3d</sub>              | -7.346531 | -0.030749 | 3.688640 | 7.315782 | 0.929912 | 3.060465 |           |           |
| VIII <sub>3e</sub>              | -7.829261 | -0.541507 | 4.185384 | 7.287754 | 1.201841 | 2.577735 | 0.271929  | -0.482730 |
| VIII <sub>4b</sub>              | -7.532929 | -0.084900 | 3.808914 | 7.448030 | 0.973937 | 2.874067 |           |           |
| VIII <sub>4c</sub>              | -7.030879 | 0.225855  | 3.402512 | 7.256733 | 0.797679 | 3.376117 | -0.176258 | 0.502050  |
| VIII <sub>4d</sub>              | -7.342177 | -0.026123 | 3.684150 | 7.316054 | 0.927615 | 3.064819 |           |           |
| VIII <sub>4e</sub>              | -8.012394 | -0.439464 | 4.225929 | 7.572930 | 1.179099 | 2.394602 | 0.251485  | -0.670217 |

<sup>a</sup> Forms a weak C-B interaction**Table S266. Orbital Energies and Philicity Parameters of VIII<sub>[1-4][b-e]</sub> in SMD MeCN.** All quantities given in eV.

| Species                         | HOMO      | LUMO      | CHI      | ETA      | GEI      | N        | ΔGEI      | ΔN        |
|---------------------------------|-----------|-----------|----------|----------|----------|----------|-----------|-----------|
| VIII <sub>1b</sub> <sup>a</sup> | -8.630092 | -0.612801 | 4.621446 | 8.017292 | 1.331981 | 1.690644 |           |           |
| VIII <sub>1c</sub>              | -7.230883 | 0.040273  | 3.595305 | 7.271156 | 0.888870 | 3.089853 | -0.443112 | 1.399210  |
| VIII <sub>1d</sub>              | -7.614291 | -0.111839 | 3.863065 | 7.502452 | 0.994560 | 2.706445 |           |           |
| VIII <sub>1e</sub>              | -7.950896 | -0.357013 | 4.153955 | 7.593883 | 1.136134 | 2.369840 | 0.141575  | -0.336605 |
| VIII <sub>2b</sub>              | -7.510616 | -0.112111 | 3.811363 | 7.398505 | 0.981718 | 2.810120 |           |           |
| VIII <sub>2c</sub>              | -7.319864 | 0.023130  | 3.648367 | 7.342994 | 0.906346 | 3.000872 | -0.075372 | 0.190752  |
| VIII <sub>2d</sub>              | -7.456465 | -0.043538 | 3.750002 | 7.412927 | 0.948513 | 2.864271 |           |           |
| VIII <sub>2e</sub>              | -7.671707 | -0.324632 | 3.998170 | 7.347075 | 1.087872 | 2.649029 | 0.139359  | -0.215242 |
| VIII <sub>3b</sub>              | -7.507895 | -0.091702 | 3.799798 | 7.416192 | 0.973442 | 2.812841 |           |           |
| VIII <sub>3c</sub>              | -7.274693 | 0.023130  | 3.625782 | 7.297823 | 0.900700 | 3.046043 | -0.072743 | 0.233202  |
| VIII <sub>3d</sub>              | -7.426805 | -0.008163 | 3.717484 | 7.418641 | 0.931416 | 2.893931 |           |           |
| VIII <sub>3e</sub>              | -7.674973 | -0.243542 | 3.959257 | 7.431431 | 1.054690 | 2.645763 | 0.123274  | -0.248168 |
| VIII <sub>4b</sub>              | -7.602862 | -0.122451 | 3.862657 | 7.480411 | 0.997279 | 2.717874 |           |           |
| VIII <sub>4c</sub>              | -7.358504 | 0.045171  | 3.656667 | 7.403675 | 0.903012 | 2.962232 | -0.094268 | 0.244358  |
| VIII <sub>4d</sub>              | -7.421362 | -0.024490 | 3.722926 | 7.396872 | 0.936895 | 2.899374 |           |           |
| VIII <sub>4e</sub>              | -7.844772 | -0.247896 | 4.046334 | 7.596876 | 1.077602 | 2.475964 | 0.140707  | -0.423409 |

<sup>a</sup> Forms a weak C-B interaction

**Table S267. Orbital Energies and Philicity Parameters of VIII<sub>[1-4][b-e]</sub> in SMD Water.** All quantities given in eV.

| Species                         | HOMO      | LUMO      | CHI      | ETA      | GEI      | N        | ΔGEI      | ΔN        |
|---------------------------------|-----------|-----------|----------|----------|----------|----------|-----------|-----------|
| VIII <sub>1b</sub> <sup>a</sup> | -8.622201 | -0.602732 | 4.612467 | 8.019469 | 1.326450 | 1.671324 |           |           |
| VIII <sub>1c</sub>              | -7.375919 | 0.003810  | 3.686055 | 7.379729 | 0.920562 | 2.917605 | -0.405888 | 1.246282  |
| VIII <sub>1d</sub>              | -7.646673 | -0.109934 | 3.878303 | 7.536739 | 0.997861 | 2.646852 |           |           |
| VIII <sub>1e</sub>              | -7.916065 | -0.310210 | 4.113138 | 7.605856 | 1.112163 | 2.377459 | 0.114302  | -0.269393 |
| VIII <sub>2b</sub>              | -7.530208 | -0.110478 | 3.820343 | 7.419730 | 0.983528 | 2.763317 |           |           |
| VIII <sub>2c</sub>              | -7.379457 | -0.011429 | 3.695443 | 7.368028 | 0.926727 | 2.914068 | -0.056801 | 0.150751  |
| VIII <sub>2d</sub>              | -7.510888 | -0.035375 | 3.773131 | 7.475513 | 0.952210 | 2.782637 |           |           |
| VIII <sub>2e</sub>              | -7.651299 | -0.281366 | 3.966332 | 7.369933 | 1.067295 | 2.642226 | 0.115085  | -0.140411 |
| VIII <sub>3b</sub>              | -7.526398 | -0.088437 | 3.807418 | 7.437961 | 0.974489 | 2.767126 |           |           |
| VIII <sub>3c</sub>              | -7.347620 | -0.005442 | 3.676531 | 7.342177 | 0.920495 | 2.945905 | -0.053994 | 0.178779  |
| VIII <sub>3d</sub>              | -7.485037 | -0.029933 | 3.757485 | 7.455105 | 0.946914 | 2.808488 |           |           |
| VIII <sub>3e</sub>              | -7.653203 | -0.200004 | 3.926604 | 7.453200 | 1.034335 | 2.640321 | 0.087421  | -0.168166 |
| VIII <sub>4b</sub>              | -7.619189 | -0.075376 | 3.847282 | 7.543814 | 0.981041 | 2.674335 |           |           |
| VIII <sub>4c</sub>              | -7.420818 | 0.007347  | 3.706736 | 7.428165 | 0.924851 | 2.872706 | -0.056190 | 0.198371  |
| VIII <sub>4d</sub>              | -7.518507 | -0.031565 | 3.775036 | 7.486942 | 0.951717 | 2.775018 |           |           |
| VIII <sub>4e</sub>              | -7.791437 | -0.162452 | 3.976945 | 7.628985 | 1.036579 | 2.502087 | 0.084862  | -0.272930 |

<sup>a</sup> Forms a weak C-B interaction

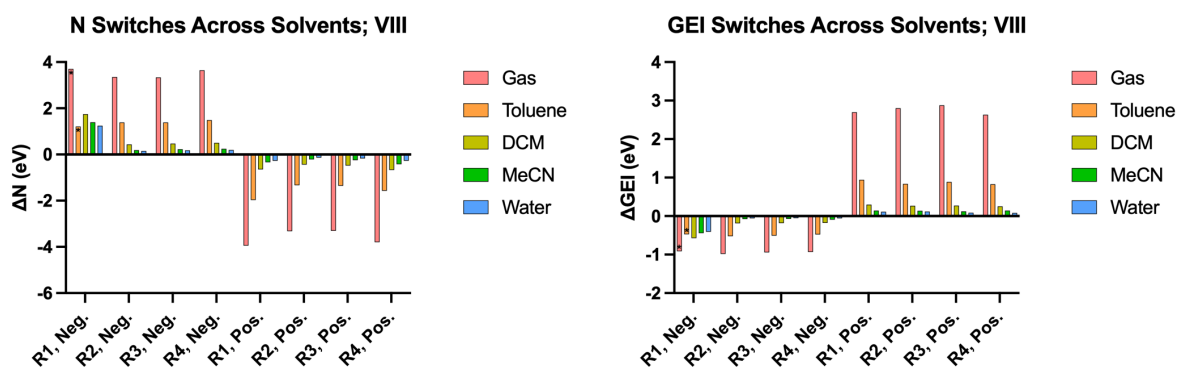

**Figure S147. VIII Nucleophilicity and Electrophilicity Switches Induced by Incorporation of D-LEFs.**

**Table S268. Orbital Energies and Philicity Parameters of IX<sub>[1-2,4][b-e]</sub> in Gas.** All quantities given in eV.

| Species          | HOMO       | LUMO      | CHI      | ETA      | GEI      | N         | ΔGEI      | ΔN        |
|------------------|------------|-----------|----------|----------|----------|-----------|-----------|-----------|
| IX <sub>1b</sub> | -8.559615  | -0.269937 | 4.414776 | 8.289678 | 1.175573 | 2.363853  |           |           |
| IX <sub>1c</sub> | -4.397905  | 2.000854  | 1.198526 | 6.398758 | 0.112246 | 6.525563  | -1.063328 | 4.161710  |
| IX <sub>1d</sub> | -7.815655  | -0.240821 | 4.028238 | 7.574835 | 1.071093 | 3.107813  |           |           |
| IX <sub>1e</sub> | -11.806478 | -3.616394 | 7.711436 | 8.190084 | 3.630380 | -0.883010 | 2.559288  | -3.990822 |
| IX <sub>2b</sub> | -7.956066  | -0.383681 | 4.169873 | 7.572386 | 1.148109 | 2.967402  |           |           |
| IX <sub>2c</sub> | -4.405796  | 2.052555  | 1.176621 | 6.458351 | 0.107182 | 6.517672  | -1.040927 | 3.550270  |
| IX <sub>2d</sub> | -7.667898  | -0.268304 | 3.968101 | 7.399593 | 1.063966 | 3.255571  |           |           |
| IX <sub>2e</sub> | -11.040477 | -3.656394 | 7.348436 | 7.384083 | 3.656481 | -0.117009 | 2.592515  | -3.372580 |
| IX <sub>4b</sub> | -8.464919  | -0.316741 | 4.390830 | 8.148179 | 1.183049 | 2.458549  |           |           |
| IX <sub>4c</sub> | -4.266202  | 1.777448  | 1.244377 | 6.043650 | 0.128108 | 6.657267  | -1.054941 | 4.198717  |
| IX <sub>4d</sub> | -7.786539  | -0.202453 | 3.994496 | 7.584087 | 1.051939 | 3.136929  |           |           |
| IX <sub>4e</sub> | -11.816546 | -3.387002 | 7.601774 | 8.429544 | 3.427645 | -0.893078 | 2.375705  | -4.030007 |

**Table S269. Orbital Energies and Philicity Parameters of IX<sub>[1-2,4][b-e]</sub> in SMD Toluene.** All quantities given in eV.

| Species          | HOMO      | LUMO      | CHI      | ETA      | GEI      | N        | ΔGEI      | ΔN        |
|------------------|-----------|-----------|----------|----------|----------|----------|-----------|-----------|
| IX <sub>1b</sub> | -8.463559 | -0.126805 | 4.295182 | 8.336754 | 1.106461 | 2.176367 |           |           |
| IX <sub>1c</sub> | -6.611279 | 0.900153  | 2.855563 | 7.511432 | 0.542789 | 4.028646 | -0.563672 | 1.852279  |
| IX <sub>1d</sub> | -7.881779 | -0.081362 | 3.981571 | 7.800417 | 1.016157 | 2.758146 |           |           |
| IX <sub>1e</sub> | -9.738956 | -1.433768 | 5.586362 | 8.305188 | 1.878792 | 0.900969 | 0.862635  | -1.857177 |
| IX <sub>2b</sub> | -8.057020 | -0.205446 | 4.131233 | 7.851574 | 1.086858 | 2.582905 |           |           |
| IX <sub>2c</sub> | -6.571006 | 0.922466  | 2.824270 | 7.493473 | 0.532230 | 4.068919 | -0.554628 | 1.486014  |
| IX <sub>2d</sub> | -7.825996 | -0.111839 | 3.968917 | 7.714157 | 1.021000 | 2.813930 |           |           |
| IX <sub>2e</sub> | -9.286975 | -1.486558 | 5.386767 | 7.800417 | 1.859981 | 1.352950 | 0.838981  | -1.460980 |
| IX <sub>4b</sub> | -8.180560 | -0.108301 | 4.144431 | 8.072259 | 1.063910 | 2.459365 |           |           |
| IX <sub>4c</sub> | -6.515223 | 0.764640  | 2.875292 | 7.279863 | 0.567820 | 4.124702 | -0.496090 | 1.665337  |
| IX <sub>4d</sub> | -7.766403 | -0.058777 | 3.912590 | 7.707626 | 0.993066 | 2.873523 |           |           |
| IX <sub>4e</sub> | -9.659227 | -1.351046 | 5.505136 | 8.308182 | 1.823896 | 0.980698 | 0.830831  | -1.892824 |



**Table S270. Orbital Energies and Philicity Parameters of IX<sub>[1-2,4][b-e]</sub> in SMD DCM.** All quantities given in eV.

| Species          | HOMO      | LUMO      | CHI      | ETA      | GEI      | N        | ΔGEI      | ΔN        |
|------------------|-----------|-----------|----------|----------|----------|----------|-----------|-----------|
| IX <sub>1b</sub> | -8.326957 | -0.090342 | 4.208650 | 8.236616 | 1.075243 | 2.080039 |           |           |
| IX <sub>1c</sub> | -7.781369 | 0.264767  | 3.758301 | 8.046136 | 0.877740 | 2.625627 | -0.197504 | 0.545588  |
| IX <sub>1d</sub> | -7.892664 | -0.003810 | 3.948237 | 7.888854 | 0.988012 | 2.514332 |           |           |
| IX <sub>1e</sub> | -8.875811 | -0.378238 | 4.627025 | 8.497573 | 1.259734 | 1.531185 | 0.271721  | -0.983148 |
| IX <sub>2b</sub> | -8.187907 | -0.123812 | 4.155860 | 8.064095 | 1.070868 | 2.219089 |           |           |
| IX <sub>2c</sub> | -7.689122 | 0.249801  | 3.719661 | 7.938923 | 0.871395 | 2.717874 | -0.199473 | 0.498785  |
| IX <sub>2d</sub> | -7.838785 | -0.034014 | 3.936400 | 7.804771 | 0.992678 | 2.568211 |           |           |
| IX <sub>2e</sub> | -8.624650 | -0.400007 | 4.512329 | 8.224643 | 1.237811 | 1.782346 | 0.245134  | -0.785865 |
| IX <sub>4b</sub> | -8.326413 | -0.066940 | 4.196677 | 8.259473 | 1.066175 | 2.080583 |           |           |
| IX <sub>4c</sub> | -7.742729 | 0.245719  | 3.748505 | 7.988448 | 0.879476 | 2.664267 | -0.186700 | 0.583684  |
| IX <sub>4d</sub> | -7.852935 | 0.004354  | 3.924291 | 7.857289 | 0.979985 | 2.554061 |           |           |
| IX <sub>4e</sub> | -8.902750 | -0.353476 | 4.628113 | 8.549275 | 1.252705 | 1.504246 | 0.272719  | -1.049815 |

**Table S271. Orbital Energies and Philicity Parameters of IX<sub>[1-2,4][b-e]</sub> in SMD MeCN.** All quantities given in eV.

| Species          | HOMO      | LUMO      | CHI      | ETA      | GEI      | N        | ΔGEI      | ΔN        |
|------------------|-----------|-----------|----------|----------|----------|----------|-----------|-----------|
| IX <sub>1b</sub> | -8.391721 | -0.072927 | 4.232324 | 8.318794 | 1.076632 | 1.929015 |           |           |
| IX <sub>1c</sub> | -8.120967 | 0.049797  | 4.035585 | 8.170764 | 0.996599 | 2.199769 | -0.080033 | 0.270753  |
| IX <sub>1d</sub> | -7.897834 | 0.009524  | 3.944155 | 7.907358 | 0.983663 | 2.422902 |           |           |
| IX <sub>1e</sub> | -8.671726 | -0.112655 | 4.392190 | 8.559071 | 1.126953 | 1.649010 | 0.143289  | -0.773892 |
| IX <sub>2b</sub> | -8.270358 | -0.105308 | 4.187833 | 8.165050 | 1.073964 | 2.050378 |           |           |
| IX <sub>2c</sub> | -8.010217 | 0.031837  | 3.989190 | 8.042054 | 0.989401 | 2.310519 | -0.084563 | 0.260141  |
| IX <sub>2d</sub> | -7.828173 | -0.018504 | 3.923338 | 7.809669 | 0.985482 | 2.492563 |           |           |
| IX <sub>2e</sub> | -8.476892 | -0.131703 | 4.304298 | 8.345189 | 1.110039 | 1.843844 | 0.124557  | -0.648720 |
| IX <sub>4b</sub> | -8.392265 | -0.065035 | 4.228650 | 8.327230 | 1.073675 | 1.928471 |           |           |
| IX <sub>4c</sub> | -8.095389 | 0.053879  | 4.020755 | 8.149267 | 0.991897 | 2.225347 | -0.081778 | 0.296876  |
| IX <sub>4d</sub> | -7.891575 | 0.014422  | 3.938577 | 7.905997 | 0.981052 | 2.429161 |           |           |
| IX <sub>4e</sub> | -8.693223 | -0.107485 | 4.400354 | 8.585738 | 1.127633 | 1.627513 | 0.146581  | -0.801648 |

**Table S272. Orbital Energies and Philicity Parameters of IX<sub>[1-2,4][b-e]</sub> in SMD Water.** All quantities given in eV.

| Species          | HOMO      | LUMO      | CHI      | ETA      | GEI      | N        | $\Delta$ GEI | $\Delta$ N |
|------------------|-----------|-----------|----------|----------|----------|----------|--------------|------------|
| IX <sub>1b</sub> | -8.397163 | -0.077008 | 4.237086 | 8.320155 | 1.078880 | 1.896362 |              |            |
| IX <sub>1c</sub> | -8.181104 | 0.007891  | 4.086607 | 8.188996 | 1.019683 | 2.112420 | -0.059197    | 0.216058   |
| IX <sub>1d</sub> | -8.064368 | 0.016055  | 4.024156 | 8.080422 | 1.002041 | 2.229157 |              |            |
| IX <sub>1e</sub> | -8.632813 | -0.066668 | 4.349741 | 8.566146 | 1.104362 | 1.660711 | 0.102320     | -0.568446  |
| IX <sub>2b</sub> | -8.287773 | -0.102043 | 4.194908 | 8.185730 | 1.074874 | 2.005752 |              |            |
| IX <sub>2c</sub> | -8.063551 | -0.010612 | 4.037082 | 8.052939 | 1.011931 | 2.229973 | -0.062943    | 0.224222   |
| IX <sub>2d</sub> | -7.957699 | -0.013334 | 3.985516 | 7.944365 | 0.999724 | 2.335826 |              |            |
| IX <sub>2e</sub> | -8.452402 | -0.085988 | 4.269195 | 8.366414 | 1.089238 | 1.841123 | 0.089514     | -0.494703  |
| IX <sub>4b</sub> | -8.400428 | -0.066124 | 4.233276 | 8.334305 | 1.075112 | 1.893096 |              |            |
| IX <sub>4c</sub> | -8.153621 | 0.010885  | 4.071368 | 8.164505 | 1.015128 | 2.139904 | -0.059984    | 0.246807   |
| IX <sub>4d</sub> | -8.031442 | 0.013334  | 4.009054 | 8.044775 | 0.998941 | 2.262083 |              |            |
| IX <sub>4e</sub> | -8.609140 | -0.068028 | 4.338584 | 8.541111 | 1.101924 | 1.684385 | 0.102983     | -0.577698  |

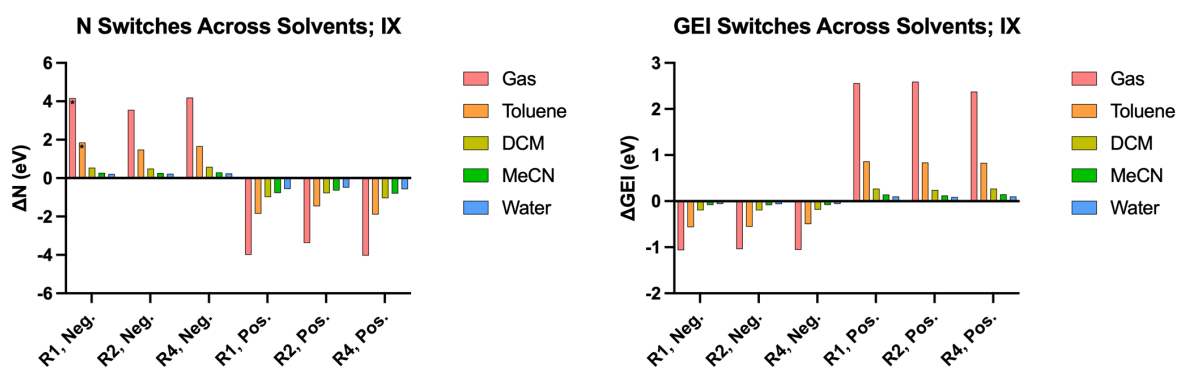

**Figure S148. IX Nucleophilicity and Electrophilicity Switches Induced by Incorporation of D-LEFs.**

### S13. Gibbs Free Energy Surfaces & Components for D-LEF-Substituted and Unsubstituted Benzoin Condensations Across Different Solvents

**Table S273. Energies of Model Benzoin Reaction in SMD Toluene, Uncharged.** Entropy given in J/mol.K. All other quantities given in Hartree.

| Species         | DFT Energy  | ZPVE     | TC       | S          | TS       | H           | G           | G(TOL)      |
|-----------------|-------------|----------|----------|------------|----------|-------------|-------------|-------------|
| I <sub>1a</sub> | -304.705053 | 0.127653 | 0.007850 | 340.587200 | 0.038677 | -304.569550 | -304.608226 | -304.605207 |
| A               | -345.469638 | 0.110744 | 0.007230 | 332.524600 | 0.037761 | -345.351665 | -345.389426 | -345.386407 |
| TS1             | -650.167389 | 0.240537 | 0.014164 | 471.935500 | 0.053593 | -649.912688 | -649.966281 | -649.963262 |
| B               | -650.179357 | 0.242247 | 0.014102 | 468.448900 | 0.053197 | -649.923008 | -649.976205 | -649.973186 |
| TS2             | -765.849026 | 0.292365 | 0.017626 | 534.862700 | 0.060739 | -765.539035 | -765.599774 | -765.596755 |
| C               | -650.189680 | 0.242021 | 0.014518 | 473.107400 | 0.053726 | -649.933141 | -649.986867 | -649.983848 |
| TS3             | -995.669486 | 0.355755 | 0.019878 | 571.439900 | 0.064892 | -995.293852 | -995.358744 | -995.355725 |
| D               | -995.678515 | 0.357885 | 0.020229 | 579.647100 | 0.065824 | -995.300401 | -995.366225 | -995.363206 |
| TS4             | -995.667608 | 0.356312 | 0.020460 | 585.981600 | 0.066544 | -995.290836 | -995.357380 | -995.354361 |
| E               | -690.965686 | 0.226323 | 0.013641 | 463.532600 | 0.052638 | -690.725722 | -690.778360 | -690.775341 |
| Methanol        | -115.670411 | 0.051294 | 0.004281 | 238.059600 | 0.027034 | -115.614836 | -115.641870 | -115.638851 |

**Table S274. Model Benzoin Reaction Gibbs Free Energy Surface in SMD Toluene.** Energies given in Hartree, Relative energies given in kJ/mol.

|             | Starting Materials | TS1              | B                | TS2              | C                | TS3              | D                | TS4              | E                |
|-------------|--------------------|------------------|------------------|------------------|------------------|------------------|------------------|------------------|------------------|
| Energy      | 1111.016<br>8737   | 1110.9885<br>212 | 1110.9984<br>452 | 1110.9831<br>628 | 1111.0091<br>072 | 1110.9945<br>768 | 1111.0020<br>578 | 1110.9932<br>128 | 1111.019<br>4002 |
| Rel. Energy | 0.00               | 74.44            | 48.38            | 88.51            | 20.39            | 58.54            | 38.90            | 62.12            | -6.63            |

**Table S275. Energies of Model Benzoin Reaction in SMD Toluene, I<sub>1c</sub> (Anionic Charge, Position 1).** Entropy given in J/mol.K. All other quantities given in Hartree.

| Species         | DFT Energy   | ZPVE     | TC       | S          | TS       | H            | G            | G(TOL)      |
|-----------------|--------------|----------|----------|------------|----------|--------------|--------------|-------------|
| I <sub>1c</sub> | -628.706663  | 0.130244 | 0.011205 | 415.973200 | 0.047238 | -628.565215  | -628.612452  | -628.609433 |
| TS1             | -974.172100  | 0.242677 | 0.017642 | 539.267900 | 0.061239 | -973.911781  | -973.973019  | -973.970000 |
| B               | -974.198396  | 0.246054 | 0.017087 | 524.661700 | 0.059580 | -973.935255  | -973.994835  | -973.991816 |
| TS2             | -1089.866859 | 0.294538 | 0.021097 | 602.190200 | 0.068384 | -1089.551223 | -1089.619608 | -           |
| C               | -974.197461  | 0.244172 | 0.017979 | 541.487500 | 0.061491 | -973.935310  | -973.996801  | 1089.616589 |
| TS3             | -1319.685272 | 0.358774 | 0.022215 | 611.246800 | 0.069413 | -1319.304283 | -1319.373695 | -973.993782 |
| D               | -1319.695822 | 0.360404 | 0.023697 | 646.436100 | 0.073409 | -1319.311721 | -1319.385129 | -           |
| TS4             | -1319.676363 | 0.358937 | 0.023868 | 649.858800 | 0.073797 | -1319.293558 | -1319.367356 | 1319.370676 |
|                 |              |          |          |            |          |              |              | 1319.382110 |
|                 |              |          |          |            |          |              |              | -           |
|                 |              |          |          |            |          |              |              | 1319.364337 |

**Table S276. Model Benzoin Reaction Gibbs Free Energy Surface in SMD Toluene, I<sub>1c</sub> (Anionic Charge, Position 1).** Energies given in Hartree, Relative energies given in kJ/mol.

|             | Starting Materials | TS1       | B         | TS2       | C         | TS3       | D         | TS4       | E        |
|-------------|--------------------|-----------|-----------|-----------|-----------|-----------|-----------|-----------|----------|
| Energy      | -                  | -         | -         | -         | -         | -         | -         | -         | -        |
|             | 1435.021           | 1434.9952 | 1435.0170 | 1435.0029 | 1435.0190 | 1435.0095 | 1435.0209 | 1435.0031 | 1435.023 |
| Rel. Energy | 100                | 59        | 75        | 97        | 41        | 28        | 62        | 89        | 626      |
|             | 0.00               | 67.84     | 10.57     | 47.53     | 5.40      | 30.38     | 0.36      | 47.02     | -6.63    |

**Table S277. Energies of Model Benzoin Reaction in SMD Toluene, I<sub>2c</sub> (Anionic Charge, Position 2).** Entropy given in J/mol.K. All other quantities given in Hartree.

| Species         | DFT Energy   | ZPVE     | TC       | S          | TS       | H            | G            | G(TOL)           |
|-----------------|--------------|----------|----------|------------|----------|--------------|--------------|------------------|
| I <sub>2c</sub> | -668.008859  | 0.158104 | 0.012740 | 442.979600 | 0.050304 | -667.838014  | -667.888318  | -667.885299      |
| TS1             | -1013.475881 | 0.270908 | 0.019086 | 564.796100 | 0.064138 | -1013.185887 | -1013.250025 | -<br>1013.247006 |
| B               | -1013.496304 | 0.273236 | 0.018865 | 557.199800 | 0.063275 | -1013.204204 | -1013.267479 | -<br>1013.264460 |
| TS2             | -1129.166345 | 0.322744 | 0.022610 | 627.403300 | 0.071247 | -1128.820991 | -1128.892239 | -<br>1128.889220 |
| C               | -1013.497918 | 0.272367 | 0.019433 | 566.227500 | 0.064300 | -1013.206117 | -1013.270418 | -<br>1013.267399 |
| TS3             | -1358.983601 | 0.386203 | 0.024977 | 663.040900 | 0.075294 | -1358.572421 | -1358.647716 | -<br>1358.644697 |
| D               | -1358.995128 | 0.388756 | 0.025042 | 667.386300 | 0.075788 | -1358.581330 | -1358.657118 | -<br>1358.654099 |
| TS4             | -1358.975687 | 0.386528 | 0.025543 | 679.526600 | 0.077167 | -1358.563616 | -1358.640783 | -<br>1358.637764 |

**Table S278. Model Benzoin Reaction Gibbs Free Energy Surface in SMD Toluene, I<sub>2c</sub> (Anionic Charge, Position 2).** Energies given in Hartree, Relative energies given in kJ/mol.

|             | Starting Materials   | TS1                  | B                    | TS2                  | C                    | TS3                  | D                    | TS4                  | E                    |
|-------------|----------------------|----------------------|----------------------|----------------------|----------------------|----------------------|----------------------|----------------------|----------------------|
| Energy      | -<br>1474.296<br>966 | -<br>1474.2722<br>65 | -<br>1474.2897<br>19 | -<br>1474.2756<br>28 | -<br>1474.2926<br>58 | -<br>1474.2835<br>49 | -<br>1474.2929<br>51 | -<br>1474.2766<br>16 | -<br>1474.299<br>492 |
| Rel. Energy | 0.00                 | 64.85                | 19.03                | 56.02                | 11.31                | 35.23                | 10.54                | 53.43                | -6.63                |

**Table S279. Energies of Model Benzoin Reaction in SMD Toluene, I<sub>1e</sub> (Cationic Charge, Position 1).** Entropy given in J/mol.K. All other quantities given in Hartree.

| Species         | DFT Energy   | ZPVE     | TC       | S          | TS       | H            | G            | G(TOL)           |
|-----------------|--------------|----------|----------|------------|----------|--------------|--------------|------------------|
| I <sub>1e</sub> | -478.341450  | 0.244814 | 0.012518 | 433.277900 | 0.049203 | -478.084118  | -478.133321  | -478.130302      |
| TS1             | -823.808147  | 0.359217 | 0.018215 | 541.302000 | 0.061470 | -823.430715  | -823.492185  | -823.489166      |
| B               | -823.820830  | 0.361872 | 0.018007 | 533.448200 | 0.060578 | -823.440951  | -823.491529  | -823.488510      |
| TS2             | -939.478948  | 0.411056 | 0.021680 | 604.993400 | 0.068703 | -939.046212  | -939.114915  | -939.111896      |
| C               | -823.828108  | 0.359499 | 0.018979 | 550.241300 | 0.062485 | -823.449630  | -823.512115  | -823.509096      |
| TS3             | -1169.291588 | 0.475120 | 0.024073 | 640.733600 | 0.072761 | -1168.792395 | -1168.865156 | -<br>1168.862137 |
| D               | -1169.312809 | 0.477266 | 0.024470 | 648.946300 | 0.073694 | -1168.811073 | -1168.884767 | -<br>1168.881748 |
| TS4             | -1169.307998 | 0.474643 | 0.024702 | 655.719400 | 0.074463 | -1168.808653 | -1168.883116 | -<br>1168.880097 |

**Table S280. Model Benzoin Reaction Gibbs Free Energy Surface in SMD Toluene, I<sub>1e</sub> (Cationic Charge, Position 1).** Energies given in Hartree, Relative energies given in kJ/mol.

|             | Starting Materials   | TS1                  | B                    | TS2                  | C                    | TS3                  | D                    | TS4                  | E                    |
|-------------|----------------------|----------------------|----------------------|----------------------|----------------------|----------------------|----------------------|----------------------|----------------------|
| Energy      | -<br>1284.541<br>969 | -<br>1284.5144<br>25 | -<br>1284.5137<br>69 | -<br>1284.4983<br>04 | -<br>1284.5343<br>55 | -<br>1284.5009<br>89 | -<br>1284.5206<br>00 | -<br>1284.5189<br>49 | -<br>1284.544<br>495 |
| Rel. Energy | 0.00                 | 72.32                | 74.04                | 114.64               | 19.99                | 107.59               | 56.10                | 60.44                | -6.63                |

**Table S281. Energies of Model Benzoin Reaction in SMD Toluene, I<sub>2e</sub> (Cationic Charge, Position 2).** Entropy given in J/mol.K. All other quantities given in Hartree.

| Species         | DFT Energy   | ZPVE     | TC       | S          | TS       | H            | G            | G(TOL)      |
|-----------------|--------------|----------|----------|------------|----------|--------------|--------------|-------------|
| I <sub>2e</sub> | -517.635458  | 0.273552 | 0.013697 | 451.407300 | 0.051261 | -517.348210  | -517.399471  | -517.396452 |
| TS1             | -863.097740  | 0.388747 | 0.019379 | 559.913000 | 0.063583 | -862.689613  | -862.753196  | -862.750177 |
| B               | -863.099465  | 0.389779 | 0.019612 | 563.358400 | 0.063975 | -862.690075  | -862.754049  | -862.751030 |
| TS2             | -978.769316  | 0.440511 | 0.022789 | 619.807500 | 0.070385 | -978.306015  | -978.376400  | -978.373381 |
| C               | -863.123535  | 0.389644 | 0.020193 | 573.111700 | 0.065082 | -862.713698  | -862.778780  | -862.775761 |
| TS3             | -1208.587316 | 0.507535 | 0.024664 | 651.768900 | 0.074014 | -1208.055117 | -1208.129131 | -           |
| D               | -1208.601090 | 0.506810 | 0.025561 | 668.472800 | 0.075911 | -1208.068720 | -1208.144631 | -           |
| TS4             | -1208.591226 | 0.503773 | 0.025815 | 673.735700 | 0.076509 | -1208.061638 | -1208.138147 | -           |
|                 |              |          |          |            |          |              |              | 1208.126112 |
|                 |              |          |          |            |          |              |              | 1208.141612 |
|                 |              |          |          |            |          |              |              | 1208.135128 |

**Table S282. Model Benzoin Reaction Gibbs Free Energy Surface in SMD Toluene, I<sub>2e</sub> (Cationic Charge, Position 2).** Energies given in Hartree, Relative energies given in kJ/mol.

|             | Starting Materials | TS1       | B         | TS2       | C         | TS3       | D         | TS4       | E        |
|-------------|--------------------|-----------|-----------|-----------|-----------|-----------|-----------|-----------|----------|
| Energy      | 1323.808           | 1323.7754 | 1323.7762 | 1323.7597 | 1323.8010 | 1323.7649 | 1323.7804 | 1323.7739 | 1323.810 |
| Rel. Energy | 0.00               | 85.81     | 83.57     | 126.89    | 18.64     | 113.30    | 72.61     | 89.63     | -6.63    |

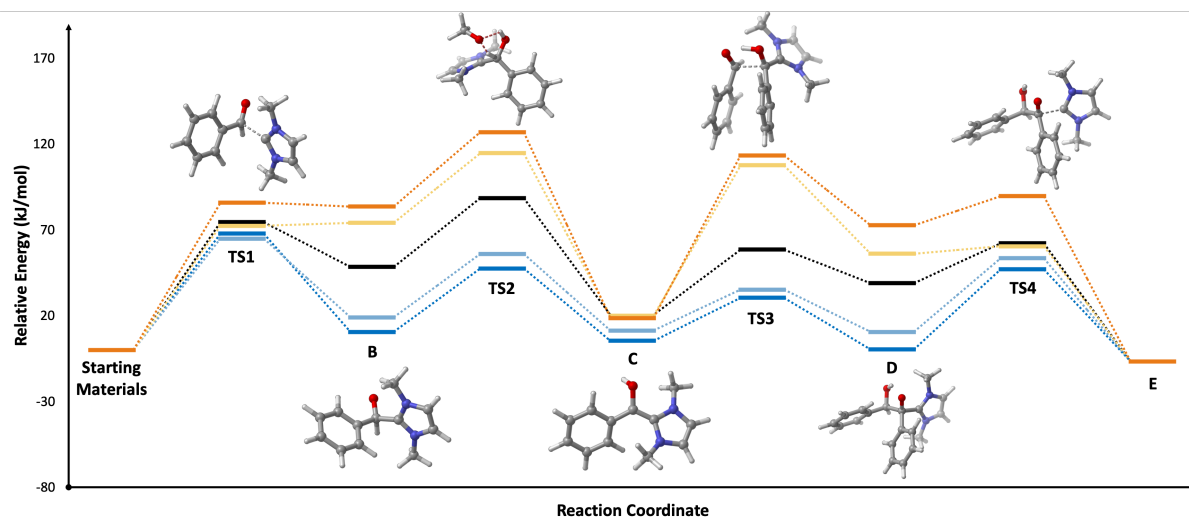

**Figure S149.** Gibbs Free Energy (kJ/mol) at 298.15 K of the benzoin condensation catalysed by I1a (black), I1b (dark blue), I1c (light blue), I1d (yellow), and I1e (orange) at the SMD//M06-2X/cc-pVDZ level of theory in SMD Toluene.



**Table S283. Energies of Model Benzoin Reaction in SMD DCM, Uncharged.** Entropy given in J/mol.K. All other quantities given in Hartree.

| Species         | DFT Energy  | ZPVE     | TC       | S          | TS       | H           | G           | G(DCM)      |
|-----------------|-------------|----------|----------|------------|----------|-------------|-------------|-------------|
| I <sub>1a</sub> | -304.709700 | 0.127492 | 0.007901 | 342.529900 | 0.038897 | -304.574307 | -304.613204 | -304.610185 |
| A               | -345.471814 | 0.110671 | 0.007232 | 332.557500 | 0.037765 | -345.353911 | -345.391676 | -345.388657 |
| TS1             | -650.174361 | 0.240323 | 0.014207 | 472.721700 | 0.053682 | -649.919831 | -649.973513 | -649.970494 |
| B               | -650.191020 | 0.242238 | 0.014098 | 468.158400 | 0.053164 | -649.934684 | -649.987847 | -649.984828 |
| TS2             | -765.859645 | 0.291767 | 0.017762 | 537.609500 | 0.061051 | -765.550117 | -765.611167 | -765.608148 |
| C               | -650.195757 | 0.241736 | 0.014516 | 473.108700 | 0.053726 | -649.939505 | -649.993230 | -649.990211 |
| TS3             | -995.678824 | 0.355139 | 0.020057 | 574.278600 | 0.065215 | -995.303628 | -995.368843 | -995.365824 |
| D               | -995.690525 | 0.357785 | 0.020195 | 579.178900 | 0.065771 | -995.312546 | -995.378317 | -995.375298 |
| TS4             | -995.675293 | 0.356019 | 0.020539 | 587.949800 | 0.066767 | -995.298736 | -995.365503 | -995.362484 |
| E               | -690.969987 | 0.225935 | 0.013713 | 464.819100 | 0.052785 | -690.730338 | -690.783123 | -690.780104 |
| Methanol        | -115.672326 | 0.051276 | 0.004262 | 237.773600 | 0.027001 | -115.616788 | -115.643790 | -115.640771 |

**Table S284. Model Benzoin Reaction Gibbs Free Energy Surface in SMD DCM.** Energies given in Hartree, Relative energies given in kJ/mol.

|             | Starting Materials | TS1         | B           | TS2         | C           | TS3         | D           | TS4         | E           |
|-------------|--------------------|-------------|-------------|-------------|-------------|-------------|-------------|-------------|-------------|
| Energy      | 1111.028272        | 1110.999923 | 1111.014257 | 1110.996806 | 1111.019640 | 1111.006596 | 1111.016070 | 1111.003256 | 1111.031061 |
| Rel. Energy | 0.00               | 74.43       | 36.79       | 82.61       | 22.66       | 56.91       | 32.04       | 65.68       | -7.32       |

**Table S285. Energies of Model Benzoin Reaction in SMD DCM, I<sub>1c</sub> (Anionic Charge, Position 1).** Entropy given in J/mol.K. All other quantities given in Hartree.

| Species         | DFT Energy   | ZPVE     | TC       | S          | TS       | H            | G            | G(DCM)      |
|-----------------|--------------|----------|----------|------------|----------|--------------|--------------|-------------|
| I <sub>1c</sub> | -628.737890  | 0.130142 | 0.011207 | 415.956000 | 0.047236 | -628.596541  | -628.643777  | -628.640758 |
| TS1             | -974.203696  | 0.242551 | 0.017649 | 539.273700 | 0.061240 | -973.943497  | -974.004736  | -974.001717 |
| B               | -974.228192  | 0.244811 | 0.017461 | 533.708200 | 0.060607 | -973.965919  | -974.026527  | -974.023508 |
| TS2             | -1089.896519 | 0.294074 | 0.021220 | 604.600800 | 0.068658 | -1089.581225 | -1089.649883 | -           |
| C               | -974.226373  | 0.243825 | 0.018027 | 542.821000 | 0.061642 | -973.964521  | -974.026163  | 1089.646864 |
| TS3             | -1319.712659 | 0.357479 | 0.023706 | 641.997100 | 0.072905 | -1319.331474 | -1319.404378 | -974.023144 |
| D               | -1319.725935 | 0.359975 | 0.023747 | 647.297200 | 0.073507 | -1319.342213 | -1319.415720 | -           |
| TS4             | -1319.706314 | 0.358387 | 0.024005 | 653.569100 | 0.074219 | -1319.323922 | -1319.398141 | 1319.401359 |
|                 |              |          |          |            |          |              |              | -           |
|                 |              |          |          |            |          |              |              | 1319.412701 |
|                 |              |          |          |            |          |              |              | -           |
|                 |              |          |          |            |          |              |              | 1319.395122 |

**Table S286. Model Benzoin Reaction Gibbs Free Energy Surface in SMD DCM, I<sub>1c</sub> (Anionic Charge, Position 1).** Energies given in Hartree, Relative energies given in kJ/mol.

|             | Starting Materials | TS1         | B           | TS2         | C           | TS3         | D           | TS4         | E           |
|-------------|--------------------|-------------|-------------|-------------|-------------|-------------|-------------|-------------|-------------|
| Energy      | 1435.058845        | 1435.031146 | 1435.052937 | 1435.035522 | 1435.052573 | 1435.042131 | 1435.053473 | 1435.035894 | 1435.061634 |
| Rel. Energy | 0.00               | 72.72       | 15.51       | 61.23       | 16.47       | 43.88       | 14.10       | 60.26       | -7.32       |

**Table S287. Energies of Model Benzoin Reaction in SMD DCM, I<sub>2c</sub> (Anionic Charge, Position 2).** Entropy given in J/mol.K. All other quantities given in Hartree.

| Species         | DFT Energy   | ZPVE     | TC       | S          | TS       | H            | G            | G(DCM)           |
|-----------------|--------------|----------|----------|------------|----------|--------------|--------------|------------------|
| I <sub>2c</sub> | -668.039313  | 0.157687 | 0.012923 | 448.684900 | 0.050952 | -667.868703  | -667.919655  | -667.916636      |
| TS1             | -1013.506483 | 0.270622 | 0.019161 | 566.426300 | 0.064323 | -1013.216700 | -1013.281023 | -<br>1013.278004 |
| B               | -1013.527051 | 0.272838 | 0.019013 | 560.798000 | 0.063684 | -1013.235200 | -1013.298884 | -<br>1013.295865 |
| TS2             | -1129.195948 | 0.321886 | 0.022820 | 632.455700 | 0.071821 | -1128.851242 | -1128.923063 | -<br>1128.920044 |
| C               | -1013.527436 | 0.272049 | 0.019477 | 567.017000 | 0.064390 | -1013.235910 | -1013.300300 | -<br>1013.297281 |
| TS3             | -1359.012708 | 0.385655 | 0.025047 | 664.046500 | 0.075409 | -1358.602007 | -1358.677415 | -<br>1358.674396 |
| D               | -1359.026050 | 0.388241 | 0.025114 | 669.044700 | 0.075976 | -1358.612694 | -1358.688670 | -<br>1358.685651 |
| TS4             | -1359.006284 | 0.385928 | 0.025651 | 682.016600 | 0.077449 | -1358.594705 | -1358.672155 | -<br>1358.669136 |

**Table S288. Model Benzoin Reaction Gibbs Free Energy Surface in SMD DCM, I<sub>2c</sub> (Anionic Charge, Position 2).** Energies given in Hartree, Relative energies given in kJ/mol.

|             | Starting Materials | TS1            | B              | TS2            | C              | TS3            | D              | TS4            | E             |
|-------------|--------------------|----------------|----------------|----------------|----------------|----------------|----------------|----------------|---------------|
| Energy      | -<br>1474.334      | -<br>1474.3074 | -<br>1474.3252 | -<br>1474.3087 | -<br>1474.3267 | -<br>1474.3151 | -<br>1474.3264 | -<br>1474.3099 | -<br>1474.337 |
| Rel. Energy | 723                | 33             | 94             | 02             | 10             | 68             | 23             | 08             | 512           |
|             | 0.00               | 71.65          | 24.75          | 68.32          | 21.04          | 51.34          | 21.79          | 65.15          | -7.32         |

**Table S289. Energies of Model Benzoin Reaction in SMD DCM, I<sub>1e</sub> (Cationic Charge, Position 1).** Entropy given in J/mol.K. All other quantities given in Hartree.

| Species         | DFT Energy   | ZPVE     | TC       | S          | TS       | H            | G            | G(DCM)      |
|-----------------|--------------|----------|----------|------------|----------|--------------|--------------|-------------|
| I <sub>1e</sub> | -478.371792  | 0.244849 | 0.012396 | 430.461100 | 0.048883 | -478.114547  | -478.163429  | -478.160410 |
| TS1             | -823.837684  | 0.358602 | 0.018395 | 545.246100 | 0.061918 | -823.460687  | -823.522605  | -823.519586 |
| B               | -823.854003  | 0.361392 | 0.018050 | 535.117200 | 0.060768 | -823.474561  | -823.535328  | -823.532309 |
| TS2             | -939.512758  | 0.409670 | 0.022101 | 614.356200 | 0.069766 | -939.080987  | -939.150753  | -939.147734 |
| C               | -823.858456  | 0.359321 | 0.018942 | 549.771600 | 0.062432 | -823.480193  | -823.542625  | -823.539606 |
| TS3             | -1169.324543 | 0.473260 | 0.024581 | 651.951800 | 0.074035 | -1168.826702 | -1168.900737 | -           |
| D               | -1169.347359 | 0.475511 | 0.024905 | 658.200500 | 0.074745 | -1168.846943 | -1168.921688 | -           |
| TS4             | -1169.340006 | 0.473468 | 0.025018 | 662.918600 | 0.075281 | -1168.841521 | -1168.916801 | -           |
|                 |              |          |          |            |          |              |              | 1168.913782 |

**Table S290. Model Benzoin Reaction Gibbs Free Energy Surface in SMD DCM, I<sub>1e</sub> (Cationic Charge, Position 1).** Energies given in Hartree, Relative energies given in kJ/mol.

|             | Starting Materials | TS1         | B           | TS2         | C           | TS3         | D           | TS4         | E           |
|-------------|--------------------|-------------|-------------|-------------|-------------|-------------|-------------|-------------|-------------|
| Energy      | 1284.578497        | 1284.549015 | 1284.561738 | 1284.536392 | 1284.569035 | 1284.538490 | 1284.559441 | 1284.554554 | 1284.581286 |
| Rel. Energy | 0.00               | 77.40       | 44.00       | 110.55      | 24.84       | 105.04      | 50.03       | 62.86       | -7.32       |

**Table S291. Energies of Model Benzoin Reaction in SMD DCM, I<sub>2e</sub> (Cationic Charge, Position 2).** Entropy given in J/mol.K. All other quantities given in Hartree.

| Species         | DFT Energy   | ZPVE     | TC       | S          | TS       | H            | G            | G(DCM)           |
|-----------------|--------------|----------|----------|------------|----------|--------------|--------------|------------------|
| I <sub>2e</sub> | -517.668136  | 0.273361 | 0.013885 | 457.146700 | 0.051913 | -517.380891  | -517.432804  | -517.429785      |
| TS1             | -863.131513  | 0.386710 | 0.020051 | 575.392900 | 0.065341 | -862.724752  | -862.790094  | -862.787075      |
| B               | -863.144328  | 0.388996 | 0.019778 | 567.237600 | 0.064415 | -862.735554  | -862.799969  | -862.796950      |
| TS2             | -978.813110  | 0.438392 | 0.023494 | 635.111400 | 0.072123 | -978.351224  | -978.423347  | -978.420328      |
| C               | -863.156114  | 0.387546 | 0.020491 | 577.632700 | 0.065596 | -862.748077  | -862.813673  | -862.810654      |
| TS3             | -1208.630372 | 0.500674 | 0.026097 | 678.477000 | 0.077047 | -1208.103600 | -1208.180648 | -<br>1208.177629 |
| D               | -1208.643397 | 0.503970 | 0.026079 | 678.140300 | 0.077009 | -1208.113348 | -1208.190357 | -<br>1208.187338 |
| TS4             | -1208.630307 | 0.502055 | 0.026512 | 689.778300 | 0.078331 | -1208.101740 | -1208.180070 | -<br>1208.177051 |

**Table S292. Model Benzoin Reaction Gibbs Free Energy Surface in SMD DCM, I<sub>2e</sub> (Cationic Charge, Position 2).** Energies given in Hartree, Relative energies given in kJ/mol.

|             | Starting Materials | TS1         | B           | TS2         | C           | TS3         | D           | TS4         | E           |
|-------------|--------------------|-------------|-------------|-------------|-------------|-------------|-------------|-------------|-------------|
| Energy      | -                  | -           | -           | -           | -           | -           | -           | -           | -           |
|             | 1323.847872        | 1323.816504 | 1323.826379 | 1323.808986 | 1323.840083 | 1323.818401 | 1323.828110 | 1323.817823 | 1323.850661 |
| Rel. Energy | 0.00               | 82.36       | 56.43       | 102.09      | 20.45       | 77.38       | 51.88       | 78.89       | -7.32       |

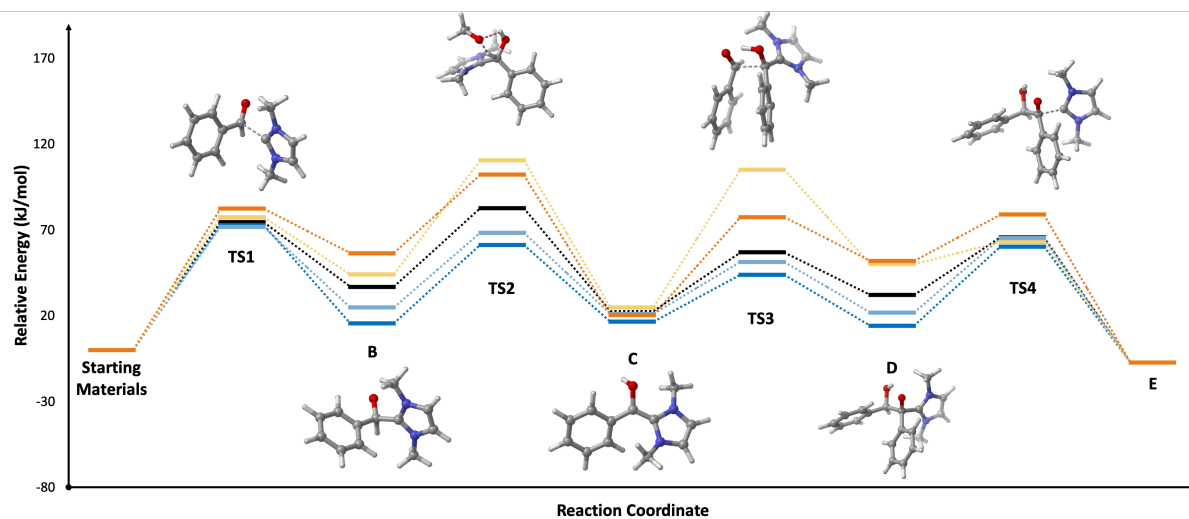

**Figure S150.** Gibbs Free Energy (kJ/mol) at 298.15 K of the benzoin condensation catalysed by I1a (black), I1b (dark blue), I1c (light blue), I1d (yellow), and I1e (orange) at the SMD//M06-2X/cc-pVDZ level of theory in SMD DCM.

**Table S293. Energies of Model Benzoin Reaction in SMD MeCN, Uncharged.** Entropy given in J/mol.K. All other quantities given in Hartree.

| Species         | DFT Energy  | ZPVE     | TC       | S          | TS       | H           | G           | G(MeCN)     |
|-----------------|-------------|----------|----------|------------|----------|-------------|-------------|-------------|
| I <sub>1a</sub> | -304.709991 | 0.127447 | 0.007916 | 343.203200 | 0.038974 | -304.574628 | -304.613602 | -304.610583 |
| A               | -345.471303 | 0.110620 | 0.007243 | 332.845100 | 0.037798 | -345.353439 | -345.391237 | -345.388218 |
| TS1             | -650.174102 | 0.240211 | 0.014216 | 472.801500 | 0.053691 | -649.919675 | -649.973366 | -649.970347 |
| B               | -650.191700 | 0.242146 | 0.014113 | 468.501800 | 0.053203 | -649.935441 | -649.988643 | -649.985624 |
| TS2             | -765.859695 | 0.291427 | 0.017887 | 541.735700 | 0.061519 | -765.550381 | -765.611900 | -765.608881 |
| C               | -650.195019 | 0.241553 | 0.014541 | 473.576800 | 0.053779 | -649.938925 | -649.992704 | -649.989685 |
| TS3             | -995.678986 | 0.354996 | 0.020141 | 576.410300 | 0.065457 | -995.303849 | -995.369306 | -995.366287 |
| D               | -995.691075 | 0.357616 | 0.020202 | 579.564100 | 0.065815 | -995.313257 | -995.379071 | -995.376052 |
| TS4             | -995.674404 | 0.355911 | 0.020529 | 587.572000 | 0.066724 | -995.297964 | -995.364689 | -995.361670 |
| E               | -690.969336 | 0.226358 | 0.013607 | 462.369800 | 0.052506 | -690.729371 | -690.781877 | -690.778858 |
| Methanol        | -115.672411 | 0.051266 | 0.004290 | 238.267300 | 0.027057 | -115.616855 | -115.643912 | -115.640893 |

**Table S294. Model Benzoin Reaction Gibbs Free Energy Surface in SMD MeCN.** Energies given in Hartree, Relative energies given in kJ/mol.

|             | Starting Materials | TS1         | B           | TS2         | C           | TS3         | D           | TS4         | E           |
|-------------|--------------------|-------------|-------------|-------------|-------------|-------------|-------------|-------------|-------------|
| Energy      | 1111.027914        | 1110.999459 | 1111.014736 | 1110.997100 | 1111.018797 | 1111.007181 | 1111.016946 | 1111.002564 | 1111.030335 |
| Rel. Energy | 0.00               | 74.71       | 34.60       | 80.90       | 23.94       | 54.43       | 28.80       | 66.56       | -6.36       |

**Table S295. Energies of Model Benzoin Reaction in SMD MeCN, I<sub>1c</sub> (Anionic Charge, Position 1).** Entropy given in J/mol.K. All other quantities given in Hartree.

| Species         | DFT Energy   | ZPVE     | TC       | S          | TS       | H            | G            | G(MeCN)     |
|-----------------|--------------|----------|----------|------------|----------|--------------|--------------|-------------|
| I <sub>1c</sub> | -628.745741  | 0.129964 | 0.011216 | 416.245200 | 0.047268 | -628.604561  | -628.651829  | -628.648810 |
| TS1             | -974.210957  | 0.242539 | 0.017684 | 540.372400 | 0.061364 | -973.950735  | -974.012099  | -974.009080 |
| B               | -974.233789  | 0.244722 | 0.017458 | 533.624600 | 0.060598 | -973.971608  | -974.032206  | -974.029187 |
| TS2             | -1089.902520 | 0.293981 | 0.021210 | 604.259400 | 0.068619 | -1089.587329 | -1089.655948 | -           |
| C               | -974.232030  | 0.243694 | 0.018042 | 543.201700 | 0.061686 | -973.970294  | -974.031979  | 1089.652929 |
| TS3             | -1319.718485 | 0.357483 | 0.023686 | 642.067300 | 0.072913 | -1319.337316 | -1319.410229 | -974.028960 |
| D               | -1319.732238 | 0.359954 | 0.023737 | 646.138000 | 0.073375 | -1319.348547 | -1319.421922 | -           |
| TS4             | -1319.711732 | 0.357958 | 0.024120 | 656.434000 | 0.074544 | -1319.329654 | -1319.404198 | 1319.407210 |
|                 |              |          |          |            |          |              |              | 1319.418903 |
|                 |              |          |          |            |          |              |              | -           |
|                 |              |          |          |            |          |              |              | 1319.401179 |

**Table S296. Model Benzoin Reaction Gibbs Free Energy Surface in SMD MeCN, I<sub>1c</sub> (Anionic Charge, Position 1).** Energies given in Hartree, Relative energies given in kJ/mol.

|             | Starting Materials | TS1       | B         | TS2       | C         | TS3       | D         | TS4       | E        |
|-------------|--------------------|-----------|-----------|-----------|-----------|-----------|-----------|-----------|----------|
| Energy      | 1435.066           | 1435.0381 | 1435.0582 | 1435.0411 | 1435.0580 | 1435.0481 | 1435.0597 | 1435.0420 | 1435.068 |
| Rel. Energy | 141                | 92        | 99        | 48        | 72        | 04        | 97        | 73        | 562      |
|             | 0.00               | 73.38     | 20.59     | 65.62     | 21.18     | 47.36     | 16.66     | 63.19     | -6.36    |



**Table S297. Energies of Model Benzoin Reaction in SMD MeCN, I<sub>2c</sub> (Anionic Charge, Position 2).** Entropy given in J/mol.K. All other quantities given in Hartree.

| Species         | DFT Energy   | ZPVE     | TC       | S          | TS       | H            | G            | G(MeCN)          |
|-----------------|--------------|----------|----------|------------|----------|--------------|--------------|------------------|
| I <sub>2c</sub> | -668.046662  | 0.157565 | 0.012951 | 449.445400 | 0.051039 | -667.876147  | -667.927186  | -667.924167      |
| TS1             | -1013.512964 | 0.270566 | 0.019166 | 566.489900 | 0.064330 | -1013.223232 | -1013.287562 | -<br>1013.284543 |
| B               | -1013.532725 | 0.272674 | 0.019075 | 562.726800 | 0.063903 | -1013.240976 | -1013.304879 | -<br>1013.301860 |
| TS2             | -1129.201632 | 0.321693 | 0.022880 | 634.236400 | 0.072023 | -1128.857059 | -1128.929083 | -<br>1128.926064 |
| C               | -1013.533134 | 0.271878 | 0.019505 | 567.722700 | 0.064470 | -1013.241751 | -1013.306221 | -<br>1013.303202 |
| TS3             | -1359.018502 | 0.385260 | 0.025199 | 668.201800 | 0.075880 | -1358.608043 | -1358.683923 | -<br>1358.680904 |
| D               | -1359.031621 | 0.388099 | 0.025125 | 669.462800 | 0.076024 | -1358.618396 | -1358.694420 | -<br>1358.691401 |
| TS4             | -1359.011755 | 0.385804 | 0.025637 | 681.615800 | 0.077404 | -1358.600314 | -1358.677717 | -<br>1358.674698 |

**Table S298. Model Benzoin Reaction Gibbs Free Energy Surface in SMD MeCN, I<sub>2c</sub> (Anionic Charge, Position 2).** Energies given in Hartree, Relative energies given in kJ/mol.

|             | Starting Materials   | TS1                  | B                    | TS2                  | C                    | TS3                  | D                    | TS4                  | E                    |
|-------------|----------------------|----------------------|----------------------|----------------------|----------------------|----------------------|----------------------|----------------------|----------------------|
| Energy      | -<br>1474.341<br>498 | -<br>1474.3136<br>55 | -<br>1474.3309<br>72 | -<br>1474.3142<br>83 | -<br>1474.3323<br>14 | -<br>1474.3217<br>98 | -<br>1474.3322<br>95 | -<br>1474.3155<br>92 | -<br>1474.343<br>919 |
| Rel. Energy | 0.00                 | 73.10                | 27.63                | 71.45                | 24.11                | 51.72                | 24.16                | 68.02                | -6.36                |

**Table S299. Energies of Model Benzoin Reaction in SMD MeCN, I<sub>1e</sub> (Cationic Charge, Position 1).** Entropy given in J/mol.K. All other quantities given in Hartree.

| Species         | DFT Energy   | ZPVE     | TC       | S          | TS       | H            | G            | G(MeCN)     |
|-----------------|--------------|----------|----------|------------|----------|--------------|--------------|-------------|
| I <sub>1e</sub> | -478.378885  | 0.244989 | 0.012362 | 429.669200 | 0.048793 | -478.121535  | -478.170328  | -478.167309 |
| TS1             | -823.843390  | 0.358326 | 0.018475 | 547.146800 | 0.062134 | -823.466589  | -823.528722  | -823.525703 |
| B               | -823.860594  | 0.360667 | 0.018327 | 542.415100 | 0.061596 | -823.481600  | -823.543197  | -823.540178 |
| TS2             | -939.519627  | 0.408718 | 0.022327 | 619.405800 | 0.070339 | -939.088582  | -939.158922  | -939.155903 |
| C               | -823.864363  | 0.359180 | 0.018921 | 549.682000 | 0.062421 | -823.486261  | -823.548683  | -823.545664 |
| TS3             | -1169.331428 | 0.472764 | 0.024742 | 655.642400 | 0.074454 | -1168.833921 | -1168.908376 | -           |
| D               | -1169.354885 | 0.475060 | 0.025014 | 661.573500 | 0.075128 | -1168.854811 | -1168.929939 | 1168.905357 |
| TS4             | -1169.345705 | 0.473313 | 0.025091 | 664.221600 | 0.075429 | -1168.847302 | -1168.922730 | -           |
|                 |              |          |          |            |          |              |              | 1168.919711 |

**Table S300. Model Benzoin Reaction Gibbs Free Energy Surface in SMD MeCN, I<sub>1e</sub> (Cationic Charge, Position 1).** Energies given in Hartree, Relative energies given in kJ/mol.

|             | Starting Materials | TS1       | B         | TS2       | C         | TS3       | D         | TS4       | E        |
|-------------|--------------------|-----------|-----------|-----------|-----------|-----------|-----------|-----------|----------|
| Energy      | 1284.584           | 1284.5548 | 1284.5692 | 1284.5441 | 1284.5747 | 1284.5462 | 1284.5678 | 1284.5606 | 1284.587 |
| Rel. Energy | 0.00               | 78.30     | 40.30     | 106.38    | 25.90     | 100.79    | 44.18     | 63.10     | -6.36    |

**Table S301. Energies of Model Benzoin Reaction in SMD MeCN, I<sub>2e</sub> (Cationic Charge, Position 2).** Entropy given in J/mol.K. All other quantities given in Hartree.

| Species         | DFT Energy   | ZPVE     | TC       | S          | TS       | H            | G            | G(MeCN)     |
|-----------------|--------------|----------|----------|------------|----------|--------------|--------------|-------------|
| I <sub>2e</sub> | -517.675981  | 0.273321 | 0.013923 | 458.624300 | 0.052081 | -517.388737  | -517.440818  | -517.437799 |
| TS1             | -863.138760  | 0.386288 | 0.020190 | 578.576800 | 0.065703 | -862.732283  | -862.797985  | -862.794966 |
| B               | -863.154478  | 0.388568 | 0.019928 | 569.976000 | 0.064726 | -862.745983  | -862.810709  | -862.807690 |
| TS2             | -978.823167  | 0.438024 | 0.023613 | 638.039500 | 0.072455 | -978.361530  | -978.433985  | -978.430966 |
| C               | -863.162805  | 0.387357 | 0.020517 | 578.161400 | 0.065656 | -862.754931  | -862.820587  | -862.817568 |
| TS3             | -1208.640059 | 0.501181 | 0.026038 | 677.162800 | 0.076898 | -1208.112840 | -1208.189738 | -           |
| D               | -1208.652644 | 0.503836 | 0.026148 | 679.964500 | 0.077216 | -1208.122661 | -1208.199877 | 1208.186719 |
| TS4             | -1208.637955 | 0.501775 | 0.026644 | 693.061500 | 0.078704 | -1208.109536 | -1208.188240 | 1208.196858 |
|                 |              |          |          |            |          |              |              | -           |
|                 |              |          |          |            |          |              |              | 1208.185221 |

**Table S302. Model Benzoin Reaction Gibbs Free Energy Surface in SMD MeCN, I<sub>2e</sub> (Cationic Charge, Position 2).** Energies given in Hartree, Relative energies given in kJ/mol.

|             | Starting Materials | TS1       | B         | TS2       | C         | TS3       | D         | TS4       | E        |
|-------------|--------------------|-----------|-----------|-----------|-----------|-----------|-----------|-----------|----------|
| Energy      | 1323.855           | 1323.8240 | 1323.8368 | 1323.8191 | 1323.8466 | 1323.8276 | 1323.8377 | 1323.8261 | 1323.857 |
| Rel. Energy | 0.00               | 81.53     | 48.12     | 94.37     | 22.18     | 72.25     | 45.63     | 76.18     | -6.36    |

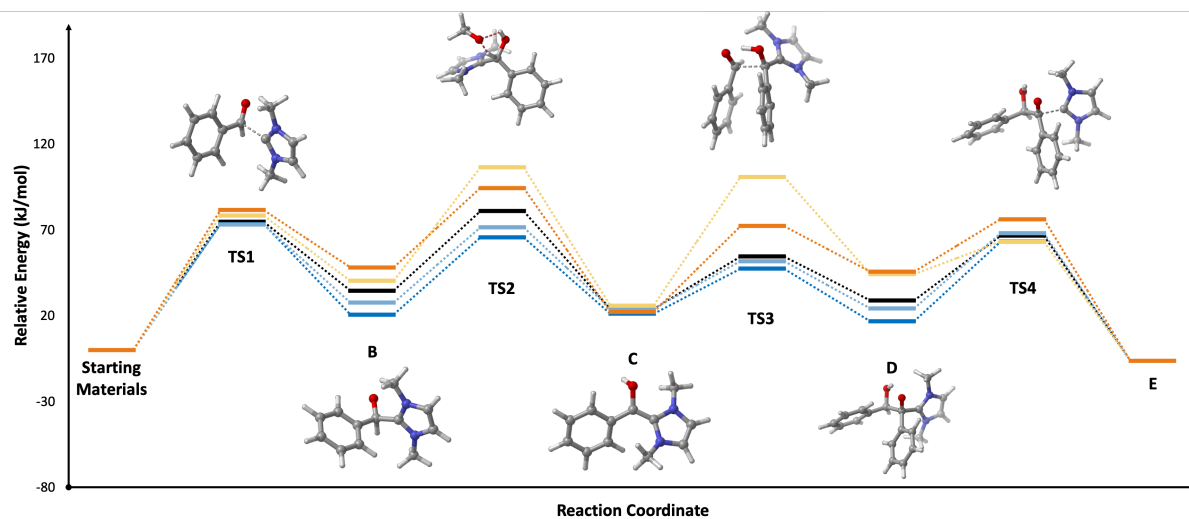

**Figure S151.** Gibbs Free Energy (kJ/mol) at 298.15 K of the benzoin condensation catalysed by I1a (black), I1b (dark blue), I1c (light blue), I1d (yellow), and I1e (orange) at the SMD//M06-2X/cc-pVDZ level of theory in SMD MeCN.

## S14. PhotoNHC Switching Results

We investigated whether the wavelength of light required to activate photochemically active NHC-adducts could be substantially shifted via the incorporation of D-LEFs, in line with previous work by some of us [Blyth, Noble, Russell, and Coote, 2019; Hill and Coote 2018].

We found that for the system below, taken from 10.1002/anie.201914456, we could lower the absorption energy of the photoactive I1a adduct by 0.1644 eV with an anionic D-LEF, and raise it by 0.057 eV in MeCN. We note that these results are smaller than reported in our previous works, above, but consistent with the understanding that these effects are electrostatic, and now operating further from the reactive centre (being now attached to the NHC, rather than directly attached to the reacting substrate). Future work in this area is likely warranted.

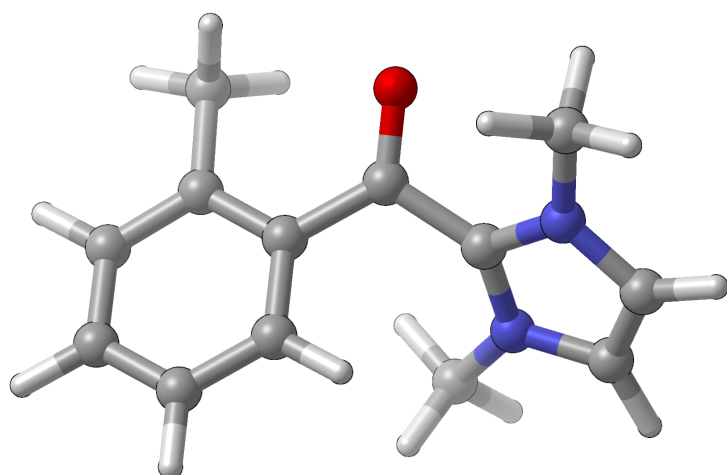

**Figure S152. The PhotoNHC Used.** To investigate the possible role of D-LEF-substituted NHCs in photo-reactivity.

**Table S303. TD-DFT Results. For PhotoNHC with I<sub>1a</sub>.**

| State Name | Energy (eV) | Wavelength (nm) | f-value | Character | Notes      |
|------------|-------------|-----------------|---------|-----------|------------|
| T1         | 3.176       | 390.440         | 0.000   | nπ*       |            |
| T2         | 3.572       | 347.090         | 0.000   | ππ*       | ISC        |
| S1         | 3.654       | 339.310         | 0.002   | nπ*       |            |
| T3         | 3.982       | 311.340         | 0.000   | ππ*       |            |
| T4         | 4.125       | 300.590         | 0.000   | ππ*       |            |
| S2         | 4.534       | 273.440         | 0.113   | ππ*       | Absorption |
| T5         | 4.702       | 263.710         | 0.000   | ππ*       |            |
| S3         | 4.893       | 253.390         | 0.307   | ππ*       |            |
| S4         | 5.144       | 241.030         | 0.099   | ππ*       |            |
| T6         | 5.220       | 237.530         | 0.000   | ππ*       |            |

**Table S304. TD-DFT Results. For PhotoNHC with I<sub>1b</sub>.**

| State Name | Energy (eV) | Wavelength (nm) | f-value | Character | Notes      |
|------------|-------------|-----------------|---------|-----------|------------|
| T1         | 3.170       | 391.100         | 0.000   | nπ*       |            |
| T2         | 3.567       | 347.560         | 0.000   | ππ*       | ISC        |
| S1         | 3.653       | 339.400         | 0.003   | nπ*       |            |
| T3         | 3.923       | 316.060         | 0.000   | ππ*       |            |
| T4         | 4.030       | 307.670         | 0.000   | ππ*       |            |
| S2         | 4.543       | 272.920         | 0.158   | ππ*       | Absorption |
| T5         | 4.703       | 263.610         | 0.000   | ππ*       |            |
| S3         | 4.800       | 258.320         | 0.292   | ππ*       |            |
| S4         | 5.046       | 245.720         | 0.105   | ππ*       |            |
| T6         | 5.183       | 239.220         | 0.000   | ππ*       |            |

**Table S305. TD-DFT Results. For PhotoNHC with I<sub>1c</sub>.**

| State Name | Energy (eV) | Wavelength (nm) | f-value | Character | Notes      |
|------------|-------------|-----------------|---------|-----------|------------|
| T1         | 3.098       | 400.240         | 0.000   | nπ*       |            |
| T2         | 3.456       | 358.720         | 0.000   | nπ*       |            |
| S1         | 3.658       | 338.920         | 0.002   | nπ*       |            |
| T3         | 3.799       | 326.330         | 0.000   | ππ*       | ISC        |
| T4         | 4.180       | 296.640         | 0.000   | ππ*       |            |
| S2         | 4.379       | 283.170         | 0.290   | ππ*       | Absorption |
| S3         | 4.635       | 267.490         | 0.055   | ππ*       |            |
| T5         | 4.672       | 265.410         | 0.000   | ππ*       |            |
| S4         | 4.956       | 250.160         | 0.110   | ππ*       |            |
| T6         | 4.962       | 249.860         | 0.000   | π*        |            |

**Table S306. TD-DFT Results. For PhotoNHC with I<sub>1d</sub>.**

| State Name | Energy (eV) | Wavelength (nm) | f-value | Character | Notes      |
|------------|-------------|-----------------|---------|-----------|------------|
| T1         | 3.165       | 391.690         | 0.000   | nπ*       |            |
| T2         | 3.576       | 346.720         | 0.000   | ππ*       | ISC        |
| S1         | 3.646       | 340.080         | 0.003   | nπ*       |            |
| T3         | 3.942       | 314.490         | 0.000   | ππ*       |            |
| T4         | 4.045       | 306.480         | 0.000   | ππ*       |            |
| S2         | 4.536       | 273.320         | 0.142   | ππ*       | Absorption |
| T5         | 4.700       | 263.830         | 0.000   | ππ*       |            |
| T6         | 4.735       | 261.840         | 0.000   | ππ*       |            |
| S3         | 4.744       | 261.340         | 0.018   | ππ*       |            |
| S4         | 4.829       | 256.750         | 0.286   | ππ*       |            |

**Table S307. TD-DFT Results. For PhotoNHC with I<sub>1e</sub>.**

| State Name | Energy (eV) | Wavelength (nm) | f-value | Character | Notes      |
|------------|-------------|-----------------|---------|-----------|------------|
| T1         | 3.173       | 390.740         | 0.000   | nπ*       |            |
| T2         | 3.518       | 352.430         | 0.000   | ππ*       | ISC        |
| S1         | 3.647       | 339.930         | 0.002   | nπ*       |            |
| T3         | 3.931       | 315.430         | 0.000   | ππ*       |            |
| T4         | 4.258       | 291.170         | 0.000   | ππ*       |            |
| S2         | 4.479       | 276.820         | 0.112   | ππ*       | Absorption |
| T5         | 4.698       | 263.890         | 0.000   | ππ*       |            |
| S3         | 4.880       | 254.090         | 0.340   | ππ*       |            |
| T6         | 5.206       | 238.160         | 0.000   | ππ*       |            |
| S4         | 5.219       | 237.560         | 0.125   | ππ*       |            |

## S15. Additional Analysis of Benzoin Condensation

**Table S308. Changes in Mulliken Charges.** Condensed Mulliken charges of relevant atoms in **B**, **TS1**, and **TS2**.

| Atom       | TS1     | B       | TS2     |
|------------|---------|---------|---------|
| Carbene-C  | -0.0118 | 0.1954  | 0.2305  |
| Carbene-N1 | -0.2036 | -0.2230 | -0.1963 |
| Carbene-N2 | -0.1993 | -0.2098 | -0.2222 |
| Backbone1  | 0.0801  | 0.1010  | 0.1175  |
| Backbone2  | 0.0918  | 0.1134  | 0.1106  |
| Adduct-C   | 0.2034  | 0.1771  | 0.1387  |
| Adduct-O   | -0.3669 | -0.5291 | -0.1342 |

From the above, we observe that the carbene carbon goes from being effectively neutral to partially cationic. It is this change in electronic population that is stabilised by anionic D-LEFs or destabilised by cationic D-LEFs.



**Chart S1.** The frontier molecular orbitals (HOMO-1, HOMO, LUMO, and LUMO+1) of **B** in the benzoin condensation catalysed by each of  $I_{2a}$ ,  $I_{2c}$ , and  $I_{2e}$ .

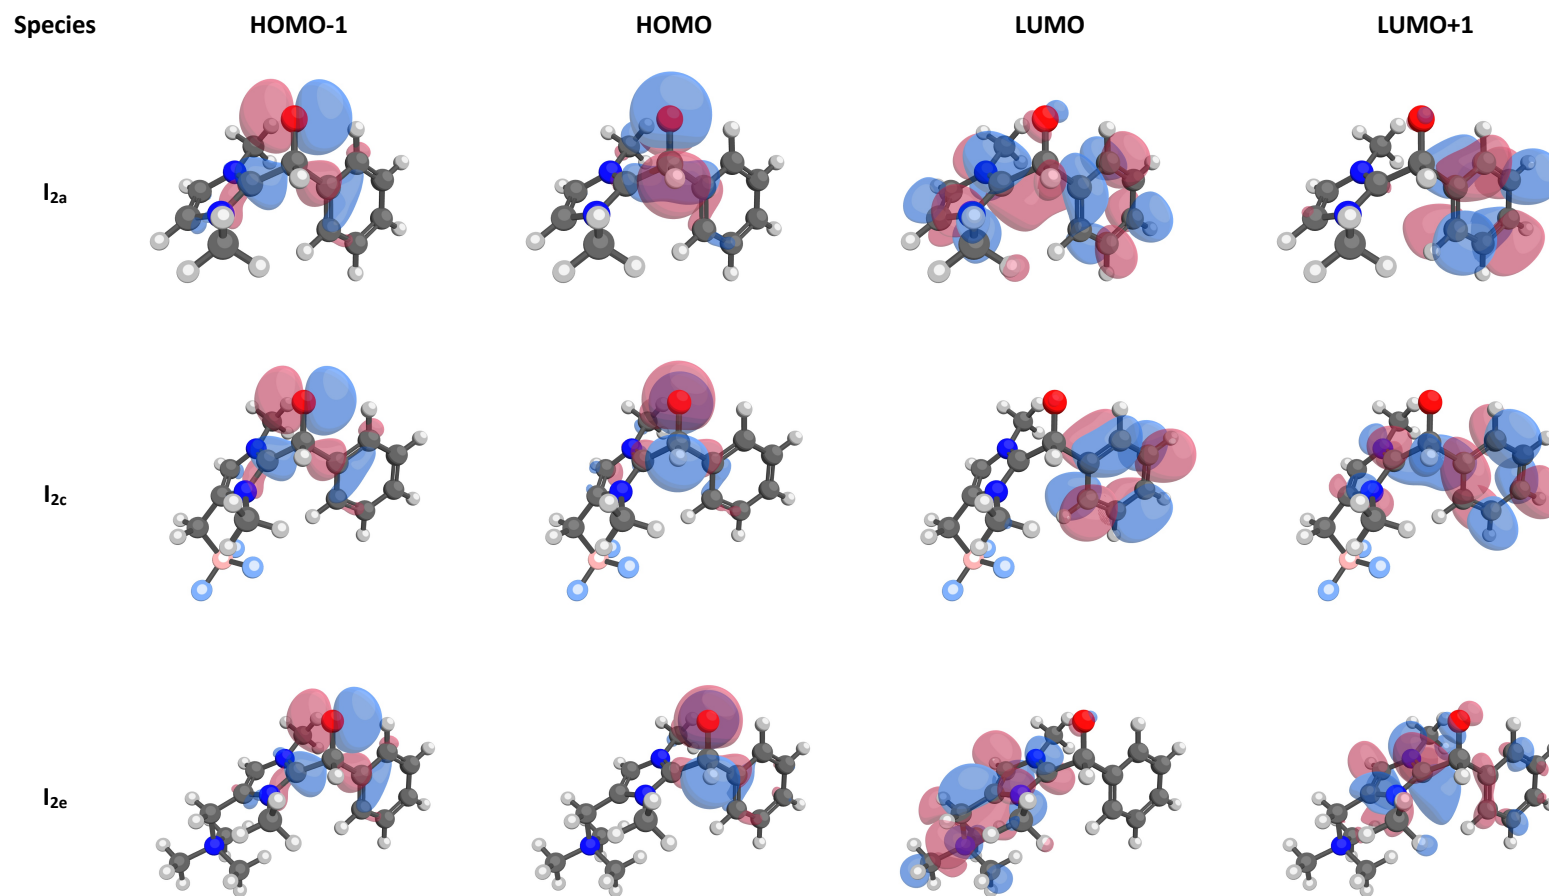

## S16. Investigation of Quadrupoles

**Table S309. Field-Independent Quadrupole Moments of Various Species.**

| Component                                 | $I_{2a}$ | Methylated | $I_{2b}$ | $I_{2c}$  | $\Delta$ Anionic Charge | $I_{2d}$ | $I_{2e}$ | $\Delta$ Cationic Charge |
|-------------------------------------------|----------|------------|----------|-----------|-------------------------|----------|----------|--------------------------|
| <b>Q<sub>xx</sub></b>                     | -32.0786 | -41.5178   | -77.3187 | -108.9982 | -31.6795                | -66.5061 | -43.272  | 23.2341                  |
| <b>YY</b>                                 | -45.2261 | -50.6733   | -57.1005 | -76.8657  | -19.7652                | -67.3374 | -58.6727 | 8.6647                   |
| <b>ZZ</b>                                 | -44.8778 | -51.2832   | -63.446  | -78.101   | -14.655                 | -69.7324 | -68.1082 | 1.6242                   |
| <b>XY</b>                                 | 0        | 5.4524     | 8.5209   | 13.2137   | 4.6928                  | -8.4003  | 6.1876   | 14.5879                  |
| <b>XZ</b>                                 | 0        | 0          | 0.0007   | 1.0867    | 1.086                   | -1.5725  | 2.0433   | 3.6158                   |
| <b>YZ</b>                                 | 0        | 0          | 0.0031   | 0.6016    | 0.5985                  | -1.5257  | -0.7705  | 0.7552                   |
| <b>Magnitude <math>\hat{Q}_l^2</math></b> | 2072.70  | 2663.76    | 4141.93  | 6389.28   |                         | 4912.96  | 4706.97  |                          |

Relative to  $I_{2a}$ , the magnitude of the field-independent quadrupole moment of  $I_{2b}$  and  $I_{2d}$  is significantly increased (from 2072.70 Debye-Angstrom to 4141.93 Debye-Angstrom and 4912.96 Debye-Angstrom, respectively). In each case, the effect manifests predominately in the XX component (where the D-LEF is predominately aligned along the X-coordinate), which is in line with the uncharged D-LEF enhancing the quadrupole moment. Upon introducing charges, the magnitude increases for  $I_{2c}$  to 6389.28 Debye-Angstrom, and decreases only slightly for  $I_{2e}$  to 4706.97 Debye-Angstrom. However, the differences once again manifest themselves predominately along the XX component, while their opposite sign and approximately-equal magnitude lend credence to the suggestion that these changes have an electrostatic origin. As an aside, it is possible that the small change in quadrupole magnitude from the cationic D-LEF arises because the cationic charge opposes the increased quadrupole caused by the remainder of the substituent in the non-XX components. Placing a methyl group at the 2-position, we also observe only a small increase in the magnitude of the quadrupole moment, to 2663.76 Debye-Angstrom, which also manifests along the XX-component.

The magnitude of the quadrupole moment is calculated according to the following equation from "Theory of Molecular Fluids Volume 1: Fundamentals" C. G. Gray and K. E. Gubbins, Oxford University Press, New York, 1984.

$$\hat{Q}_l^2 = \frac{4\pi}{2l+l} \sum_m |Q_{lm}|^2$$

Where, in the case of the quadrupole,  $l = 2$ ,  $m = 0, 1, 2$ , and

$$Q_{20} = \sqrt{\frac{5}{4\pi}} (Q_{zz})$$

$$Q_{21} = -\sqrt{\frac{5}{4\pi}} \sqrt{\frac{2}{3}} (Q_{xz} + iQ_{yz})$$

$$Q_{22} = -\sqrt{\frac{5}{4\pi}} \sqrt{\frac{1}{6}} (Q_{xx} - Q_{yy} + 2iQ_{xy})$$

## S17. Gaussian Log Files for Every Species

Gaussian log files for every species reported in this article are stored at <https://github.com/Ecaloota/CarbenesElectricFields>

If you encounter any issues accessing these files, please contact the corresponding author via the provided email, or the first author via [mitchell.blyth@anu.edu.au](mailto:mitchell.blyth@anu.edu.au)
